# Supplementary material for: Ablation of Histone Demethylase KDM5B in Melanoma Augments Anti-Tumor Immunity through Upregulation of Retroelements
Source: Research Square preprint supplement (doi:10.21203/rs.3.rs-87705/v1), 2020-11-06
Supplement: Supplementary file 1 [file 3599af8477b11c8cf5b40638.xlsx]

## Sheet: Extended Data Table 2
Extended Data Table 2: Relative KDM5B mRNA expression levels from RNA-seq data of pre-anti-PD-1 treatment specimens from Hugo et al.
Patient ID	irRECIST	pt	KDM5B
Pt8	Complete Response	Pt8.baseline	6.92762
Pt9	Complete Response	Pt9.baseline	7.13008
Pt13	Complete Response	Pt13.baseline	9.87611
Pt26	Complete Response
Pt27	Complete Response	Pt27A.baseline	8.78603
Pt33	Complete Response
Pt34	Complete Response
Pt2	Partial Response	Pt2.baseline	10.3488
Pt3	Partial Response
Pt4	Partial Response	Pt4.baseline	30.1525
Pt5	Partial Response	Pt5.baseline	23.8244
Pt6	Partial Response	Pt6.baseline	9.89474
Pt15	Partial Response	Pt15.baseline	11.1526
Pt18	Partial Response
Pt19	Partial Response	Pt19.baseline	7.83883
Pt21	Partial Response
Pt24	Partial Response
Pt28	Partial Response	Pt28.baseline	19.1781
Pt35	Partial Response	Pt35.baseline	8.05028
Pt37	Partial Response	Pt37.baseline	10.7292
Pt38	Partial Response	Pt38.baseline	5.28009
Pt1	Progressive Disease	Pt1.baseline	14.7728
Pt7	Progressive Disease	Pt7.baseline	6.3656
Pt10	Progressive Disease	Pt10.baseline	18.8789
Pt11	Progressive Disease
Pt12	Progressive Disease	Pt12.baseline	12.3141
Pt14	Progressive Disease	Pt14.baseline	14.9696
Pt16	Progressive Disease	Pt16.OnTx	14.545
Pt17	Progressive Disease
Pt20	Progressive Disease	Pt20.baseline	10.0237
Pt22	Progressive Disease	Pt22.baseline	13.1438
Pt23	Progressive Disease	Pt23.baseline	9.49079
Pt25	Progressive Disease	Pt25.baseline	13.3009
Pt29	Progressive Disease	Pt29.baseline	6.38649
Pt30	Progressive Disease
Pt31	Progressive Disease	Pt31.baseline	13.014
Pt32	Progressive Disease	Pt32.baseline	23.9478
Pt36	Progressive Disease

## Sheet: Extended Data Table 3
Extended Data Table 3: Normalized gene counts from RNA-seq analysis of YUMMER1.7 with Kdm5b sg vs Ctl
Sample	sz1_R17-sgRNA-ctl	sz2_R17-sgRNA-ctl	sz3_R17-sgRNA-ctl	sz4_R17-KDM5B-sg1	sz5_R17-KDM5B-sg2	sz6_R17-KDM5B-sg3
0610006L08Rik	0	0	0	0	0	0
0610007P14Rik	995.451	1114.64	1118.78	382.525	397.289	406.202
0610009B22Rik	236.643	258.56	261.308	282.654	251.402	287.252
0610009E02Rik	7.74902	12.8637	12.9789	7.53743	8.25775	11.3888
0610009L18Rik	10.1333	21.2251	6.0568	1.88436	3.67011	6.32714
0610009O20Rik	1107.51	1609.89	1391.33	1349.2	1269.86	1186.97
0610010F05Rik	657.474	686.921	667.978	725.478	712.919	801.015
0610010K14Rik	47.6863	13.5069	22.4967	11.3061	5.50516	7.59256
0610012D04Rik	0	0	0	0	0	0
0610012G03Rik	449.443	256.631	260.442	495.586	522.991	449.227
0610025J13Rik	0	0	0	0	0	0
0610030E20Rik	479.843	386.554	423.976	321.283	368.846	342.931
0610031O16Rik	0.596078	1.28637	0	2.82654	1.83505	3.79628
0610033M10Rik	0	0	0	0	0	0
0610037L13Rik	811.263	674.7	692.205	724.536	657.867	707.374
0610038B21Rik	31.5922	45.6661	37.206	29.2075	29.3609	30.3703
0610039K10Rik	0.596078	0.643184	0.865257	1.88436	0	1.26543
0610040B10Rik	10.1333	10.291	12.9789	14.1327	12.8454	12.6543
0610040F04Rik	1.19216	0.643184	0.865257	0	0	0
0610040J01Rik	0	0	0.865257	0	0	0
0610043K17Rik	0	0.643184	1.73051	0.942179	0	0
1010001B22Rik	1.78824	0.643184	0	1.88436	0.917527	0
1010001N08Rik	0	0	0	0	0	0
1110002E22Rik	0	0	0	0	0.917527	2.53085
1110002J07Rik	7.74902	7.71821	12.1136	5.65307	3.67011	8.85799
1110002L01Rik	269.427	178.162	227.563	537.984	589.97	589.689
1110002O04Rik	0	1.28637	0	0	0	0
1110003F10Rik	9.53725	2.57274	6.0568	0.942179	0	1.26543
1110004E09Rik	546.008	423.215	430.033	754.685	764.3	764.318
1110004F10Rik	2315.17	2719.38	2642.49	3853.51	3906.83	4111.37
1110006O24Rik	11.3255	14.7932	8.65257	6.59525	2.75258	6.32714
1110008E08Rik	0	0	0	0	0	0
1110008F13Rik	1940.24	1555.22	1611.97	2826.54	2800.29	2537.18
1110008L16Rik	331.42	227.044	275.152	428.691	432.155	439.103
1110008P14Rik	507.263	283.001	249.194	385.351	333.062	316.357
1110012L19Rik	244.988	387.197	372.926	260.984	265.165	299.906
1110015O18Rik	0	0	0	0	0	0
1110017D15Rik	0.596078	0	0	1.88436	0	0
1110018N20Rik	0	0	0	0	0	0
1110019D14Rik	35.1686	33.4456	35.4755	31.0919	28.4433	32.9011
1110020A21Rik	7.74902	10.291	7.78731	3.76872	4.58764	3.79628
1110025L11Rik	0	0	0	0	0	0
1110025M09Rik	11.9216	10.291	12.1136	3.76872	4.58764	7.59256
1110028F11Rik	0	0	0	0	0	0
1110028F18Rik	0	0	0	0	0	0
1110032A03Rik	207.435	188.453	196.413	197.858	186.258	206.265
1110032F04Rik	0	0	0	0	0	0
1110034G24Rik	62.5882	55.3139	61.4332	44.2824	53.2166	54.4134
1110035H17Rik	0	2.57274	1.73051	0	0	0
1110036E04Rik	0	0	0	0	0	0
1110037F02Rik	2460.61	2417.09	2549.05	2670.14	2717.72	2668.79
1110038B12Rik	3243.26	1074.76	1600.72	6286.22	5397.81	6023.43
1110038F14Rik	444.078	346.033	314.953	432.46	423.898	365.708
1110046J04Rik	94.7765	105.482	99.5045	235.545	272.506	258.147
1110051M20Rik	497.129	870.872	738.064	553.059	527.578	542.868
1110057P08Rik	0	0	0	0	0	0
1110059E24Rik	709.333	986.645	1012.35	1377.47	1360.69	1507.12
1110059G10Rik	216.376	273.353	260.442	353.317	306.454	287.252
1110060G06Rik	0	0.643184	0	0	0	0
1110065P20Rik	380.894	299.724	324.471	309.977	271.588	277.129
1190002N15Rik	571.043	794.976	821.994	495.586	491.795	532.745
1190003K10Rik	0	0	0	0	0	0
1190005I06Rik	1.19216	0.643184	0.865257	0	0	0
1190007I07Rik	53.6471	44.3797	42.3976	46.1668	42.2063	34.1665
1200007C13Rik	0	0	0.865257	0	0	0
1300002E11Rik	76.298	72.6798	76.1426	101.755	91.7527	59.4751
1300017J02Rik	0.596078	0.643184	2.59577	1.88436	4.58764	1.26543
1500002C15Rik	42.9176	77.8253	53.6459	38.6293	39.4537	35.432
1500002F19Rik	0.596078	0	0	1.88436	0.917527	0
1500004A13Rik	4.17255	6.43184	10.3831	0	2.75258	0
1500005C15Rik	0.596078	1.28637	0	0	0	1.26543
1500009C09Rik	0	0	0	0	0	0
1500009L16Rik	9.53725	5.14548	5.19154	1.88436	0	1.26543
1500011B03Rik	68.549	70.7503	64.029	59.3573	50.464	53.1479
1500011K16Rik	166.306	157.58	95.1782	248.735	201.856	182.222
1500012K07Rik	0	0	0	0	0	0
1500015A07Rik	55.4353	28.9433	40.6671	33.9184	37.6186	32.9011
1500015L24Rik	0	0	0	0	0.917527	1.26543
1500015O10Rik	0.596078	21.8683	19.9009	1.88436	0.917527	2.53085
1500017E21Rik	1.19216	0.643184	0	3.76872	0.917527	0
1500026H17Rik	0.596078	3.21592	0	0	1.83505	1.26543
1500035N22Rik	0	0	0	0	0	0
1520401A03Rik	1.78824	0	0	0	0	0
1600002D24Rik	0.596078	0.643184	0	0	0	0
1600002H07Rik	373.145	218.683	230.158	219.528	167.907	189.814
1600002K03Rik	222.337	104.839	128.923	207.279	201.856	201.203
1600010M07Rik	0.596078	0.643184	0	1.88436	1.83505	0
1600012H06Rik	711.718	1331.39	1143.87	644.45	663.372	679.534
1600012P17Rik	0	0	0	0	0	0
1600014C10Rik	164.518	273.997	265.634	231.776	256.908	234.104
1600014C23Rik	0.596078	1.28637	0	0	0	0
1600015I10Rik	0	0	0	0	0	0
1600017P15Rik	0.596078	0	0	0	0	0
1600019K03Rik	0	0	0	0	0	0
1600020E01Rik	94.1804	65.6048	83.9299	136.616	138.547	127.808
1600023N17Rik	1.78824	0.643184	1.73051	0	1.83505	1.26543
1600025M17Rik	0	0	0	0	0.917527	0
1600029O15Rik	0	0	0	0	0	0
1700001C02Rik	0	0	0	0	0	0
1700001C19Rik	0	0	0	0	0	0
1700001D01Rik	0	0	0	0	0	0
1700001F09Rik	0	0	0	0.942179	0	0
1700001G01Rik	0	0	0	0	0	1.26543
1700001G11Rik	2.38431	3.21592	0.865257	1.88436	4.58764	2.53085
1700001G17Rik	5.96078	7.07503	5.19154	1.88436	2.75258	7.59256
1700001J03Rik	0	0	0	0	0	1.26543
1700001J04Rik	0	0	0	0	0	0
1700001J11Rik	0	0	0	0	0	0
1700001K19Rik	0	0	0	0	0	0
1700001L05Rik	4.17255	5.14548	5.19154	10.364	11.0103	5.06171
1700001L19Rik	0	0	0	0	0	0
1700001N15Rik	0	0	0	0	0	0
1700001O22Rik	5.36471	3.21592	0.865257	0	0	0
1700001P01Rik	5.36471	0	2.59577	1.88436	5.50516	1.26543
1700003C15Rik	0	0	0	0	0	0
1700003D09Rik	0	0	0	0	0	0
1700003E16Rik	19.0745	30.8729	19.9009	20.7279	8.25775	15.1851
1700003E24Rik	0	0	0	0	0	0
1700003F12Rik	1.78824	0	0	0	0	0
1700003G13Rik	0	0	0	0	0	0
1700003G18Rik	0	0	0	0	0	1.26543
1700003H04Rik	0	0	0	0	0	0
1700003I16Rik	0	0	1.73051	0.942179	0	0
1700003I22Rik	0	0	0	0	0	0
1700003L19Rik	0	0	0	0	0	0
1700003M07Rik	0.596078	0	0.865257	1.88436	8.25775	0
1700003N22Rik	0	0.643184	0.865257	0.942179	0.917527	1.26543
1700003P14Rik	0	0	0	0	0	0
1700006A11Rik	0	0	0	0	0	0
1700006E09Rik	0	0	0	0	0	0
1700006F04Rik	0	0	0	0	0	0
1700006H21Rik	0	0.643184	0.865257	0	0	0
1700006J14Rik	4.76863	2.57274	4.32628	19.7858	15.598	12.6543
1700006P03Rik	0	0	0	0	0	0
1700007B14Rik	0	0	0	1.88436	1.83505	0
1700007E05Rik	0	0	0	0	0	0
1700007F19Rik	0	0	0	0	0	1.26543
1700007G11Rik	0.596078	0	0	1.88436	0.917527	1.26543
1700007J10Rik	7.15294	3.21592	0.865257	10.364	7.34022	3.79628
1700007K09Rik	2.38431	0	0.865257	0.942179	0.917527	1.26543
1700007K13Rik	1.78824	6.43184	0	11.3061	14.6804	2.53085
1700007L15Rik	26.2274	23.7978	20.7662	16.017	12.8454	22.7777
1700007M16Rik	0	0	0	0	0	0
1700007P06Rik	0	0	0	0	0	0
1700008A23Rik	0	0	0.865257	0	0	0
1700008B11Rik	0	0	0	0	0.917527	1.26543
1700008H02Rik	0	0	0	0	0	0
1700008J07Rik	25.6314	15.4364	14.7094	18.8436	17.433	15.1851
1700008K24Rik	0	0	0	0	0	0
1700008O03Rik	0	0	0	0	0.917527	2.53085
1700008P02Rik	0	0	0	0	0	0
1700009C05Rik	0	0	0	0	0.917527	0
1700009J07Rik	0	0	0	0	0	0
1700009N14Rik	0	0	0	10.364	10.0928	6.32714
1700010B08Rik	0	0	0	0	0	0
1700010B13Rik	0.596078	0.643184	0	0.942179	0.917527	0
1700010D01Rik	0	0	0	0	0	0
1700010H22Rik	0	0	0	0	0	0
1700010I02Rik	0	0	0	0	0	0
1700010I14Rik	7.15294	11.5773	11.2483	12.2483	21.1031	16.4506
1700010J16Rik	0.596078	0	0	0	0	0
1700010K23Rik	0.596078	0.643184	0	0	0	0
1700010K24Rik	0	0.643184	0.865257	0.942179	0.917527	0
1700010L04Rik	0	0	0	0	0	0
1700010N08Rik	0	0	0	0	0	0
1700011B04Rik	0	0	0	0	0	0
1700011C11Rik	0	0	0	0.942179	0.917527	0
1700011D18Rik	0	0	0	0	0	0
1700011E24Rik	1.19216	0.643184	0.865257	0.942179	0.917527	0
1700011H14Rik	0	0	0	0	0	0
1700011I03Rik	0	0	0	0	0	0
1700011L22Rik	0	0	0	0	0	0
1700011M02Rik	0	0	0	0	0	0
1700012A03Rik	0	0	0	0	0	0
1700012B07Rik	0	0	0	0	0.917527	0
1700012B09Rik	1376.94	674.057	755.369	4009.91	3960.05	3402.73
1700012C08Rik	0	0	0	0	0	0
1700012C14Rik	0	0	0	0	0	0
1700012D16Rik	0	0	0	0	0	0
1700012E03Rik	0	0	0	0	0	0
1700012I11Rik	0	0	0	0	0	0
1700012J22Rik	0	0	0	0	0	0
1700012L04Rik	0	0	0	0	0	0
1700012P22Rik	0	0	0	0	0	0
1700013A02Rik	0	0	0	0	0	0
1700013D24Rik	0	0	0	0	0	0
1700013F07Rik	0	0.643184	0	0	0.917527	1.26543
1700013G24Rik	0	0	0	0.942179	0	1.26543
1700013H16Rik	0	0	0	0	0	0
1700013M08Rik	0	0	0.865257	0	0	0
1700013N06Rik	0	0	0	0	0	0
1700014D04Rik	0.596078	0	0.865257	0.942179	0	2.53085
1700014F14Rik	0	0	0	0	0	0
1700015C17Rik	0	0	0	0	0	0
1700015E13Rik	0	0	0	0	0	0
1700015F17Rik	2.38431	1.28637	1.73051	5.65307	1.83505	8.85799
1700015G11Rik	0	0	0	1.88436	2.75258	3.79628
1700015O11Rik	0	0	0	0	0	0
1700016A09Rik	0	0	0	1.88436	0	0
1700016B15Rik	0	0	0	0	1.83505	0
1700016C15Rik	0	0	0.865257	0	0.917527	3.79628
1700016D06Rik	0	0	0	0	0	0
1700016D08Rik	0	0	0	0	0	0
1700016F12Rik	0	0	0	0	0	0
1700016G14Rik	0	0	0	0	0	0
1700016G22Rik	1.19216	0	0	0	0	0
1700016H13Rik	0	0	0	0	0	0
1700016K19Rik	0	0	0	0	0	0
1700016L21Rik	0	0	0	0	0	0
1700016P03Rik	1.78824	0.643184	0	0	2.75258	0
1700016P04Rik	0	0	0	0	0	0
1700017B05Rik	2451.07	1990.66	1719.27	1873.99	1679.99	1650.12
1700017D01Rik	0	0	0	0	0	0
1700017G19Rik	0	0	1.73051	0	1.83505	3.79628
1700017I07Rik	0	0	0	0	0	0
1700017J07Rik	0	0	0	0	0	0
1700017L05Rik	0	0	0	0	0	0
1700017N19Rik	0	0	0	0	0	0
1700018A04Rik	0.596078	0	1.73051	0	0.917527	2.53085
1700018A14Rik	0	0	0	0	0	0
1700018B08Rik	0	0	0	0	0	0
1700018B24Rik	0	0	0	0	0	0
1700018C11Rik	0	0	0	0	0	0
1700018F24Rik	0	0	0	0	0	0
1700018L02Rik	4.17255	2.57274	1.73051	0	4.58764	0
1700018M17Rik	0	0	0	0	0	1.26543
1700019A02Rik	0	0	1.73051	0	0	2.53085
1700019A23Rik	0	0	0	0	0	0
1700019B03Rik	0	0	0	0	0	0
1700019B21Rik	0	0	0	0	0	0
1700019D03Rik	0	0	0	0	0	0
1700019E08Rik	0	0	0	0	0	0
1700019G24Rik	0	0	0	0	0	0
1700019M22Rik	0	0	0	0	0	0
1700019N19Rik	0	0	0	0	0	0
1700019O17Rik	0	0	0	0	0	0
1700019P21Rik	0	0	0	0	0	0
1700020A23Rik	0	0	0	0	0	0
1700020D05Rik	1.19216	2.57274	0.865257	0	0	0
1700020G17Rik	0	0	0	0	0	0
1700020I14Rik	1747.11	1658.13	1773.78	1312.46	1445.11	1360.33
1700020L24Rik	2.98039	3.85911	2.59577	0	1.83505	0
1700020M21Rik	0	0	0	0	0	0
1700020N01Rik	0	0	0	0	0	0
1700020N15Rik	0	0	0	0	0	0
1700020N18Rik	0	0	0	0	0	0
1700021A07Rik	0	0	0	0	0	0
1700021F05Rik	485.208	477.886	431.763	454.13	513.815	427.714
1700021F07Rik	0	0	0	0	0	0
1700021F13Rik	0	0	0	0	0	0
1700021J08Rik	0	0	0	0	0	0
1700021L23Rik	0	0	0	0	0	0
1700021N21Rik	0	0	0	0	0	0
1700021P04Rik	0	0	0	0	0	0
1700022A21Rik	0	0	0	0	0	0
1700022A22Rik	0	0	0.865257	0	0.917527	1.26543
1700022E09Rik	0	0	0	0	0	0
1700022F17Rik	0	0	0	0.942179	0.917527	0
1700022H16Rik	0	0	0	0	0.917527	0
1700022I11Rik	2.98039	5.14548	7.78731	16.9592	11.0103	8.85799
1700022N22Rik	3.57647	1.92955	0	5.65307	5.50516	3.79628
1700023C21Rik	0	0	0	0	0	0
1700023F02Rik	0	0	0	0	0	1.26543
1700023F06Rik	0	0	0	0	0	0
1700023G09Rik	0	0	0	0	0	0
1700023H06Rik	0.596078	0	0	1.88436	0	0
1700024B05Rik	0	0	0	0	0	0
1700024B18Rik	0	0	0	0	0	0
1700024G13Rik	0	0	0	0	0	0
1700024J04Rik	0	0	0	0	0	0
1700024P04Rik	0	0	0	0	0	0
1700024P16Rik	2.38431	27.0137	20.7662	276.058	306.454	292.314
1700025A08Rik	0	0	0	0	0	0
1700025B11Rik	0	0	0	0	0	0
1700025C18Rik	0	0	0	0	0	0
1700025D23Rik	0	0	0	0	0	0
1700025F22Rik	0	0	0	0	0	0
1700025F24Rik	1.19216	0	0.865257	0	0	0
1700025G04Rik	213.992	259.203	246.598	300.555	311.959	296.11
1700025H01Rik	0	0	0	0	0	0
1700025J12Rik	0	0	0	0	0	0
1700025K24Rik	0	0	0	0	0	0
1700025M24Rik	0	0.643184	0	0	0	0
1700025N21Rik	0	0	0	0	0	0
1700025N23Rik	0	0	0.865257	0.942179	0.917527	0
1700025O08Rik	0	0	0	0	0	0
1700026D11Rik	0	0	0	0	0	0
1700026F02Rik	0	0	0	0	0.917527	0
1700026J12Rik	0	0	0	0	0	0
1700026J14Rik	0	0	0	0	0	0
1700027A07Rik	0.596078	0	0	0	0	0
1700027A15Rik	0	0	0	0	0	0
1700027F06Rik	0	0	0	0	0	0
1700027F09Rik	0	0	0	0	0	0
1700027H10Rik	0	0	0	0	0	0
1700027I24Rik	0	0	0	0	0	0
1700027J19Rik	2.98039	25.0842	13.8441	36.745	33.9485	20.2468
1700028B04Rik	0.596078	0	0	0	0	0
1700028D13Rik	0	0	0	0	0	0
1700028E10Rik	10.7294	16.0796	13.8441	9.42179	3.67011	6.32714
1700028I16Rik	1.78824	1.28637	3.46103	0.942179	1.83505	0
1700028J19Rik	4.17255	9.64777	12.9789	12.2483	9.17527	2.53085
1700028K03Rik	0	0	0	0	0	0
1700028M03Rik	0	0	0	0	0	0
1700028N14Rik	2.98039	0	0	0	0	0
1700028P14Rik	0	0	0	0	0	0
1700028P15Rik	0	0	0	0	0	0
1700029B22Rik	0	0	0	0	0	0
1700029B24Rik	0	0	0	0	0	0
1700029E06Rik	0	0	0	0	0	0
1700029F12Rik	0	0	0	0	0	0
1700029H14Rik	0.596078	0	0	0	0	0
1700029I15Rik	10.1333	10.291	15.5746	23.5545	15.598	24.0431
1700029J03Rik	0	0	0	0	0	0
1700029J07Rik	16.0941	20.5819	17.3051	8.47961	14.6804	11.3888
1700029M03Rik	0	0	0	0	0	0
1700029M20Rik	0	0	0	0	0	0
1700029N11Rik	0	0	0	0	0	0
1700029P11Rik	0	0	0	0	0	0
1700030A11Rik	0	0	0	0	0	0
1700030C10Rik	178.227	114.487	147.959	89.507	99.0929	91.1108
1700030C12Rik	1.19216	0	0	1.88436	0.917527	0
1700030C14Rik	0	0	0	0	0	0
1700030F04Rik	0	0	0	0	0	0
1700030I03Rik	0	0	0	0	0	0
1700030J22Rik	21.4588	32.8024	25.9577	36.745	26.6083	27.8394
1700030K09Rik	163.922	252.771	217.179	298.671	313.794	326.48
1700030L20Rik	0	0	0	0	0	0
1700030M09Rik	0	0	0	0	0	0
1700030N03Rik	0	0	0	0.942179	0.917527	2.53085
1700030N18Rik	0	0	0	0	0	0
1700030O20Rik	0	0	0	0	0	0
1700031A10Rik	0	0	0	0	0.917527	0
1700031F05Rik	0	0	0	0	0	0
1700031F10Rik	0	0	0	0	0.917527	0
1700031L13Rik	0	0	0	0	0	0
1700031M16Rik	0	0	0	0	0	0
1700031P21Rik	0.596078	0	0	0	0	1.26543
1700034B16Rik	0	0	0	0	0	0
1700034E13Rik	0	0	0	0	0	0
1700034G24Rik	0	0	0	0	0	0
1700034H15Rik	1.19216	1.28637	0.865257	0	0.917527	2.53085
1700034I23Rik	0	0	0	0	0	0
1700034J04Rik	0	0	0	0	0	0
1700034J05Rik	0	0	0	0	0	0
1700034K08Rik	0	0	0	0	0	0
1700034O15Rik	0	0	0	0	0	0
1700034P13Rik	5.96078	1.28637	0	8.47961	5.50516	12.6543
1700036A12Rik	0	0	0	0	0	0
1700036G14Rik	0	0	0	0	0	0
1700036O09Rik	0	0	0	0	0	0
1700037C06Rik	0	0	0	0	0	0
1700037C18Rik	62.5882	57.2434	60.568	51.8198	58.7217	53.1479
1700037F24Rik	0	0	0	0	0	0
1700037H04Rik	775.498	757.028	590.97	931.815	856.053	871.879
1700039E22Rik	0	0	0	0	0	0
1700039I01Rik	0	0	0	0	0	0
1700039M10Rik	0.596078	0	0	0.942179	0	0
1700039M15Rik	0	0	0	0	0	0
1700040D17Rik	0	0	0	0	0	0
1700040F15Rik	0	0	0	0	0	0
1700040F17Rik	0	0	0	0	0	0
1700040K01Rik	0	0	0	0	0	0
1700040L02Rik	0	0	0.865257	0.942179	0	1.26543
1700040L08Rik	0	0.643184	0.865257	0.942179	0	1.26543
1700041C23Rik	0	0	0	0	0	0
1700041G16Rik	0	0	0.865257	0	0	0
1700041M05Rik	0	0	0	0	0	0
1700041M19Rik	0	0	0	0	0	0
1700042D02Rik	0	0	0	0	0	0
1700042G07Rik	0	0	0	0	0	0
1700042G15Rik	0	0	0	0	0	0
1700042O10Rik	1.19216	1.92955	0.865257	0.942179	0	0
1700044C05Rik	0	0	0	0	0	0
1700044K03Rik	0	0	0	0	0	0
1700045H11Rik	0	0	0	0	0	1.26543
1700045I11Rik	0	0	0	0	0	0
1700046C09Rik	0	0	0	0	0	0
1700047A11Rik	0.596078	0	0	0	0	0
1700047F07Rik	0	0	0	0	0	0
1700047G03Rik	0	0	0	0	0	0
1700047I17Rik2	0	0	0	0	0	0
1700047K16Rik	0.596078	1.92955	0	0.942179	1.83505	1.26543
1700047L14Rik	0	0	0	0	0	0
1700047M11Rik	0	0	0	0	0	0
1700047N06Rik	0	0	0	0	0	0
1700048F04Rik	0	0	0	0	0	0
1700048M11Rik	0	0	0	0	0	0
1700048O20Rik	0	0	0	0	0	0
1700049E15Rik	0	0	0	0	0	0
1700049E17Rik1	0	0	0	0	0	0
1700049E17Rik2	0	0	0	0	0	0
1700049E22Rik	0	0	0	0	0	0
1700049J03Rik	0.596078	0	0	0	0	0
1700049L16Rik	0	0	0	0	0	0
1700051A21Rik	0	0	0	0	0	0
1700051K13Rik	0	0	0	0	0	0
1700051O22Rik	0	0	0	0	0	0
1700052I22Rik	0	0	0	0	0	0
1700052K11Rik	98.949	55.957	79.6036	70.6634	82.5775	86.0491
1700054A03Rik	0	0	0	0	0	0
1700054K02Rik	0	0	0	0	0	0
1700054K19Rik	0	0	0	0	0	0
1700054M17Rik	0	0	0	0	0	0
1700054O19Rik	1.19216	0.643184	0	0	0	0
1700055C04Rik	0	0	0	0	0	0
1700055D18Rik	1.78824	5.14548	4.32628	5.65307	3.67011	10.1234
1700056E22Rik	16.6902	23.1546	15.5746	25.4388	23.8557	16.4506
1700056N10Rik	11.3255	3.21592	3.46103	4.71089	5.50516	2.53085
1700057G04Rik	0	0.643184	0	0	0.917527	0
1700057H15Rik	0	0	0	0	0	0
1700057H21Rik	0	0	0	0.942179	0	0
1700058P15Rik	0	0	0	0	0	0
1700060C16Rik	0	0	0	0	0	0
1700060C20Rik	0	0	0	0	0	0
1700060J05Rik	0	1.28637	0	0	0	0
1700060O08Rik	0	0	0	0	0	0
1700061E17Rik	0	0	0	0	0	0
1700061E18Rik	0	0	0	0	0	0
1700061F12Rik	0	0	0	0	0	0
1700061G19Rik	0	0	0	0	0	0
1700061H18Rik	0	0	0	0	0	0
1700061I17Rik	0.596078	0	0	3.76872	3.67011	3.79628
1700061J23Rik	0	0	0	0	0	0
1700063A18Rik	0	0	0	0	0	0
1700063D05Rik	1.78824	0	0	0	0	0
1700063H04Rik	0	0	0	0	0	0
1700063H06Rik	0	0	0	0	0	0
1700063I16Rik	0	0	0	0	0	0
1700063K16Rik	0	0	0	0	0	0
1700063O14Rik	0	0	0	0	0	0
1700064H15Rik	0	0	0	0	0	0
1700064J06Rik	0	0	0	0	0	0
1700064M15Rik	0	0	0	0	0	0
1700065D16Rik	1.78824	1.28637	0.865257	1.88436	0	2.53085
1700065I16Rik	0	0	0	0	0	0
1700065J11Rik	0	0	0	0	0	0
1700065J18Rik	0	0	0	0	0	0
1700065L07Rik	0	0	0	0	0	0
1700065O20Rik	0	0	0	0	0	0
1700066B17Rik	0	0	0	0	0	0
1700066B19Rik	0	0	0	0	0	1.26543
1700066C05Rik	0	0	0	0	0	0
1700066J03Rik	0	0	0	0	0	1.26543
1700066M21Rik	205.051	368.545	339.181	161.113	161.485	180.956
1700066N21Rik	0	0	0	0	0	0
1700066O22Rik	0.596078	0	0.865257	0	0	0
1700067G17Rik	0	0	0	0	0	0
1700067K01Rik	13.1137	0	3.46103	0	0	1.26543
1700067P10Rik	0	0	0	0	0	0
1700069B07Rik	0	0.643184	0	0	1.83505	0
1700069L16Rik	0	0	0	0	0	0
1700069P05Rik	0	0	0	0	0	0
1700071G01Rik	0	0	0	0	0	0
1700071K01Rik	0	0	0	0	0	0
1700071M16Rik	0.596078	1.28637	2.59577	0	0	1.26543
1700072B07Rik	0	0	0	0	0	0
1700072G22Rik	0	0	0	0	0	0
1700072O05Rik	0	0	0	0	0	0
1700073E17Rik	0	0	0	0	0	0
1700074A21Rik	0	0	0	0	0	0
1700074H08Rik	0	0	0	0	0	0
1700074P13Rik	0	0	0	0	0	0
1700080E11Rik	0	0	0	0	0	0
1700080G11Rik	0	0	0	0	0	0
1700080N15Rik	0	0	0	0	0	0
1700080O16Rik	0	0	0	0	0	0
1700081H04Rik	0	0	0	0	0	0
1700082M22Rik	0	0	0	0.942179	0	0
1700083H02Rik	0	0	0	0	0	0
1700084C06Rik	2.98039	3.85911	0.865257	7.53743	4.58764	1.26543
1700084E18Rik	3.57647	4.50229	4.32628	1.88436	6.42269	0
1700084F23Rik	0	0	0	0	0	0
1700084J12Rik	0	0	0	0.942179	0	0
1700084M14Rik	0	0	0	0	0	0
1700085C21Rik	0	0	0	0	0	0
1700086D15Rik	1.19216	0.643184	0.865257	0.942179	0	0
1700086L19Rik	0	0	0	0	0	0
1700086O06Rik	104.314	51.4548	55.3764	81.9696	96.3404	89.8453
1700086P04Rik	0.596078	1.28637	1.73051	3.76872	1.83505	6.32714
1700087M22Rik	0	0	0	0	0	0
1700088E04Rik	39.9372	67.5344	54.5112	57.4729	62.3919	46.8208
1700091H14Rik	0	0	0	0	0	0
1700092C02Rik	0	0	0	0	0	0
1700092C10Rik	0	0	0	0	0	0
1700092C17Rik	0	0	0	0	0	0
1700092E19Rik	0	0	0	0	0	0
1700092K14Rik	0	0	0	0	0	0
1700092M07Rik	1.78824	0	4.32628	0.942179	1.83505	1.26543
1700093J21Rik	0	0.643184	0	0.942179	0.917527	0
1700093K21Rik	2.98039	1.92955	0	0	0	0
1700094J05Rik	0.596078	1.28637	0.865257	0.942179	0	0
1700094M24Rik	0	0	0	0	0	0
1700095A13Rik	0	0	0	0	0	0
1700095A21Rik	0	0	0	0	0	0
1700095B10Rik	0	0	0	0	0	0
1700095J03Rik	1.19216	0	0	0	0	0
1700095J07Rik	0	0	0	0	0	0
1700095J12Rik	0	0	0	0	0	0
1700095K22Rik	0	0	0	0	0	0
1700096J18Rik	0	0	0	0	0	0
1700096K18Rik	10.1333	10.9341	20.7662	17.9014	14.6804	6.32714
1700097M23Rik	0.596078	0	0	0	0	0
1700097N02Rik	0	0	0	0	0	0
1700099I09Rik	0	0	0.865257	0	1.83505	1.26543
1700100L14Rik	0	0	0	0	0	0
1700101I11Rik	4.17255	3.85911	4.32628	16.017	11.0103	12.6543
1700101I19Rik	0	0	0	0	0	0
1700101O22Rik	0	0	0	0	0	0
1700102F20Rik	0	0	0	0	0	0
1700102P08Rik	9.53725	2.57274	2.59577	13.1905	18.3505	7.59256
1700104B16Rik	0.596078	0	0	0	0	0
1700105P06Rik	5.36471	5.14548	6.0568	4.71089	2.75258	1.26543
1700108F19Rik	1.19216	0	0.865257	0.942179	3.67011	0
1700108J01Rik	0	0	0	0	0	0
1700108N11Rik	0	0	0	0	0	0
1700109G14Rik	0	0	0	0	0	0
1700109G15Rik	0	0	0	0	0	0
1700109H08Rik	56.0314	29.5865	44.9934	17.9014	28.4433	15.1851
1700109I08Rik	0	0	0	0	0	0
1700109K24Rik	0	0	0	0	0	0
1700110C19Rik	2.38431	0.643184	1.73051	0.942179	0	0
1700110I01Rik	0	0	0	0	0	0
1700110I07Rik	0	0	0	0	0	0
1700110K17Rik	0	0.643184	0	0.942179	1.83505	0
1700111E14Rik	0	0	0	0	0	0
1700111N16Rik	0	0	0	0.942179	0	0
1700112D23Rik	0	0.643184	1.73051	7.53743	3.67011	1.26543
1700112E06Rik	22.0549	73.9662	54.5112	48.9933	45.8764	48.0862
1700112H15Rik	0	0	0.865257	0	0.917527	0
1700112J05Rik	0	0	0	0	0	0
1700112J16Rik	0	3.85911	1.73051	3.76872	0.917527	0
1700112K13Rik	0	0	0	0	0	0
1700113A16Rik	17.8824	27.0137	24.2272	12.2483	14.6804	12.6543
1700113B19Rik	0	0	0	0	0	0
1700113H08Rik	0	0	0	0	0	0
1700116B05Rik	0	0	0	0	0	0
1700119H24Rik	0	0	0	0	0	0
1700119I11Rik	0	0	0	0	0	0
1700120B22Rik	0.596078	0	0	0.942179	0.917527	1.26543
1700120C14Rik	89.4118	5.78866	26.823	17.9014	10.0928	7.59256
1700120C18Rik	0	0	0	0	0	0
1700120E14Rik	0	0	0	0	0	0
1700120G07Rik	0	0	0	0	0	0
1700120G11Rik	0	0	0	0	0	0
1700120K04Rik	0	0	1.73051	0	0	0
1700120O09Rik	0	0	0	0	0	0
1700121C08Rik	0	0	0	0.942179	0	0
1700121L03Rik	0	0	0	0	0	0
1700121L16Rik	0	0	0	0	0	0
1700121N20Rik	0	0	0	0	0	0
1700122D07Rik	0	0	0	0	0	0
1700122E12Rik	1.19216	1.28637	0.865257	1.88436	3.67011	7.59256
1700122O11Rik	0	0	0	0	0	0
1700123K08Rik	0	0	0.865257	0	0	0
1700123L14Rik	0	0	0	0	0	0
1700123M08Rik	36.3608	37.9479	33.745	40.5137	43.1238	30.3703
1700123O12Rik	0	0	0	0	0	0
1700123O20Rik	672.972	588.514	635.964	1161.71	1146.91	1231.26
1700123O21Rik	0	0	0	0	0	0
1700124L16Rik	5.36471	3.85911	0.865257	1.88436	0.917527	3.79628
1700125G02Rik	0	0	0	0	0	0
1700125G22Rik	0.596078	0.643184	1.73051	0	0	0
1700125H03Rik	0	0	0	0	0	0
1700125H20Rik	0	0	2.59577	3.76872	2.75258	5.06171
1700126A01Rik	0	0	0	0	0	0
1700126G02Rik	0	0	0.865257	0.942179	0	0
1700126H18Rik	0	0	0	0	0	0
1700128A07Rik	0	0	0	0	0	0
1700128E19Rik	0	0	0	0	0	0
1700128F08Rik	0	0	0	0	0.917527	0
1700129C05Rik	0	0	0	0	0	0
1700129L04Rik	0	0	0	0	0	0
1810006J02Rik	0	0.643184	0	0	1.83505	0
1810007C17Rik	0	0.643184	0	0.942179	0	1.26543
1810007D17Rik	0	0	0	0	0	0
1810008B01Rik	1.19216	2.57274	0	0	2.75258	3.79628
1810008I18Rik	0	0	0	0	0	0
1810009A15Rik	22.0549	5.78866	11.2483	3.76872	5.50516	6.32714
1810009J06Rik	0	0	0	0	0	0
1810010D01Rik	0	0	0	0	0	0
1810010H24Rik	10.1333	18.6523	12.9789	3.76872	3.67011	5.06171
1810010K12Rik	0	0	0	0	0	0
1810011H11Rik	0	0	0	0	0	0
1810011O10Rik	483.42	1215.62	936.208	649.161	639.517	620.059
1810012K08Rik	2.98039	0	0	0	0.917527	0
1810012K16Rik	1.19216	1.92955	0.865257	0.942179	0.917527	0
1810013D15Rik	0	0.643184	0	0	0	0
1810013L24Rik	993.067	973.138	1036.58	2351.68	2452.55	2391.66
1810014B01Rik	35.7647	43.7365	36.3408	189.378	144.052	165.771
1810017P11Rik	0	0	0	0	0	0
1810018F18Rik	0	0	0	0	0	0
1810019D21Rik	0.596078	0	0.865257	0.942179	0	1.26543
1810019N24Rik	4.76863	2.57274	4.32628	1.88436	1.83505	0
1810020O05Rik	0	0.643184	0	0	0	0
1810021B22Rik	21.4588	18.0092	10.3831	12.2483	11.0103	6.32714
1810022K09Rik	918.557	544.777	662.787	876.226	1008.36	868.083
1810024B03Rik	57.8196	36.6615	40.6671	60.2995	56.8867	51.8825
1810026B05Rik	296.251	234.119	268.23	283.596	291.774	234.104
1810026J23Rik	1146.26	1232.34	1269.33	1769.41	1909.37	1982.92
1810030O07Rik	533.49	1063.83	886.888	395.715	444.083	454.288
1810032O08Rik	662.243	171.73	256.981	748.09	681.723	671.942
1810034E14Rik	35.1686	33.4456	32.0145	30.1497	37.6186	35.432
1810037I17Rik	938.227	740.948	685.283	722.651	731.269	703.578
1810041H14Rik	2.38431	0	2.59577	3.76872	0.917527	1.26543
1810041L15Rik	0	0.643184	0	0	0	0
1810043G02Rik	336.784	242.481	231.889	198.8	177.083	165.771
1810043H04Rik	208.627	85.5435	77.0078	150.749	125.701	118.95
1810044D09Rik	15.498	12.2205	15.5746	16.9592	18.3505	20.2468
1810046K07Rik	0	0	0	0	0	0
1810049J17Rik	0	1.28637	0	4.71089	2.75258	7.59256
1810053B23Rik	0	0	0	0	0	0
1810055G02Rik	2781.9	2905.91	2758.44	2862.34	2818.64	2725.73
1810058I24Rik	1003.2	627.748	654.999	1115.54	1128.56	1071.82
1810059C17Rik	0.596078	0.643184	0	1.88436	1.83505	0
1810059H22Rik	69.7412	83.614	77.0078	29.2075	41.2887	32.9011
1810062G17Rik	2.38431	5.78866	5.19154	0.942179	7.34022	3.79628
1810062O18Rik	4.76863	9.00458	5.19154	13.1905	10.0928	11.3888
1810063I02Rik	0	0	0	0	0	0
1810064F22Rik	0	0	0	0	0	0
1810065E05Rik	0.596078	0	0	0	0	0
2010001A14Rik	64.9725	66.8912	60.568	45.2246	33.9485	35.432
2010001K21Rik	0	0	0	0	0	0
2010003K11Rik	0	0	0	0	0	0
2010005H15Rik	0.596078	2.57274	4.32628	0.942179	3.67011	3.79628
2010007H06Rik	3.57647	6.43184	12.9789	0	0.917527	2.53085
2010008C14Rik	0	0	1.73051	0	0	0
2010009K17Rik	0	0	0	0	0	0
2010010A06Rik	0	0	0	0	0	0
2010013B24Rik	0	0	0	0	0	0
2010015M23Rik	6.55686	6.43184	4.32628	5.65307	5.50516	1.26543
2010016I18Rik	0	1.28637	0.865257	0	0	0
2010103J01Rik	0	0	0	0	0	0
2010106C02Rik	0	0	0	0	0	0
2010106E10Rik	0	0	0	0	0.917527	0
2010107E04Rik	870.87	619.387	692.205	781.066	748.702	763.053
2010107G23Rik	4.76863	3.85911	5.19154	28.2654	18.3505	17.716
2010109A12Rik	1.78824	0	0.865257	0	0.917527	1.26543
2010109I03Rik	0	0	0	0	0	0
2010109P13Rik	0	0	0	0	0	0
2010110E17Rik	1.19216	0	0	0.942179	5.50516	2.53085
2010110G14Rik	0	0	0	0	0	0
2010110K18Rik	32.1882	16.7228	19.0356	6.59525	3.67011	7.59256
2010111I01Rik	243.796	214.824	252.655	392.889	327.557	402.406
2010204K13Rik	106.698	41.807	51.9154	76.3165	57.8042	70.8639
2010300C02Rik	93.5843	97.764	73.5468	182.783	163.32	184.752
2010300F17Rik	1.78824	1.92955	0	128.136	178	150.586
2010308F09Rik	0	0	0	0	0	0
2010309G21Rik	0	0	0	0	0	0
2010310C07Rik	1.78824	0.643184	0.865257	3.76872	2.75258	11.3888
2010315B03Rik	107.89	185.237	201.605	150.749	160.567	142.993
2010320M18Rik	97.1608	73.9662	75.2773	88.5648	71.5671	84.7836
2010320O07Rik	0	0	0	1.88436	0.917527	0
2200002A13Rik	0	0	0	0	0	0
2200002D01Rik	381.49	247.626	216.314	208.222	188.093	177.16
2200002J24Rik	0	0	0	0	0	0
2200007N16Rik	0	0	0	0	0	0
2210008F06Rik	31.5922	9.00458	11.2483	13.1905	12.8454	15.1851
2210010C04Rik	0	0	0	0	0	0
2210011C24Rik	1.19216	0.643184	0	0	1.83505	0
2210011K15Rik	0.596078	1.92955	0.865257	2.82654	1.83505	3.79628
2210013O21Rik	497.129	462.45	422.245	342.011	373.434	339.135
2210016F16Rik	509.647	450.872	429.167	429.634	378.021	355.585
2210016L21Rik	545.412	533.2	481.948	409.848	319.299	366.974
2210017I01Rik	0	0	0	0	0	0
2210019I11Rik	0	0	0	0	0	0
2210406H18Rik	0	0	0	0	0	0
2210406O10Rik	10.1333	4.50229	12.1136	14.1327	11.0103	16.4506
2210407C18Rik	0	0	0	0	0	0
2210408F21Rik	46.4941	60.4593	56.2417	61.2416	48.6289	60.7405
2210408I21Rik	42.3216	48.882	40.6671	18.8436	34.866	21.5123
2210409E12Rik	0	0	0	0	0	0
2210411M09Rik	0.596078	0.643184	0.865257	0	1.83505	1.26543
2210412B16Rik	7.74902	3.85911	4.32628	0.942179	2.75258	0
2210414B05Rik	0	0	0	0	0	0
2210417A02Rik	5.96078	0	6.0568	1.88436	3.67011	1.26543
2210418O10Rik	0	0	0	0	0	0
2210420H20Rik	0	0	0	0	0	0
2300002M23Rik	0	0	0	0	0	0
2300003K06Rik	0	0	0	0	0	0
2300009A05Rik	100.141	72.0367	68.3553	112.119	83.495	77.1911
2310001H17Rik	5.36471	37.9479	34.6103	25.4388	25.6908	25.3085
2310001K20Rik	0	0	0	0	0	0
2310001K24Rik	0	0	0	0	0	0
2310002F09Rik	0	0	0	0	0	0
2310002L09Rik	0	0	0	0	0	0
2310003L06Rik	0	0	0	0	0	0
2310005A03Rik	0	0	0	0	0	0
2310005E17Rik	0	0	0	0	0	0
2310007B03Rik	0	0	0.865257	0	0	0
2310008N11Rik	0.596078	0.643184	0	1.88436	5.50516	5.06171
2310009A05Rik	56.6274	67.5344	55.3764	89.507	70.6496	63.2714
2310009B15Rik	216.973	136.998	109.022	95.1601	87.1651	97.4379
2310010J17Rik	27.4196	17.366	19.9009	8.47961	18.3505	8.85799
2310011J03Rik	984.125	499.754	545.977	1525.39	1466.21	1443.85
2310014F06Rik	5.96078	5.78866	9.51782	4.71089	10.0928	3.79628
2310015A10Rik	55.4353	65.6048	59.7027	32.0341	47.7114	41.7591
2310015D24Rik	0.596078	0	0	2.82654	1.83505	0
2310015K22Rik	0	0	0	0	0	0
2310016D03Rik	0	0	0	0	0	0
2310016D23Rik	0	0	0	0	0	0
2310016G11Rik	0	0	0.865257	0	0	0
2310020H05Rik	0	0	0	0	0	0
2310022A10Rik	468.518	558.284	453.395	858.325	768.888	771.911
2310022B05Rik	2896.94	3069.28	2668.45	3832.78	3628.82	3476.13
2310026I22Rik	0	0	0	0	0	0
2310026L22Rik	2.38431	1.28637	0.865257	0	0	0
2310030A07Rik	0	0	0	0	0	2.53085
2310030G06Rik	26.2274	29.5865	32.0145	22.6123	36.7011	46.8208
2310031A07Rik	0	0.643184	1.73051	1.88436	2.75258	1.26543
2310033P09Rik	481.035	265.635	271.691	198.8	162.402	170.833
2310034C09Rik	0	0	0	0	0	0
2310034G01Rik	6.55686	5.14548	4.32628	6.59525	6.42269	5.06171
2310034O05Rik	0	0.643184	0	0	0	0
2310035C23Rik	883.388	993.72	968.222	975.155	997.352	1012.34
2310036O22Rik	1564.11	930.688	897.271	1450.96	1329.5	1138.88
2310039H08Rik	145.443	109.985	90.852	126.252	113.773	93.6416
2310039L15Rik	0	0	0	0	0	0
2310040G07Rik	0.596078	0	3.46103	0	0.917527	0
2310040G24Rik	2.38431	3.85911	0.865257	0	0.917527	1.26543
2310043L19Rik	0	0	0	0	0	0
2310043M15Rik	0	0	0	2.82654	0.917527	0
2310043O21Rik	0	0	0	0	0.917527	0
2310043P16Rik	3.57647	2.57274	3.46103	7.53743	13.7629	12.6543
2310044K18Rik	0	0	0	0	0	0
2310046K23Rik	0	0	0	0	0	0
2310047D07Rik	0.596078	1.28637	4.32628	0	0	0
2310050C09Rik	0	0	0	0	0	0
2310057J18Rik	0	0	0	0	0	0
2310057M21Rik	287.31	178.162	192.952	448.477	404.63	396.079
2310057N15Rik	0	0	0	0	0	0
2310058D17Rik	39.3412	19.2955	24.2272	30.1497	32.1135	31.6357
2310061I04Rik	525.741	415.497	430.033	482.396	391.784	398.61
2310061N02Rik	0	0	0	0	0	0
2310065F04Rik	0	0	0	0	0	0
2310068J16Rik	4.76863	1.28637	0	3.76872	3.67011	6.32714
2310069B03Rik	1.78824	0	1.73051	3.76872	0	0
2310069G16Rik	0	0	0	0	0	0
2310074N15Rik	1.78824	3.21592	2.59577	2.82654	0.917527	1.26543
2310075C17Rik	0	0	0	0	0	0
2310079G19Rik	0	0	0	0	0	0
2310081O03Rik	1.19216	7.71821	12.9789	0	0	0
2410002F23Rik	1801.94	454.088	780.462	1193.74	1079.93	1133.82
2410003L11Rik	0	0	0	0	0	0
2410004B18Rik	340.361	240.551	288.996	665.178	626.671	614.998
2410004I01Rik	0	0	0	0	0.917527	0
2410004P03Rik	0	0	0	0	0	0
2410006H16Rik	1608.82	1157.09	1020.14	4179.51	3678.37	3626.71
2410012E07Rik	0.596078	0	0.865257	6.59525	6.42269	6.32714
2410015M20Rik	1272.03	1294.73	1224.34	956.312	945.053	1003.48
2410016O06Rik	477.459	288.147	314.953	503.124	469.774	518.825
2410017I17Rik	0	0	0	0	0	0
2410018L13Rik	0.596078	1.92955	0	0.942179	0.917527	0
2410021H03Rik	0	0	0	0	0	0
2410022M11Rik	33.9765	27.0137	27.6882	6.59525	6.42269	5.06171
2410024N13Rik	0	0	0	0	0	0
2410080I02Rik	0	0	0	0	0	0
2410089E03Rik	1106.92	1230.41	1119.64	795.199	827.61	817.466
2410124H12Rik	0	0	0	0	0	0
2410131K14Rik	587.137	664.41	639.425	1177.72	1213.89	1256.57
2410137M14Rik	0	0.643184	0	0	0	0
2410141K09Rik	0	0	0	0	0	0
2410152P15Rik	0	0	0	0	0	0
2500002B13Rik	27.4196	35.3751	41.5323	18.8436	32.1135	24.0431
2500004C02Rik	31.5922	20.5819	24.2272	15.0749	16.5155	13.9197
2510002D24Rik	51.2627	56.6002	49.3196	67.8369	66.9795	51.8825
2510009E07Rik	175.843	236.692	233.619	122.483	140.382	163.24
2510016D11Rik	23.2471	17.366	21.6314	5.65307	3.67011	8.85799
2510017J16Rik	2.38431	0.643184	2.59577	2.82654	0.917527	1.26543
2510039O18Rik	1995.67	2558.59	1972.79	1680.85	1543.28	1436.26
2510046G10Rik	8.3451	7.07503	4.32628	6.59525	0.917527	1.26543
2600006K01Rik	0.596078	0	0	0	0	0
2600014E21Rik	0	0	0	0.942179	1.83505	0
2610001A08Rik	0	0	0	0	0	0
2610001J05Rik	1058.64	1014.3	1146.47	952.543	1040.48	1074.35
2610002M06Rik	509.051	818.131	731.142	623.722	677.135	689.658
2610005L07Rik	153.788	142.144	191.222	278.885	347.743	385.955
2610008E11Rik	479.247	462.45	562.417	339.184	363.341	397.344
2610011E03Rik	0	0	0	0	0	0
2610012C04Rik	0	0	0	0	0	0
2610016A17Rik	0	0	0	0	0	0
2610020C07Rik	25.6314	12.2205	25.9577	17.9014	11.0103	21.5123
2610020F03Rik	0	0	0	0	0	0
2610020H08Rik	118.024	98.4072	109.888	63.126	66.062	65.8022
2610021A01Rik	333.804	210.964	276.882	657.641	728.517	737.744
2610024D14Rik	0	0	0	0	0	0
2610027F03Rik	0	0	0	0	0	0
2610027K06Rik	0	0.643184	0	0	0.917527	0
2610028E06Rik	0	0	0	0	0	0
2610028H24Rik	0	0	0	0	0	0
2610034O05Rik	0	0	0	0	0	0
2610035D17Rik	36.9569	14.1501	14.7094	26.381	26.6083	24.0431
2610035F20Rik	0	0	0	0	0	0
2610037D02Rik	17.2863	15.4364	19.0356	3.76872	10.0928	11.3888
2610042L04Rik	0	0	0	0	0	0
2610044O15Rik8	178.824	219.326	233.619	286.422	266.083	323.949
2610105M22Rik	0	0	0	0	0	0
2610203C20Rik	4961.16	3003.67	3974.12	1521.62	1591.91	1645.06
2610203C22Rik	80.4706	81.6844	67.49	53.7042	53.2166	53.1479
2610204G07Rik	0	0	0	0	0	0
2610206C17Rik	1.19216	1.92955	1.73051	0.942179	0.917527	0
2610300A13Rik	0	0	0	0	0	0
2610301B20Rik	277.176	401.99	386.77	461.668	463.351	489.72
2610303G11Rik	0	0	0	0	0	0
2610306M01Rik	62.5882	63.0321	55.3764	35.8028	34.866	34.1665
2610306O10Rik	13.1137	5.78866	8.65257	3.76872	5.50516	2.53085
2610307P16Rik	1.78824	3.85911	1.73051	5.65307	2.75258	2.53085
2610316D01Rik	0	0	0	1.88436	0.917527	0
2610318N02Rik	1.19216	0	2.59577	0	3.67011	2.53085
2610507B11Rik	9866.29	11772.2	11938.8	5303.53	5513.42	5603.31
2610507I01Rik	49.4745	57.2434	54.5112	32.9763	19.2681	30.3703
2610509F24Rik	0	0	0	0	0	0
2610524H06Rik	5.96078	57.2434	50.1849	0	0	0
2610528A11Rik	1.78824	0.643184	2.59577	3.76872	6.42269	6.32714
2610528J11Rik	0	0	0	0	0	0
2700012I20Rik	1.78824	3.21592	2.59577	0.942179	1.83505	2.53085
2700016F22Rik	2.38431	1.28637	3.46103	1.88436	1.83505	3.79628
2700029L08Rik	10.7294	0.643184	1.73051	0.942179	0	0
2700033N17Rik	16.6902	10.291	11.2483	10.364	11.0103	5.06171
2700038G22Rik	145.443	32.8024	58.8375	38.6293	39.4537	20.2468
2700046A07Rik	0	0	0	0	0	0
2700046G09Rik	20.2667	19.2955	20.7662	17.9014	22.9382	15.1851
2700049A03Rik	435.137	729.371	672.304	207.279	243.145	241.697
2700060E02Rik	2524.99	3315.62	3145.21	3294.8	3435.22	3484.99
2700062C07Rik	354.667	256.631	286.4	761.281	751.455	728.886
2700068H02Rik	0	0	0	0	0	0
2700069I18Rik	5.36471	9.00458	6.92205	4.71089	4.58764	2.53085
2700078F05Rik	0	0.643184	0	0	0	0
2700080J24Rik	0.596078	0	0.865257	1.88436	0	0
2700081O15Rik	1634.45	830.351	994.18	879.053	897.342	826.324
2700089I24Rik	0	0	0	0	0	0
2700094K13Rik	1033.6	479.172	443.877	831.944	709.249	647.899
2700097O09Rik	231.278	102.266	154.881	161.113	139.464	167.036
2700099C18Rik	197.898	218.04	220.64	67.8369	74.3197	64.5368
2810001G20Rik	57.2235	34.732	43.2628	34.8606	33.9485	35.432
2810002D19Rik	102.525	89.4026	103.831	221.412	200.938	230.308
2810004N23Rik	1031.22	767.962	817.668	2162.3	2324.1	2161.35
2810006K23Rik	245.584	311.301	300.244	239.313	209.196	206.265
2810013P06Rik	104.91	75.2526	89.9867	97.9866	89.9177	64.5368
2810021J22Rik	228.298	182.664	226.697	292.075	326.64	303.703
2810025M15Rik	506.071	392.986	406.671	635.029	571.619	626.387
2810029C07Rik	39.3412	34.732	38.9366	36.745	30.2784	40.4937
2810030D12Rik	0.596078	0.643184	2.59577	0	0.917527	0
2810032G03Rik	0	0	0	0	0	0
2810039B14Rik	2.98039	1.28637	1.73051	0	0	0
2810047C21Rik1	0	0	0	0	0	0
2810049E08Rik	0	0.643184	0	0.942179	0.917527	0
2810402E24Rik	114.447	101.623	96.9088	96.1022	106.433	84.7836
2810403A07Rik	1781.08	1426.58	1598.99	2352.62	2407.59	2454.93
2810403D21Rik	42.3216	36.6615	44.9934	27.3232	21.1031	27.8394
2810404F17Rik	0	0	0	0	0	0
2810404M03Rik	0	0	0	0	0	0
2810405F15Rik	0	0	0	0	0	0
2810405F17Rik	10.1333	11.5773	0.865257	4.71089	4.58764	2.53085
2810407A14Rik	1.19216	0	0	0	0	0
2810408A11Rik	39.3412	33.4456	40.6671	3.76872	1.83505	1.26543
2810408I11Rik	104.314	52.0979	73.5468	75.3743	90.8352	110.092
2810410L24Rik	63.1843	53.3843	39.8018	7.53743	7.34022	1.26543
2810414N06Rik	20.8627	19.2955	22.4967	19.7858	19.2681	27.8394
2810417H13Rik	2296.09	1713.44	2125.07	1684.62	1692.84	1632.4
2810425M01Rik	3.57647	1.92955	0.865257	4.71089	1.83505	0
2810428I15Rik	518.588	331.883	252.655	309.977	233.969	237.9
2810428J06Rik	2.98039	0.643184	2.59577	0.942179	1.83505	0
2810429I04Rik	39.9372	28.3001	36.3408	10.364	10.0928	6.32714
2810430I11Rik	20.8627	14.7932	16.4399	12.2483	12.8454	10.1234
2810432F15Rik	0	0	0	0	0	0
2810433D01Rik	0.596078	4.50229	2.59577	0.942179	0.917527	0
2810442N19Rik	0	0	0	0	0	0
2810454H06Rik	10.1333	8.3614	9.51782	0	0.917527	1.26543
2810455O05Rik	35.1686	64.9616	52.7807	10.364	15.598	22.7777
2810459M11Rik	0	1.28637	0	0	0	0
2810468N07Rik	0	0.643184	1.73051	0	0	0
2810471M01Rik	0	0	0	0	0	0
2810474O19Rik	928.69	1027.81	1104.93	2110.48	2296.57	2152.49
2900002M20Rik	0	0	0	0	0	0
2900005J15Rik	1.19216	0	1.73051	0	0	0
2900009J06Rik	4.17255	9.00458	3.46103	6.59525	0	1.26543
2900011O08Rik	0.596078	9.00458	3.46103	1.88436	0	1.26543
2900018N21Rik	0	1.28637	2.59577	0	0	0
2900022M07Rik	0	0	0	0	0	0
2900026A02Rik	597.271	1284.44	995.045	304.324	263.33	263.209
2900027M19Rik	0	0	0	0	0	0
2900035J10Rik	0	0	0	0	0	0
2900037B21Rik	0	0	0	0	0	0
2900041M22Rik	0.596078	0.643184	1.73051	1.88436	0	0
2900042K21Rik	19.6706	16.7228	12.9789	6.59525	12.8454	8.85799
2900052L18Rik	37.5529	19.9387	21.6314	10.364	2.75258	7.59256
2900052N01Rik	0	0	0	0	0	0
2900055J20Rik	0	0	0	1.88436	0	1.26543
2900060B14Rik	0.596078	1.28637	0	1.88436	0	1.26543
2900064F13Rik	2.98039	1.92955	3.46103	1.88436	1.83505	1.26543
2900064K03Rik	0	0	0	0	0	0
2900069G24Rik	0	0	0	0	0	0
2900072N19Rik	0	0	0.865257	0	0	0
2900076A07Rik	28.0157	25.7274	22.4967	44.2824	38.5361	45.5554
2900076G11Rik	1.78824	0	0.865257	0	0	0
2900079G21Rik	0	0	0	0	0	0
2900089D17Rik	23.2471	14.7932	18.1704	16.017	6.42269	20.2468
2900092C05Rik	0.596078	0	0	1.88436	0.917527	6.32714
2900092N22Rik	0.596078	0	0	0	0	0
2900092O11Rik	0	0	0	0	0	0
2900093K20Rik	17.8824	11.5773	9.51782	9.42179	9.17527	10.1234
2900097C17Rik	298.635	331.883	395.422	494.644	559.692	645.368
3000002C10Rik	79.2784	21.2251	28.5535	16.017	15.598	24.0431
3010001F23Rik	1.19216	0	1.73051	0.942179	0.917527	0
3010003L21Rik	13.1137	6.43184	6.92205	20.7279	26.6083	25.3085
3010026O09Rik	131.733	221.255	217.179	35.8028	44.9588	35.432
3100002H09Rik	0	0	0	0	0	0
3100003L05Rik	0	0	0	0	0	0
3110001I22Rik	38.7451	23.1546	26.823	63.126	60.5568	62.0059
3110002H16Rik	665.82	904.96	840.164	1100.46	1027.63	1175.58
3110004A20Rik	0	0	0	0	0	0
3110009E18Rik	107.294	64.3184	80.4689	70.6634	56.8867	59.4751
3110018I06Rik	0	0	0	0	0	0
3110021N24Rik	1.19216	1.28637	4.32628	1.88436	2.75258	0
3110031N09Rik	0	0	0	0	0	0
3110035E14Rik	0	0	0	0	0	0
3110039M20Rik	126.369	75.2526	70.0858	135.674	172.495	146.79
3110040N11Rik	141.867	167.871	149.689	248.735	207.361	241.697
3110043O21Rik	216.973	279.785	304.57	711.345	695.486	731.417
3110045C21Rik	29.2078	9.00458	7.78731	8.47961	8.25775	7.59256
3110053B16Rik	46.4941	39.8774	43.2628	24.4967	24.7732	15.1851
3110056K07Rik	63.7804	48.2388	58.8375	32.0341	36.7011	39.2282
3110062G12Rik	0	1.92955	1.73051	0	0	0
3110062M04Rik	153.192	82.3276	105.561	63.126	72.4847	65.8022
3110067C02Rik	3.57647	1.92955	2.59577	1.88436	1.83505	1.26543
3110070M22Rik	5.96078	5.78866	4.32628	1.88436	0	0
3110079O15Rik	2.38431	0	0	0	0	0
3110080O07Rik	1.19216	0	0.865257	0	0	0
3110082I17Rik	519.184	519.05	462.047	1274.77	1149.66	1207.22
3110082J24Rik	0.596078	0	0	0	0	0
3110083C13Rik	13.7098	7.71821	9.51782	12.2483	14.6804	12.6543
3110099E03Rik	0	1.28637	0.865257	0	0	0
3222401L13Rik	5.36471	7.07503	7.78731	4.71089	0	5.06171
3300002A11Rik	0	0	0	0	0	0
3300002I08Rik	14.902	23.1546	14.7094	17.9014	13.7629	6.32714
3300002P13Rik	0	0	0	0	0	1.26543
3300005D01Rik	57.2235	110.628	105.561	168.65	200.938	182.222
3425401B19Rik	0	0	0	0	0.917527	0
3632451O06Rik	1.19216	0	0	3.76872	2.75258	5.06171
3632454L22Rik	0	0	0	0	0	0
3830403N18Rik	640.784	982.786	929.286	982.693	1104.7	1012.34
3830406C13Rik	250.949	295.222	315.819	270.405	314.712	292.314
3830408C21Rik	4.76863	5.14548	5.19154	0	3.67011	3.79628
3830417A13Rik	33.3804	0	9.51782	0.942179	1.83505	0
3830422I06Rik	0	0.643184	0	0	0	0
3830432H09Rik	0	0	0	0	0	0
3930402G23Rik	17.8824	7.71821	9.51782	6.59525	2.75258	5.06171
4430402I18Rik	3.57647	12.2205	12.1136	14.1327	9.17527	13.9197
4631405J19Rik	1.19216	0	0	0	0	0
4631405K08Rik	0	0	0	0	0	0
4632404H12Rik	82.8549	59.173	63.1637	64.0682	49.5465	84.7836
4632404M16Rik	0	0	0	0	0	0
4632411P08Rik	1.78824	0.643184	0	0	0	0
4632415L05Rik	302.808	349.249	361.677	267.579	307.372	277.129
4632427E13Rik	33.3804	17.366	12.9789	11.3061	13.7629	11.3888
4632428C04Rik	0	0	0	0	0	0
4632432E15Rik	0	0	0	0	0	0
4633401B06Rik	5.96078	1.92955	0.865257	0	0	1.26543
4731419I09Rik	4.76863	3.21592	3.46103	1.88436	2.75258	2.53085
4732414G09Rik	4.17255	5.14548	3.46103	0.942179	0.917527	0
4732416N19Rik	21.4588	10.9341	11.2483	7.53743	9.17527	8.85799
4732419C18Rik	1.19216	0	0	0	0	0
4732440D04Rik	25.6314	25.7274	20.7662	11.3061	14.6804	8.85799
4732463B04Rik	0	0	0	0	0	0
4732465J04Rik	0	0	0	0	0	0
4732471J01Rik	8.94118	5.14548	9.51782	11.3061	10.0928	11.3888
4732487G21Rik	0	0.643184	0	0	0	1.26543
4732490B19Rik	0	0	1.73051	0	0	0
4732491K20Rik	24.4392	32.8024	41.5323	22.6123	24.7732	21.5123
4732496C06Rik	31.5922	62.3889	57.1069	47.1089	51.3815	30.3703
4831440E17Rik	0.596078	1.92955	2.59577	2.82654	0	0
4833403J16Rik	0	0	0	0	0	0
4833404L02Rik	0	0	0	0	0	0
4833407H14Rik	0	0.643184	0	0.942179	0	0
4833411C07Rik	0	0	0	0	0.917527	0
4833412C05Rik	0	0	0	1.88436	3.67011	10.1234
4833412K13Rik	7.15294	5.14548	7.78731	3.76872	1.83505	1.26543
4833413E03Rik	0	0	0	0	0	0
4833413G10Rik	30.4	46.3093	38.0713	8.47961	19.2681	17.716
4833417C18Rik	11.3255	7.07503	8.65257	2.82654	1.83505	1.26543
4833418N02Rik	62.5882	47.5956	57.1069	31.0919	26.6083	22.7777
4833418N17Rik	0	0	0	0	0	0
4833420G17Rik	578.792	579.509	586.644	482.396	483.537	539.072
4833421G17Rik	1.19216	0	0	0	0	0
4833421K07Rik	0	0	0	0	0	0
4833422C13Rik	0	0	0	0	0	0
4833422M21Rik	0	0	0	0	0.917527	0
4833423E24Rik	0	0	0	0	0	0
4833427F10Rik	0	0	0	0.942179	0	0
4833427G06Rik	43.5137	54.6707	43.2628	230.834	224.794	204.999
4833428L15Rik	0	0	0	0	0	0
4833439L19Rik	1513.44	1186.03	1261.54	1491.47	1597.41	1602.03
4833445I07Rik	14.902	10.9341	5.19154	2.82654	4.58764	6.32714
4921501E09Rik	0	0	0	0	0	0
4921504A21Rik	0	0	0	0	0	0
4921504E06Rik	0	0	0	0	0	0
4921507G05Rik	0	0	0	0	0	0
4921507P07Rik	4.76863	3.21592	2.59577	9.42179	8.25775	7.59256
4921508D12Rik	0	0	0	0.942179	0	0
4921508M14Rik	0	0	0	0	0	0
4921509A06Rik	0	0	0	0	0	0
4921509C19Rik	0	0.643184	0	0	0	0
4921511C10Rik	0	0	0	0	0	0
4921511C20Rik	0	0	0	0	0	0
4921511E07Rik	0	0	0	0	0	0
4921511H03Rik	0	0	0	0	0	0
4921511M17Rik	0	0	0	0	0	0
4921513D11Rik	0	0	0	0	0	0
4921513I03Rik	0	0	0.865257	0	1.83505	1.26543
4921513I08Rik	0	0	0	0	0	0
4921514A10Rik	2.38431	2.57274	0	7.53743	7.34022	2.53085
4921515E04Rik	0	0	0	0	0	0
4921517D22Rik	0	0	0	0	0	0
4921518K17Rik	0	0	0	0	0	0
4921521D15Rik	0	0	0	0	0	0
4921522P10Rik	0	0	0	0	0	0
4921523L03Rik	0	0	0	0.942179	0	0
4921524J17Rik	283.137	331.24	386.77	841.366	817.517	818.731
4921524L21Rik	0	0	0	0	0	0
4921527H02Rik	0	0	0	0	0	0
4921528I07Rik	0	0	0	0	0	0
4921529L05Rik	0	0	0	0	0	0
4921530L21Rik	0	0	0	0	0	0
4921531C22Rik	20.2667	16.0796	24.2272	24.4967	20.1856	21.5123
4921534H16Rik	0	0	0	0	0	0
4921536K21Rik	35.1686	32.8024	39.8018	107.408	108.268	117.685
4921539E11Rik	0	0	0	0	0	0
4921539H07Rik	0	0	0	0	0	0
4922502D21Rik	0	0	0	0	0	0
4922502N22Rik	0	0	0	0	0	0
4930401G09Rik	0	0	0	0	0	0
4930401O10Rik	0	0	0	0	0	0
4930401O12Rik	0	0	0	0	0	0
4930402C01Rik	0	0	0	0	0	0
4930402F06Rik	0	0	0	0	0	0
4930402F11Rik	0	0	0	0	0	0
4930402H05Rik	0	0	0	0	0	0
4930402H24Rik	1794.79	4856.69	4038.15	2772.83	2916.82	2963.63
4930402K13Rik	0	0	0	0	0	0
4930403D09Rik	0	0	0	0	0	0
4930403O15Rik	0	0	0	0	0	0
4930403P22Rik	0	0	0	0	0	0
4930404A12Rik	0	0	0	1.88436	0.917527	3.79628
4930404H24Rik	0	0	0	0	0	0
4930404I05Rik	0	0	0	0	0	1.26543
4930404N11Rik	2.38431	1.92955	5.19154	0.942179	0.917527	0
4930405A21Rik	5.36471	1.92955	5.19154	6.59525	5.50516	16.4506
4930405D11Rik	0	0	0	0	0	0
4930405G09Rik	0	0	0	0	0	0
4930405H06Rik	0	0	0	0	0	0
4930405L22Rik	0	0	0	0	0	0
4930405N21Rik	0	0	0	0	0	0
4930405O22Rik	1.19216	0	0	0.942179	0	0
4930406D18Rik	0	0	0	0	0	0
4930407G08Rik	0	0	0	0	0	0
4930407I10Rik	0	0	0	0	0.917527	0
4930408K08Rik	0	0	0	0	0	0
4930408O17Rik	0	0	0	0	0	0
4930412B13Rik	0	0	0	0	0	0
4930412C18Rik	0	0	0	0	1.83505	0
4930412E21Rik	0	0	0	0	0	0
4930412F09Rik	0	0	0	0	1.83505	1.26543
4930412L05Rik	0	1.92955	0	0.942179	2.75258	0
4930412M03Rik	5.36471	0.643184	2.59577	5.65307	2.75258	6.32714
4930412O13Rik	0	0	0	0	0	0
4930413E15Rik	0	0	0	0.942179	0	0
4930413G21Rik	0.596078	0	0	1.88436	0.917527	1.26543
4930415F15Rik	0	0	0	0	0	0
4930415H17Rik	0	0	0	0	0	0
4930415L06Rik	0	0	0	0	0	0
4930415O20Rik	0	0	0	0	0.917527	1.26543
4930417H01Rik	19.0745	28.3001	28.5535	26.381	20.1856	26.574
4930417O13Rik	0	0	0	0	0	0
4930417O22Rik	0	0	0	0	0	0
4930419G24Rik	0	0	0	0	0	0
4930420N18Rik	0	0	0	0	0	0
4930421C12Rik	0	0	0	0	0	0
4930421P07Rik	0	0	0	0	0	0
4930422M22Rik	0	0	0	0	0	0
4930423C22Rik	0	0	0	0	0	0
4930423M02Rik	0	0	0	0	0	0
4930425K10Rik	0	0	0	0	0	0
4930425L21Rik	0	0	0	0	0	0
4930425O10Rik	0	0	0	0	0	0
4930426D05Rik	0	0	0	0	0	0
4930426I24Rik	0	1.92955	1.73051	0	0.917527	1.26543
4930426L09Rik	4.17255	4.50229	2.59577	6.59525	9.17527	1.26543
4930427A07Rik	703.969	486.891	562.417	211.99	187.176	216.388
4930428N03Rik	0	0	0	0	0	0
4930428O21Rik	0.596078	0.643184	0	0	0	0
4930429D17Rik	4.76863	6.43184	3.46103	0.942179	0	1.26543
4930429F24Rik	0.596078	0.643184	0	0	0	0
4930429H19Rik	0	0	0	0	0	0
4930429P21Rik	0	0	0	0	0	0
4930430A15Rik	0	0	0	0	0	0
4930430E12Rik	0	0	0	0	0	0
4930430F08Rik	237.835	430.29	392.827	372.161	406.465	426.449
4930430O22Rik	0	0	0	0	0	0
4930431F12Rik	0	0	0	0	0	0
4930431L21Rik	0	0	0	0	0	0
4930431P03Rik	0	0	0.865257	0	0	0
4930431P19Rik	5.36471	3.85911	8.65257	4.71089	3.67011	6.32714
4930432B10Rik	0	0	0	0	0	1.26543
4930432E11Rik	0	0.643184	0	0	0	0
4930432H08Rik	0	0	0	0	0	0
4930432K21Rik	39.9372	108.698	89.9867	50.8777	39.4537	46.8208
4930432L08Rik	0	0	0	0	0	0
4930432M17Rik	0	0	0	0	0	0
4930433B08Rik	0	0	0	0	0	0
4930433I11Rik	0	0	0	0	0	0
4930433J02Rik	0	0	0	0	0	0
4930433N12Rik	0	0	0	0	0	0
4930434B07Rik	0	0	0	0	0	0
4930434O05Rik	0	0	0	0	0	0
4930435C17Rik	0	0	0	0	0	0
4930435E12Rik	0	0	0	0	0	0
4930435N07Rik	0	0	0	0	0	0
4930438A08Rik	0	0	0	0	0	0
4930438E09Rik	0	0	0	0	0	0
4930439A04Rik	0	0	0	0	0	0
4930439D14Rik	0	0	0	0	0	0
4930440C22Rik	0	0	0	0	0	0
4930440I19Rik	0	0	0	0.942179	0	0
4930441H08Rik	0	0	0	0	0	0
4930441J16Rik	0	0	0	0	0	0
4930442H23Rik	0	0	0	0	0	0
4930442J19Rik	0	0	0	0	0	0
4930442L01Rik	0	0	0	0	0	0
4930442P19Rik	0	0	0	0	0	0
4930443G03Rik	0	0	0	0	0	0
4930443O20Rik	0	1.92955	0.865257	1.88436	0.917527	1.26543
4930444A19Rik	0	0	0	0	0	0
4930444E06Rik	0	0	0	0	0	0
4930444G20Rik	0	0	0	0	0	0
4930444M15Rik	0	0	0	0	0	0
4930444P10Rik	0	0.643184	2.59577	0	1.83505	0
4930445B16Rik	0	0	0	0	0	0
4930445N08Rik	0	0	0	0	0	0
4930445N18Rik	1.19216	0.643184	0.865257	0.942179	0	0
4930447A16Rik	0	0	0	0	0	0
4930447C04Rik	0	0.643184	0	0	0	0
4930447C11Rik	0	0	0	0	0	0
4930447F04Rik	0.596078	0	0	0	0	0
4930447F24Rik	577.6	732.587	640.29	185.609	153.227	170.833
4930447M23Rik	0	0	0	0	0	0
4930447N08Rik	5.96078	1.92955	6.92205	7.53743	4.58764	6.32714
4930448A20Rik	0	0	0	0	0	0
4930448D08Rik	0	0	0	0	0	0
4930448E22Rik	0	0	0	0	0	0
4930448H16Rik	0	0	0	0	0	0
4930448I06Rik	0	0	0	0	0	0
4930448I18Rik	0	0	0	0	0	0
4930448K20Rik	0	0	0	0	0	0
4930449A18Rik	0	0	0	0	0	0
4930449E01Rik	0	0	0	0	0	0
4930449I04Rik	0	0	0	0	0	0
4930449I24Rik	0	0	0	0	0	0
4930451E10Rik	1.19216	0	0	0.942179	0	0
4930451G09Rik	6.55686	4.50229	6.92205	1.88436	0.917527	2.53085
4930451I11Rik	0	0	0	0	0	0
4930452B06Rik	0	0.643184	0.865257	0	0	0
4930452N14Rik	0	0	0	0	0	0
4930453H23Rik	0	0	0	0.942179	0	1.26543
4930453L07Rik	0	0	0	0	0	0
4930453N24Rik	636.016	469.525	542.516	1164.53	1238.66	1162.93
4930453O03Rik	0	0	0	0	0	0
4930455B14Rik	0	0	0	0	0	0
4930455D15Rik	0	0	0.865257	0	1.83505	0
4930455G09Rik	0	0	0	0	0	0
4930455H04Rik	0	0	0	0	0	0
4930456G14Rik	0	0	0	0	0	0
4930456L15Rik	0.596078	0	0	0	0	0
4930458D05Rik	11.3255	38.5911	22.4967	16.017	18.3505	30.3703
4930459L07Rik	0	0	0	0	0	0
4930461C15Rik	0	0	0	0	0.917527	0
4930461G14Rik	0	0	0	0	0	0
4930463O16Rik	0	0	0	0	0	0
4930465K10Rik	0.596078	0	0.865257	0	0	0
4930465M20Rik	0	0	0	0	0	0
4930466I24Rik	0	0	0	0	0	0
4930467D21Rik	12.5176	22.5115	19.9009	9.42179	11.0103	16.4506
4930467E23Rik	0	0	0	0	0	0
4930467K11Rik	0	0.643184	0.865257	0.942179	0	0
4930469B13Rik	0	0	0	0	0	0
4930469G21Rik	0	0	0	0	0	1.26543
4930469K13Rik	0	0	0	0	0	0
4930470B04Rik	0	0	0	0	0	0
4930470G03Rik	0.596078	0.643184	0	0.942179	0.917527	0
4930470P17Rik	0	0	0	0	0	0
4930471C04Rik	0	0	0	0	0	0
4930471C06Rik	0	0	0	0	0	0
4930471D02Rik	0	0	0	0	0	0
4930471M09Rik	0.596078	0	0	0.942179	0.917527	0
4930473A02Rik	2.38431	3.85911	2.59577	0.942179	1.83505	2.53085
4930473D10Rik	0	0	0	0	0.917527	0
4930474B08Rik	0	0	0	0	0	0
4930474H06Rik	0	0	0	0	0	0
4930474N05Rik	0	0	0	0	0	0
4930477E14Rik	0	0	0	0	0	0
4930477O15Rik	0	0	0	0	0	1.26543
4930478K11Rik	0	0	0	0	0	0
4930478M09Rik	0	0	0	0	0	0
4930478P22Rik	0	0	0	0	0	0
4930479D17Rik	1.19216	0	0.865257	0	0	1.26543
4930480E11Rik	0	0	0	0	0	0
4930480G23Rik	0	0	0.865257	0	0	0
4930480K02Rik	0	0	0	0	0	0
4930480K15Rik	0	0	0	0	0	0
4930480K23Rik	11.9216	13.5069	10.3831	7.53743	5.50516	3.79628
4930481A15Rik	20.2667	18.6523	18.1704	16.017	17.433	17.716
4930481B07Rik	4.17255	6.43184	11.2483	5.65307	2.75258	5.06171
4930483J18Rik	2.38431	0	2.59577	2.82654	0.917527	2.53085
4930483K19Rik	0	0	0	0	0	0
4930486F22Rik	0	0.643184	0	1.88436	0	0
4930486I03Rik	0	0	0	0	0	0
4930486L24Rik	20.8627	7.07503	12.9789	25.4388	20.1856	26.574
4930486N12Rik	0	0	0	0	0	0
4930487D11Rik	0	0	0	0	0	0
4930488B22Rik	0	0	0	0	0	0
4930488N24Rik	0	0	0	0	0	0
4930500F04Rik	0	0	0	0	0	0
4930500F10Rik	1.78824	0.643184	1.73051	0.942179	1.83505	0
4930500L23Rik	0	0	0	0	0	0
4930500M09Rik	0	0	0	2.82654	0	1.26543
4930502C17Rik	0	0	0	0	0	0
4930502E09Rik	0	0	0	2.82654	0	0
4930502E18Rik	1.19216	2.57274	1.73051	0	0.917527	0
4930503B20Rik	0	0	0	1.88436	0.917527	1.26543
4930503E14Rik	0.596078	0	0	0.942179	0	1.26543
4930503H13Rik	0	0	0	0	0	0
4930503L19Rik	790.4	870.229	869.583	664.236	732.187	670.676
4930503O07Rik	0	0	0	0	0	0
4930504D19Rik	0	0	0	0	0	0
4930504O13Rik	0	0	0	0	0	0
4930505A04Rik	0.596078	1.28637	2.59577	0.942179	1.83505	0
4930505G20Rik	0	0	0	0	0	0
4930505K14Rik	0	0.643184	0	0	0	0
4930505M18Rik	0	0	0	0	0	0
4930505N22Rik	0	0	0.865257	0	1.83505	0
4930505O20Rik	0	0	0	0	0	0
4930506C21Rik	0.596078	0	0	1.88436	3.67011	2.53085
4930507D05Rik	2.38431	1.28637	1.73051	3.76872	5.50516	5.06171
4930507D10Rik	0	0	0	0	0	0
4930509E16Rik	13.1137	7.07503	19.0356	23.5545	20.1856	22.7777
4930509G22Rik	1.78824	3.85911	1.73051	5.65307	2.75258	3.79628
4930509H03Rik	0	0	0	0	0	0
4930509J09Rik	0	0	0	0	0	0
4930509K18Rik	0	0	0	0	0	0
4930510E17Rik	0	0	0	0	0	0
4930511A02Rik	0	0	0	0	0	0
4930511E03Rik	0.596078	0	0	0	0	0
4930511M06Rik	14.902	12.2205	7.78731	29.2075	44.9588	27.8394
4930511M18Rik	0	0	0	0	0	0
4930511O05Rik	0	0	0	0	0	0
4930512B01Rik	6.55686	1.92955	2.59577	46.1668	33.031	39.2282
4930512H18Rik	0	0	0	0	0	0
4930512M02Rik	0	0	0	0	0	0
4930512P04Rik	0	0	0.865257	0	0	0
4930513D17Rik	0	0	0	0	0	0
4930513N10Rik	9.53725	7.07503	14.7094	13.1905	9.17527	8.85799
4930513N20Rik	0.596078	0	0	0.942179	0	0
4930513O06Rik	0	0	0	0	0	0
4930515B02Rik	0	0	0	0	0	0
4930515G01Rik	16.6902	12.2205	5.19154	12.2483	14.6804	3.79628
4930515G13Rik	0	0	0	0	0	0
4930515G16Rik	0	0	0	0	0	0
4930515L19Rik	0	0	0	0	0	0
4930516B21Rik	1.19216	0	0	0	0	0
4930516K23Rik	0	0	0	0	0	0
4930517E11Rik	0	0	0	0	0	0
4930517G19Rik	0	0	0	0	0	0
4930517J16Rik	0	0	0	0	0	0
4930517L18Rik	0	0	0	0	0	0
4930517O19Rik	0	0	0	0	0	1.26543
4930518C09Rik	0	0	0	0	0	0
4930518I15Rik	12.5176	11.5773	9.51782	0.942179	3.67011	6.32714
4930518I17Rik	0	0	0	0	0	0
4930518J20Rik	0	0	0	0	0	0
4930519A11Rik	0	0	0	0	0	0
4930519D14Rik	0	0	0	0	0	0
4930519E07Rik	0	0	0	0	0	0
4930519F09Rik	0	0.643184	0	0	0	0
4930519F16Rik	2.38431	9.00458	5.19154	2.82654	0.917527	0
4930519F24Rik	0	0	0	0	0	0
4930519G04Rik	0	0	0	0	0	0
4930519H02Rik	0	0	0	0	0	0
4930519L02Rik	0	0	0	0	0	0
4930519P11Rik	0.596078	1.28637	1.73051	0.942179	1.83505	2.53085
4930520M14Rik	0	0	0	0	0	0
4930520O04Rik	2.98039	2.57274	5.19154	5.65307	4.58764	7.59256
4930521E06Rik	0	0	0	0	0	0
4930522H14Rik	0	0	0	0	0	0
4930522L14Rik	86.4314	119.632	150.555	98.9288	97.2579	118.95
4930522N08Rik	0	0	0	0	0	0
4930522O17Rik	0	0	0	0	0	0
4930523C07Rik	1083.67	1749.46	1653.51	420.212	400.042	416.326
4930524B15Rik	0	0	0	1.88436	3.67011	5.06171
4930524B17Rik	0	0	0	0	0	0
4930524J08Rik	26.2274	5.14548	7.78731	5.65307	1.83505	3.79628
4930524N10Rik	0	0	0	0	0	0
4930524O07Rik	10.7294	4.50229	2.59577	15.0749	9.17527	17.716
4930524O08Rik	0	0	0	0	0	0
4930525G20Rik	0	0	0	0.942179	0.917527	0
4930526A20Rik	4.76863	0.643184	0	2.82654	0.917527	1.26543
4930526F13Rik	0	0	0	0	0	0
4930526L06Rik	0	0	0	0	0	0
4930526M16Rik	0	0	0	0	0	0
4930527A07Rik	0	0	0	0	0	0
4930527B05Rik	0	0	0	0	0	0
4930527E20Rik	1.78824	0	0.865257	0	0.917527	0
4930527J03Rik	0	0	0	0	0	0
4930528D03Rik	0	0	0	0	0	0
4930528G23Rik	0	0	0	0	0	1.26543
4930528J11Rik	0	0	0	0	0	0
4930528P14Rik	0	0	0	0	0	0
4930529C04Rik	0.596078	0	0	0	0	0
4930529I22Rik	0	0	0	0	0	0
4930532G15Rik	1.19216	0	0	0.942179	1.83505	2.53085
4930532M18Rik	0	0	0	0	0	0
4930533B01Rik	0	0	0	0	0	0
4930533D04Rik	0	0	0	0	0	0
4930533I22Rik	0	0	0	0	0	0
4930533K18Rik	0	0	0	0	0	0
4930533L02Rik	0	0	0	0	0	0
4930533P14Rik	0	0	0	0	0	0
4930534D22Rik	1.78824	1.92955	0	2.82654	1.83505	0
4930535E02Rik	0	0	0	0	0	0
4930535G08Rik	0	0	0	0	0	0
4930535I16Rik	0	0	0.865257	0.942179	0.917527	1.26543
4930535L15Rik	0	0	0	0	0	0
4930535O05Rik	0	0	0	0	0	0
4930537H20Rik	0	0.643184	0	0	0.917527	0
4930538E20Rik	0	0.643184	0	0	0	0
4930538K18Rik	2.38431	1.92955	0.865257	0.942179	1.83505	0
4930539C22Rik	0	0	0	0	0	0
4930539E08Rik	0	0	0	1.88436	0.917527	0
4930539J05Rik	6.55686	3.21592	5.19154	6.59525	8.25775	6.32714
4930539M17Rik	0	0	0	0	0	0
4930540E01Rik	0	0	0	0	0	0
4930540M05Rik	1.19216	0.643184	2.59577	0.942179	0.917527	6.32714
4930542C12Rik	0	0	0	0	0	0
4930542C16Rik	0	0	0	0	0	0
4930544D05Rik	0	0	0	0	0	0
4930544G11Rik	0	0	0	0	0	0
4930544I03Rik	0	0	0	0	0	0
4930544L04Rik	0	0	0	0	0	0
4930544M13Rik	0	0	0.865257	2.82654	0.917527	1.26543
4930545L23Rik	0	0	0	0	0	3.79628
4930546C10Rik	0	0	0	0	0	0
4930547E08Rik	0	0	0	0	0	0
4930547M16Rik	6.55686	4.50229	4.32628	8.47961	7.34022	7.59256
4930548G14Rik	0	0	0	0	0	0
4930548H24Rik	42.3216	9.64777	21.6314	18.8436	32.1135	26.574
4930548K13Rik	0	0	0	0	0	0
4930549C01Rik	0	0	0	0	0.917527	0
4930550C14Rik	12.5176	23.7978	20.7662	18.8436	13.7629	17.716
4930550C17Rik	0	0	0	0	0	0
4930550L24Rik	0	0	0	0	0.917527	1.26543
4930551L18Rik	0	0.643184	0	0.942179	3.67011	0
4930551O13Rik	0	0.643184	0	0	0	0
4930552N02Rik	0	0	0	0	0	0
4930552P12Rik	0.596078	0.643184	0	0	0.917527	1.26543
4930553I04Rik	0	0	0	0	0	0
4930553M12Rik	0	0	0	0	0	0
4930553P18Rik	0	0.643184	0	0	0	0
4930554C24Rik	0	0	0	0	0	0
4930554G22Rik	0	0	0	0	0	0
4930554G24Rik	0	0	0	0	0	0
4930554H23Rik	0	0	0	0	0	0
4930555A03Rik	2.98039	5.78866	4.32628	2.82654	0.917527	1.26543
4930555B11Rik	0	0	0	0	0	0
4930555B12Rik	0	0	0	0	0	0
4930555F03Rik	0.596078	0	0	0.942179	1.83505	2.53085
4930555G01Rik	0	0	0	0	0	0
4930555K19Rik	0	0	0	0	0	0
4930555M17Rik	0	0	0	0	0	0
4930555O08Rik	0	0	0	0	0	0
4930556G01Rik	0	0	0	0	0.917527	0
4930556G22Rik	1.19216	0	0.865257	0	0	2.53085
4930556I23Rik	0	0	0	0	0	0
4930556J24Rik	2.38431	2.57274	0.865257	3.76872	2.75258	3.79628
4930556L07Rik	0	0	0	0	0	0
4930556M19Rik	90.6039	87.4731	118.54	47.1089	51.3815	45.5554
4930556N13Rik	0	0	0	0	0	0
4930557A04Rik	0	0	0	0	0	0
4930557B06Rik	0	0	0	0	0	0
4930557F10Rik	0	0	0	0	0	0
4930557J02Rik	0	0	0	0	0	0
4930558C23Rik	0	0	0	0	0	0
4930558F17Rik	0	0	0	0	0	0
4930558G05Rik	0	0	0	0	0	0
4930558J18Rik	33.3804	18.6523	25.9577	22.6123	28.4433	25.3085
4930558J22Rik	0	0	0	0	0	0
4930558K02Rik	0	0	0	0	0	0
4930558N11Rik	0	0	0	0	0	0
4930560O18Rik	0	0	0	0	0	0
4930562A09Rik	0	0	0	0	0	0
4930562C15Rik	0	0.643184	2.59577	1.88436	2.75258	0
4930562D21Rik	0	0	0	0	0	0
4930562F07Rik	0.596078	1.92955	1.73051	0.942179	0.917527	1.26543
4930562F17Rik	0	0	0	0	0	0
4930563D23Rik	0	0	0	0	0	1.26543
4930563E18Rik	0	0.643184	0	0	0.917527	0
4930563E22Rik	8.94118	16.7228	20.7662	3.76872	8.25775	8.85799
4930563F08Rik	0	0	0	0	0	0
4930563H07Rik	0	0	0	0	0	0
4930563I02Rik	0	0	0	0	0	0
4930563M21Rik	0	0	0	0	0	0
4930564D02Rik	0	0	0	3.76872	2.75258	0
4930565D16Rik	0	0	0	0	0	0
4930565N06Rik	0	0	0	0	0	0
4930566F21Rik	0	0	0	0	0	2.53085
4930566N20Rik	0	0	0	0	0	0
4930567H17Rik	0	0	0	0	0	0
4930568A12Rik	0	0	0	0	0	0
4930568D16Rik	0	0	0	0	0	0
4930568G15Rik	0	0	0	0	0	0
4930569F06Rik	0	0	0	0	0	0
4930570D08Rik	0	0	0	0	0	0
4930570G19Rik	2.38431	1.28637	1.73051	0.942179	0	3.79628
4930570N18Rik	0	0	0	0	0	0
4930571K23Rik	0	0	0	0	0	0
4930571N24Rik	0	0	0	0	0	0
4930572K03Rik	0	0	0	0	0	0
4930572O03Rik	2.38431	0	0	0	0.917527	1.26543
4930573C15Rik	0	0	0	0	0	0
4930573I07Rik	0	0	0	0	0	0
4930577H14Rik	0	0	0	0	0	0
4930577N17Rik	13.7098	7.71821	9.51782	9.42179	5.50516	5.06171
4930578C19Rik	0	0	0	0	0	0
4930578G10Rik	0	0	0	0	0	0
4930578I06Rik	0	0	0	0	0.917527	1.26543
4930578I07Rik	0	0	0	0	0	0
4930578M01Rik	0.596078	0.643184	0	0.942179	0.917527	2.53085
4930579C12Rik	1.78824	1.28637	0.865257	25.4388	20.1856	21.5123
4930579D09Rik	0	0	0	0	0	0
4930579F01Rik	0	0	0	0	0	0
4930579G18Rik	2.38431	2.57274	3.46103	4.71089	2.75258	2.53085
4930579G24Rik	382.086	466.952	455.125	150.749	164.237	161.975
4930579H20Rik	0	0	0	0	0	0
4930579K19Rik	4.76863	9.64777	2.59577	2.82654	1.83505	2.53085
4930579M01Rik	0	0	0	0	0	0
4930579O11Rik	0	0	0	0	0	0
4930580E04Rik	0	0	0	0	0	0
4930581F22Rik	112.659	93.9049	107.292	70.6634	74.3197	82.2528
4930583I09Rik	0	1.28637	0	0	1.83505	0
4930583K01Rik	0	0	0.865257	0.942179	0	1.26543
4930583P06Rik	0	0	0	0	0	0
4930584F24Rik	0	0	0	0	0	0
4930586N03Rik	0	0	0	0	0	0
4930587A21Rik	0	0	0	0	0	0
4930588G17Rik	0	0	0	0	0	0
4930588K23Rik	0	0	0	0	0	0
4930589L23Rik	0	0	0	0	0	0
4930589O11Rik	5.36471	0.643184	3.46103	6.59525	4.58764	10.1234
4930589P08Rik	0	0	0	0	0	0
4930590H14Rik	0	0	0	0	0	0
4930590J08Rik	4.17255	4.50229	4.32628	1.88436	2.75258	2.53085
4930590L14Rik	0	0	0	0	0	0
4930590L20Rik	0	0	0	0	0	0
4930591A17Rik	0	0	0	0	0	0
4930593A02Rik	1.78824	1.92955	0	1.88436	0	2.53085
4930593C16Rik	0	0	0	0	0	0
4930594C11Rik	3.57647	1.28637	2.59577	2.82654	3.67011	0
4930594M17Rik	0	0	0	0	0	0
4930594M22Rik	20.2667	6.43184	9.51782	29.2075	44.9588	22.7777
4930594O21Rik	0	0	0	0	0	0
4930595D18Rik	0	0	0	0	0	0
4930595M18Rik	0	0	0	0	0	0
4930595O18Rik	0	0	0	0	0	0
4930596D02Rik	0	0	0	0	0	0
4930596I21Rik	0.596078	0.643184	0.865257	0.942179	0	1.26543
4930597A21Rik	0	0	0	0	0	0
4930597L12Rik	0	0	0	0	0	0
4930597O21Rik	0	0	0	0.942179	0.917527	5.06171
4930598A11Rik	0	0	0	0	0	0
4930598F16Rik	0	0	0	0	0	0
4930598N05Rik	0	0	0	0	0	0
4930599A14Rik	0	0	0	0	0	0
4930599N23Rik	0	2.57274	0.865257	1.88436	1.83505	6.32714
4930599N24Rik	0	0	0	0	0	0
4931400O07Rik	0	0	0	0	0	0
4931403E22Rik	1.19216	2.57274	2.59577	0.942179	0.917527	2.53085
4931403G20Rik	0	0.643184	0	1.88436	2.75258	1.26543
4931403M11Rik	0	0	0	0	0	0
4931406B18Rik	0	0	0	0	0	0
4931406C07Rik	693.835	1607.32	1538.43	509.719	488.125	523.887
4931406G06Rik	0	0.643184	0.865257	0	0	0
4931406P16Rik	776.094	731.301	744.986	1106.12	1201.04	1185.71
4931408C20Rik	0	0.643184	0.865257	0	0	0
4931409K22Rik	0	0.643184	0	0	0.917527	1.26543
4931412I15Rik	0	0	0	0	0	0
4931413I07Rik	0	0	0	0.942179	0	2.53085
4931413K12Rik	0	0	0	0	0	0
4931414P19Rik	145.443	178.805	136.711	102.698	111.938	125.277
4931415C17Rik	1.19216	1.92955	0	0	0.917527	0
4931417E11Rik	0	0	0	0	0	0
4931419H13Rik	0	0	0	0	0	0
4931422A03Rik	0	0	0	0	0	0
4931423N10Rik	1.78824	1.28637	0	3.76872	3.67011	1.26543
4931428F04Rik	351.686	166.585	256.981	297.729	287.186	288.517
4931428L18Rik	0	0	0	0	0	0
4931429L15Rik	0	0	0	0	0	0
4931429P17Rik	0	0	0	0	0	0
4931431B13Rik	0	0	0	3.76872	1.83505	1.26543
4931431C16Rik	0	1.28637	0	0	0	0
4931431F19Rik	0	0	0	0	0	0
4931440F15Rik	1.19216	0	0	0.942179	0.917527	1.26543
4931440J10Rik	0.596078	0.643184	0	0.942179	0	2.53085
4931440P22Rik	16.0941	10.9341	6.92205	20.7279	22.0207	25.3085
4932411E22Rik	0	0	0.865257	0	0	0
4932411K12Rik	0.596078	0	0	0	0	0
4932411N23Rik	0	0	0	0	0	0
4932412D23Rik	0	0	0	0	0	0
4932413F04Rik	0	0	0	0	0	0
4932414J04Rik	0	0	0	0	0	0
4932414N04Rik	0	0	0	0	0	0
4932415D10Rik	0.596078	0	0	0	0	0
4932415M13Rik	0	0	0	0	0	0
4932416K20Rik	0	0	0	0	0	0
4932422M17Rik	16.6902	4.50229	6.92205	10.364	9.17527	13.9197
4932429P05Rik	0	0	0	0	0	0
4932430I15Rik	0	0	0	0	0	0
4932431L22Rik	0	0	0	0	0	0
4932431P20Rik	0	0	0	1.88436	0.917527	0
4932435O22Rik	0	0	0	0	0	0
4932438A13Rik	1310.78	2156.6	2038.54	1174.9	1293.71	1242.65
4932438H23Rik	5.96078	2.57274	4.32628	1.88436	0.917527	1.26543
4932441J04Rik	17.8824	12.2205	11.2483	32.0341	23.8557	15.1851
4932442E05Rik	0.596078	0	0.865257	0	0	0
4932443I19Rik	0	1.28637	0	0	0	0
4932443L11Rik	0.596078	0	0	0	0	0
4932702P03Rik	0.596078	0	0	0	0	0
4933400A11Rik	0	0	0	0	0	0
4933400C23Rik	0	0	0	0	0	0
4933400F21Rik	3.57647	1.28637	1.73051	0	1.83505	1.26543
4933401B06Rik	0	0	0	0	0	0
4933401H06Rik	0	0	0	0	0	0
4933401J01Rik	0	0	0	0	0	0
4933402C05Rik	0	0	0	0	0	0
4933402C06Rik	0	0	0	0	0	0
4933402D24Rik	0	0	0	0	0	0
4933402E13Rik	0	0	0	0	0	0
4933402J07Rik	0	0	0	0	0	0
4933402J10Rik	0	0	0	0	0	0
4933402N03Rik	0	0	0	0	0	0
4933402N22Rik	0	0	0	0	0	1.26543
4933402P03Rik	0	0	0	0	0	0
4933403L11Rik	0	0	0	0	0	1.26543
4933403O08Rik	0	0	0	0	0	0
4933404I11Rik	0	0	0	0	0	0
4933404K08Rik	0	0	0	0	0	0
4933404O12Rik	46.4941	77.1821	55.3764	36.745	39.4537	45.5554
4933405D12Rik	1.78824	0.643184	0	1.88436	0	0
4933405E24Rik	0	2.57274	0	0.942179	0.917527	0
4933405L10Rik	0.596078	1.28637	1.73051	0	0	2.53085
4933405O20Rik	0	0	0	0	0	0
4933406C10Rik	1.78824	1.92955	0.865257	0.942179	3.67011	2.53085
4933406D12Rik	0	0	0	0	0	0
4933406F09Rik	0	0	0	0	0	0
4933406G16Rik	0	0	0	0	0	0
4933406I18Rik	5.36471	3.21592	7.78731	1.88436	0	2.53085
4933406J10Rik	0	0	0	0	0	0
4933406K04Rik	0	0	0	0	0	0
4933406L23Rik	0	0	0	0	0	0
4933406M09Rik	0	0	0	0	0	0
4933406P04Rik	6.55686	3.21592	0	2.82654	3.67011	2.53085
4933407E24Rik	0	0	0	0	0	0
4933407I08Rik	0	0	0	0	0	0
4933407K13Rik	157.365	33.4456	74.4121	40.5137	40.3712	59.4751
4933407L21Rik	0	0	0	0	0	0
4933408A14Rik	0	0	0	0	0	0
4933408B17Rik	20.8627	2.57274	12.9789	5.65307	3.67011	5.06171
4933408J17Rik	2.38431	3.21592	0.865257	2.82654	6.42269	2.53085
4933408N05Rik	0	0	0	0	0	0
4933409D19Rik	0	0	0	0	0	0
4933409G03Rik	0	0	0	0.942179	0	0
4933411E06Rik	0	0	0	0	0	0
4933411G06Rik	0	0	0	0	0	0
4933411K16Rik	0.596078	0	0	0.942179	0	0
4933411O13Rik	0	0	0	0	0	0
4933412A08Rik	1.19216	0	2.59577	2.82654	0.917527	1.26543
4933412E24Rik	0	0	0	0	0	0
4933412L11Rik	0	0	0	0.942179	0	0
4933413C19Rik	0	1.28637	0	0.942179	1.83505	1.26543
4933413G19Rik	1.78824	1.92955	0.865257	1.88436	1.83505	5.06171
4933413J09Rik	0	0	0	0	0	0
4933413L06Rik	0	0	0	0	0	0
4933414I15Rik	0	0	0	0	0	0
4933415A04Rik	0	0	0	0	0	0
4933415F23Rik	0	0	0	0	0	0
4933415J04Rik	0	0	0	0	0	0
4933416C03Rik	0	0	0	0	0	0
4933416E03Rik	0	0	0	0	0	0
4933416E14Rik	0	0	0	0	0	0
4933416I08Rik	0	0	0	0	0	0
4933416M07Rik	0	0	0	0	0	0
4933417A18Rik	0	0	0	0	0	0
4933417C20Rik	2.98039	1.92955	2.59577	0.942179	1.83505	2.53085
4933417D19Rik	0	0	0	0	0	0
4933417E11Rik	5.96078	10.291	4.32628	1.88436	1.83505	1.26543
4933417G07Rik	1.19216	0.643184	0	0.942179	2.75258	0
4933417O13Rik	0	0	0	0	0	0
4933421A08Rik	0	0	0	0	0	0
4933421I07Rik	0	0	0	0	0	0
4933421O10Rik	44.1098	37.9479	35.4755	36.745	32.1135	43.0245
4933423L19Rik	0	0	0	0	0	0
4933423P22Rik	0	0	0	0	0.917527	0
4933424G06Rik	1.19216	0.643184	1.73051	0	0.917527	0
4933424H11Rik	0	0	0	0	0	0
4933424L21Rik	0	0	0	0	0	0
4933424M12Rik	0	0	0	0	0	0
4933424N20Rik	0	0	0	0	0	0
4933425D22Rik	2.98039	1.92955	3.46103	0.942179	0	0
4933425L06Rik	0	0	0	0	0	0
4933425M03Rik	0	0	0.865257	0	0.917527	0
4933426K07Rik	0	0	0	0	0	0
4933427D06Rik	0.596078	0	0	1.88436	3.67011	0
4933427D14Rik	777.882	666.339	737.199	679.311	699.156	671.942
4933427E11Rik	1.78824	1.28637	1.73051	2.82654	3.67011	2.53085
4933427E13Rik	0	0	0	0	0	0
4933427G23Rik	1.19216	4.50229	1.73051	0	2.75258	0
4933427I04Rik	0	0	0	0	0	0
4933427I22Rik	0	0	0	0	0	0
4933427J07Rik	0	0	0	0	0	0
4933428C19Rik	0	0	0	0	0	0
4933428G20Rik	0	0.643184	0	0.942179	0.917527	1.26543
4933428M09Rik	0	0	0	0	0	0
4933428P19Rik	1.19216	1.92955	0	0	2.75258	0
4933429H19Rik	2.38431	3.21592	4.32628	4.71089	7.34022	3.79628
4933430H06Rik	0	0	0	0	0	0
4933430H16Rik	0	0	0	0	0	0
4933430I17Rik	6.55686	7.71821	12.1136	14.1327	11.9279	7.59256
4933430L12Rik	0.596078	0	0	0.942179	0.917527	0
4933430M04Rik	0	0	0	0	0	0
4933430N04Rik	0	0	0	0	0	0
4933431C10Rik	0	0	0	0	0	0
4933431E20Rik	53.6471	51.4548	63.1637	27.3232	16.5155	18.9814
4933431G14Rik	0	0	0	0	0	0
4933431K14Rik	26.2274	21.8683	17.3051	18.8436	11.0103	7.59256
4933431K23Rik	1.78824	1.92955	3.46103	0.942179	0	0
4933431M02Rik	0	0	0	0	0	0
4933432K03Rik	0	0	0	0.942179	0	0
4933433F19Rik	0	0	0	0	0	0
4933433G15Rik	8.94118	15.4364	11.2483	10.364	13.7629	7.59256
4933434E20Rik	1307.8	1299.23	1334.23	2042.64	2074.53	1991.78
4933434M16Rik	0	0	0	0	0	0
4933435F18Rik	0	0	0	0	0	0
4933435G04Rik	0	0	0	0	0	0
4933436E23Rik	0	0	0	0	0	0
4933436F18Rik	0	0	0	0	0	0
4933436H12Rik	0	0	0	0	0	0
4933436I01Rik	0	0	0	0	0	0
4933436I20Rik	0	0	0	0	0.917527	0
4933437G19Rik	5.96078	3.21592	1.73051	0.942179	0	2.53085
4933438A12Rik	0	0	0	0	0	0
4933438B17Rik	0	0	0	0	0	0
4933438K21Rik	0	0	0	0	0	0
4933439C10Rik	118.024	68.1775	69.2205	46.1668	55.9692	49.3517
4933439J24Rik	0	0	0	0	0	0
4933439K11Rik	0	0	0	0	0	0
4933439N06Rik	0	0	0	0	0	0
4933440J02Rik	0	0	0	0	0	0
4933440M02Rik	0	0	0	0	0	0
4933440N22Rik	16.0941	12.8637	11.2483	9.42179	8.25775	8.85799
5031410I06Rik	1.78824	0	0.865257	1.88436	0	0
5031414D18Rik	7.15294	13.5069	12.9789	7.53743	11.9279	21.5123
5031415H12Rik	7.15294	8.3614	7.78731	11.3061	13.7629	11.3888
5031425E22Rik	258.698	198.744	263.038	121.541	108.268	111.358
5031425F14Rik	2.98039	0	0.865257	0	0	0
5031434C07Rik	0	0	0	0	0	0
5031434O11Rik	13.7098	18.6523	12.1136	2.82654	3.67011	8.85799
5031439G07Rik	1911.62	1944.35	1802.33	3397.5	3241.62	3302.77
5033403F01Rik	8.94118	10.9341	8.65257	11.3061	11.0103	10.1234
5033403H07Rik	0	0	0	0	0	0
5033404E19Rik	0	0	0	0	0	0
5033417F24Rik	0.596078	0	0	0.942179	1.83505	1.26543
5033423K11Rik	0	0	0	0	0	0
5033426O07Rik	0	0	0	0	0	0
5033428I22Rik	4.17255	0	0	2.82654	2.75258	2.53085
5033430I15Rik	86.4314	38.5911	35.4755	16.9592	32.1135	20.2468
5330406M23Rik	0.596078	0	0.865257	0	0	0
5330411J11Rik	0	0	0	0	0	2.53085
5330411O13Rik	0	0	0	0	0	0
5330413D20Rik	0	0	0	0	0	0
5330413P13Rik	0	0	0	0	0	0
5330416C01Rik	0	0	0	0	0	0
5330417C22Rik	1.19216	0	0	0.942179	0	0
5330417H12Rik	0	0	0	0	0	0
5330425B07Rik	0.596078	1.92955	4.32628	0	4.58764	2.53085
5330426L24Rik	0	0	0	0	0	0
5330429C05Rik	0	0	0	0	0	0
5330434G04Rik	0	0	0	0	0	0
5330437M03Rik	0	0	0	0	0	0
5330438D12Rik	19.6706	25.0842	25.0924	10.364	10.0928	5.06171
5330438I03Rik	0	0	0	0	0	0
5330439A09Rik	0	0	0	0	0	0
5330439B14Rik	0	0	0	0	0	0
5330439K02Rik	1.19216	1.92955	0	0	0	0
5430400D12Rik	2.38431	0.643184	0.865257	0	0.917527	0
5430401F13Rik	0	0	0	0	0	0
5430402E10Rik	0	0	0	0	0	0
5430402O13Rik	1.19216	5.14548	1.73051	5.65307	1.83505	0
5430403G16Rik	14.902	40.5206	45.8586	16.9592	19.2681	26.574
5430405H02Rik	48.8784	43.7365	42.3976	55.5886	41.2887	55.6788
5430416N02Rik	653.302	198.101	341.776	720.767	622.083	607.405
5430416O09Rik	0	0.643184	0	0	0	0
5430419D17Rik	0	1.28637	0	0	0.917527	0
5430420F09Rik	1.19216	0	0	0	0	0
5430427M07Rik	0	0	0	0	0	0
5430427N15Rik	0.596078	1.92955	0.865257	0.942179	0	1.26543
5430427O19Rik	0	1.92955	1.73051	1.88436	0.917527	0
5430433H01Rik	0	0	0	0	0	0
5430434F05Rik	0.596078	0	0	0	0	0
5430434I15Rik	0	0	0	0	0	0
5530400C23Rik	0	0	0	0	0	0
5530400K19Rik	0	0	0	0	0	0
5530401A14Rik	0	0	0	0	0	0
5530601H04Rik	207.435	127.351	160.938	155.46	159.65	136.666
5730403I07Rik	0	0	0.865257	0	0.917527	0
5730405O15Rik	4.17255	4.50229	4.32628	1.88436	2.75258	2.53085
5730408A14Rik	0	0	0	0	0	0
5730409E04Rik	209.82	444.44	374.656	257.215	239.475	240.431
5730412P04Rik	0	0	0	0	0	0
5730416F02Rik	0.596078	0	0.865257	0	0	0
5730419F03Rik	0	0	0	0	0	0
5730420D15Rik	0.596078	0	0	0	0	0
5730422E09Rik	1.78824	1.28637	0.865257	2.82654	0	0
5730435O14Rik	0	0	0	0	0	0
5730437C11Rik	0	0	0	0	0	0
5730455P16Rik	660.455	997.579	965.627	881.879	975.331	917.435
5730460C07Rik	0	0	0	0	0	0
5730480H06Rik	239.027	183.308	213.718	256.273	289.021	269.536
5730488B01Rik	0	0	0	0	0	0
5730507A11Rik	0	0	0	0	0	0
5730507C01Rik	1.78824	1.28637	0.865257	0.942179	2.75258	2.53085
5730508B09Rik	19.0745	34.732	35.4755	28.2654	22.9382	27.8394
5730522E02Rik	0	0	0	0	0	0
5730559C18Rik	0.596078	0	0	1.88436	0	1.26543
5730585A16Rik	0	0	0	0	0	0
5730596B20Rik	0	0	0	0	0.917527	1.26543
5830405F06Rik	0	0	0	0	0	0
5830411K02Rik	0	0	0	0	0	0
5830411N06Rik	0	1.92955	0.865257	0	0	0
5830415G21Rik	0	0	0	0	0	0
5830416I19Rik	0	0	0	0	0	0
5830417I10Rik	463.749	500.397	533.863	481.453	534.001	454.288
5830418P13Rik	1.19216	0	1.73051	0	0	0
5830432E09Rik	29.2078	27.6569	36.3408	43.3402	34.866	37.9628
5830437K03Rik	0	0	0	0	0	0
5830444B04Rik	51.8588	93.2617	84.7952	30.1497	30.2784	44.29
5830444F18Rik	0	0	0	0	0	0
5830454E08Rik	4.76863	6.43184	0.865257	0	3.67011	1.26543
5830462I19Rik	0.596078	2.57274	0	0.942179	2.75258	2.53085
5830468F06Rik	0	0	0	0	0	0
5830473C10Rik	1.78824	2.57274	0.865257	1.88436	0.917527	2.53085
5830487J09Rik	2.38431	0.643184	1.73051	0	0.917527	0
5930403N24Rik	3.57647	10.9341	5.19154	3.76872	0.917527	2.53085
5930409G06Rik	0	0	0	0.942179	0.917527	0
5930412G12Rik	0	0	0	0	0	0
5930420M18Rik	16.0941	9.00458	23.3619	5.65307	0.917527	3.79628
5930422O12Rik	1.78824	0.643184	2.59577	0	0.917527	1.26543
5930430L01Rik	70.3372	55.957	59.7027	67.8369	63.3094	56.9442
5930435M05Rik	0	0	0	0	0	0
6030400A10Rik	1.19216	0.643184	0	0.942179	0	1.26543
6030407O03Rik	0	0	0	0	0	0
6030408B16Rik	0	0	0	0	0	1.26543
6030419C18Rik	94.7765	248.269	154.016	227.065	182.588	160.709
6030442E23Rik	0	0	0	0	0	0
6030442K20Rik	8.94118	3.85911	6.0568	4.71089	4.58764	7.59256
6030443J06Rik	16.6902	14.1501	19.9009	32.0341	33.031	35.432
6030445D17Rik	5.96078	1.92955	3.46103	3.76872	5.50516	1.26543
6030452D12Rik	0	0	0	0	0	0
6030458C11Rik	516.204	311.301	400.614	457.899	457.846	498.578
6030460B20Rik	0.596078	1.28637	0	0	0	0
6030468B19Rik	0	0	0	0	0	0
6030469F06Rik	0	0	0	0	0	0
6030471H07Rik	0	0	0	0	0	0
6030498E09Rik	0	0	0	0	0	1.26543
6230400D17Rik	25.6314	23.1546	27.6882	47.1089	35.7836	35.432
6330403K07Rik	0.596078	0	0	0	0	0
6330403L08Rik	187.169	219.326	201.605	93.2757	94.5053	108.827
6330403N20Rik	0	0.643184	2.59577	0	0	0
6330408A02Rik	198.494	281.715	266.499	175.245	186.258	198.672
6330409D20Rik	0	0	0	0	0	0
6330410L21Rik	0	0	0	0	0	0
6330415B21Rik	0	0	0	0	0	0
6330418K02Rik	37.5529	30.8729	26.823	32.9763	30.2784	37.9628
6330419E04Rik	0	0	0	0	0	0
6330549D23Rik	15.498	13.5069	16.4399	27.3232	31.1959	22.7777
6330562C20Rik	37.5529	19.9387	32.8798	26.381	22.9382	20.2468
6430500D05Rik	0	0	0	0	0	0
6430503K07Rik	1.78824	1.28637	2.59577	2.82654	1.83505	3.79628
6430511E19Rik	14.902	12.2205	13.8441	2.82654	9.17527	7.59256
6430531B16Rik	0	0.643184	0	1.88436	0	0
6430548M08Rik	95.9686	268.851	218.045	326.936	321.135	294.845
6430550D23Rik	8.94118	10.291	4.32628	8.47961	10.0928	11.3888
6430562O15Rik	23.8431	17.366	15.5746	4.71089	5.50516	6.32714
6430571L13Rik	5.96078	9.64777	3.46103	11.3061	7.34022	5.06171
6430573F11Rik	0	0	0	0	0	0
6430573P05Rik	1.78824	5.14548	2.59577	5.65307	0.917527	1.26543
6430584L05Rik	0	0	0	0	0	0
6430590A07Rik	1.19216	0	0.865257	0.942179	0.917527	2.53085
6430628N08Rik	0	0	0	0	0	0
6430710C18Rik	0	0	0	0	0	0
6530401F13Rik	1.19216	0.643184	0.865257	0.942179	0	0
6530402F18Rik	19.6706	23.1546	22.4967	69.7212	54.1341	77.1911
6530403H02Rik	0	0	0	0	0	0
6530409C15Rik	0	0	0.865257	0	0	0
6530411M01Rik	0	0	0	0	0	0
6530437J22Rik	0.596078	1.28637	0	1.88436	2.75258	1.26543
6720427I07Rik	54.2431	38.5911	38.9366	6.59525	11.0103	8.85799
6720464F23Rik	1.19216	1.28637	0	0	0.917527	0
6720469O03Rik	0	0	0	0	0	0
6720475M21Rik	1.19216	0	0	0	0	0
6720482G16Rik	0	0	0	0	0	0
6720483E21Rik	1.19216	2.57274	0.865257	0	0	0
6720489N17Rik	112.659	86.1867	111.618	50.8777	53.2166	51.8825
6820402A03Rik	0.596078	0	0	0	0	1.26543
6820408C15Rik	1.19216	0	0	0	0	0
6820431F20Rik	155.576	120.275	158.342	325.994	324.805	359.381
7330404K18Rik	0.596078	0	0	0	0	0
7330423F06Rik	5.36471	0	1.73051	0.942179	0	1.26543
7420426K07Rik	0	0	0	0	0	0
7420461P10Rik	0.596078	0	0.865257	0	0	0
7530416G11Rik	0	0	0	0	0	0
7530428D23Rik	0	0	0	0	0	0
7630403G23Rik	0	0	0	0	0	0
7SK	0	0	0	0	0	0
8030411F24Rik	0	0	0	0	0	0
8030423F21Rik	0	0	0	0	0	0
8030423J24Rik	0	0	0	0	0	0
8030442B05Rik	0	0	0	0	0	0
8030443G20Rik	0	0	0	0	0	0
8030445P17Rik	0	0	0	0	0	0
8030451A03Rik	1.19216	3.85911	8.65257	36.745	33.9485	35.432
8030453O22Rik	0	1.28637	0	0	0	0
8030462N17Rik	473.882	476.6	476.756	1001.54	1114.8	1025
8030474K03Rik	0	0	0	0	0	0
8030487O14Rik	0	0	0	0	0	0
8430408G22Rik	0	0	0	0	0	0
8430419K02Rik	1.19216	0	0.865257	0	0	1.26543
8430422M14Rik	1.19216	0	1.73051	0	0	1.26543
8430423G03Rik	23.8431	16.7228	14.7094	40.5137	33.9485	31.6357
8430429K09Rik	90.0078	51.4548	67.49	180.898	191.763	231.573
8430432A02Rik	1.19216	4.50229	0.865257	0	0	0
8430436N08Rik	0	0	0	0	0	0
8430437L04Rik	0	0	0	0	0	0
9030204H09Rik	0	0	0	0	0	0
9030407P20Rik	32.1882	39.8774	36.3408	24.4967	18.3505	30.3703
9030612E09Rik	0.596078	0	0	0	0	0
9030616G12Rik	0	0	0	0	0	0
9030617O03Rik	2117.87	2959.29	2766.23	2970.69	2931.5	3095.24
9030619P08Rik	0	0	0	0	0	0
9030622O22Rik	0	0	0	0	3.67011	0
9030624G23Rik	2.38431	0.643184	3.46103	0.942179	0.917527	1.26543
9030624J02Rik	1510.46	2273.66	2143.24	2059.6	2092.88	2157.55
9130008F23Rik	119.216	70.1071	77.0078	332.589	351.413	353.054
9130011E15Rik	580.58	961.561	807.285	900.723	931.29	947.805
9130015G15Rik	1.19216	0	0	0	0.917527	0
9130015L21Rik	0	0	0	0	0	0
9130017K11Rik	0	0	0	0	0	0
9130019O22Rik	64.9725	60.4593	52.7807	81.0274	91.7527	83.5182
9130019P16Rik	0	0	0	0	0	0
9130023H24Rik	97.7568	71.3935	97.774	127.194	130.289	94.907
9130024F11Rik	20.8627	23.7978	15.5746	8.47961	7.34022	6.32714
9130204K15Rik	0.596078	0	0	0	0	0
9130204L05Rik	0	0	0	0	0	0
9130208D14Rik	0	0.643184	0	0	4.58764	3.79628
9130213A22Rik	1.78824	4.50229	5.19154	0.942179	1.83505	0
9130221F21Rik	0	0	0	0	0	0
9130221H12Rik	169.882	191.026	144.498	118.715	126.619	142.993
9130227L01Rik	0	0	0	0	0.917527	0
9130230L23Rik	1.19216	0.643184	1.73051	2.82654	1.83505	1.26543
9130230N09Rik	2.38431	1.28637	3.46103	16.9592	7.34022	8.85799
9130401M01Rik	298.039	201.317	178.243	270.405	231.217	226.511
9130409I23Rik	0.596078	0	4.32628	0	0.917527	0
9130409J20Rik	0	0	0	0	0	0
9130410C08Rik	0	0	0	0	0	0
9130604C24Rik	2.98039	4.50229	4.32628	4.71089	3.67011	2.53085
9230009I02Rik	0	0	0	0	0	0
9230019H11Rik	0	0	0	0	0	0
9230020A06Rik	0	0	0	0	0	0
9230102O04Rik	0	0	0	0	0	0
9230104L09Rik	0	0	0	0.942179	0	0
9230104M06Rik	1.19216	1.28637	0	0.942179	0	0
9230105E05Rik	0.596078	0.643184	0	0	0	0
9230106D20Rik	0	0	0	0	0	0
9230109A22Rik	0	0	0	0	0	0
9230110C19Rik	101.929	100.337	106.427	168.65	133.041	169.567
9230110F15Rik	0	0	0	0	0	0
9230111E07Rik	18.4784	6.43184	11.2483	0.942179	3.67011	0
9230112D13Rik	0	0	0	0	0	0
9230112E08Rik	56.0314	75.2526	69.2205	116.83	122.949	113.888
9230113P08Rik	0	0	0	0	0	0
9230114J08Rik	0	0	0	0	0	0
9230114K14Rik	46.4941	27.0137	40.6671	101.755	114.691	132.87
9230116N13Rik	13.1137	19.2955	19.0356	0.942179	2.75258	2.53085
9230117E06Rik	0	0	0	0	0	0
9330020H09Rik	31.5922	16.7228	17.3051	39.5715	31.1959	21.5123
9330102E08Rik	19.0745	28.9433	20.7662	33.9184	34.866	37.9628
9330104G04Rik	23.8431	30.8729	24.2272	20.7279	22.9382	15.1851
9330111N05Rik	2.38431	1.92955	2.59577	2.82654	13.7629	3.79628
9330118I20Rik	0	0	0	0	0	0
9330121J05Rik	0	0	0	0	0	0
9330132A10Rik	2.98039	5.78866	1.73051	4.71089	5.50516	8.85799
9330136K24Rik	4.76863	6.43184	4.32628	4.71089	7.34022	2.53085
9330151L19Rik	97.1608	72.0367	54.5112	21.6701	28.4433	22.7777
9330154J02Rik	17.2863	14.7932	25.0924	16.017	15.598	20.2468
9330154K18Rik	0.596078	0	0	0	0	0
9330158H04Rik	0	0	0	0	0	0
9330159F19Rik	9.53725	4.50229	7.78731	16.017	19.2681	8.85799
9330159M07Rik	48.2823	30.2297	41.5323	123.425	112.856	125.277
9330160F10Rik	5.96078	1.28637	1.73051	1.88436	0	3.79628
9330161L09Rik	3.57647	3.85911	2.59577	6.59525	3.67011	2.53085
9330162012Rik	1.19216	1.28637	1.73051	0.942179	0	0
9330162B11Rik	0	0	0	0	0	0
9330162G02Rik	10.1333	3.21592	6.92205	18.8436	17.433	8.85799
9330171B17Rik	0	0	0	0	0	0
9330175E14Rik	0	0	0	2.82654	4.58764	6.32714
9330175M20Rik	0	0	0	0.942179	0.917527	0
9330178D15Rik	0	0	0	0	0	0
9330179D12Rik	0	1.28637	0.865257	7.53743	3.67011	11.3888
9330182L06Rik	375.529	1615.68	1347.2	160.17	176.165	160.709
9330182O14Rik	0	0	0	0	0	0
9330185C12Rik	0	0	0	0	0	0
9330198N18Rik	1.78824	0	0	0	0	0
9430002A10Rik	24.4392	9.00458	12.9789	12.2483	15.598	11.3888
9430007A20Rik	0	0	0	0	0	0
9430007M09Rik	0	0	0	0	0	0
9430015G10Rik	1155.8	787.901	967.357	355.201	406.465	411.264
9430016H08Rik	407.122	497.825	436.089	568.134	622.083	559.319
9430018G01Rik	1.78824	0.643184	0	0.942179	0.917527	1.26543
9430020K01Rik	1826.98	8131.14	6669.4	2378.06	2393.83	2372.68
9430021M05Rik	0	0	0	0	0	0
9430024E24Rik	0	0	0	0	0	0
9430025C20Rik	2.38431	0	0.865257	0	0	0
9430034N14Rik	11.3255	6.43184	8.65257	10.364	10.0928	7.59256
9430037G07Rik	14.3059	10.291	12.9789	6.59525	7.34022	10.1234
9430037O13Rik	5.36471	7.07503	5.19154	2.82654	3.67011	2.53085
9430038I01Rik	54.8392	33.4456	38.0713	32.0341	27.5258	24.0431
9430041J12Rik	1.19216	0	0	0	0	0
9430053O09Rik	0	0	0	0	0	0
9430060I03Rik	0.596078	0.643184	0.865257	0	0	0
9430062P05Rik	7.74902	5.14548	12.1136	0.942179	2.75258	1.26543
9430064I24Rik	1.78824	0.643184	0	0.942179	0	0
9430065F17Rik	8.3451	4.50229	6.0568	15.0749	11.9279	3.79628
9430069I07Rik	0.596078	0	1.73051	0	0	0
9430073C21Rik	0	0	0	0	0	0
9430076C15Rik	193.129	454.731	377.252	249.677	268.835	260.678
9430083B18Rik	0	0	0	0	0	0
9430087B13Rik	0	0	0	0	0	0
9430087J23Rik	0	1.28637	0	0	0	0
9430091E24Rik	8.3451	9.64777	5.19154	4.71089	4.58764	1.26543
9430092D12Rik	0	0	0	0	0	0
9430093N23Rik	0	0	0	0	0	0
9430097D07Rik	0	0	0	0	0	0
9430098F02Rik	1.19216	0	1.73051	0	0.917527	1.26543
9530002B09Rik	0	0	0	0	0	0
9530003J23Rik	112.063	135.069	152.285	243.082	236.722	229.042
9530003O04Rik	0	0	0	0	0.917527	0
9530013L04Rik	0	0.643184	0	0	0	0
9530018H14Rik	0	0	0	0	0	0
9530022L04Rik	0	0	0	0	0	0
9530026F06Rik	0	0	0	0	0	0
9530026P05Rik	10.7294	12.8637	9.51782	0.942179	1.83505	1.26543
9530027J09Rik	0	4.50229	2.59577	1.88436	0	5.06171
9530034A14Rik	0	0	0	0	0	0
9530034E10Rik	0	0	0	1.88436	0.917527	1.26543
9530036M11Rik	0	0	0	0	0	0
9530036O11Rik	0	0	0	0	0	0
9530046B11Rik	0	0	0	0	0	0
9530051G07Rik	0	1.92955	1.73051	1.88436	1.83505	0
9530052C20Rik	2.98039	9.00458	7.78731	4.71089	9.17527	3.79628
9530052E02Rik	0	0.643184	0.865257	0	0	0
9530053A07Rik	70.3372	95.8345	89.9867	195.031	199.103	213.857
9530056K15Rik	4.76863	3.85911	1.73051	4.71089	3.67011	1.26543
9530059O14Rik	1.19216	0.643184	0	0	1.83505	0
9530062K07Rik	1.78824	7.71821	2.59577	5.65307	5.50516	1.26543
9530068E07Rik	7796.7	12792.3	11304.6	5209.31	5180.36	5416.03
9530077C05Rik	30.9961	99.0504	102.1	17.9014	20.1856	20.2468
9530078K11Rik	2.38431	0.643184	0	0	0	0
9530080O11Rik	0	0	0	0	0	0
9530082P21Rik	7.74902	12.8637	12.9789	1.88436	2.75258	3.79628
9530085L11Rik	11.9216	5.78866	5.19154	5.65307	3.67011	2.53085
9530085P06Rik	0	0	0	0	0	0
9530086O07Rik	1.19216	0	0	0	0	0
9530097N15Rik	0	0	0	0	0	0
9630001P10Rik	0	0	0	0	0	0
9630010A21Rik	2.38431	0	0	0	0	0
9630013D21Rik	17.8824	36.6615	35.4755	4.71089	8.25775	11.3888
9630013K17Rik	0	0	0	0	0	0
9630028B13Rik	0	0	0	0	0	0
9630028H03Rik	0	0	0	0.942179	0	0
9630041A04Rik	0	0	0	0	0	0
9830004L10Rik	0	0	0	0	0	0
9830107B12Rik	0	0	0	0.942179	0	0
[truncated: 46,827 more rows]

## Sheet: Extended Data Table 4
Extended Data Table 4: Differential expression of retroelements from RNA-seq analysis of YUMMER1.7 with Kdm5b sg vs Ctl
Sequence	log2FoldChange.sgKDM5B_vs_sgCtrl	padj.sgKDM5B_vs_sgCtrl	neglogp.sgKDM5B_vs_sgCtrl
(A)n	0.136847	0.516268	0.661128
(AAATG)n	-0.61385	0.825358	0.191938
(AACTG)n	-0.63943	0.268032	1.31665
(AAGTG)n	-2.7061	NA	NA
(AATAG)n	-4.09205	2.85499e-05	10.4639
(AATTG)n	0.568219	NA	NA
(ACATG)n	-0.154116	0.864092	0.146076
(ACCG)n	-0.0401342	0.970527	0.0299162
(ACCTG)n	-3.00865	0.110599	2.20185
(ACGTG)n	NA	NA	NA
(ACTAG)n	0.133049	0.927281	0.0754986
(ACTCG)n	1.06095	NA	NA
(ACTG)n	-0.220418	0.788558	0.237549
(ACTTG)n	NA	NA	NA
(AGATG)n	-0.0725373	0.976198	0.0240899
(AGCTG)n	0.0807248	0.921894	0.0813247
(AGGGGG)n	0.903467	6.03868e-08	16.6225
(AGGTG)n	-0.778241	0.266227	1.32341
(AGTAG)n	-0.351362	0.796463	0.227575
(AGTTG)n	2.02273	NA	NA
(ATAAG)n	0.5062	0.000406216	7.80863
(ATAGG)n	-0.266712	0.556409	0.586252
(ATATG)n	0.597928	0.518384	0.657039
(ATCTG)n	-1.52084	0.176132	1.73652
(ATG)n	-1.97752	7.4182e-12	25.6271
(ATGGTG)n	-1.13517	5.86758e-06	12.0461
(ATGTG)n	-1.57125	0.274877	1.29143
(ATTAG)n	1.77495	0.324215	1.12635
(ATTG)n	-0.414695	0.123546	2.09114
(ATTTG)n	-1.3057	0.178725	1.72191
(C)n	-0.0551393	0.890548	0.115919
(CA)n	0.044251	0.885378	0.121741
(CAA)n	0.277499	0.232355	1.45949
(CAAA)n	0.0563607	0.798615	0.224876
(CAAAA)n	0.560444	0.0283343	3.56368
(CAAAAA)n	0.206922	0.358523	1.02576
(CAAAC)n	-0.814125	0.00312833	5.76726
(CAAAG)n	-1.28931	0.0217228	3.82939
(CAAAT)n	-0.39363	0.56645	0.568366
(CAACC)n	0.120633	0.664521	0.408689
(CAACG)n	1.9844	0.294848	1.2213
(CAACT)n	NA	NA	NA
(CAAG)n	0.0996787	0.793212	0.231665
(CAAGA)n	0.877425	0.606322	0.500345
(CAAGC)n	-1.82004	0.370222	0.993653
(CAAGG)n	-0.0741304	0.948307	0.0530774
(CAAGT)n	NA	NA	NA
(CAAT)n	0.611316	0.000215657	8.44182
(CAATA)n	-0.457761	0.447945	0.803084
(CAATC)n	0.188072	NA	NA
(CAATG)n	1.43929	NA	NA
(CAATT)n	-0.781569	NA	NA
(CACAA)n	-2.03294	9.45015e-05	9.26689
(CACAC)n	-0.0754934	0.884079	0.123209
(CACAG)n	0.301917	0.0349619	3.3535
(CACAT)n	0.617983	0.0589194	2.83158
(CACCAT)n	0.822286	1.90637e-05	10.8677
(CACCC)n	0.115978	0.676212	0.391249
(CACCG)n	-0.284715	NA	NA
(CACCT)n	1.08507	0.069236	2.67023
(CACG)n	0.258418	0.18838	1.6693
(CACGA)n	NA	NA	NA
(CACGC)n	0.810774	0.00121236	6.71519
(CACGT)n	-0.385547	0.675635	0.392102
(CACTA)n	0.456226	0.21088	1.55647
(CACTC)n	-1.5649	0.00263557	5.93866
(CACTG)n	0.949421	0.000360242	7.92874
(CACTT)n	1.06095	NA	NA
(CAG)n	0.889795	7.08438e-07	14.1602
(CAGA)n	0.301497	0.0256911	3.66161
(CAGAA)n	-1.13141	0.0421523	3.16647
(CAGAC)n	-2.03421	0.274877	1.29143
(CAGAG)n	-0.876841	0.147882	1.91134
(CAGAGA)n	0.623614	0.000302507	8.1034
(CAGAT)n	NA	NA	NA
(CAGC)n	-0.449224	0.085201	2.46274
(CAGCC)n	0.559429	0.137955	1.98083
(CAGCG)n	0.605439	0.482185	0.729427
(CAGCT)n	-0.222703	0.817761	0.201185
(CAGG)n	0.163944	0.671363	0.398445
(CAGGA)n	-0.612523	0.0432411	3.14096
(CAGGC)n	0.965508	7.30879e-05	9.52385
(CAGGG)n	-0.243473	0.61506	0.486035
(CAGGT)n	-3.33795	0.0443793	3.11498
(CAGT)n	0.0608001	0.816161	0.203144
(CAGTA)n	0.889819	7.21815e-10	21.0493
(CAGTC)n	-0.510031	NA	NA
(CAGTG)n	-1.25394	0.00319604	5.74584
(CAGTT)n	-3.05773	0.00207932	6.17572
(CAT)n	1.54968	5.1762e-81	184.865
(CATA)n	0.522429	0.0401663	3.21473
(CATAA)n	1.06095	NA	NA
(CATAC)n	0.00439057	0.994122	0.00589564
(CATAG)n	-0.854171	0.587427	0.532004
(CATAT)n	-1.7053	0.445069	0.809526
(CATATA)n	0.751043	4.50497e-05	10.0077
(CATCC)n	0.735924	0.0337902	3.38758
(CATCG)n	-0.509411	NA	NA
(CATCT)n	-0.995333	0.566691	0.56794
(CATG)n	-0.649124	0.0511882	2.97225
(CATGC)n	0.374269	0.286616	1.24961
(CATGT)n	-1.45261	NA	NA
(CATTA)n	-0.763997	0.662705	0.411426
(CATTC)n	1.06095	NA	NA
(CATTG)n	NA	NA	NA
(CATTT)n	-0.338102	0.838281	0.176402
(CCA)n	0.502833	0.0367309	3.30414
(CCAA)n	-0.550479	0.0202617	3.89902
(CCCA)n	-0.569253	0.0931876	2.37314
(CCCCAA)n	0.173322	0.525876	0.642689
(CCCCAG)n	0.906082	0.000119078	9.03573
(CCCCCA)n	0.0107209	0.969577	0.0308954
(CCCCCG)n	0.0193472	0.969577	0.0308954
(CCCCCT)n	-0.0108504	0.976198	0.0240899
(CCCCG)n	0.952127	0.000644208	7.34749
(CCCG)n	1.31455	1.71212e-08	17.883
(CCCGA)n	NA	NA	NA
(CCCGAA)n	0.102326	0.955679	0.0453329
(CCCGG)n	1.27548	0.0748792	2.59188
(CCCTA)n	-3.27089	NA	NA
(CCCTAA)n	-0.50643	0.188323	1.6696
(CCCTAG)n	-1.16488	0.033211	3.40487
(CCCTG)n	-0.442603	0.293848	1.22469
(CCG)n	1.31791	0.000717374	7.23991
(CCGAA)n	1.09154	0.000861838	7.05644
(CCGAG)n	0.639694	0.000279591	8.18218
(CCGCG)n	0.520259	0.101303	2.28964
(CCGG)n	2.45105	NA	NA
(CCGGA)n	0.0991579	NA	NA
(CCGGG)n	0.777364	0.0316866	3.45186
(CCGTA)n	0.0991578	NA	NA
(CCTA)n	-0.587191	0.157582	1.84781
(CCTAA)n	-0.136162	0.927853	0.0748816
(CCTAG)n	-1.39715	0.460755	0.77489
(CCTAT)n	-0.509409	NA	NA
(CCTCG)n	0.83348	0.082899	2.49013
(CCTG)n	0.113342	0.581645	0.541894
(CCTTG)n	-0.274569	0.823721	0.193924
(CG)n	-0.798672	0.0358274	3.32904
(CGA)n	0.243825	0.192123	1.64962
(CGAA)n	-0.542323	0.784263	0.24301
(CGAAA)n	0.253127	0.893694	0.112391
(CGAAG)n	1.32045	0.0789702	2.53868
(CGAAT)n	NA	NA	NA
(CGAG)n	1.28636	7.57858e-06	11.7902
(CGAGA)n	NA	NA	NA
(CGAGG)n	0.474922	0.274877	1.29143
(CGAGT)n	NA	NA	NA
(CGAT)n	-1.25014	0.306935	1.18112
(CGATA)n	4.33675	0.000190745	8.56457
(CGATG)n	0.0991578	NA	NA
(CGCGG)n	1.44885	5.79715e-30	67.3202
(CGCTG)n	1.3054	0.0162588	4.11912
(CGG)n	1.25883	0.000162934	8.72216
(CGGA)n	0.661617	0.0041804	5.47735
(CGGAA)n	NA	NA	NA
(CGGAG)n	1.62509	4.41134e-06	12.3313
(CGGG)n	0.747351	0.140445	1.96294
(CGGGA)n	-1.9068	0.460372	0.775721
(CGGGG)n	1.17524	3.07201e-06	12.6932
(CGGGGG)n	1.43099	4.49398e-10	21.5231
(CGGT)n	-0.958814	0.471643	0.751532
(CGGTG)n	0.700513	0.0117921	4.44033
(CGTAG)n	NA	NA	NA
(CGTG)n	0.548962	0.00025391	8.27853
(CGTTG)n	1.53744	0.0202617	3.89902
(CTA)n	-0.493615	0.026062	3.64728
(CTAA)n	0.57993	0.324027	1.12693
(CTAAA)n	-5.13618	0.000393106	7.84143
(CTAAG)n	-2.07033	0.108682	2.21933
(CTAAT)n	-3.29041	0.0217228	3.82939
(CTACG)n	NA	NA	NA
(CTACT)n	-0.389436	0.891596	0.114742
(CTAG)n	-2.49966	0.307971	1.17775
(CTAGG)n	-1.3611	0.172105	1.75965
(CTAGGG)n	0.0916074	0.948848	0.0525065
(CTAGT)n	-0.25796	NA	NA
(CTATA)n	-1.02404	0.0969243	2.33383
(CTATG)n	-0.485058	0.620659	0.476974
(CTATT)n	0.038819	0.966092	0.0344958
(CTCA)n	0.710468	7.96691e-06	11.7402
(CTCCG)n	-0.149711	0.678912	0.387263
(CTCG)n	-1.7962	2.76318e-11	24.3121
(CTCGG)n	-0.169995	0.775679	0.254016
(CTCTG)n	0.905989	5.75369e-11	23.5786
(CTG)n	0.974263	0.000580753	7.45119
(CTGGGG)n	0.582359	0.0158897	4.14209
(CTGTG)n	-0.0896982	0.755155	0.280833
(CTTA)n	-1.00621	0.432173	0.83893
(CTTAA)n	NA	NA	NA
(CTTAG)n	0.0991578	NA	NA
(CTTAT)n	0.0991578	NA	NA
(CTTCG)n	NA	NA	NA
(CTTG)n	0.066395	0.854068	0.157745
(CTTTA)n	2.02273	NA	NA
(CTTTG)n	-0.442474	0.263067	1.33535
(G)n	2.15137	1.16458e-20	45.8993
(GA)n	0.0167943	0.967236	0.0333126
(GAA)n	1.08558	5.06037e-16	35.2199
(GAAA)n	-0.488041	0.0117341	4.44525
(GAAAA)n	0.187578	0.22674	1.48395
(GAATG)n	-0.874218	0.284451	1.25719
(GACTG)n	-3.09723	NA	NA
(GAGAA)n	-1.17229	1.19089e-07	15.9434
(GAGTG)n	0.529751	0.481814	0.730197
(GATTG)n	3.16263	NA	NA
(GCATG)n	-1.32505	0.30707	1.18068
(GCCTAA)n	0.537633	0.092361	2.38205
(GCCTG)n	-0.306182	0.286616	1.24961
(GCGTG)n	-0.263961	0.428909	0.846511
(GCTG)n	-0.727814	0.119877	2.12129
(GCTTG)n	-0.0258515	0.970527	0.0299162
(GGA)n	0.474832	0.0126058	4.3736
(GGAA)n	-0.126929	0.565813	0.569492
(GGAAA)n	-0.10438	0.71204	0.339621
(GGAGA)n	0.0559664	0.895827	0.110009
(GGAGAA)n	0.049912	0.883427	0.123947
(GGATG)n	0.781109	0.00186357	6.28526
(GGCTG)n	0.586575	0.00736273	4.91132
(GGGA)n	0.422104	0.0738139	2.60621
(GGGAA)n	0.0340458	0.961912	0.0388325
(GGGAGA)n	0.832939	8.78514e-06	11.6424
(GGGGA)n	-0.237507	0.337457	1.08632
(GGGTG)n	0.503362	0.015266	4.18213
(GGTTG)n	1.02807	0.0466409	3.06528
(GTATG)n	-0.388485	0.896063	0.109745
(GTCTG)n	0.389461	0.0589924	2.83035
(GTGTG)n	0.771754	3.51372e-07	14.8614
(GTTTG)n	-0.541609	0.00948073	4.65849
(T)n	0.395785	0.015266	4.18213
(TA)n	0.0821439	0.792812	0.232169
(TAA)n	0.281886	0.369639	0.99523
(TAAA)n	-0.172275	0.293648	1.22537
(TAAAA)n	-0.902554	6.12357e-08	16.6085
(TAAAAA)n	0.189408	0.5825	0.540426
(TAAAG)n	1.06095	NA	NA
(TAAG)n	0.101265	0.905398	0.0993811
(TAATG)n	-4.42034	0.0106979	4.53771
(TACGG)n	1.06095	NA	NA
(TACTG)n	-0.673285	0.769339	0.262223
(TAG)n	-1.30813	0.00604337	5.10879
(TAGA)n	-0.816658	1.19089e-07	15.9434
(TAGG)n	-1.3188	0.000725157	7.22912
(TAGGG)n	0.571142	NA	NA
(TAGTG)n	-1.64953	0.00604337	5.10879
(TATAA)n	-0.583439	0.306719	1.18182
(TATAG)n	-3.4733	0.0274067	3.59697
(TATATG)n	0.46455	0.000118365	9.04174
(TATCG)n	NA	NA	NA
(TATG)n	-0.0707051	0.703523	0.351654
(TATTG)n	-0.610951	0.355322	1.03473
(TC)n	-0.158526	0.68669	0.375872
(TCC)n	0.932886	1.79833e-08	17.8338
(TCCA)n	-0.188611	0.499061	0.695028
(TCCC)n	0.0128608	0.965202	0.0354178
(TCCCC)n	0.284655	0.0695234	2.66609
(TCCCG)n	0.47253	0.36599	1.00515
(TCCG)n	0.495546	0.273901	1.29499
(TCCGG)n	NA	NA	NA
(TCCTG)n	-2.54707	5.45461e-07	14.4216
(TCG)n	1.05475	0.00544802	5.2125
(TCGGG)n	1.09095	0.225796	1.48812
(TCGTG)n	NA	NA	NA
(TCTA)n	0.891694	5.70246e-06	12.0746
(TCTCC)n	0.357668	0.162939	1.81438
(TCTCCC)n	0.043873	0.936435	0.0656753
(TCTCG)n	1.57093	NA	NA
(TCTCTG)n	0.197319	0.361081	1.01865
(TCTG)n	0.225732	0.20852	1.56772
(TCTTG)n	1.66238	0.0513907	2.9683
(TG)n	0.403807	0.0750336	2.58982
(TGAA)n	-0.368272	0.247414	1.39669
(TGAG)n	0.221835	0.531697	0.631681
(TGG)n	0.703833	0.0012941	6.64994
(TGGA)n	0.166741	0.231296	1.46406
(TGGG)n	-0.173952	0.482185	0.729427
(TGGGGG)n	-0.878854	4.75138e-05	9.95449
(TTA)n	1.39424	9.60437e-29	64.5127
(TTAA)n	-0.331985	0.358735	1.02517
(TTAAA)n	-2.04017	0.284351	1.25755
(TTAAG)n	0.149828	NA	NA
(TTACG)n	2.02273	NA	NA
(TTAG)n	-0.221563	0.654532	0.423835
(TTAGG)n	2.76348	NA	NA
(TTAGGC)n	0.293244	0.543333	0.610032
(TTAGGG)n	-0.805087	0.0266347	3.62554
(TTATA)n	-0.143098	0.848961	0.163742
(TTATG)n	-2.79498	0.251105	1.38188
(TTC)n	0.58705	0.034	3.38139
(TTCA)n	-0.405058	0.0304068	3.49309
(TTCC)n	0.0632111	0.706071	0.34804
(TTCCC)n	-0.16835	0.683726	0.380198
(TTCCG)n	NA	NA	NA
(TTCG)n	2.59315	0.214417	1.53983
(TTCGG)n	1.06095	NA	NA
(TTCGGG)n	2.78113	0.0909109	2.39788
(TTCTC)n	-0.523351	0.0412392	3.18837
(TTCTCC)n	-0.012765	0.975974	0.024319
(TTCTG)n	0.782086	0.00155821	6.46422
(TTG)n	0.321752	0.0435465	3.13393
(TTGG)n	-0.0619952	0.730044	0.31465
(TTGGGG)n	-0.308172	0.664521	0.408689
(TTGTG)n	-1.80147	1.54064e-23	52.5273
(TTTA)n	0.472806	0.0366949	3.30512
(TTTAA)n	-1.33028	7.47525e-05	9.50133
(TTTAG)n	-2.2312	0.266132	1.32376
(TTTC)n	0.32094	0.0271708	3.60561
(TTTCC)n	-1.13889	3.71119e-07	14.8067
(TTTCG)n	NA	NA	NA
(TTTG)n	-0.18866	0.53417	0.627042
(TTTTA)n	0.38436	0.191804	1.65128
(TTTTC)n	0.706895	5.42414e-05	9.82207
(TTTTG)n	0.130634	0.71773	0.331662
(TTTTTA)n	-0.537669	0.12813	2.05471
(TTTTTG)n	0.256697	0.277001	1.28374
4.5SRNA	-1.06791	0.000499721	7.60146
5S	-0.0279702	0.88131	0.126346
7SK	-0.883964	0.000225539	8.39702
7SLRNA	1.33655	1.5269e-43	98.5879
A-rich	0.444391	0.0195644	3.93404
AmnSINE1	-0.182298	0.154493	1.86761
AmnSINE2	0.0587829	0.730475	0.314061
Arthur1	0.0101056	0.976198	0.0240899
Arthur1A	2.00011	5.95513e-07	14.3338
Arthur1B	0.725534	0.00687125	4.98041
Arthur1C	-0.394617	0.701528	0.354494
AT_rich	0.38335	0.0809906	2.51342
B1_Mm	0.0852496	0.165735	1.79737
B1_Mur1	0.0746913	0.313614	1.15959
B1_Mur2	0.260417	2.44665e-06	12.9208
B1_Mur3	0.116364	0.127135	2.06251
B1_Mur4	0.224109	2.93927e-06	12.7373
B1_Mus1	0.0657978	0.339431	1.08049
B1_Mus2	0.0314595	0.772094	0.258649
B1F	0.0720326	0.315538	1.15348
B1F1	0.154991	0.0310029	3.47367
B1F2	0.263681	0.00106448	6.84527
B2_Mm1a	-0.537466	0.134599	2.00546
B2_Mm1t	-0.53652	0.0217228	3.82939
B2_Mm2	-0.381447	0.0526606	2.94389
B3	-0.193583	0.0986748	2.31593
B3A	-0.214931	0.0277423	3.5848
B4	0.112006	0.0888811	2.42046
B4A	-0.154823	0.16521	1.80054
BC1_Mm	0.286713	0.000567596	7.4741
BGLII	-0.41191	0.0214616	3.84149
BGLII_A	-1.05463	0.00252136	5.98296
BGLII_B	-0.630137	0.0154147	4.17243
BGLII_B2	-0.195486	0.56743	0.566638
BGLII_C	-0.862189	0.374561	0.982001
BGLII_Mur	-0.893368	0.00263847	5.93756
BGLII_Mus	0.744388	0.0277423	3.5848
BLACKJACK	-0.7533	0.0636759	2.75395
C-rich	0.426972	0.0552623	2.89566
C573_MM	1.06095	NA	NA
CENSAT_MC	NA	NA	NA
Chap1_Mam	0.76557	0.000314178	8.06555
Charlie1	0.0471246	0.773962	0.256232
Charlie10	0.412058	0.00378091	5.57779
Charlie10a	1.28438	0.292536	1.22917
Charlie10b	-0.742123	0.428909	0.846511
Charlie11	1.09069	0.000397265	7.83091
Charlie12	-0.129792	0.68747	0.374737
Charlie13a	-0.616976	0.258865	1.35145
Charlie13b	-0.74006	0.272259	1.301
Charlie14a	-1.23558	0.132592	2.02048
Charlie15a	-0.258101	0.187655	1.67315
Charlie15b	-0.245032	0.616345	0.483948
Charlie16a	-0.21344	0.118423	2.13349
Charlie17	-0.0179807	0.966092	0.0344958
Charlie17a	0.704976	0.00105883	6.85059
Charlie17b	-0.483812	0.18381	1.69386
Charlie18a	0.0232656	0.920432	0.0829125
Charlie19a	-1.17508	0.00114699	6.77062
Charlie1a	-0.573615	0.000519299	7.56303
Charlie1b	-0.436865	0.00303712	5.79684
Charlie1b_Mars	1.06095	NA	NA
Charlie20a	-1.49216	0.0118303	4.43709
Charlie21a	-1.01264	0.171051	1.76579
Charlie22a	-0.00556434	0.986203	0.0138931
Charlie23a	-1.49545	4.36802e-07	14.6438
Charlie24	1.12138	4.90357e-15	32.9488
Charlie25	0.520311	0.217397	1.52603
Charlie26a	-0.168753	0.481838	0.730147
Charlie29a	-1.05141	0.203892	1.59016
Charlie2a	0.239023	0.521201	0.65162
Charlie2b	0.886928	2.48015e-12	26.7227
Charlie4	-0.651087	0.274877	1.29143
Charlie4a	-0.604557	2.80069e-06	12.7856
Charlie4z	-0.654813	0.000368493	7.90609
Charlie5	0.429236	0.00642505	5.04755
Charlie6	1.21819	1.80879e-13	29.341
Charlie7	0.321322	0.0649606	2.73397
Charlie7a	-1.02274	0.000167635	8.69372
Charlie8	0.255662	0.0865308	2.44725
Charlie9	-1.85328	7.71203e-05	9.47014
Cheshire	0.035494	0.856997	0.154321
Cheshire_Mars	-0.554702	NA	NA
Cheshire_Mars_	-1.73831	NA	NA
CR1_Mam	-0.0175264	0.945819	0.0557037
CT-rich	1.44729	8.71446e-13	27.7686
CYRA11_Mm	-0.783276	0.00772358	4.86348
DNA1_Mam	0.398155	0.678665	0.387627
ERV3-16A3_I-int	-0.403308	0.0466409	3.06528
ERV3-16A3_LTR	-0.964122	0.0409624	3.1951
ERVB2_1-I_MM-int	1.60255	3.16404e-05	10.3611
ERVB2_1A-I_MM-int	0.230945	0.20087	1.6051
ERVB3_1-I_MM-int	-0.471835	0.0799638	2.52618
ERVB3_1-LTR_MM	0.833965	0.00696593	4.96672
ERVB4_1-I_MM-int	-0.19993	0.689346	0.372012
ERVB4_1-LTR_MM	-0.509409	NA	NA
ERVB4_1B-I_MM-int	0.538447	0.104538	2.2582
ERVB4_1B-LTR_MM	0.280884	0.159785	1.83393
ERVB4_1C-LTR_Mm	0.391838	0.384392	0.956091
ERVB4_2-I_MM-int	0.422289	0.224312	1.49472
ERVB4_2-LTR_MM	1.02399	0.149493	1.90051
ERVB4_3-I_MM-int	0.224011	0.540904	0.614513
ERVB4_3-LTR_MM	-0.532102	0.675079	0.392926
ERVB5_1-I_MM-int	2.12655	7.38139e-09	18.7243
ERVB5_1-LTR_MM	-0.74804	0.103838	2.26492
ERVB5_2-LTR_MM	0.501149	0.141237	1.95732
ERVB7_1-LTR_MM	0.163909	0.599935	0.510934
ERVB7_2-LTR_MM	0.403166	0.0191236	3.95683
ERVB7_2B-LTR_MM	0.51893	0.0402508	3.21263
ERVB7_3-LTR_MM	-1.02328	0.0129999	4.34281
ERVB7_4-LTR_MM	-0.427067	0.366771	1.00302
ERVL-B4-int	0.0277483	0.922607	0.0805522
ERVL-E-int	0.67512	0.000104677	9.16463
ERVL-int	0.780281	0.0687125	2.67782
ETnERV-int	-0.211332	0.226206	1.48631
ETnERV2-int	0.482135	0.0529414	2.93857
ETnERV3-int	-0.344869	0.335343	1.0926
Eulor1	0.674164	NA	NA
Eulor10	0.779514	0.705769	0.348468
Eulor11	1.06095	NA	NA
Eulor12	-0.708172	0.754186	0.282116
Eulor2A	0.817807	0.060724	2.80142
Eulor2B	-0.0372013	0.893694	0.112391
Eulor2C	-2.66886	NA	NA
Eulor3	NA	NA	NA
Eulor4	-1.05327	NA	NA
Eulor5A	-0.0394781	0.85677	0.154586
Eulor5B	NA	NA	NA
Eulor6A	NA	NA	NA
Eulor6B	-2.34235	0.136142	1.99406
Eulor6C	0.0991578	NA	NA
Eulor6D	-3.45742	0.0589194	2.83158
Eulor6E	1.15591	0.291867	1.23146
Eulor7	NA	NA	NA
Eulor8	1.06095	NA	NA
Eulor9A	0.65678	0.481385	0.731088
Eulor9B	1.06095	NA	NA
Eulor9C	-2.06503	0.293806	1.22484
FAM	-0.0779298	0.877612	0.130551
FordPrefect	0.128847	0.918582	0.0849243
FordPrefect_a	0.120274	0.961912	0.0388325
G-rich	0.250036	0.259855	1.34763
GA-rich	0.842654	4.51583e-06	12.3079
GC_rich	1.16023	0.00262678	5.942
GSAT_MM	-0.237196	0.902045	0.103091
HAL1	0.38993	0.0264941	3.63083
HAL1_SS	-1.43402	3.83191e-06	12.4721
HAL1b	-1.26251	2.19762e-06	13.0281
HAL1M8	-1.00509	2.73257e-05	10.5077
HAL1ME	0.944605	1.62705e-12	27.1443
hAT-N1_Mam	-1.17134	0.00127526	6.6646
Helitron1Na_Mam	-1.41263	0.413619	0.882811
Helitron1Nb_Mam	-0.43925	0.725502	0.320892
Helitron2Na_Mam	-0.940542	0.542584	0.611412
Helitron3Na_Mam	0.313714	0.257583	1.35641
HERV16-int	-0.80248	0.225796	1.48812
HERVL32-int	NA	NA	NA
HERVL40-int	0.241185	0.213297	1.54507
HERVL74-int	-1.45942	4.43301e-05	10.0238
HUERS-P3b-int	0.0991578	NA	NA
HY1	-0.162373	0.890214	0.116293
HY3	-1.04241	0.481003	0.731881
HY4	-1.03672	NA	NA
HY5	NA	NA	NA
IAP-d-int	-0.164505	0.660715	0.414432
IAP1-MM_I-int	1.03616	2.03296e-07	15.4086
IAP1-MM_LTR	0.427678	0.324215	1.12635
IAPA_MM-int	-1.17702	0.117668	2.13989
IAPEY_LTR	-0.0981602	0.755155	0.280833
IAPEy-int	0.406719	0.127741	2.05775
IAPEY2_LTR	0.0804996	0.891596	0.114742
IAPEY3_LTR	-0.826449	0.00645721	5.04256
IAPEY3-int	1.06569	8.24644e-07	14.0083
IAPEY3C_LTR	1.96779	0.00377331	5.5798
IAPEY4_I-int	1.96657	1.105e-92	211.738
IAPEY4_LTR	-0.00301007	0.994657	0.00535731
IAPEY5_I-int	0.224748	0.918582	0.0849243
IAPEY5_LTR	0.204633	0.801475	0.221301
IAPEz-int	0.273312	0.017519	4.04447
IAPLTR1_Mm	1.02515	1.59084e-13	29.4693
IAPLTR1a_Mm	1.11801	7.33148e-06	11.8233
IAPLTR2_Mm	-0.0507835	0.85861	0.15244
IAPLTR2a	-0.289855	0.126259	2.06942
IAPLTR2a2_Mm	0.321509	0.056802	2.86818
IAPLTR2b	0.240443	0.248744	1.39133
IAPLTR3	-3.15108	0.114339	2.16859
IAPLTR3-int	1.4781	4.35505e-06	12.3442
IAPLTR4	0.272939	0.698501	0.358818
IAPLTR4_I	-0.0100729	0.994255	0.00576152
ID	-0.169014	0.0985645	2.31704
ID_B1	0.0357563	0.610746	0.493074
ID2	0.0779537	0.675079	0.392926
ID4	0.342157	0.00212569	6.15366
ID4_	-0.0352104	0.714677	0.335925
IMPB_01	0.00163678	0.994122	0.00589564
Kanga1	0.112713	0.713267	0.337899
Kanga11a	-1.51251	0.0130562	4.33849
Kanga1a	-0.675232	0.15614	1.857
Kanga1b	1.39478	5.9129e-06	12.0384
Kanga1c	-1.13473	0.00176141	6.34164
Kanga1d	-2.41851	0.083497	2.48294
Kanga2_a	0.316376	0.00451787	5.39971
L1_Mm	-1.02805	0.00117565	6.74593
L1_Mur1	-0.657471	0.00117565	6.74593
L1_Mur2	-0.101589	0.244228	1.40965
L1_Mur3	-0.370901	0.00183204	6.30232
L1_Mus1	0.119794	0.122814	2.09708
L1_Mus2	-0.371372	0.000251255	8.28904
L1_Mus3	-0.684637	4.72183e-08	16.8685
L1_Mus4	-0.0349786	0.752468	0.284396
L1_Rod	-0.984471	5.95346e-06	12.0315
L1M	0.336031	0.216183	1.53163
L1M1	0.0252641	0.958405	0.0424844
L1M2	-0.170949	0.156581	1.85418
L1M2a	0.520968	0.0954334	2.34933
L1M2a1	5.18134	0.298525	1.2089
L1M2b	-0.753844	0.0440926	3.12146
L1M2c	-1.15302	0.00101926	6.88868
L1M3	0.317729	0.000633767	7.36383
L1M3a	-2.93877	0.092361	2.38205
L1M3b	-1.20024	0.085201	2.46274
L1M3c	0.499447	0.266304	1.32312
L1M3d	-0.406569	0.616345	0.483948
L1M3de	-0.579796	0.296284	1.21644
L1M3e	0.161987	0.334701	1.09452
L1M3f	0.88234	1.31257e-11	25.0564
L1M4	-0.324217	0.00091819	6.99311
L1M4a1	-1.17976	0.000602303	7.41475
L1M4a2	-0.019704	0.947337	0.0541001
L1M4b	0.168387	0.166426	1.7932
L1M4c	-0.22129	0.109198	2.2146
L1M5	0.11704	0.15891	1.83941
L1M6	0.428783	0.369639	0.99523
L1M6B	-1.22335	0.000506718	7.58756
L1M7	0.238214	0.62461	0.470628
L1M8	-1.40646	0.00296241	5.82175
L1MA10	-0.203753	0.604215	0.503825
L1MA4	0.085539	0.552437	0.593416
L1MA4A	-0.771946	0.00131537	6.63364
L1MA5	-0.525368	1.19089e-07	15.9434
L1MA5A	-0.404142	0.0196513	3.92961
L1MA6	0.493414	1.82724e-09	20.1205
L1MA7	-0.140636	0.378989	0.970248
L1MA8	-0.517808	0.0110446	4.50581
L1MA9	-0.292009	0.139963	1.96638
L1MB1	0.789993	8.03973e-15	32.4544
L1MB2	0.982597	2.19015e-25	56.7807
L1MB3	-0.424672	0.00101926	6.88868
L1MB4	-1.08055	4.17724e-24	53.8324
L1MB5	-0.401162	9.06043e-05	9.30901
L1MB7	0.193962	0.0811999	2.51084
L1MB8	0.0174176	0.927916	0.0748141
L1MC	0.0787272	0.626346	0.467852
L1MC1	-0.0307428	0.819121	0.199524
L1MC2	-0.757031	7.38139e-09	18.7243
L1MC3	-0.133965	0.290497	1.23616
L1MC4	-0.173374	0.039144	3.24051
L1MC4a	-0.272101	0.0408457	3.19795
L1MC5	-0.0383216	0.787226	0.23924
L1MC5a	-0.788086	0.000350987	7.95476
L1MCa	-0.033663	0.890548	0.115919
L1MCb	0.340327	0.180911	1.70975
L1MCc	-0.955028	0.0210962	3.85866
L1MD	0.230651	0.0515513	2.96518
L1Md_A	-0.0575228	0.606123	0.500673
L1Md_F	0.66425	0.000139892	8.87464
L1Md_F2	0.00274417	0.981582	0.0185898
L1Md_F3	0.531649	2.28046e-08	17.5963
L1Md_Gf	0.1834	0.640567	0.445402
L1Md_T	0.60725	2.21708e-05	10.7167
L1MD1	-0.0864996	0.745889	0.293178
L1MD2	-0.37888	0.251206	1.38148
L1MD3	1.40335	1.43095e-44	100.955
L1MDa	-0.698307	1.36963e-06	13.501
L1MDb	-0.160157	0.548472	0.60062
L1ME1	-0.434413	1.93462e-08	17.7608
L1ME2	-0.291929	0.0215023	3.83959
L1ME2z	-0.311566	0.0301121	3.50283
L1ME3	-0.925044	6.40746e-09	18.8658
L1ME3A	-0.149588	0.507851	0.677568
L1ME3B	-0.565897	0.00239471	6.03449
L1ME3C	-1.18164	0.0188897	3.96914
L1ME3Cz	0.047351	0.884079	0.123209
L1ME3D	0.164996	0.250509	1.38426
L1ME3E	0.897828	1.46417e-09	20.342
L1ME3F	-1.02161	1.22007e-07	15.9192
L1ME3G	-0.381552	0.00325327	5.7281
L1ME4a	-0.193678	0.445069	0.809526
L1ME4b	-0.169538	0.14813	1.90967
L1ME4c	0.237407	0.191804	1.65128
L1ME5	-2.08089	0.180911	1.70975
L1MEa	-1.6063	0.0613079	2.79185
L1MEb	0.261224	0.301247	1.19983
L1MEc	-0.22832	0.0522759	2.95122
L1MEd	-0.0171543	0.937774	0.0642464
L1MEf	-0.712645	2.28046e-08	17.5963
L1MEg	-0.476119	6.65289e-06	11.9205
L1MEg1	0.0549518	0.954015	0.047076
L1MEg2	-2.14217	0.0108945	4.5195
L1MEh	-0.661326	0.158126	1.84436
L1MEi	1.24462	0.000112458	9.09293
L1MEj	-0.24604	0.704054	0.3509
L1P5	-0.147074	0.840591	0.17365
L1PB4	-1.40003	0.0986748	2.31593
L1VL1	-0.115856	0.616345	0.483948
L1VL2	0.0142197	0.932949	0.0694045
L1VL4	0.642431	1.93234e-05	10.8542
L2	0.239424	0.123078	2.09494
L2a	-0.220825	0.0156959	4.15436
L2b	-0.235225	0.015266	4.18213
L2c	0.569548	1.42829e-07	15.7616
L3	0.549182	0.000434402	7.74154
L3b	0.185815	0.453302	0.791196
L4_A_Mam	0.277908	0.146825	1.91852
L4_B_Mam	0.0437589	0.92333	0.0797689
L4_C_Mam	-0.562118	0.068124	2.68643
L5	-0.53017	0.68747	0.374737
LFSINE_Vert	0.429518	0.0041804	5.47735
Looper	0.324694	0.440661	0.81948
LSU-rRNA_Hsa	0.961719	0.0233808	3.75584
LTR10_RN	0.137803	0.358523	1.02576
LTR101_Mam	0.611223	0.00114699	6.77062
LTR102_Mam	-0.154978	0.845385	0.167963
LTR103_Mam	3.34731	0.068124	2.68643
LTR103b_Mam	1.37288	8.60652e-05	9.36041
LTR104_Mam	0.533026	0.0424409	3.15964
LTR105_Mam	0.189292	0.855542	0.156021
LTR106_Mam	-1.59952	0.33109	1.10536
LTR107_Mam	-2.7383	0.111101	2.19731
LTR108a_Mam	1.10374	4.02452e-06	12.4231
LTR108b_Mam	-0.0137337	0.98485	0.0152655
LTR108c_Mam	2.76128	NA	NA
LTR108d_Mam	-0.683425	0.794188	0.230435
LTR108e_Mam	1.62674	6.19237e-14	30.4129
LTR109A2	0.75189	0.498161	0.696832
LTR16A	0.815442	1.87105e-10	22.3994
LTR16A1	-0.720737	0.14707	1.91685
LTR16A2	0.52025	0.0757874	2.57982
LTR16B	0.396598	0.18838	1.6693
LTR16B1	-0.490841	0.346014	1.06128
LTR16B2	-0.605903	0.153419	1.87458
LTR16C	0.419298	0.104511	2.25847
LTR16D	-0.941836	0.388751	0.944817
LTR16D1	0.501699	0.0745538	2.59623
LTR16D2	0.389471	0.0434539	3.13605
LTR16E1	-0.103824	0.796547	0.227469
LTR16E2	-1.06675	0.157803	1.84641
LTR23-int	0.0991578	NA	NA
LTR27C	NA	NA	NA
LTR28	-1.37313	NA	NA
LTR28B	0.25043	0.20087	1.6051
LTR29	3.86033	0.120622	2.1151
LTR31	-0.846561	0.0147308	4.21781
LTR32	1.42306	NA	NA
LTR33	-0.795779	3.71119e-07	14.8067
LTR33A	0.52465	0.00401078	5.51877
LTR33A_	-0.686866	0.0116813	4.44977
LTR33B	0.472728	0.0220982	3.81226
LTR33C	0.909106	5.01777e-06	12.2025
LTR34	1.06095	NA	NA
LTR36	NA	NA	NA
LTR37-int	0.140109	0.367763	1.00032
LTR37A	-0.714981	0.0624175	2.77391
LTR37B	-0.735398	0.079755	2.5288
LTR39	-2.44553	0.216739	1.52906
LTR40a	-0.814865	0.0435465	3.13393
LTR40A1	-1.49704	0.0996152	2.30644
LTR40b	-0.142973	0.714677	0.335925
LTR40c	-0.16582	0.56743	0.566638
LTR41	0.319571	0.0438518	3.12694
LTR41B	-1.83981	2.08459e-29	66.0404
LTR44	1.06095	NA	NA
LTR45	-0.631862	0.0126909	4.36687
LTR45C	-1.5764	0.445069	0.809526
LTR48	-0.143518	0.674856	0.393256
LTR48B	0.0646073	0.880199	0.127608
LTR50	0.807219	3.19141e-05	10.3525
LTR52	-0.511925	0.444037	0.811848
LTR52-int	-2.62184	0.212594	1.54837
LTR53	-1.5419	0.0182232	4.00506
LTR53B	0.498372	0.492434	0.708394
LTR55	-1.73717	0.0780702	2.55015
LTR58	-0.780289	NA	NA
LTR59	0.0991578	NA	NA
LTR64	-0.509412	NA	NA
LTR65	0.207918	0.535378	0.624782
LTR67B	0.846591	6.78848e-05	9.5977
LTR68	-0.256253	0.828835	0.187734
LTR69	-1.06357	0.282715	1.26332
LTR72_RN	1.01759	2.84843e-19	42.7023
LTR73	-0.824673	0.344993	1.06423
LTR75	0.370118	0.0627516	2.76857
LTR75_1	3.11031	0.352799	1.04186
LTR75B	-1.04839	0.401864	0.911642
LTR77	-0.732682	NA	NA
LTR78	0.0427639	0.890548	0.115919
LTR78B	0.62935	0.00359005	5.62959
LTR79	1.05135	4.38323e-10	21.5481
LTR80A	-2.24476	0.0515546	2.96511
LTR80B	-1.46512	0.375623	0.979168
LTR81	0.0250709	0.951158	0.050075
LTR81A	-0.590966	0.439074	0.823086
LTR81B	1.6648	6.46081e-12	25.7653
LTR81C	0.917087	1.82724e-09	20.1205
LTR82A	0.279102	0.468119	0.759032
LTR82B	0.855513	0.0279392	3.57772
LTR83	-0.385003	0.591916	0.524391
LTR84a	-1.33062	0.311651	1.16587
LTR84b	-1.57001	8.73349e-05	9.34576
LTR85a	-0.150201	0.798615	0.224876
LTR85b	1.97119	0.369639	0.99523
LTR85c	0.995517	0.0039174	5.54233
LTR86A1	-2.14777	0.0680445	2.68759
LTR86A2	-1.06795	0.667658	0.40398
LTR86B1	0.621859	0.00101513	6.89274
LTR86B2	-5.24919	0.000104677	9.16463
LTR86C	-0.410861	0.573849	0.555389
LTR87	-0.171173	0.521364	0.651306
LTR88a	-0.464542	0.370222	0.993653
LTR88b	1.98779	0.00032283	8.03838
LTR88c	1.72438	0.0244036	3.71302
LTR89	0.374015	0.0936558	2.36813
LTR9	1.08434	2.06945e-07	15.3908
LTR90A	0.231227	0.819594	0.198947
LTR90B	-0.444656	0.788558	0.237549
LTR91	NA	NA	NA
LTR9A1	0.0991585	NA	NA
LTR9D	1.06095	0.72533	0.321129
LTRIS_Mm	0.110603	0.799263	0.224066
LTRIS_Mus	0.4787	8.48585e-06	11.6771
LTRIS2	0.147801	0.385929	0.952103
LTRIS3	-1.28512	0.0110014	4.50973
LTRIS4	-0.751533	0.175323	1.74113
LTRIS4A	-2.03343	1.16446e-05	11.3607
LTRIS4B	0.321411	0.808108	0.213059
LTRIS5	0.476554	0.64436	0.439498
LTRIS6	-1.32223	0.269169	1.31241
Lx	0.379293	0.00147699	6.51775
Lx10	0.0338115	0.797846	0.22584
Lx2	0.447398	6.03667e-05	9.71507
Lx2A	0.129386	0.540931	0.614463
Lx2A1	-0.381617	0.277021	1.28366
Lx2B	0.291769	0.00447643	5.40893
Lx2B2	-0.143375	0.194887	1.63533
Lx3_Mus	-0.12082	0.27814	1.27963
Lx3A	0.238179	0.18838	1.6693
Lx3B	-0.00471489	0.970527	0.0299162
Lx3C	-0.402724	0.000374338	7.89035
Lx4A	0.0544398	0.597481	0.515032
Lx4B	-0.668322	8.36823e-06	11.6911
Lx5	0.274256	0.000399303	7.82579
Lx5b	-0.038964	0.716928	0.33278
Lx5c	-0.0223092	0.889795	0.116764
Lx6	-0.0954718	0.358536	1.02573
Lx7	0.0332618	0.707709	0.345722
Lx8	-0.0178883	0.901013	0.104236
Lx8b	-0.405876	1.44201e-12	27.265
Lx9	-0.094419	0.195773	1.6308
MADE2	-0.513123	0.158516	1.8419
Mam_R4	-2.53482	1.23688e-11	25.1158
MamGyp-int	1.24292	2.12017e-31	70.6286
MamGypLTR1a	-0.249511	0.874421	0.134193
MamGypLTR1b	-0.74522	0.060724	2.80142
MamGypLTR1c	-3.39339	1.70267e-06	13.2833
MamGypLTR1d	0.99267	0.335343	1.0926
MamGypLTR2b	-0.534846	0.563121	0.574261
MamGypLTR2c	0.883165	0.568168	0.565337
MamGypLTR3	0.735557	0.394445	0.930277
MamGypLTR3a	1.12385	3.48869e-08	17.1712
MamRep1151	-1.08812	0.0835597	2.48219
MamRep1161	2.02273	NA	NA
MamRep137	0.775501	3.36015e-09	19.5113
MamRep1527	1.23081	0.0116813	4.44977
MamRep1879	-1.81769	0.0534173	2.92962
MamRep1894	0.00346133	0.997545	0.00245786
MamRep38	1.70715	1.1121e-09	20.617
MamRep4096	-3.33186	0.0748358	2.59246
MamRep434	-0.31262	0.250509	1.38426
MamRep488	-1.79295	NA	NA
MamRep564	-0.977338	0.319953	1.13958
MamRep605	-0.164544	0.362444	1.01489
MamSINE1	-0.202338	0.284351	1.25755
MamTip1	-1.26364	0.0882556	2.42752
MamTip2	0.656001	2.42189e-06	12.931
MamTip3	-0.239388	0.473932	0.746692
MARINER1_EC	NA	NA	NA
MARNA	0.576638	1.12223e-12	27.5157
MER101B	-0.0987731	0.890548	0.115919
MER102a	1.00382	4.59904e-11	23.8026
MER102b	0.526604	0.00142138	6.55612
MER102c	-0.578315	0.010349	4.57086
MER103C	0.148128	0.242409	1.41713
MER104	-0.934533	0.0154694	4.16889
MER105	-0.176107	0.66585	0.406691
MER106A	-0.0758796	0.85677	0.154586
MER106B	-0.385469	0.15653	1.85451
MER110	-1.74445	0.0217228	3.82939
MER110-int	-1.89162	0.0108873	4.52016
MER110A	0.316611	0.159785	1.83393
MER112	0.706934	1.99018e-05	10.8247
MER113	0.455625	0.00218443	6.1264
MER113A	-0.123078	0.750821	0.286588
MER113B	-1.54956	0.122198	2.10211
MER115	-0.485319	0.0545298	2.90901
MER117	-1.68305	4.22044e-35	79.1505
MER119	-0.264963	0.293806	1.22484
MER121	1.00337	0.0142331	4.25219
MER123	-0.767451	0.362244	1.01544
MER124	-0.713777	9.2079e-06	11.5954
MER125	1.5725	0.412523	0.885464
MER126	-0.239949	0.518379	0.657049
MER127	0.259271	0.854068	0.157745
MER129	-2.00253	0.218518	1.52089
MER130	0.877508	2.64759e-06	12.8419
MER131	-0.209318	0.535378	0.624782
MER132	1.06095	NA	NA
MER133A	2.66779	NA	NA
MER133B	1.06095	NA	NA
MER134	-1.0019	0.704054	0.3509
MER135	-0.847764	0.0323862	3.43002
MER136	0.914683	0.471643	0.751532
MER2	-0.634547	5.3427e-21	46.6786
MER20	0.0786212	0.620557	0.477137
MER20B	0.662239	0.000322573	8.03918
MER21-int	-0.666934	0.623918	0.471736
MER21B	0.266985	0.0172332	4.06091
MER21C	0.63581	3.29416e-05	10.3208
MER2B	-0.57283	3.94799e-05	10.1397
MER3	-0.284187	0.0916862	2.38938
MER31-int	1.76119	2.54606e-05	10.5784
MER31A	0.551838	1.09453e-06	13.7252
MER31B	0.416236	0.0255304	3.66788
MER33	-0.125624	0.284675	1.25641
MER34	0.009518	0.976198	0.0240899
MER34-int	-1.93626	0.141637	1.95449
MER34A	-0.654232	0.0434474	3.1362
MER34A1	-0.49128	0.0547178	2.90557
MER34B-int	0.494175	0.0217038	3.83027
MER44A	-0.803174	5.27012e-11	23.6664
MER44B	0.103345	0.413619	0.882811
MER44C	1.30183	1.96771e-15	33.8619
MER44D	-0.830757	0.000694529	7.27228
MER45A	0.382348	0.0387324	3.25108
MER45B	-0.625162	0.0167017	4.09225
MER45C	0.504522	0.118363	2.134
MER45R	-0.349939	0.292868	1.22803
MER46C	0.542898	0.0193542	3.94484
MER47A	-0.128461	0.802637	0.219853
MER47B	-0.972737	0.00101926	6.88868
MER47C	NA	NA	NA
MER49	1.79495	2.06945e-07	15.3908
MER4B-int	-2.75174	0.0985277	2.31742
MER4CL34	-2.50013	NA	NA
MER50	0.405432	0.0453643	3.09303
MER50-int	0.518652	0.796547	0.227469
MER50B	1.39803	3.26311e-11	24.1458
MER51-int	-0.722739	0.293806	1.22484
MER52-int	-2.88151	0.00194443	6.24279
MER53	-0.221789	0.430847	0.842003
MER54A	-0.0848211	0.791811	0.233432
MER54B	-0.00110229	0.997652	0.00235125
MER57-int	-0.396137	0.565813	0.569492
MER57C2	-1.33827	0.0758991	2.57835
MER57D	1.95109	2.06116e-31	70.6569
MER57E1	-1.60634	0.0123675	4.39268
MER57E2	1.67109	5.15951e-23	51.3186
MER57E3	NA	NA	NA
MER58A	-0.0697367	0.610746	0.493074
MER58B	-0.256425	0.00648066	5.03893
MER58C	-0.0968675	0.63404	0.455643
MER58D	-0.734865	0.0116813	4.44977
MER5A	-0.107104	0.558882	0.581817
MER5A1	-0.0694649	0.78759	0.238778
MER5B	0.328648	2.73868e-05	10.5055
MER5C	-0.0578956	0.899408	0.106018
MER5C1	-0.441562	0.620659	0.476974
MER63A	-0.370275	0.0153698	4.17535
MER63B	-0.298623	0.166021	1.79564
MER63C	0.845336	0.000250577	8.29174
MER63D	0.325617	0.144227	1.93637
MER65-int	-0.665982	0.533148	0.628956
MER65D	-1.73811	0.120591	2.11535
MER66-int	-0.084671	0.790342	0.235289
MER66A	0.0193455	0.994122	0.00589564
MER66B	1.06095	NA	NA
MER66C	0.0991578	NA	NA
MER67A	-1.63224	0.00470357	5.35943
MER67B	-0.445923	0.334701	1.09452
MER67C	-0.149699	0.689448	0.371864
MER67D	0.114022	0.808514	0.212557
MER68	0.0521191	0.813664	0.206208
MER68-int	0.137255	0.913518	0.0904522
MER68B	-1.08939	2.11565e-07	15.3687
MER68C	0.899934	0.627519	0.465981
MER70-int	0.46483	0.52464	0.645042
MER70A	-0.105596	0.89842	0.107118
MER70B	-0.244508	0.725443	0.320973
MER72	-2.06643	NA	NA
MER72B	-0.599984	0.725443	0.320973
MER73	2.64873	8.70176e-07	13.9546
MER74A	0.39317	0.233774	1.4534
MER74B	-0.338752	0.332287	1.10176
MER74C	-0.991688	0.659466	0.416325
MER76	-0.566508	0.200702	1.60594
MER76-int	1.06095	NA	NA
MER77	-0.468536	0.0129999	4.34281
MER77B	-0.246697	0.503876	0.685424
MER81	0.557779	0.0130562	4.33849
MER83A-int	NA	NA	NA
MER83B-int	1.06095	NA	NA
MER87	0.680574	0.209185	1.56453
MER88	2.34391	1.0623e-08	18.3602
MER89	3.72198	1.81927e-88	202.029
MER89-int	NA	NA	NA
MER90	-0.392556	0.445069	0.809526
MER90a	0.284299	0.336497	1.08917
MER91A	-1.12079	0.00317455	5.75259
MER91B	-0.605333	0.0160783	4.13028
MER91C	-2.54134	0.102092	2.28188
MER92-int	-0.913162	0.0544629	2.91024
MER92A	0.075993	0.96694	0.0336189
MER92B	0.6077	2.80323e-06	12.7847
MER92C	-0.564814	0.597481	0.515032
MER92D	-1.51048	0.576097	0.551479
MER94	-0.716883	0.0264703	3.63173
MER94B	-1.02584	0.610155	0.494042
MER95	-1.94759	NA	NA
MER96	-1.0156	0.161587	1.82271
MER96B	0.115545	0.541892	0.612688
MER97a	-0.524967	0.521201	0.65162
MER97b	0.291179	0.74316	0.296844
MER97c	0.617153	0.765605	0.267089
MER97d	0.407628	NA	NA
MER99	0.233409	0.576097	0.551479
MERV1_I-int	-0.116792	0.76317	0.270275
MERV1_LTR	0.223794	0.102398	2.27889
MERVK26-int	0.497359	0.136276	1.99307
MERVL_2A-int	0.305596	0.00138343	6.58319
MERVL-int	0.23417	0.150532	1.89358
MERX	-1.85157	0.299245	1.20649
MIR	0.0396584	0.606587	0.499908
MIR3	0.191513	0.214393	1.53994
MIRb	0.169578	0.114995	2.16286
MIRc	0.0825561	0.60765	0.498157
MLT-int	-0.424389	0.00165773	6.40231
MLT1-int	0.576093	0.0428895	3.14913
MLT1A	-0.657213	5.7386e-09	18.9761
MLT1A-int	-2.68032	0.0126909	4.36687
MLT1A0	-0.244696	0.0809906	2.51342
MLT1A0-int	-1.2632	0.0116813	4.44977
MLT1A1	-2.16586	1.10156e-27	62.0731
MLT1A1-int	0.410037	0.707709	0.345722
MLT1B	-0.143197	0.195393	1.63274
MLT1B-int	-0.941539	0.00245629	6.0091
MLT1C	0.0959068	0.33073	1.10645
MLT1C-int	-0.56599	0.626346	0.467852
MLT1D	0.72416	5.52311e-35	78.8815
MLT1D-int	-0.534799	0.108102	2.22468
MLT1E	0.728644	0.00113071	6.78491
MLT1E-int	-1.05327	NA	NA
MLT1E1	0.996169	1.73417e-10	22.4753
MLT1E1-int	NA	NA	NA
MLT1E1A	0.74867	2.8669e-07	15.0649
MLT1E1A-int	NA	NA	NA
MLT1E2	0.0924767	0.405188	0.903404
MLT1E2-int	-1.01408	0.190442	1.65841
MLT1E3	-1.46418	3.53129e-06	12.5538
MLT1E3-int	NA	NA	NA
MLT1F	1.32391	4.14677e-15	33.1164
MLT1F-int	-0.869749	0.00707909	4.95061
MLT1F1	-0.136104	0.707709	0.345722
MLT1F1-int	-0.951151	0.605003	0.502521
MLT1F2	-0.122066	0.353416	1.04011
MLT1F2-int	-1.64718	1.01336e-05	11.4997
MLT1G	-0.00477415	0.98771	0.0123657
MLT1G-int	-0.981485	0.509026	0.675257
MLT1G1	0.827713	4.56457e-08	16.9024
MLT1G1-int	0.333013	0.878707	0.129304
MLT1G3	-0.0393856	0.85861	0.15244
MLT1G3-int	-0.262449	0.826929	0.190036
MLT1H	3.45898	1.70817e-196	450.771
MLT1H-int	-0.744815	0.000423046	7.76803
MLT1H1	0.389815	0.257583	1.35641
MLT1H1-int	0.454205	0.769339	0.262223
MLT1H2	-0.904645	0.00349707	5.65583
MLT1H2-int	2.21299	0.27814	1.27963
MLT1I	-0.0347293	0.891596	0.114742
MLT1I-int	0.107478	0.976198	0.0240899
MLT1J	0.133135	0.368747	0.997644
MLT1J-int	1.23099	3.98899e-15	33.1552
MLT1J1	-0.22658	0.543333	0.610032
MLT1J1-int	-2.43131	NA	NA
MLT1J2	1.02266	6.15487e-12	25.8138
MLT1J2-int	1.06095	NA	NA
MLT1K	-0.121243	0.535378	0.624782
MLT1K-int	1.06095	NA	NA
MLT1L	0.358619	0.00174039	6.35365
MLT1L-int	NA	NA	NA
MLT1M	0.980378	7.74976e-27	60.1221
MLT1N2	0.273306	0.137027	1.98758
MLT1N2-int	NA	NA	NA
MLT1O	-0.307273	0.212594	1.54837
MLT1O-int	NA	NA	NA
MLT2B1	0.0434382	0.859462	0.151449
MLT2B2	0.119622	0.622519	0.473982
MLT2B3	-0.0103206	0.976198	0.0240899
MLT2B4	0.529746	0.00886353	4.72581
MLT2B5	-0.67852	0.000247298	8.30491
MLT2C1	-0.782322	0.0230789	3.76884
MLT2C2	0.650693	0.0393287	3.2358
MLT2D	1.04267	6.32813e-11	23.4834
MLT2E	-1.0325	0.370721	0.992305
MLT2F	0.136739	0.319953	1.13958
MLTR11A	-0.592265	6.97678e-11	23.3858
MLTR11B	-0.143971	0.401864	0.911642
MLTR12	-0.500023	0.0120974	4.41476
MLTR13	1.29383	2.73278e-13	28.9283
MLTR14	-0.265879	0.0188682	3.97028
MLTR18_MM	1.19048	2.82357e-06	12.7775
MLTR18A_MM	0.27239	0.521264	0.651499
MLTR18B_MM	1.14605	2.95458e-23	51.8761
MLTR18C_MM	-0.561662	0.0876658	2.43422
MLTR18D_MM	-1.14733	0.000440978	7.72651
MLTR25A	-0.297896	0.283452	1.26071
MLTR25C	1.17415	1.64825e-08	17.921
MLTR31A_MM	-0.798991	0.211933	1.55148
MLTR31C_MM	0.418258	0.18838	1.6693
MLTR31D_MM	-0.589601	0.120622	2.1151
MLTR31E_MM	-1.5328	0.000564944	7.47878
MLTR31F_MM	-0.20599	0.516268	0.661128
MLTR31FA_MM	-0.344542	0.0855892	2.4582
MLTR32C_MM	0.601554	0.502091	0.688973
MLTR73	0.424132	0.00745896	4.89834
MMAR1	-0.312402	0.215635	1.53417
MMERGLN_LTR	-0.283354	0.209086	1.56501
MMERGLN-int	-0.770913	2.19892e-20	45.2637
MMERVK10C-int	0.744815	2.8616e-10	21.9745
MMERVK10D3_I-int	1.94755	2.84847e-44	100.267
MMERVK10D3_LTR	1.94938	7.78562e-12	25.5787
MMERVK9C_I-int	-0.332573	0.0592042	2.82676
MMERVK9E_I-int	-0.391642	0.0106212	4.5449
MMETn-int	0.116313	0.530425	0.634076
MMSAT4	0.954653	1.10156e-27	62.0731
MMTV-int	-0.689561	0.357121	1.02968
MMVL30-int	2.43629	2.84419e-105	240.726
MRLTR33	0.347573	0.0283162	3.56432
MT-int	-0.462447	0.203211	1.59351
MT2_Mm	0.135017	0.316502	1.15043
MT2A	0.657368	5.35784e-12	25.9525
MT2B	0.867615	1.94127e-09	20.0599
MT2B1	-0.129044	0.311651	1.16587
MT2B2	0.882876	5.04435e-11	23.7102
MT2C_Mm	-0.0710225	0.638867	0.448059
MTA_Mm	-0.658133	5.0532e-05	9.8929
MTA_Mm-int	0.0298339	0.753554	0.282954
MTB	-0.562501	1.28778e-06	13.5626
MTB_Mm	-0.437531	0.0006552	7.33057
MTB_Mm-int	-0.419739	0.0141317	4.25933
MTB-int	-0.336785	0.0390793	3.24216
MTC	-0.234002	0.0691184	2.67193
MTC-int	-0.13784	0.369639	0.99523
MTD	0.200625	0.151115	1.88971
MTD-int	-0.620373	0.00101513	6.89274
MTE-int	0.257914	0.0102882	4.57675
MTE2a	-0.0792766	0.521558	0.650934
MTE2a-int	0.441764	0.0406925	3.20171
MTE2b	0.196607	0.0731086	2.61581
MTE2b-int	-0.0792805	0.665231	0.407622
MTEa	-0.0624926	0.418964	0.869971
MTEa-int	-0.347151	0.023051	3.77005
MTEb	-0.0766311	0.516268	0.661128
MTEb-int	-0.143631	0.61506	0.486035
MuLV-int	0.226591	0.113445	2.17644
MurERV4_19-int	0.684561	0.000435473	7.73908
MurERV4-int	0.118683	0.606322	0.500345
MuRRS-int	0.775263	2.19762e-06	13.0281
MuRRS4-int	-0.244318	0.327465	1.11637
MurSAT1	0.0991578	NA	NA
MurSatRep1	0.921295	1.10156e-27	62.0731
MURVY-int	-0.872429	0.181835	1.70466
MURVY-LTR	-0.465577	0.00622498	5.07919
MusHAL1	0.0325873	0.874421	0.134193
MYSERV-int	-0.479001	0.0150377	4.1972
MYSERV16_I-int	-0.566093	0.000239841	8.33554
MYSERV6-int	-0.349086	0.000311622	8.07372
nhAT5a_ML	2.8423	NA	NA
ORR1A0	-0.272673	0.0766966	2.5679
ORR1A0-int	-0.48898	0.000380897	7.87298
ORR1A1	-0.276331	0.0120345	4.41998
ORR1A1-int	0.255048	0.0235068	3.75047
ORR1A2	-0.412986	3.70388e-05	10.2035
ORR1A2-int	0.238737	0.294002	1.22417
ORR1A3	-0.226186	0.0114495	4.46981
ORR1A3-int	-0.168297	0.446802	0.80564
ORR1A4	0.0154557	0.948335	0.0530478
ORR1A4-int	0.27945	0.0105302	4.55351
ORR1B1	-0.0782725	0.346014	1.06128
ORR1B1-int	-0.541314	3.49339e-07	14.8672
ORR1B2	-0.26382	0.0148673	4.20859
ORR1B2-int	-0.574563	0.00226891	6.08846
ORR1C1	0.103254	0.535378	0.624782
ORR1C1-int	-0.273722	0.277021	1.28366
ORR1C2	0.0860779	0.328868	1.1121
ORR1C2-int	-0.668517	0.000299913	8.11202
ORR1D-int	0.513842	0.0206014	3.88239
ORR1D1	0.0542532	0.61506	0.486035
ORR1D1-int	0.16749	0.250509	1.38426
ORR1D2	-0.0213918	0.883427	0.123947
ORR1D2-int	1.08714	3.52675e-37	83.9353
ORR1E	0.331118	0.00161799	6.42657
ORR1E-int	-0.89101	3.54296e-05	10.248
ORR1F	-0.146472	0.0399725	3.21956
ORR1F-int	0.139327	0.776022	0.253574
ORR1G	-0.0526105	0.595233	0.518803
ORR1G-int	0.0465181	NA	NA
ORSL	0.129355	0.650299	0.430322
ORSL-2a	0.638165	0.704894	0.349708
ORSL-2b	-0.97394	0.0234305	3.75372
PB1	0.164725	0.0374562	3.28458
PB1D10	0.0366251	0.550417	0.597079
PB1D11	-0.0470372	0.569425	0.563128
PB1D7	0.0166751	0.893984	0.112067
PB1D9	-0.147351	0.00698178	4.96445
Plat_L3	-0.224123	0.142215	1.95041
polypurine	0.754563	6.62004e-11	23.4383
polypyrimidine	0.790305	1.15239e-05	11.3711
RCHARR1	-0.0646434	0.565813	0.569492
Ricksha	0.315757	0.412523	0.885464
Ricksha_0	0.635679	0.0435465	3.13393
Ricksha_a	-0.468424	0.823721	0.193924
Ricksha_b	0.0776896	NA	NA
Ricksha_c	-0.216227	0.587427	0.532004
RLTR1	1.06095	NA	NA
RLTR10	0.788215	5.70246e-06	12.0746
RLTR10-int	0.836807	8.01063e-10	20.9451
RLTR10A	1.15984	9.32959e-13	27.7004
RLTR10B	-0.199121	0.640567	0.445402
RLTR10B2	0.25358	0.566691	0.56794
RLTR10C	-0.535582	0.0466409	3.06528
RLTR10D	0.415917	0.185116	1.68677
RLTR10D2	0.419428	0.520682	0.652616
RLTR10E	1.64908	7.11479e-33	74.0231
RLTR10F	1.27702	3.79415e-07	14.7846
RLTR11A	-1.78954	5.48196e-41	92.7045
RLTR11A2	-0.588023	5.37399e-10	21.3443
RLTR11B	-0.353515	0.283186	1.26165
RLTR11C_MM	-1.09896	0.000621758	7.38296
RLTR11D	-0.351255	0.171158	1.76517
RLTR12A	-0.301905	0.216183	1.53163
RLTR12B	-1.03116	3.88883e-05	10.1548
RLTR12B2	-0.667821	0.286616	1.24961
RLTR12BD_Mm	-0.617607	0.0088432	4.72811
RLTR12C	0.634841	6.17606e-08	16.6
RLTR12D	0.362115	0.0366364	3.30671
RLTR12E	-0.525821	0.0217228	3.82939
RLTR12F	-2.01788	0.34277	1.0707
RLTR12G	0.028113	0.93201	0.0704118
RLTR12H	-0.569391	0.127769	2.05753
RLTR13A	-0.444479	0.254805	1.36726
RLTR13A1	0.299409	0.348677	1.05361
RLTR13A2	-0.417114	0.284451	1.25719
RLTR13A3	-1.10771	0.00032963	8.01754
RLTR13B1	-1.09663	0.000104677	9.16463
RLTR13B2	-0.526613	0.159785	1.83393
RLTR13B3	-1.51761	3.21061e-06	12.649
RLTR13B4	-0.189408	0.635479	0.453377
RLTR13C1	0.347968	0.0279392	3.57772
RLTR13C2	-0.546892	0.0241655	3.72283
RLTR13C3	-0.201127	0.705117	0.349392
RLTR13D	-1.60399	0.271395	1.30418
RLTR13D1	-1.19607	0.00736273	4.91132
RLTR13D2	0.142005	0.549651	0.598472
RLTR13D3	0.0737657	0.799387	0.22391
RLTR13D3A	-1.66809	7.21644e-05	9.53656
RLTR13D3A1	-0.571093	0.000563366	7.48158
RLTR13D4	-1.24417	0.0780702	2.55015
RLTR13D5	0.156815	0.53417	0.627042
RLTR13D6	-0.754845	0.0521155	2.95429
RLTR13E	-0.458273	0.027182	3.6052
RLTR13F	0.0325162	0.966092	0.0344958
RLTR13G	-0.709034	0.0236821	3.74304
RLTR14	-0.338266	0.114248	2.16938
RLTR14_RN	0.206654	0.14707	1.91685
RLTR14-int	0.432768	0.00245629	6.0091
RLTR15	0.245312	0.0197526	3.92447
RLTR16	0.432502	0.00670046	5.00558
RLTR16B_MM	-0.46446	0.0808405	2.51528
RLTR16C_MM	-0.493107	0.314748	1.15598
RLTR17	0.67894	4.09005e-10	21.6173
RLTR17B_Mm	0.172506	0.241897	1.41924
RLTR17C_Mm	0.131829	0.874421	0.134193
RLTR17D_Mm	-1.10574	7.22167e-07	14.141
RLTR18	0.563197	0.000745115	7.20197
RLTR18-int	-0.742609	0.000128112	8.9626
RLTR18B	0.0288366	0.85677	0.154586
RLTR19	-0.43306	0.161856	1.82105
RLTR19-int	0.479839	0.00411183	5.49389
RLTR19A	0.795393	0.00131318	6.63531
RLTR19A2	-0.146024	0.891596	0.114742
RLTR19B	-0.393766	0.348037	1.05545
RLTR19C	-1.44124	2.4939e-08	17.5068
RLTR19D	1.50188	0.162939	1.81438
RLTR1A2_MM	-0.168654	0.662177	0.412223
RLTR1B	-1.15596	4.4799e-05	10.0133
RLTR1B-int	0.560348	1.33894e-05	11.2211
RLTR1C	-0.361501	0.175885	1.73793
RLTR1D	-0.329769	0.278958	1.27669
RLTR1D2_MM	-0.702222	0.147699	1.91258
RLTR1E_MM	-1.77185	0.108833	2.21794
RLTR1F_Mm	1.01122	0.270688	1.30679
RLTR20A	-1.29329	4.14879e-06	12.3927
RLTR20A1	-1.18036	0.275215	1.2902
RLTR20A2	0.607087	0.00316219	5.75649
RLTR20A2B_MM	-1.24557	0.0049211	5.31422
RLTR20A3_MM	-1.02069	0.00232396	6.06448
RLTR20A4	0.794262	4.81994e-06	12.2427
RLTR20B1	-0.82196	0.00433858	5.44021
RLTR20B2	-0.488144	0.0596206	2.81975
RLTR20B3	-1.19698	4.93927e-08	16.8235
RLTR20B3A_MM	0.126594	0.667701	0.403916
RLTR20B4_MM	-1.56114	3.43231e-08	17.1874
RLTR20B5_MM	-0.889889	0.000110016	9.11488
RLTR20C	-0.304041	0.456133	0.784971
RLTR20C1_MM	-0.00771884	0.976198	0.0240899
RLTR20C2_MM	-0.12392	0.542304	0.611929
RLTR20D	-0.76607	0.00118042	6.74189
RLTR21	-0.559142	0.0257759	3.65831
RLTR22_Mur	0.392458	0.0238889	3.73434
RLTR22_Mus	0.228272	0.127769	2.05753
RLTR23	0.868399	0.000499721	7.60146
RLTR24	-0.0299635	0.920432	0.0829125
RLTR24B_MM	-1.42447	2.7271e-09	19.72
RLTR25A	-0.44706	0.054252	2.91412
RLTR25B	-0.0309016	0.89842	0.107118
RLTR26	0.545341	0.0132306	4.32523
RLTR26_Mus	-0.305788	0.0254003	3.67299
RLTR26B_MM	-0.406682	0.165855	1.79664
RLTR26C_MM	-1.00874	1.80326e-10	22.4363
RLTR26D_MM	-0.321728	0.213141	1.5458
RLTR27	0.719725	0.0204109	3.89169
RLTR28	0.369031	0.059563	2.82072
RLTR28B	-0.193292	0.220982	1.50967
RLTR3_Mm	0.469341	0.197611	1.62146
RLTR30	-0.460748	0.047924	3.03814
RLTR30B_MM	-0.0704003	0.856733	0.154628
RLTR30C_MM	-0.597293	0.51124	0.670917
RLTR30D_MM	-0.0371444	0.962317	0.0384116
RLTR30D_RN	-1.94882	1.46889e-11	24.9439
RLTR30D2_MM	-0.291977	0.284675	1.25641
RLTR30E_MM	-1.86742	1.7192e-05	10.9711
RLTR31_Mm	0.20811	0.359142	1.02404
RLTR31_Mur	-0.0825443	0.799387	0.22391
RLTR31A_Mm	-0.631174	0.21088	1.55647
RLTR31B_Mm	-0.459868	0.344139	1.06671
RLTR31B2	0.413132	1.54162e-05	11.0801
RLTR31C_MM	-0.46519	0.0485432	3.0253
RLTR31D_MM	0.318475	0.15984	1.83358
RLTR31M	-0.0391487	0.92333	0.0797689
RLTR33	0.280393	0.023051	3.77005
RLTR34B_MM	-0.0155898	0.976198	0.0240899
RLTR34C_MM	-0.973192	0.000234541	8.35788
RLTR34D_MM	1.18182	1.79429e-10	22.4412
RLTR35B_MM	-0.84062	0.0256435	3.66347
RLTR4_Mm	-0.813433	0.00686636	4.98112
RLTR4_MM-int	-0.408824	0.123455	2.09188
RLTR40	-0.176378	0.205942	1.58016
RLTR41	0.597569	0.0281509	3.57018
RLTR41A2	-0.0431328	0.945927	0.0555904
RLTR41B	0.902469	0.00245629	6.0091
RLTR41C	0.0113076	0.952744	0.0484091
RLTR42	-0.21651	0.497505	0.69815
RLTR42-int	0.187097	0.397515	0.922522
RLTR43A	NA	NA	NA
RLTR43B	NA	NA	NA
RLTR43C	1.4815	0.000891043	7.02312
RLTR44-int	0.174267	0.440398	0.820077
RLTR44A	-0.554049	0.0402854	3.21177
RLTR44B	-1.24226	0.056802	2.86818
RLTR44C	0.0181105	0.953322	0.0478028
RLTR44D	2.00117	0.0024295	6.02007
RLTR44E	-1.20907	0.12813	2.05471
RLTR45	0.832815	0.000452259	7.70126
RLTR45-int	0.587128	0.0347775	3.35878
RLTR46	1.06095	NA	NA
RLTR46A	2.18842	0.232943	1.45696
RLTR46A2	0.740274	0.689448	0.371864
RLTR46B	1.64907	5.84089e-21	46.5894
RLTR47	-0.154384	0.774831	0.255111
RLTR47_MM	-0.751004	0.671363	0.398445
RLTR48A	-0.554802	0.0130562	4.33849
RLTR48B	-0.923127	0.104511	2.25847
RLTR48C	-0.389451	0.402298	0.910563
RLTR49	0.96656	2.56362e-12	26.6896
RLTR5_Mm	-1.58309	2.42199e-09	19.8387
RLTR50A	3.75088	NA	NA
RLTR50B	-1.07843	0.0493819	3.00817
RLTR51A_Mm	0.267502	0.294703	1.22179
RLTR51B_Mm	-0.0146481	0.957909	0.0430022
RLTR53_Mm	-0.734484	0.00171165	6.3703
RLTR53B_Mm	-0.941046	0.142491	1.94847
RLTR6_Mm	2.03576	6.89433e-33	74.0546
RLTR6-int	-0.372382	0.158193	1.84394
RLTR6B_Mm	0.323205	0.33073	1.10645
RLTR6C_Mm	1.41559	2.5266e-11	24.4016
RLTR8	-0.0983	0.71279	0.338568
RLTR9A	-0.356004	0.122417	2.10032
RLTR9A2	0.18723	0.896975	0.108727
RLTR9A3	0.144135	0.623918	0.471736
RLTR9A3A	-0.779941	0.406697	0.899687
RLTR9A3B	-1.05087	0.284675	1.25641
RLTR9A4	1.08123	0.687665	0.374453
RLTR9B	-1.74237	5.44969e-05	9.81737
RLTR9B2	-0.95763	0.354793	1.03622
RLTR9C	-0.886249	0.0627345	2.76884
RLTR9D	0.314508	0.188323	1.6696
RLTR9D2	-0.465584	0.229664	1.47114
RLTR9E	-0.0889891	0.659466	0.416325
RLTR9F	-0.132022	0.680503	0.384923
RLTRETN_Mm	-0.718425	0.000531744	7.53935
RMER10A	0.385931	0.000215657	8.44182
RMER10B	-0.0157847	0.961912	0.0388325
RMER12	0.64278	4.74487e-09	19.1662
RMER12B	-1.17904	2.42199e-09	19.8387
RMER12C	0.0401466	0.920432	0.0829125
RMER13A	-1.39532	1.89738e-09	20.0828
RMER13A1	-0.227883	0.311298	1.16701
RMER13A2	0.135055	0.571393	0.559679
RMER13B	-0.560643	0.0239194	3.73307
RMER15	-0.025655	0.890548	0.115919
RMER15-int	-0.14828	0.293246	1.22674
RMER16	-0.854641	0.0233808	3.75584
RMER16_Mm	-1.32953	0.00190345	6.26409
RMER16-int	1.7106	3.74311e-52	118.415
RMER16A2	-0.312272	0.533551	0.6282
RMER16A3	-0.458098	0.566691	0.56794
RMER16B	-1.57759	0.212594	1.54837
RMER16B2	-0.387044	0.277021	1.28366
RMER16B3	0.023484	0.966295	0.0342856
RMER16C	1.3737	1.70186e-09	20.1915
RMER17A	-0.130297	0.366091	1.00487
RMER17A-int	-0.742869	0.0346742	3.36176
RMER17A2	-0.981195	0.000139892	8.87464
RMER17B	-0.947209	3.43612e-11	24.0941
RMER17B2	-2.70412	6.49608e-16	34.9702
RMER17C	-0.411646	0.0112323	4.48896
RMER17C-int	-0.478906	0.0098365	4.62166
RMER17C2	0.231478	0.114339	2.16859
RMER17D	0.817901	3.48488e-12	26.3826
RMER17D2	-1.55105	2.32406e-16	35.998
RMER19A	-0.565931	1.19089e-07	15.9434
RMER19B	-0.0738915	0.796463	0.227575
RMER19B2	-0.126425	0.565813	0.569492
RMER19C	0.777695	3.82469e-06	12.474
RMER1A	-0.318657	0.026062	3.64728
RMER1B	0.456176	1.71223e-07	15.5803
RMER1C	-0.00685101	0.976198	0.0240899
RMER2	-0.739011	0.000196962	8.5325
RMER20A	-0.625607	1.02783e-05	11.4855
RMER20B	0.0706923	0.720995	0.327124
RMER20C_Mm	-0.633569	0.000519299	7.56303
RMER21A	0.446697	8.60025e-08	16.2689
RMER21B	-0.295502	0.192848	1.64585
RMER30	0.0934398	0.723879	0.323131
RMER3D-int	-0.473412	0.000135233	8.90851
RMER3D1	NA	NA	NA
RMER3D2	NA	NA	NA
RMER3D3	2.02275	NA	NA
RMER3D4	-2.40101	0.315772	1.15273
RMER4A	-0.400996	0.000694529	7.27228
RMER4B	0.210843	0.038896	3.24686
RMER5	0.00763841	0.957449	0.0434833
RMER6-int	0.0916278	0.749483	0.288371
RMER6A	-0.276701	0.144227	1.93637
RMER6B	-0.833284	1.22288e-06	13.6143
RMER6BA	-0.645591	0.00818539	4.8054
RMER6C	1.10935	1.91999e-12	26.9787
RMER6D	1.44823	1.74003e-22	50.103
RNERVK23-int	-1.62262	6.05323e-06	12.0149
RNLTR23	0.568479	0.327814	1.11531
RodERV21-int	-0.708905	0.000121524	9.0154
RSINE1	0.0442967	0.686629	0.375961
SRV_MM-int	0.456673	0.0406925	3.20171
SSU-rRNA_Hsa	-0.00616971	0.994122	0.00589564
SUBTEL_sa	1.33089	0.0658927	2.71973
SYNREP_MM	-1.26305	0.441477	0.817628
T-rich	0.3796	0.0341041	3.37834
Tigger1	0.688354	0.00515863	5.26708
Tigger10	0.39001	0.000110585	9.10973
Tigger11a	0.734055	0.287094	1.24795
Tigger12	0.275282	0.254805	1.36726
Tigger12A	-0.641771	0.238195	1.43467
Tigger12c	-0.23611	0.704054	0.3509
Tigger13a	-1.13036	1.83437e-06	13.2088
Tigger14a	1.04376	2.66755e-08	17.4395
Tigger15a	0.0486749	0.848961	0.163742
Tigger16a	-1.97631	1.24975e-10	22.8029
Tigger16b	1.13805	2.22842e-17	38.3427
Tigger17	-0.392274	0.069236	2.67023
Tigger17a	-0.126387	0.445069	0.809526
Tigger17b	-0.134731	0.802097	0.220526
Tigger17c	-0.938185	0.0116813	4.44977
Tigger18a	-1.29918	0.00032963	8.01754
Tigger19a	0.784542	1.99336e-06	13.1257
Tigger1a_Art	-1.84516	0.0355717	3.3362
Tigger1a_Mars	NA	NA	NA
Tigger20a	-0.157552	0.509026	0.675257
Tigger2b	-1.46741	0.00217586	6.13033
Tigger5	0.203357	0.263303	1.33445
Tigger5b	-0.908851	3.41986e-08	17.1911
Tigger6a	0.621029	0.0215023	3.83959
Tigger6b	-0.820557	0.0561618	2.87952
Tigger7	-0.80428	3.38213e-19	42.5306
Tigger8	-0.197231	0.606322	0.500345
Tigger9a	-2.422	9.1489e-06	11.6019
Tigger9b	0.182607	0.568168	0.565337
tRNA-Ala-GCA	-0.0236995	0.914368	0.0895216
tRNA-Ala-GCG	-0.712214	0.161587	1.82271
tRNA-Ala-GCY	-0.580154	NA	NA
tRNA-Ala-GCY_	0.195135	0.0432411	3.14096
tRNA-Arg-AGA	-3.08425	0.0968389	2.33471
tRNA-Arg-AGG	-0.252139	0.950352	0.0509232
tRNA-Arg-CGA	0.0991578	NA	NA
tRNA-Arg-CGA_	-0.480309	0.788558	0.237549
tRNA-Arg-CGG	-2.78147	NA	NA
tRNA-Arg-CGY_	-1.11745	0.521636	0.650785
tRNA-Asn-AAC	0.133855	0.951158	0.050075
tRNA-Asp-GAY	-2.99793	0.00712181	4.94459
tRNA-Cys-TGY	-2.50873	NA	NA
tRNA-Gln-CAA	0.269198	0.920432	0.0829125
tRNA-Gln-CAA_	-1.8594	0.000198896	8.52273
tRNA-Gln-CAG	1.19767	0.675079	0.392926
tRNA-Glu-GAA	1.06095	NA	NA
tRNA-Glu-GAG	-2.69235	0.123546	2.09114
tRNA-Glu-GAG_	-1.42502	0.249821	1.38701
tRNA-Gly-GGA	0.495925	0.0154949	4.16724
tRNA-Gly-GGG	NA	NA	NA
tRNA-Gly-GGY	-1.14054	0.161942	1.82052
tRNA-His-CAY	0.0991578	NA	NA
tRNA-His-CAY_	0.958922	0.531697	0.631681
tRNA-Ile-ATA	-2.38673	0.295962	1.21752
tRNA-Ile-ATT	-1.53542	0.412523	0.885464
tRNA-Leu-CTA	NA	NA	NA
tRNA-Leu-CTA_	0.397191	NA	NA
tRNA-Leu-CTG	-1.78224	NA	NA
tRNA-Leu-CTY	-0.834176	NA	NA
tRNA-Leu-TTA	1.27295	0.184446	1.6904
tRNA-Leu-TTA(m)	-2.46543	3.49624e-06	12.5638
tRNA-Leu-TTG	2.77311	NA	NA
tRNA-Lys-AAA	-2.51554	0.193057	1.64477
tRNA-Lys-AAG	-2.21515	0.151804	1.88516
tRNA-Met	-1.28117	NA	NA
tRNA-Met_	-0.0833162	NA	NA
tRNA-Met-i	-2.39324	NA	NA
tRNA-Phe-TTY	-0.129848	0.947972	0.0534306
tRNA-Pro-CCA	-3.08275	0.171783	1.76152
tRNA-Pro-CCG	NA	NA	NA
tRNA-Pro-CCY	-0.0315115	0.99003	0.0100199
tRNA-SeC(e)-TGA	-0.509412	NA	NA
tRNA-Ser-AGY	-1.57069	0.42199	0.862774
tRNA-Ser-TCA	NA	NA	NA
tRNA-Ser-TCA_	-1.00419	NA	NA
tRNA-Ser-TCA(m)	-3.11987	4.38971e-15	33.0595
tRNA-Ser-TCG	-2.22339	NA	NA
tRNA-Ser-TCY	-1.3435	0.119877	2.12129
tRNA-Thr-ACA	0.0991581	NA	NA
tRNA-Thr-ACG	-1.24107	NA	NA
tRNA-Thr-ACG_	-3.03802	NA	NA
tRNA-Thr-ACY	0.359442	0.883427	0.123947
tRNA-Thr-ACY_	0.0991583	NA	NA
tRNA-Trp-TGG	-0.548603	0.746879	0.291852
tRNA-Tyr-TAC	-1.60368	0.0877454	2.43332
tRNA-Tyr-TAT	NA	NA	NA
tRNA-Val-GTA	-1.92873	0.351164	1.0465
tRNA-Val-GTG	-0.734222	0.750821	0.286588
tRNA-Val-GTY	-2.56701	0.347425	1.05721
U1	-1.32204	1.62512e-06	13.3299
U13	-0.797189	0.351595	1.04527
U13_	0.822507	0.0191236	3.95683
U14	-1.61865	0.000225722	8.39621
U17	-1.87815	0.00493454	5.3115
U2	0.465622	4.19767e-05	10.0784
U3	-0.0294308	0.969875	0.0305881
U4	-0.512473	0.0311079	3.47029
U5	1.10782	8.75041e-06	11.6464
U6	-0.34069	0.0049211	5.31422
U7	-0.230332	0.755155	0.280833
U8	-1.51034	NA	NA
UCON1	-0.167868	0.966092	0.0344958
UCON10	1.44663	0.361081	1.01865
UCON11	-0.548476	NA	NA
UCON12	2.80042	NA	NA
UCON12A	-0.854638	0.799263	0.224066
UCON13	0.0991584	NA	NA
UCON14	0.17977	0.586086	0.534289
UCON15	1.06095	NA	NA
UCON16	2.5947	0.365968	1.00521
UCON17	2.8486	NA	NA
UCON18	0.359278	0.920634	0.0826928
UCON19	NA	NA	NA
UCON2	0.600213	0.00985103	4.62018
UCON20	-2.19471	0.0175222	4.04428
UCON21	-1.42838	0.241854	1.41942
UCON22	1.21407	NA	NA
UCON23	1.14317	8.48585e-06	11.6771
UCON24	NA	NA	NA
UCON25	1.06095	NA	NA
UCON26	-1.27983	0.327465	1.11637
UCON27	-1.34497	NA	NA
UCON28a	-2.21948	0.079755	2.5288
UCON28b	0.131198	0.96694	0.0336189
UCON28c	-1.59047	NA	NA
UCON29	0.0520224	0.89842	0.107118
UCON31	0.220725	0.941082	0.0607255
UCON4	0.0256454	0.92648	0.076363
UCON5	2.45159	0.00546275	5.2098
UCON6	-0.374105	0.0953569	2.35013
UCON7	-0.443798	0.466435	0.762637
UCON8	-3.42911	0.0401663	3.21473
UCON9	2.86815	NA	NA
URR1A	-0.157501	0.0936254	2.36845
URR1B	0.120504	0.0865469	2.44707
X1_LINE	3.97875	0.0794106	2.53312
X2_LINE	3.79337	0.134599	2.00546
X3_LINE	0.20471	0.334701	1.09452
X5A_LINE	-0.303968	0.81427	0.205464
X5B_LINE	1.53345	5.6595e-17	37.4106
X6A_LINE	1.14365	3.26556e-08	17.2372
X6B_LINE	0.19329	0.344139	1.06671
X7A_LINE	2.9051	8.23694e-128	292.622
X7B_LINE	0.0293331	0.920634	0.0826928
X7C_LINE	-0.513461	0.264253	1.33085
X7D_LINE	-0.559845	NA	NA
X8_LINE	0.566434	0.0205871	3.88309
X9_LINE	0.294774	0.177727	1.72751
YREP_Mm	1.11765	1.19089e-07	15.9434
Zaphod	0.284934	0.543333	0.610032
Zaphod2	-0.0815419	0.665231	0.407622
Zaphod3	-1.25266	0.000435473	7.73908
ZP3AR	0.273403	0.142184	1.95063

## Sheet: Extended Data Table 5
	Extended Data Table 5: Top 1,000 differential expressed retroelement loci from RNA-seq analysis of YUMMER1.7 with Kdm5b sg vs Ctl
row	loci	log2FoldChange.sgKDM5B_vs_sgCtrl	padj.sgKDM5B_vs_sgCtrl	neglogp.sgKDM5B_vs_sgCtrl	toptenName.sgKDM5B_vs_sgCtrl
MMVL30-int_chr4-12133726-12137565	chr4:12133726-12137565	7.27064	4.01554e-132	302.551	MMVL30-int_chr4-12133726-12137565
B1_Mur4_chr2-152110443-152110595	chr2:152110443-152110595	3.76866	1.01723e-114	262.478	B1_Mur4_chr2-152110443-152110595
MLT1H_chr2-152109993-152110319	chr2:152109993-152110319	3.80634	8.02881e-110	251.201	MLT1H_chr2-152109993-152110319
MTD_chr19-34649722-34650060	chr19:34649722-34650060	4.90088	2.83985e-85	194.676	MTD_chr19-34649722-34650060
GA-rich_chr11-98771879-98771929	chr11:98771879-98771929	3.31661	1.75238e-73	167.528	GA-rich_chr11-98771879-98771929
MMVL30-int_chr19-4061914-4065815	chr19:4061914-4065815	3.15025	2.26411e-73	167.272	MMVL30-int_chr19-4061914-4065815
RSINE1_chr10-117689540-117689717	chr10:117689540-117689717	2.80313	4.53368e-66	150.459	RSINE1_chr10-117689540-117689717
B3_chr2-152110327-152110417	chr2:152110327-152110417	3.62851	7.22562e-66	149.993	B3_chr2-152110327-152110417
MMVL30-int_chr13-68233439-68235807	chr13:68233439-68235807	4.31831	4.14377e-65	148.246	MMVL30-int_chr13-68233439-68235807
X7A_LINE_chr10-82896936-82896973	chr10:82896936-82896973	2.95972	4.86952e-61	138.875	X7A_LINE_chr10-82896936-82896973
ORR1F_chr6-121270643-121270767	chr6:121270643-121270767	5.99113	7.5864e-61	138.431
MLT1A1_chr19-44306281-44306423	chr19:44306281-44306423	-3.84628	1.8554e-55	126.024
AT_rich_chr1-150107968-150108024	chr1:150107968-150108024	2.98384	5.17637e-55	124.998
B1_Mm_chr14-31508125-31508242	chr14:31508125-31508242	2.83092	1.84835e-53	121.423
(TA)n_chr17-34956866-34956917	chr17:34956866-34956917	6.93825	1.19527e-52	119.556
MER89_chr5-114937698-114937939	chr5:114937698-114937939	6.94228	3.75317e-50	113.807
MIRb_chr19-44306424-44306541	chr19:44306424-44306541	-3.89978	3.75317e-50	113.807
MMVL30-int_chr13-68297861-68300626	chr13:68297861-68300626	4.29878	8.89636e-50	112.944
MMVL30-int_chr2-23010331-23013175	chr2:23010331-23013175	3.9669	5.36455e-48	108.844
(TG)n_chr8-83611495-83611546	chr8:83611495-83611546	3.54437	7.02061e-46	103.97
PB1D9_chr16-17130172-17130291	chr16:17130172-17130291	3.72956	4.49121e-44	99.8116
MIR_chr11-48868743-48868836	chr11:48868743-48868836	4.42088	4.95269e-44	99.7138
AT_rich_chr1-150105795-150105845	chr1:150105795-150105845	3.84578	8.98231e-44	99.1185
CT-rich_chr1-186739603-186739669	chr1:186739603-186739669	2.50852	7.12758e-42	94.7446
ERVL-E-int_chr17-82399051-82399145	chr17:82399051-82399145	4.6811	7.12758e-42	94.7446
MMVL30-int_chr2-75638671-75642371	chr2:75638671-75642371	2.2572	9.57111e-42	94.4498
(TG)n_chr19-34613217-34613274	chr19:34613217-34613274	6.35563	4.11432e-41	92.9915
CT-rich_chr8-84842676-84842793	chr8:84842676-84842793	2.20926	1.08245e-40	92.0242
RMER16-int_chr17-82400083-82401215	chr17:82400083-82401215	3.76618	2.18763e-40	91.3206
MMVL30-int_chr13-68213755-68217582	chr13:68213755-68217582	5.86166	5.72137e-40	90.3592
(TG)n_chr12-112513563-112513688	chr12:112513563-112513688	3.79853	1.68533e-39	89.2789
B4_chr5-139473151-139473401	chr5:139473151-139473401	3.13895	3.9577e-39	88.4252
MTE2a_chr2-62597395-62597736	chr2:62597395-62597736	3.50404	4.26696e-39	88.3499
B3A_chr5-139471516-139471679	chr5:139471516-139471679	2.66205	1.67557e-37	84.6795
MMSAT4_chr17-21560488-21562063	chr17:21560488-21562063	2.36487	2.20739e-36	82.1013
(TCC)n_chr15-102462172-102462197	chr15:102462172-102462197	2.53934	6.18362e-36	81.0712
(CTG)n_chr10-117694931-117694969	chr10:117694931-117694969	3.29522	7.66837e-35	78.5534
(CTCG)n_chr19-44305839-44305868	chr19:44305839-44305868	-3.54302	7.9501e-35	78.5173
(CA)n_chr13-16027665-16027836	chr13:16027665-16027836	2.81995	9.06163e-35	78.3864
Lx_chr17-78853113-78854280	chr17:78853113-78854280	2.78612	1.19994e-34	78.1056
IAPEY4_I-int_chr8-72025108-72032756	chr8:72025108-72032756	2.71944	1.74985e-34	77.7284
B1_Mus1_chr5-139472557-139472675	chr5:139472557-139472675	2.94296	9.98836e-34	75.9865
MMVL30-int_chr13-55185024-55188682	chr13:55185024-55188682	3.1998	1.00917e-33	75.9762
A-rich_chr12-111541724-111541774	chr12:111541724-111541774	2.06957	7.99675e-33	73.9063
L1MA6_chr18-66464885-66465152	chr18:66464885-66465152	2.89114	9.2789e-33	73.7576
MMVL30-int_chr13-68235880-68236581	chr13:68235880-68236581	4.15348	1.0918e-32	73.5949
(CAAAA)n_chr17-29099563-29099606	chr17:29099563-29099606	2.72729	3.87459e-32	72.3283
ZP3AR_chr5-139471355-139471490	chr5:139471355-139471490	2.30884	3.91359e-31	70.0157
AT_rich_chr1-153908786-153908831	chr1:153908786-153908831	2.91648	4.27646e-31	69.927
MMERVK10D3_I-int_chrX-53911074-53914099	chrX:53911074-53914099	4.52926	1.47652e-30	68.6879
RLTR6_Mm_chr2-75638102-75638671	chr2:75638102-75638671	2.45496	2.26339e-30	68.2607
CT-rich_chr12-110694154-110694217	chr12:110694154-110694217	2.56586	2.40881e-30	68.1984
AT_rich_chr1-150107184-150107221	chr1:150107184-150107221	3.2893	3.70825e-30	67.767
(GAA)n_chr17-82398634-82398712	chr17:82398634-82398712	4.51533	5.06053e-30	67.4561
ORR1E_chr9-18313745-18314042	chr9:18313745-18314042	2.05424	5.08425e-30	67.4514
MMVL30-int_chr11-86812240-86815876	chr11:86812240-86815876	2.46765	5.75653e-30	67.3272
PB1D9_chr19-44304019-44304137	chr19:44304019-44304137	-3.30368	1.83251e-29	66.1693
(TTTC)n_chr2-118125934-118125975	chr2:118125934-118125975	2.55512	6.46703e-29	64.9083
PB1D7_chr5-4082151-4082242	chr5:4082151-4082242	-3.76289	1.09984e-28	64.3772
(TG)n_chr10-117689504-117689540	chr10:117689504-117689540	2.93872	1.75373e-28	63.9106
Lx_chr4-50123671-50124239	chr4:50123671-50124239	5.47827	1.77001e-28	63.9014
(ATG)n_chr5-104439303-104439334	chr5:104439303-104439334	-3.22251	5.23385e-28	62.8172
B2_Mm2_chr11-48865381-48865538	chr11:48865381-48865538	2.808	2.5064e-27	61.251
B1_Mur1_chr4-40204887-40205005	chr4:40204887-40205005	2.55522	3.01794e-27	61.0652
B2_Mm2_chr11-6525600-6525785	chr11:6525600-6525785	2.91983	3.98966e-27	60.7861
L1MD3_chr2-152111247-152111348	chr2:152111247-152111348	3.07043	4.75252e-27	60.6111
MT2B2_chr11-84511367-84511588	chr11:84511367-84511588	2.26261	4.8554e-27	60.5897
L3_chr1-186721464-186721548	chr1:186721464-186721548	2.23902	4.92241e-27	60.576
RLTR11A_chr17-34996673-34997136	chr17:34996673-34997136	-2.42954	7.52299e-27	60.1518
MMVL30-int_chr13-68237007-68237777	chr13:68237007-68237777	4.7391	1.09764e-26	59.7741
MTC_chr5-4081718-4082108	chr5:4081718-4082108	-3.06023	1.64419e-26	59.37
(GAAAA)n_chr19-34649480-34649599	chr19:34649480-34649599	5.4455	1.72382e-26	59.3227
L1MA6_chr18-66464340-66464438	chr18:66464340-66464438	3.26165	2.09073e-26	59.1297
GA-rich_chr15-25985130-25985169	chr15:25985130-25985169	2.47385	2.12904e-26	59.1115
L1MA6_chr18-66464533-66464835	chr18:66464533-66464835	3.18577	2.41014e-26	58.9875
MTC_chr6-43392157-43392583	chr6:43392157-43392583	2.47709	2.41014e-26	58.9875
MMVL30-int_chr2-177252875-177255764	chr2:177252875-177255764	5.03162	3.09937e-26	58.736
ID4_chr4-14810389-14810465	chr4:14810389-14810465	2.07914	4.29331e-26	58.4102
L2b_chr9-109833264-109833369	chr9:109833264-109833369	2.4396	4.81564e-26	58.2953
Lx10_chr6-135314558-135314798	chr6:135314558-135314798	5.19847	7.42731e-26	57.862
(CTG)n_chr2-155751412-155751437	chr2:155751412-155751437	3.9611	1.0201e-25	57.5447
MTE2b_chr1-150076703-150077079	chr1:150076703-150077079	3.02486	3.56041e-25	56.2948
MMVL30-int_chr6-41197706-41200061	chr6:41197706-41200061	2.8539	4.89561e-25	55.9763
MIRb_chr1-87214383-87214524	chr1:87214383-87214524	2.41378	6.21072e-25	55.7384
MTE-int_chr17-78852674-78852924	chr17:78852674-78852924	2.52631	6.97542e-25	55.6222
URR1B_chr7-78907443-78907670	chr7:78907443-78907670	1.89759	7.933e-25	55.4936
GA-rich_chr5-120122987-120123063	chr5:120122987-120123063	2.57494	9.70765e-25	55.2917
MER5A_chr5-114911866-114912023	chr5:114911866-114912023	3.49503	1.08847e-24	55.1773
B1_Mur2_chr11-89017161-89017290	chr11:89017161-89017290	2.59214	2.00792e-24	54.5649
MurSatRep1_chr17-21557126-21557267	chr17:21557126-21557267	2.80603	2.65968e-24	54.2838
MMSAT4_chr18-24002818-24004341	chr18:24002818-24004341	1.94437	4.4971e-24	53.7586
(CA)n_chr19-20375811-20375901	chr19:20375811-20375901	-3.58921	1.07434e-23	52.8877
B1F_chr8-107058635-107058750	chr8:107058635-107058750	1.92664	1.34817e-23	52.6607
(CAT)n_chr11-33159936-33159981	chr11:33159936-33159981	1.54657	1.75062e-23	52.3995
CT-rich_chr12-110694254-110694301	chr12:110694254-110694301	2.86028	2.0643e-23	52.2347
GA-rich_chr17-71657484-71657593	chr17:71657484-71657593	1.73996	3.07415e-23	51.8364
RMER17B2_chr3-19992735-19992869	chr3:19992735-19992869	-5.4806	3.0748e-23	51.8362
CT-rich_chr9-44391490-44391554	chr9:44391490-44391554	2.14322	3.15232e-23	51.8113
GA-rich_chr9-119977079-119977152	chr9:119977079-119977152	3.77848	3.40246e-23	51.735
B1_Mus1_chr5-114911489-114911609	chr5:114911489-114911609	3.95251	3.5279e-23	51.6988
7SLRNA_chr1-185356845-185356936	chr1:185356845-185356936	2.23578	4.25647e-23	51.511
A-rich_chr2-122041594-122041662	chr2:122041594-122041662	2.19896	4.32647e-23	51.4947
(TTC)n_chr8-31161722-31161760	chr8:31161722-31161760	2.05066	8.96115e-23	50.7666
MER117_chrX-94535547-94535696	chrX:94535547-94535696	-2.05066	1.1167e-22	50.5465
AT_rich_chr10-82897453-82897484	chr10:82897453-82897484	2.34708	1.80683e-22	50.0653
B1F2_chr8-111311798-111311925	chr8:111311798-111311925	2.01621	2.20237e-22	49.8673
MMVL30-int_chr6-41200136-41201548	chr6:41200136-41201548	2.95092	2.46722e-22	49.7538
MMSAT4_chr4-145449608-145450880	chr4:145449608-145450880	1.91105	2.63973e-22	49.6862
ID4_chr1-156052343-156052453	chr1:156052343-156052453	1.80374	3.66741e-22	49.3574
L1MB8_chr6-135311720-135312367	chr6:135311720-135312367	3.76502	3.74415e-22	49.3367
L1Md_F2_chr8-66474318-66475049	chr8:66474318-66475049	2.56975	4.32264e-22	49.193
MTD_chr2-26891294-26891651	chr2:26891294-26891651	1.83828	8.76992e-22	48.4855
MMSAT4_chr7-41626083-41627562	chr7:41626083-41627562	1.90465	1.73197e-21	47.805
L1Md_F2_chr4-156199459-156199545	chr4:156199459-156199545	4.08734	1.96349e-21	47.6796
GA-rich_chr7-133709428-133709482	chr7:133709428-133709482	1.97911	2.31092e-21	47.5166
B1_Mur4_chr1-40464717-40464829	chr1:40464717-40464829	3.47274	3.01017e-21	47.2523
(TTA)n_chr13-110400228-110400255	chr13:110400228-110400255	3.23043	3.70425e-21	47.0448
MTD_chr19-38789220-38789455	chr19:38789220-38789455	1.966	6.38772e-21	46.4999
(TG)n_chr5-139473070-139473151	chr5:139473070-139473151	3.21082	7.02721e-21	46.4045
(TCC)n_chr17-34113991-34114033	chr17:34113991-34114033	1.58432	7.1453e-21	46.3878
MMVL30-int_chr4-143976143-143979844	chr4:143976143-143979844	3.57847	8.56913e-21	46.2061
ORR1D1_chr10-83367115-83367439	chr10:83367115-83367439	1.88903	9.14766e-21	46.1408
RLTR6_Mm_chr19-4065815-4066369	chr19:4065815-4066369	3.34133	9.96031e-21	46.0557
(G)n_chr5-137062215-137062250	chr5:137062215-137062250	4.48626	1.12795e-20	45.9313
L1MB7_chr1-37419214-37419388	chr1:37419214-37419388	1.94343	1.13834e-20	45.9221
RLTR6_Mm_chr19-4061377-4061914	chr19:4061377-4061914	2.92915	1.57869e-20	45.5951
(TG)n_chr17-82399769-82399820	chr17:82399769-82399820	4.82735	1.57995e-20	45.5943
MT2B_chr11-116842237-116842354	chr11:116842237-116842354	2.10892	1.7223e-20	45.508
B3_chr12-112512898-112513096	chr12:112512898-112513096	3.19475	1.94613e-20	45.3859
MMVL30-int_chr13-14020834-14024464	chr13:14020834-14024464	3.16465	1.99964e-20	45.3587
RMER19B_chr1-85482465-85483357	chr1:85482465-85483357	6.16806	2.06277e-20	45.3277
L3_chr3-151749073-151749174	chr3:151749073-151749174	4.35274	3.35776e-20	44.8404
MLT2D_chr12-112513139-112513509	chr12:112513139-112513509	3.17414	4.52251e-20	44.5426
PB1D10_chr14-55609170-55609252	chr14:55609170-55609252	3.04333	5.1404e-20	44.4146
MTE2b_chr18-60391346-60391623	chr18:60391346-60391623	4.69987	6.40882e-20	44.194
RMER19B_chr17-35384127-35384353	chr17:35384127-35384353	2.66843	6.5568e-20	44.1712
LTR81B_chr10-82648522-82648606	chr10:82648522-82648606	2.17769	7.89567e-20	43.9854
L1VL4_chr6-43413650-43415966	chr6:43413650-43415966	2.65374	1.06778e-19	43.6835
(TG)n_chr4-152016940-152017075	chr4:152016940-152017075	1.98038	1.07592e-19	43.6759
ORR1A1_chr12-112516540-112516885	chr12:112516540-112516885	3.55697	2.4223e-19	42.8644
MLT1C_chr18-80222641-80223012	chr18:80222641-80223012	2.08783	2.79353e-19	42.7218
MLT1F_chr6-135312921-135313173	chr6:135312921-135313173	3.9551	2.81916e-19	42.7127
IAPEz-int_chr8-22551538-22557922	chr8:22551538-22557922	2.39214	3.43621e-19	42.5147
L1M3_chr1-40465159-40465300	chr1:40465159-40465300	2.74092	4.06737e-19	42.3461
(CCA)n_chr11-100248570-100248627	chr11:100248570-100248627	6.95177	6.62704e-19	41.858
MER57D_chr10-83366120-83366316	chr10:83366120-83366316	1.97686	6.7029e-19	41.8466
(CAGAGA)n_chr16-92085823-92085865	chr16:92085823-92085865	-2.0966	6.85999e-19	41.8234
RMER10A_chr7-143667595-143667910	chr7:143667595-143667910	2.06096	7.45707e-19	41.74
(TTGTG)n_chr14-66803278-66803307	chr14:66803278-66803307	-3.55085	9.80583e-19	41.4661
PB1D7_chr10-21998432-21998525	chr10:21998432-21998525	-4.10897	1.54324e-18	41.0126
B1_Mus2_chr17-46774958-46775104	chr17:46774958-46775104	1.77068	1.58161e-18	40.9881
MER5B_chr3-102509724-102509888	chr3:102509724-102509888	2.93043	1.68153e-18	40.9268
IAPEY4_I-int_chr19-9829173-9836838	chr19:9829173-9836838	3.06537	1.69878e-18	40.9166
B3_chr10-111985131-111985296	chr10:111985131-111985296	1.80058	1.85224e-18	40.8301
MER89_chr13-68228644-68229011	chr13:68228644-68229011	5.15918	1.85224e-18	40.8301
B2_Mm2_chr8-111311549-111311752	chr8:111311549-111311752	2.49808	2.11173e-18	40.699
RSINE1_chr11-40749907-40749996	chr11:40749907-40749996	1.8673	2.78744e-18	40.4214
B1_Mur4_chr18-66464159-66464304	chr18:66464159-66464304	3.34762	3.54915e-18	40.1798
MTE2b_chr11-58221637-58221951	chr11:58221637-58221951	3.25396	3.68108e-18	40.1433
(TCC)n_chr8-107418190-107418215	chr8:107418190-107418215	2.06932	3.83265e-18	40.103
(TC)n_chr6-135313498-135313597	chr6:135313498-135313597	4.0226	5.68109e-18	39.7094
MLT1E1A_chr2-62596643-62596883	chr2:62596643-62596883	3.58249	6.44381e-18	39.5834
ORR1A1-int_chr17-36005365-36006132	chr17:36005365-36006132	2.93581	9.24173e-18	39.2228
AT_rich_chr17-34969765-34969793	chr17:34969765-34969793	6.7086	9.46308e-18	39.1991
L3_chr8-119437186-119437230	chr8:119437186-119437230	2.49456	1.02155e-17	39.1226
MIRb_chr2-13580254-13580394	chr2:13580254-13580394	-3.29193	1.10295e-17	39.046
MTE2a_chr17-12942995-12943194	chr17:12942995-12943194	-2.94397	1.16096e-17	38.9947
B1_Mus1_chr14-46810332-46810481	chr14:46810332-46810481	1.76128	1.17607e-17	38.9818
PB1D11_chr1-161249399-161249476	chr1:161249399-161249476	3.14451	1.25168e-17	38.9195
PB1D9_chr9-21749332-21749439	chr9:21749332-21749439	-2.91218	1.25734e-17	38.9149
MIR3_chr7-126623579-126623708	chr7:126623579-126623708	2.66013	1.91043e-17	38.4966
LTR41B_chr7-143848209-143848449	chr7:143848209-143848449	-2.35891	1.96518e-17	38.4684
MIRb_chr4-106586887-106587057	chr4:106586887-106587057	-2.83805	2.19001e-17	38.36
B4A_chr18-60391698-60391964	chr18:60391698-60391964	3.75958	2.30386e-17	38.3094
MurSatRep1_chr2-177767975-177769557	chr2:177767975-177769557	3.39248	2.44897e-17	38.2483
(CCG)n_chr12-40222868-40222922	chr12:40222868-40222922	3.34535	2.54456e-17	38.21
B1_Mus2_chr1-185357268-185357415	chr1:185357268-185357415	2.08066	3.96535e-17	37.7664
(TCTG)n_chr17-78854725-78854769	chr17:78854725-78854769	2.32372	4.62542e-17	37.6124
ORR1D1_chr14-55609726-55610076	chr14:55609726-55610076	2.55193	4.9018e-17	37.5543
(TG)n_chr15-100260282-100260364	chr15:100260282-100260364	1.88937	5.24081e-17	37.4875
B1F_chr8-109340217-109340355	chr8:109340217-109340355	2.16872	5.46002e-17	37.4465
RMER6A_chr15-10475290-10475930	chr15:10475290-10475930	1.92475	7.67795e-17	37.1056
(TTG)n_chr1-45856398-45856429	chr1:45856398-45856429	5.21834	7.85384e-17	37.0829
CT-rich_chr8-107580886-107580994	chr8:107580886-107580994	1.80478	8.94596e-17	36.9527
ORR1D2-int_chr4-56806993-56807722	chr4:56806993-56807722	1.80287	9.72069e-17	36.8697
(CAT)n_chr1-86357084-86357153	chr1:86357084-86357153	1.62905	1.0612e-16	36.782
MIR3_chr19-5455969-5456082	chr19:5455969-5456082	2.91804	1.0917e-16	36.7536
(CA)n_chr10-62582055-62582081	chr10:62582055-62582081	1.74518	1.14453e-16	36.7064
MLT1M_chr7-105732622-105732880	chr7:105732622-105732880	1.71748	1.14453e-16	36.7064
PB1_chr11-78322215-78322326	chr11:78322215-78322326	-2.18985	2.07865e-16	36.1096
PB1D9_chr9-103364451-103364553	chr9:103364451-103364553	3.23125	2.07865e-16	36.1096
MIRb_chr5-114897857-114897981	chr5:114897857-114897981	4.0549	2.09461e-16	36.102
MurSatRep1_chr2-177388038-177389621	chr2:177388038-177389621	3.14283	2.31512e-16	36.0019
(CAAAA)n_chr18-58008768-58008810	chr18:58008768-58008810	-5.51133	2.61366e-16	35.8806
B1_Mur2_chr11-40750059-40750184	chr11:40750059-40750184	1.99342	2.93527e-16	35.7646
(GA)n_chr17-43612025-43612046	chr17:43612025-43612046	-2.15046	3.08265e-16	35.7156
RSINE1_chr10-127046703-127046859	chr10:127046703-127046859	2.34131	3.70451e-16	35.5318
L1_Rod_chr1-34446446-34446977	chr1:34446446-34446977	2.59187	3.78185e-16	35.5111
B4A_chr8-79684294-79684507	chr8:79684294-79684507	1.41372	4.38332e-16	35.3636
PB1D9_chr17-46775211-46775328	chr17:46775211-46775328	1.54248	5.41978e-16	35.1513
RLTR20A4_chr3-152184791-152184863	chr3:152184791-152184863	2.5275	5.49517e-16	35.1375
(CAT)n_chr1-86356952-86357017	chr1:86356952-86357017	1.55814	6.96563e-16	34.9004
(CAG)n_chr19-46081352-46081377	chr19:46081352-46081377	1.79587	7.27579e-16	34.8568
GA-rich_chr3-122276685-122276735	chr3:122276685-122276735	1.88364	1.03917e-15	34.5004
(CAG)n_chr14-55606355-55606422	chr14:55606355-55606422	3.00989	1.04616e-15	34.4936
MTD_chr14-74750477-74750794	chr14:74750477-74750794	2.7913	1.08323e-15	34.4588
B4A_chr8-47551367-47551623	chr8:47551367-47551623	1.65886	1.10186e-15	34.4418
MurSatRep1_chr16-98008405-98010091	chr16:98008405-98010091	1.97444	1.27063e-15	34.2993
(CTG)n_chr1-34816772-34816807	chr1:34816772-34816807	1.80549	1.44425e-15	34.1712
AT_rich_chr13-60174782-60174824	chr13:60174782-60174824	-3.40424	1.47873e-15	34.1476
L1MB7_chr1-37418692-37418866	chr1:37418692-37418866	1.87182	1.77434e-15	33.9653
(TTTTG)n_chr19-53541368-53541392	chr19:53541368-53541392	2.64769	1.88616e-15	33.9042
Lx8_chr10-83367603-83367958	chr10:83367603-83367958	1.62601	1.99372e-15	33.8488
B3A_chr8-107387583-107387812	chr8:107387583-107387812	2.08011	2.23871e-15	33.7329
(TGGGGG)n_chr6-55348376-55348401	chr6:55348376-55348401	-2.11157	2.61021e-15	33.5793
L1MB8_chr6-135312618-135312817	chr6:135312618-135312817	4.07301	2.75733e-15	33.5245
MMSAT4_chr2-177508538-177509600	chr2:177508538-177509600	2.42433	3.02327e-15	33.4324
(TG)n_chr12-111683448-111683519	chr12:111683448-111683519	1.92743	3.32486e-15	33.3373
Lx8_chr1-176909513-176910227	chr1:176909513-176910227	10.6811	4.34128e-15	33.0706
MMSAT4_chr4-62191178-62192195	chr4:62191178-62192195	2.24254	4.35299e-15	33.0679
(TATATG)n_chr7-46823149-46823179	chr7:46823149-46823179	2.71411	4.8629e-15	32.9571
GA-rich_chr14-65856779-65856882	chr14:65856779-65856882	2.03285	4.92183e-15	32.9451
B1_Mur4_chr19-10942814-10942959	chr19:10942814-10942959	1.92678	4.93547e-15	32.9423
PB1D7_chr11-74818008-74818123	chr11:74818008-74818123	1.74002	4.93547e-15	32.9423
MLT1D_chr12-111454270-111454507	chr12:111454270-111454507	1.27538	5.44147e-15	32.8447
(CA)n_chr7-100319285-100319524	chr7:100319285-100319524	-2.12146	5.55205e-15	32.8246
PB1_chr11-106821523-106821626	chr11:106821523-106821626	1.7844	6.02942e-15	32.7421
GA-rich_chr2-30070452-30070602	chr2:30070452-30070602	1.45799	6.38149e-15	32.6854
MIR3_chr5-145141280-145141401	chr5:145141280-145141401	1.43987	7.188e-15	32.5664
(TCTCTG)n_chr3-108904392-108904497	chr3:108904392-108904497	1.53725	7.26078e-15	32.5563
L2c_chr17-29100536-29100717	chr17:29100536-29100717	1.79313	7.71076e-15	32.4962
RLTR6_Mm_chr11-86815876-86816395	chr11:86815876-86816395	3.37213	8.94197e-15	32.348
L1Md_F2_chr18-60302236-60307427	chr18:60302236-60307427	4.36564	9.13701e-15	32.3264
GA-rich_chr3-84474407-84474540	chr3:84474407-84474540	3.32019	9.71854e-15	32.2647
(TC)n_chr2-160605883-160606245	chr2:160605883-160606245	3.78821	1.04748e-14	32.1898
GA-rich_chr3-158023614-158023730	chr3:158023614-158023730	-2.254	1.05652e-14	32.1812
(TG)n_chr19-34588850-34588909	chr19:34588850-34588909	5.72581	1.31494e-14	31.9624
RLTR6-int_chr12-51310299-51318003	chr12:51310299-51318003	7.23462	1.33356e-14	31.9483
GC_rich_chr4-119294218-119294239	chr4:119294218-119294239	1.69033	1.36852e-14	31.9225
(CAGAGA)n_chr5-86835759-86835882	chr5:86835759-86835882	1.54977	1.57576e-14	31.7815
B4A_chr8-71535473-71535681	chr8:71535473-71535681	4.01296	1.63338e-14	31.7455
PB1D11_chr14-55609453-55609535	chr14:55609453-55609535	2.86024	1.67487e-14	31.7205
(TGG)n_chr3-122276310-122276335	chr3:122276310-122276335	1.94126	1.72929e-14	31.6885
ID_B1_chr4-134926161-134926282	chr4:134926161-134926282	-2.10312	1.77328e-14	31.6634
RMER1B_chr3-145108179-145108677	chr3:145108179-145108677	3.75423	1.80979e-14	31.643
Lx_chr5-13368791-13369979	chr5:13368791-13369979	3.1315	1.93796e-14	31.5746
B3_chr3-122268289-122268485	chr3:122268289-122268485	2.08332	2.06563e-14	31.5108
RLTR10E_chr1-179528526-179528847	chr1:179528526-179528847	1.83126	2.11528e-14	31.487
L1MB2_chr1-37417618-37417948	chr1:37417618-37417948	1.51313	2.33325e-14	31.3889
GA-rich_chr5-86817044-86817197	chr5:86817044-86817197	2.04108	2.38797e-14	31.3657
CT-rich_chr8-82764322-82764378	chr8:82764322-82764378	1.73719	2.40892e-14	31.357
(TTTTG)n_chr5-104213091-104213128	chr5:104213091-104213128	-5.02607	2.47402e-14	31.3303
MamSINE1_chrX-145446580-145446717	chrX:145446580-145446717	-2.54635	2.48059e-14	31.3277
(CAG)n_chr10-111506966-111506999	chr10:111506966-111506999	2.64825	2.65815e-14	31.2586
L1_Mus1_chr16-98062162-98064203	chr16:98062162-98064203	2.45685	2.69127e-14	31.2462
AT_rich_chr10-120362769-120362791	chr10:120362769-120362791	1.7974	3.63192e-14	30.9464
B4_chr10-13563173-13563311	chr10:13563173-13563311	2.61023	3.78346e-14	30.9056
ID_B1_chr19-46313876-46314100	chr19:46313876-46314100	2.01119	3.832e-14	30.8928
MLT1B_chr17-75391486-75391820	chr17:75391486-75391820	-1.79047	3.88162e-14	30.8799
B3_chr18-60392148-60392363	chr18:60392148-60392363	3.52457	4.49706e-14	30.7328
ORR1C1_chr4-107883008-107883068	chr4:107883008-107883068	1.47269	4.69639e-14	30.6894
MIR_chr4-132282824-132282934	chr4:132282824-132282934	1.61475	4.77743e-14	30.6723
(TTTTTG)n_chr5-121154438-121154468	chr5:121154438-121154468	1.81406	4.80133e-14	30.6673
B1_Mur3_chr11-69392253-69392394	chr11:69392253-69392394	1.82254	5.02994e-14	30.6208
B3_chr9-35187099-35187313	chr9:35187099-35187313	2.13745	5.15017e-14	30.5972
(CAG)n_chr11-59735859-59735896	chr11:59735859-59735896	1.7259	5.92209e-14	30.4575
ID_B1_chr11-106821053-106821200	chr11:106821053-106821200	1.6687	6.27899e-14	30.399
polypurine_chr19-46083294-46083345	chr19:46083294-46083345	1.36954	6.99214e-14	30.2914
MMSAT4_chr4-147754582-147755866	chr4:147754582-147755866	2.05684	7.44378e-14	30.2288
B3_chr9-15306860-15307026	chr9:15306860-15307026	2.31355	7.48525e-14	30.2233
ORR1B1_chr7-143668060-143668389	chr7:143668060-143668389	2.05004	8.20523e-14	30.1314
MMSAT4_chr7-43589898-43590353	chr7:43589898-43590353	1.92319	8.20838e-14	30.131
L1Md_F2_chr7-87038371-87043505	chr7:87038371-87043505	4.57244	8.85674e-14	30.055
IAPEY4_I-int_chr6-3337207-3341286	chr6:3337207-3341286	2.0023	9.17754e-14	30.0194
B3_chr5-104437769-104437964	chr5:104437769-104437964	-3.51548	9.19212e-14	30.0178
(TG)n_chr11-102436752-102436779	chr11:102436752-102436779	-1.83002	1.13924e-13	29.8032
(CAT)n_chr13-98863730-98863788	chr13:98863730-98863788	1.48259	1.22298e-13	29.7323
L3_chr2-65133567-65133641	chr2:65133567-65133641	1.70931	1.33213e-13	29.6468
B1_Mus2_chr2-109899959-109900012	chr2:109899959-109900012	1.72816	1.57757e-13	29.4777
ORR1A2_chr5-120823891-120824206	chr5:120823891-120824206	5.01171	1.57757e-13	29.4777
L1VL4_chr19-4412804-4414914	chr19:4412804-4414914	2.30895	1.78718e-13	29.353
ID4__chr7-118489328-118489403	chr7:118489328-118489403	1.96868	1.90379e-13	29.2898
(TCC)n_chr10-78181129-78181168	chr10:78181129-78181168	2.10215	2.06109e-13	29.2104
L2c_chr11-70204601-70204876	chr11:70204601-70204876	2.78029	2.11404e-13	29.185
RLTR30D_RN_chr17-34997139-34997395	chr17:34997139-34997395	-2.15972	2.28973e-13	29.1052
MLT1D_chr7-118843313-118843516	chr7:118843313-118843516	1.78586	2.40403e-13	29.0565
A-rich_chr5-38230674-38230736	chr5:38230674-38230736	1.66129	2.48788e-13	29.0222
Lx_chr8-104969016-104969371	chr8:104969016-104969371	4.07428	2.61629e-13	28.9718
RLTR31D_MM_chr14-56697629-56697910	chr14:56697629-56697910	2.30343	2.63961e-13	28.963
RLTR22_Mus_chr17-82399331-82399471	chr17:82399331-82399471	4.36232	2.66787e-13	28.9523
L2_chr5-145144952-145144997	chr5:145144952-145144997	1.38132	2.7522e-13	28.9212
GA-rich_chr11-103043198-103043236	chr11:103043198-103043236	1.76001	2.75914e-13	28.9187
GA-rich_chr10-120363200-120363256	chr10:120363200-120363256	1.77636	3.07012e-13	28.8119
(CTCA)n_chr11-4269603-4269653	chr11:4269603-4269653	2.86563	3.10884e-13	28.7994
CT-rich_chr1-86356557-86356652	chr1:86356557-86356652	1.43801	3.24371e-13	28.7569
ID_B1_chr4-59771886-59772068	chr4:59771886-59772068	1.71523	3.34031e-13	28.7275
L3b_chr5-75011222-75011297	chr5:75011222-75011297	1.7656	3.61777e-13	28.6477
B4A_chr16-14390349-14390462	chr16:14390349-14390462	4.31521	3.94644e-13	28.5608
RMER1A_chr4-56807758-56808052	chr4:56807758-56808052	1.93622	3.99023e-13	28.5498
(CGAG)n_chr10-128565932-128565993	chr10:128565932-128565993	1.96544	4.14721e-13	28.5112
L1_Mus4_chr18-23220806-23221908	chr18:23220806-23221908	1.95619	4.22892e-13	28.4917
L1MB2_chr1-37418012-37418109	chr1:37418012-37418109	1.8101	4.37211e-13	28.4584
MTC_chr17-36003426-36003834	chr17:36003426-36003834	3.21541	4.37211e-13	28.4584
(CATATA)n_chr7-104411000-104411067	chr7:104411000-104411067	3.43426	4.57352e-13	28.4133
Tigger7_chr18-34344878-34345059	chr18:34344878-34345059	-1.77268	4.83911e-13	28.3569
B1_Mur1_chr12-112513700-112513829	chr12:112513700-112513829	3.6107	4.86782e-13	28.351
B1_Mus1_chr1-52160225-52160369	chr1:52160225-52160369	2.6469	4.94836e-13	28.3346
L3_chr15-98651898-98651954	chr15:98651898-98651954	1.75959	5.04349e-13	28.3155
AT_rich_chr16-44159934-44159955	chr16:44159934-44159955	1.62925	5.10039e-13	28.3043
MERV1_LTR_chr9-103325939-103326390	chr9:103325939-103326390	-3.31536	6.36315e-13	28.0831
(TTC)n_chr7-118853262-118853292	chr7:118853262-118853292	2.19416	7.20691e-13	27.9586
ORR1D2_chr4-56806633-56806978	chr4:56806633-56806978	2.01132	8.1811e-13	27.8318
Lx5_chr17-82402653-82403126	chr17:82402653-82403126	3.69016	9.4514e-13	27.6874
L2_chr8-107384731-107385162	chr8:107384731-107385162	2.23545	1.00045e-12	27.6306
MIRc_chr4-120524950-120525049	chr4:120524950-120525049	2.03927	1.02176e-12	27.6095
MER2_chr9-54772021-54772342	chr9:54772021-54772342	-5.0671	1.07624e-12	27.5575
CT-rich_chr10-88795431-88795489	chr10:88795431-88795489	1.80684	1.17862e-12	27.4667
MMSAT4_chr11-49215577-49216479	chr11:49215577-49216479	1.45357	1.19061e-12	27.4566
(TTTG)n_chr18-58010121-58010152	chr18:58010121-58010152	-4.69865	1.28538e-12	27.38
RLTR4_MM-int_chr10-5718455-5726012	chr10:5718455-5726012	4.56342	1.33157e-12	27.3447
(TG)n_chr9-32756485-32756513	chr9:32756485-32756513	1.70844	1.45433e-12	27.2565
PB1_chr18-46733633-46733742	chr18:46733633-46733742	1.94024	1.45433e-12	27.2565
Lx7_chr16-70530356-70531644	chr16:70530356-70531644	3.28724	1.57299e-12	27.178
T-rich_chr5-104213972-104214035	chr5:104213972-104214035	-6.43083	1.61736e-12	27.1502
RLTR41C_chr11-86209157-86209606	chr11:86209157-86209606	-1.34343	1.64293e-12	27.1345
B4A_chr4-89127183-89127467	chr4:89127183-89127467	2.36922	1.75839e-12	27.0666
(TG)n_chr9-49505291-49505349	chr9:49505291-49505349	-2.4562	1.76356e-12	27.0637
(TTC)n_chr7-118852439-118852478	chr7:118852439-118852478	1.81102	1.79385e-12	27.0467
MIR_chr15-62242164-62242250	chr15:62242164-62242250	1.70989	1.85442e-12	27.0134
PB1D9_chr11-105139865-105139976	chr11:105139865-105139976	1.81512	1.96663e-12	26.9547
MMSAT4_chr5-145244533-145244671	chr5:145244533-145244671	1.99262	1.97832e-12	26.9488
B1_Mus1_chr17-46774807-46774958	chr17:46774807-46774958	1.45304	1.99426e-12	26.9407
MIR_chr10-80104183-80104287	chr10:80104183-80104287	3.01109	2.0321e-12	26.9219
IAPEY4_I-int_chr7-48124449-48132115	chr7:48124449-48132115	4.9808	2.05029e-12	26.913
L1MB8_chr6-135310506-135311172	chr6:135310506-135311172	3.01626	2.0546e-12	26.9109
MIRb_chr16-35833456-35833653	chr16:35833456-35833653	2.63847	2.1135e-12	26.8827
B1_Mur2_chr2-130681276-130681425	chr2:130681276-130681425	1.30463	2.13547e-12	26.8723
(CCA)n_chr16-65839513-65839541	chr16:65839513-65839541	3.06644	2.43168e-12	26.7424
MMERVK10D3_I-int_chr9-12097846-12104076	chr9:12097846-12104076	4.55392	2.50732e-12	26.7118
(TTC)n_chr10-93880078-93880107	chr10:93880078-93880107	1.66321	2.57665e-12	26.6845
RLTR6C_Mm_chr11-86811741-86812240	chr11:86811741-86812240	2.42527	2.5936e-12	26.678
L2c_chr11-94644779-94644841	chr11:94644779-94644841	1.29103	2.80557e-12	26.5994
PB1D10_chr9-83599533-83599612	chr9:83599533-83599612	1.67767	2.94141e-12	26.5521
MuLV-int_chr4-134162050-134163888	chr4:134162050-134163888	-2.16219	2.94712e-12	26.5502
Lx2_chr1-40462410-40462614	chr1:40462410-40462614	4.10418	3.04938e-12	26.5161
B1_Mur4_chr13-54584969-54585120	chr13:54584969-54585120	1.62721	3.21294e-12	26.4638
B1_Mur2_chr17-12943430-12943570	chr17:12943430-12943570	-2.56878	3.30297e-12	26.4362
MIRb_chr19-27253278-27253393	chr19:27253278-27253393	-3.92702	3.45056e-12	26.3925
(CA)n_chr12-87428526-87428580	chr12:87428526-87428580	1.83272	3.57172e-12	26.358
RMER6D_chr10-72673939-72674338	chr10:72673939-72674338	1.66257	3.66637e-12	26.3318
(TTC)n_chr11-106252538-106252568	chr11:106252538-106252568	1.48649	3.97807e-12	26.2502
MTEb_chr13-49261485-49261848	chr13:49261485-49261848	5.17269	4.05508e-12	26.2311
RLTR1B-int_chr9-57477641-57480829	chr9:57477641-57480829	3.45713	4.05675e-12	26.2306
(CCCCG)n_chr10-120364096-120364145	chr10:120364096-120364145	1.69269	4.28801e-12	26.1752
B1_Mus1_chr1-185357112-185357263	chr1:185357112-185357263	2.28423	4.5563e-12	26.1145
ID_B1_chr3-110247174-110247316	chr3:110247174-110247316	2.40732	4.5563e-12	26.1145
MMSAT4_chr5-145244113-145244236	chr5:145244113-145244236	2.01028	4.84633e-12	26.0528
MLTR14_chr1-34448281-34448735	chr1:34448281-34448735	1.95835	4.95195e-12	26.0312
MMVL30-int_chr18-89836082-89837556	chr18:89836082-89837556	3.63382	4.95225e-12	26.0312
RLTR51A_Mm_chr7-19344731-19344882	chr7:19344731-19344882	2.09341	4.95225e-12	26.0312
(A)n_chr10-111508428-111508464	chr10:111508428-111508464	1.80231	5.09267e-12	26.0032
L2_chr1-156620699-156620907	chr1:156620699-156620907	2.13092	5.42142e-12	25.9407
PB1D7_chr11-102685807-102685918	chr11:102685807-102685918	1.72226	5.74168e-12	25.8833
MMVL30-int_chr18-89837839-89840036	chr18:89837839-89840036	5.1039	6.00109e-12	25.8391
L2c_chr17-23822842-23823594	chr17:23822842-23823594	-2.82772	6.05105e-12	25.8308
(CCG)n_chr19-3852238-3852295	chr19:3852238-3852295	3.92517	6.06262e-12	25.8289
B1_Mur1_chr14-54690328-54690436	chr14:54690328-54690436	1.45744	6.6427e-12	25.7375
MIRc_chr2-164152902-164153056	chr2:164152902-164153056	1.74531	7.13322e-12	25.6663
(TC)n_chr5-104435431-104435574	chr5:104435431-104435574	-4.23426	7.33609e-12	25.6382
(TTTA)n_chr5-90905320-90905362	chr5:90905320-90905362	9.81333	7.45173e-12	25.6226
GA-rich_chr3-145576636-145576816	chr3:145576636-145576816	1.61302	7.83942e-12	25.5719
CT-rich_chr10-86691627-86691745	chr10:86691627-86691745	1.65612	7.99484e-12	25.5522
ID_B1_chr6-136873683-136873818	chr6:136873683-136873818	-5.26093	8.04118e-12	25.5464
RSINE1_chr19-8891611-8891767	chr19:8891611-8891767	1.99553	8.15881e-12	25.5319
MER44C_chr5-21480630-21481181	chr5:21480630-21481181	1.97477	8.33492e-12	25.5106
RMER21A_chr2-119379999-119380126	chr2:119379999-119380126	1.72501	8.35759e-12	25.5079
B2_Mm1t_chr6-124841173-124841363	chr6:124841173-124841363	-2.2205	8.39113e-12	25.5038
MER2_chr2-118794927-118795175	chr2:118794927-118795175	-4.57755	8.39113e-12	25.5038
(CTG)n_chr2-14146280-14146313	chr2:14146280-14146313	1.78443	8.71453e-12	25.466
A-rich_chr16-45962809-45962859	chr16:45962809-45962859	5.0869	9.03072e-12	25.4304
MT2A_chr4-124943798-124944111	chr4:124943798-124944111	1.84149	9.49048e-12	25.3807
MTEa_chr17-78854282-78854400	chr17:78854282-78854400	2.57224	9.49048e-12	25.3807
ID_B1_chr8-79684048-79684228	chr8:79684048-79684228	1.16317	1.08063e-11	25.2509
MamRep38_chr10-128291496-128291648	chr10:128291496-128291648	2.36246	1.09115e-11	25.2412
(CGG)n_chr5-145139987-145140013	chr5:145139987-145140013	2.06697	1.12067e-11	25.2145
RLTR4_MM-int_chr8-90889348-90891184	chr8:90889348-90891184	1.97052	1.13899e-11	25.1983
RMER1B_chr5-49787957-49789090	chr5:49787957-49789090	4.97431	1.16918e-11	25.1721
MT2A_chr4-49513475-49513944	chr4:49513475-49513944	1.40618	1.18524e-11	25.1585
(TTTTG)n_chr12-26444442-26444508	chr12:26444442-26444508	4.71415	1.22933e-11	25.122
(CTG)n_chr2-181548698-181548746	chr2:181548698-181548746	1.72384	1.29744e-11	25.068
ORR1D1_chr6-43382337-43382666	chr6:43382337-43382666	2.54697	1.35721e-11	25.023
RLTR10-int_chr7-78899431-78901371	chr7:78899431-78901371	1.88378	1.37545e-11	25.0097
MTD_chr9-123067779-123068124	chr9:123067779-123068124	1.48484	1.37735e-11	25.0083
(CGCGG)n_chr1-58393214-58393318	chr1:58393214-58393318	1.45538	1.38117e-11	25.0055
ID4_chr7-104410068-104410150	chr7:104410068-104410150	3.2195	1.38117e-11	25.0055
ORR1D1_chr17-36002233-36002653	chr17:36002233-36002653	2.85678	1.45826e-11	24.9512
B3_chr19-8891898-8892114	chr19:8891898-8892114	2.26339	1.5478e-11	24.8916
MMSAT4_chr5-145244869-145244914	chr5:145244869-145244914	1.95753	1.62606e-11	24.8423
CT-rich_chr7-28331425-28331490	chr7:28331425-28331490	1.81097	1.70357e-11	24.7957
GA-rich_chr3-51461153-51461232	chr3:51461153-51461232	1.43767	1.71982e-11	24.7862
B4A_chr8-11620622-11620836	chr8:11620622-11620836	-2.91583	1.79623e-11	24.7427
MLT1A1_chr8-104968872-104968955	chr8:104968872-104968955	4.51931	2.07931e-11	24.5964
MIRb_chr15-79787300-79787404	chr15:79787300-79787404	-2.47166	2.08875e-11	24.5919
MER57E2_chr3-34046876-34046975	chr3:34046876-34046975	1.6144	2.12133e-11	24.5764
(CAT)n_chr12-54900074-54900106	chr12:54900074-54900106	1.79699	2.28504e-11	24.5021
PB1D10_chr1-170195463-170195575	chr1:170195463-170195575	1.7382	2.28504e-11	24.5021
RLTR6_Mm_chr2-75642371-75642945	chr2:75642371-75642945	1.48168	2.51103e-11	24.4077
C-rich_chr2-113525526-113525597	chr2:113525526-113525597	2.69422	2.5288e-11	24.4007
(CA)n_chr10-21997194-21997231	chr10:21997194-21997231	-3.39511	2.61539e-11	24.367
MIRc_chr11-4268797-4268931	chr11:4268797-4268931	2.87719	2.70886e-11	24.3319
B1_Mur4_chr17-80203358-80203481	chr17:80203358-80203481	-3.0644	2.71154e-11	24.3309
ID_B1_chr5-138193271-138193450	chr5:138193271-138193450	-1.2542	2.71154e-11	24.3309
T-rich_chr12-54934739-54934856	chr12:54934739-54934856	1.84894	2.89542e-11	24.2653
GA-rich_chr10-85879365-85879401	chr10:85879365-85879401	1.77167	2.91168e-11	24.2597
MIR_chr8-75096211-75096346	chr8:75096211-75096346	4.53445	2.91327e-11	24.2592
MLT1F_chr12-111545022-111545127	chr12:111545022-111545127	1.53192	3.08862e-11	24.2007
MER20_chr6-134923814-134924042	chr6:134923814-134924042	-2.52945	3.16952e-11	24.1749
CT-rich_chr10-34002423-34002483	chr10:34002423-34002483	1.46529	3.23247e-11	24.1552
(CA)n_chr1-93300354-93300391	chr1:93300354-93300391	-4.35515	3.39862e-11	24.1051
B1_Mus2_chr1-71591238-71591381	chr1:71591238-71591381	-4.53332	3.4312e-11	24.0955
B3_chr2-62597056-62597264	chr2:62597056-62597264	3.71678	3.56667e-11	24.0568
(TTTTG)n_chr9-108747733-108747756	chr9:108747733-108747756	2.3633	3.67416e-11	24.0271
B1F_chr5-123530743-123530851	chr5:123530743-123530851	1.80198	4.06775e-11	23.9253
IAPEY4_I-int_chr14-43804700-43812362	chr14:43804700-43812362	3.2608	4.07026e-11	23.9247
AT_rich_chr1-30942628-30942654	chr1:30942628-30942654	1.95196	4.19097e-11	23.8955
ID4_chr9-108748179-108748253	chr9:108748179-108748253	1.8679	4.19097e-11	23.8955
RLTR31D_MM_chr1-34444870-34445187	chr1:34444870-34445187	1.58988	4.20755e-11	23.8916
CT-rich_chr7-64389516-64389576	chr7:64389516-64389576	1.77795	4.78433e-11	23.7631
Lx9_chr2-13581154-13581237	chr2:13581154-13581237	-3.0268	4.90717e-11	23.7377
B3_chr8-18932743-18932959	chr8:18932743-18932959	-2.99319	5.17899e-11	23.6838
GC_rich_chr2-62645961-62645984	chr2:62645961-62645984	5.18697	6.03291e-11	23.5312
RMER19B_chr1-85214685-85215577	chr1:85214685-85215577	3.48128	6.22338e-11	23.5001
A-rich_chr2-160682667-160682752	chr2:160682667-160682752	1.74419	7.73236e-11	23.283
L2a_chr1-153123109-153123238	chr1:153123109-153123238	2.50911	7.7792e-11	23.277
MARNA_chr14-65398524-65398692	chr14:65398524-65398692	-3.30178	9.02721e-11	23.1282
ID_B1_chr19-53032630-53032834	chr19:53032630-53032834	2.93582	9.05349e-11	23.1253
(GGA)n_chr6-100866037-100866081	chr6:100866037-100866081	1.58511	9.30345e-11	23.0981
RLTR49_chr16-32630820-32630887	chr16:32630820-32630887	1.49972	9.30345e-11	23.0981
MamGypLTR1b_chr5-120141495-120141628	chr5:120141495-120141628	1.85746	9.32565e-11	23.0957
MTE2b_chr5-105079481-105079829	chr5:105079481-105079829	2.18204	9.45806e-11	23.0816
MT2C_Mm_chr13-68231634-68232102	chr13:68231634-68232102	5.33098	9.58609e-11	23.0681
ORR1A1-int_chr17-36004833-36005218	chr17:36004833-36005218	2.53999	1.04559e-10	22.9813
B1F_chr1-180866482-180866571	chr1:180866482-180866571	1.74154	1.06217e-10	22.9655
(CA)n_chr1-34815535-34815586	chr1:34815535-34815586	1.58171	1.10106e-10	22.9296
RMER6C_chr10-72674361-72674749	chr10:72674361-72674749	1.44192	1.11134e-10	22.9203
CT-rich_chr15-77153688-77153771	chr15:77153688-77153771	2.32978	1.16071e-10	22.8768
MLT1A1_chr6-121270864-121270954	chr6:121270864-121270954	4.74901	1.16245e-10	22.8753
Lx3B_chr17-12821652-12822590	chr17:12821652-12822590	-2.7814	1.17513e-10	22.8645
MTD_chr2-24959844-24960195	chr2:24959844-24960195	1.84115	1.2413e-10	22.8097
B4A_chr11-6257906-6258164	chr11:6257906-6258164	2.43014	1.34823e-10	22.7271
B3A_chr2-113711588-113711766	chr2:113711588-113711766	2.52787	1.37153e-10	22.7099
PB1D9_chr4-21757725-21757823	chr4:21757725-21757823	2.02241	1.37153e-10	22.7099
MTD_chr9-103326676-103327032	chr9:103326676-103327032	-3.25164	1.38263e-10	22.7019
MMSAT4_chr15-75947772-75947919	chr15:75947772-75947919	1.93539	1.38359e-10	22.7012
IMPB_01_chr11-105350479-105350536	chr11:105350479-105350536	-1.89156	1.39597e-10	22.6923
RMER17C_chr16-23613770-23613993	chr16:23613770-23613993	3.9517	1.44325e-10	22.659
(TTTTG)n_chr9-83598948-83598978	chr9:83598948-83598978	1.87131	1.47061e-10	22.6402
MIR_chr9-35191600-35191812	chr9:35191600-35191812	2.28095	1.47578e-10	22.6367
B1_Mur1_chr11-60786466-60786597	chr11:60786466-60786597	1.79331	1.47901e-10	22.6345
MIRb_chr11-69392951-69393081	chr11:69392951-69393081	1.99251	1.47901e-10	22.6345
GA-rich_chr11-3977632-3977712	chr11:3977632-3977712	1.28123	1.48994e-10	22.6271
C-rich_chr15-36608227-36608324	chr15:36608227-36608324	1.6546	1.49103e-10	22.6264
(CAG)n_chr4-57855491-57855606	chr4:57855491-57855606	1.7241	1.61935e-10	22.5438
(TGG)n_chr15-98543816-98543842	chr15:98543816-98543842	1.74107	1.69757e-10	22.4967
(GGA)n_chr16-16911035-16911065	chr16:16911035-16911065	1.96784	1.70745e-10	22.4909
(TG)n_chr14-70548805-70548837	chr14:70548805-70548837	-1.94134	1.74225e-10	22.4707
(CCCTAA)n_chr16-45961389-45961447	chr16:45961389-45961447	4.87718	1.75098e-10	22.4657
B1_Mus1_chr15-83226868-83227002	chr15:83226868-83227002	-3.72045	1.85128e-10	22.41
B1_Mm_chr15-78928907-78929053	chr15:78928907-78929053	-3.4296	1.87202e-10	22.3988
(CCCCAG)n_chr19-5646894-5647021	chr19:5646894-5647021	1.60965	1.87379e-10	22.3979
(GGA)n_chr11-5871735-5871780	chr11:5871735-5871780	-1.47879	1.92514e-10	22.3709
RMER15_chr7-3475079-3475222	chr7:3475079-3475222	4.92852	2.07574e-10	22.2955
AT_rich_chr10-120363259-120363285	chr10:120363259-120363285	1.94612	2.11181e-10	22.2783
(GCCTG)n_chr1-90776082-90776182	chr1:90776082-90776182	-1.70577	2.41348e-10	22.1448
B2_Mm1a_chr3-122268089-122268266	chr3:122268089-122268266	2.03033	2.45339e-10	22.1284
B1F_chr4-132357580-132357710	chr4:132357580-132357710	1.62438	2.53735e-10	22.0947
B4_chr19-29386487-29386717	chr19:29386487-29386717	3.41161	2.57129e-10	22.0814
RMER17A2_chr16-14476127-14476467	chr16:14476127-14476467	2.74054	2.70569e-10	22.0305
IMPB_01_chrY-90737905-90738857	chrY:90737905-90738857	-2.65556	2.77339e-10	22.0058
B1_Mur1_chr1-51470288-51470442	chr1:51470288-51470442	1.98446	2.79752e-10	21.9971
RMER1C_chr17-36001541-36001829	chr17:36001541-36001829	3.77172	2.87748e-10	21.9689
B2_Mm1t_chr9-35185813-35185994	chr9:35185813-35185994	2.57419	2.95188e-10	21.9434
B3_chr10-127046351-127046573	chr10:127046351-127046573	2.40512	3.08479e-10	21.8994
MurSatRep1_chr7-29997746-29997881	chr7:29997746-29997881	2.5115	3.16133e-10	21.8749
(TTC)n_chr15-80261049-80261082	chr15:80261049-80261082	1.40772	3.16705e-10	21.8731
PB1D10_chr2-13579774-13579873	chr2:13579774-13579873	-2.92649	3.30296e-10	21.831
(CAT)n_chr10-119215206-119215267	chr10:119215206-119215267	1.28368	3.30524e-10	21.8303
(CAAAA)n_chr19-60528700-60528733	chr19:60528700-60528733	2.27804	3.30742e-10	21.8297
PB1_chr12-26479139-26479232	chr12:26479139-26479232	4.58831	3.30742e-10	21.8297
(TCC)n_chr11-53332427-53332496	chr11:53332427-53332496	1.90823	3.31334e-10	21.8279
PB1D10_chr2-181551136-181551251	chr2:181551136-181551251	1.47375	3.48487e-10	21.7774
(CTG)n_chr5-76227013-76227070	chr5:76227013-76227070	1.81768	3.78701e-10	21.6943
(TTTTC)n_chr11-77046160-77046183	chr11:77046160-77046183	1.82987	3.78701e-10	21.6943
MER58A_chr1-93298486-93298647	chr1:93298486-93298647	-4.52105	3.87049e-10	21.6725
Lx3_Mus_chr11-72773286-72774964	chr11:72773286-72774964	2.25678	3.94975e-10	21.6522
L2a_chr7-25364865-25365033	chr7:25364865-25365033	-1.86182	4.01206e-10	21.6365
AT_rich_chr17-56187065-56187086	chr17:56187065-56187086	1.99159	4.07635e-10	21.6206
RMER12_chr1-172198981-172199125	chr1:172198981-172199125	1.78181	4.11468e-10	21.6113
L3_chr13-16017151-16017229	chr13:16017151-16017229	2.39511	4.20089e-10	21.5906
RSINE1_chr6-135313773-135313863	chr6:135313773-135313863	4.34822	4.24938e-10	21.5791
MTE-int_chr8-66475585-66475734	chr8:66475585-66475734	2.72875	4.27385e-10	21.5733
RMER17A2_chr16-14476565-14476937	chr16:14476565-14476937	2.37532	4.27385e-10	21.5733
(GAA)n_chr2-167020512-167020537	chr2:167020512-167020537	1.52106	4.34835e-10	21.5561
MMVL30-int_chr17-21475316-21477755	chr17:21475316-21477755	1.17485	4.40001e-10	21.5442
B1_Mus1_chr1-183409747-183409889	chr1:183409747-183409889	1.89534	4.6447e-10	21.4901
B4_chr6-145963211-145963484	chr6:145963211-145963484	-2.76655	4.69429e-10	21.4795
CT-rich_chr10-86698334-86698414	chr10:86698334-86698414	2.23772	4.82112e-10	21.4528
LTR33_chr18-35734114-35734221	chr18:35734114-35734221	-1.89031	5.09553e-10	21.3975
MT2B_chr19-7028613-7028634	chr19:7028613-7028634	1.51129	5.24915e-10	21.3678
RLTR31D_MM_chr19-6054268-6054591	chr19:6054268-6054591	1.1776	5.39647e-10	21.3401
ORR1D1_chr2-26888710-26889047	chr2:26888710-26889047	2.67471	5.45909e-10	21.3286
L1MEg_chr11-116851196-116851257	chr11:116851196-116851257	-2.60334	5.61481e-10	21.3004
(CA)n_chr4-41292576-41292632	chr4:41292576-41292632	1.57439	5.71895e-10	21.2821
AT_rich_chr11-82047252-82047275	chr11:82047252-82047275	6.33388	6.00331e-10	21.2335
RLTR20A4_chr11-101322929-101323026	chr11:101322929-101323026	1.44099	6.2243e-10	21.1974
B1_Mus1_chr17-80203946-80204066	chr17:80203946-80204066	-2.53542	6.49017e-10	21.1556
(CAGGC)n_chr9-108649254-108649297	chr9:108649254-108649297	2.89992	6.52756e-10	21.1498
ID_B1_chr11-53416592-53416763	chr11:53416592-53416763	1.49495	6.61688e-10	21.1362
B1_Mur1_chr3-40792220-40792359	chr3:40792220-40792359	2.07338	6.75204e-10	21.116
ID4_chr4-11172478-11172554	chr4:11172478-11172554	1.58001	6.79244e-10	21.11
B3_chr14-31479271-31479468	chr14:31479271-31479468	1.88144	7.28092e-10	21.0406
ORR1D2-int_chr4-56808631-56809108	chr4:56808631-56809108	1.59778	7.35271e-10	21.0308
RLTR17B_Mm_chr19-44571413-44571530	chr19:44571413-44571530	1.83919	7.5348e-10	21.0063
Lx2B_chr12-35691538-35692561	chr12:35691538-35692561	9.22281	7.69595e-10	20.9852
MER44A_chr6-86386611-86386820	chr6:86386611-86386820	-1.64669	7.89835e-10	20.9592
PB1_chr19-41923720-41923836	chr19:41923720-41923836	1.61861	7.89854e-10	20.9592
(CCCCAG)n_chr17-24420199-24420274	chr17:24420199-24420274	1.73035	8.25296e-10	20.9153
(CAA)n_chr2-174465555-174465578	chr2:174465555-174465578	1.33168	8.77071e-10	20.8544
MLT1L_chr5-100679702-100680047	chr5:100679702-100680047	-3.89135	8.77071e-10	20.8544
L3b_chr15-79787732-79787772	chr15:79787732-79787772	-2.43443	8.88159e-10	20.8419
MLT1A1_chr1-37878981-37879075	chr1:37878981-37879075	1.74536	9.2714e-10	20.7989
L1Md_F2_chr19-20373830-20374286	chr19:20373830-20374286	-4.43331	9.28529e-10	20.7974
ERVB5_2-LTR_MM_chr17-82401867-82402322	chr17:82401867-82402322	3.9858	9.35664e-10	20.7898
L1MD1_chr1-36526916-36527373	chr1:36526916-36527373	-2.18372	9.71172e-10	20.7525
(CAGAGA)n_chr11-101738164-101738289	chr11:101738164-101738289	1.74392	9.77762e-10	20.7458
(TC)n_chr2-126089626-126089668	chr2:126089626-126089668	1.81539	9.82391e-10	20.741
AT_rich_chr19-36949041-36949083	chr19:36949041-36949083	2.34104	9.82391e-10	20.741
MLT1B_chr7-19245959-19246274	chr7:19245959-19246274	1.40559	9.82391e-10	20.741
MMSAT4_chr7-43590463-43591036	chr7:43590463-43591036	1.75793	9.82391e-10	20.741
PB1D7_chr19-8891451-8891565	chr19:8891451-8891565	2.21944	1.00438e-09	20.7189
RSINE1_chr10-58421889-58422039	chr10:58421889-58422039	1.58195	1.05082e-09	20.6737
Lx5_chr19-38788706-38789076	chr19:38788706-38789076	1.5515	1.08356e-09	20.643
(TCC)n_chr6-124841780-124841811	chr6:124841780-124841811	-2.23785	1.08453e-09	20.6421
RMER16C_chr10-83368078-83368454	chr10:83368078-83368454	1.52734	1.21339e-09	20.5299
RMER1A_chr11-6256605-6257306	chr11:6256605-6257306	2.09184	1.21339e-09	20.5299
(ATG)n_chr7-101898903-101898973	chr7:101898903-101898973	1.53604	1.21994e-09	20.5245
MIRc_chr6-128434601-128434762	chr6:128434601-128434762	1.35554	1.22762e-09	20.5182
PB1D11_chr16-35833699-35833793	chr16:35833699-35833793	2.63822	1.28732e-09	20.4707
(GGAA)n_chr2-11473592-11473691	chr2:11473592-11473691	3.27699	1.28921e-09	20.4692
B3A_chr10-127046959-127047114	chr10:127046959-127047114	2.44064	1.29767e-09	20.4627
LTRIS_Mus_chr15-73108412-73108645	chr15:73108412-73108645	1.67099	1.47489e-09	20.3347
polypurine_chr2-3304836-3304875	chr2:3304836-3304875	1.34525	1.47634e-09	20.3337
(CAG)n_chr19-46083155-46083182	chr19:46083155-46083182	1.42002	1.50923e-09	20.3117
ID_B1_chr15-7836031-7836239	chr15:7836031-7836239	6.68438	1.514e-09	20.3085
MamRep137_chr1-176908990-176909222	chr1:176908990-176909222	9.16015	1.59755e-09	20.2548
PB1D10_chr19-37421336-37421442	chr19:37421336-37421442	-2.10572	1.61554e-09	20.2436
B3_chr9-54771394-54771596	chr9:54771394-54771596	-4.3753	1.61856e-09	20.2417
L1Md_F3_chr3-70790223-70791039	chr3:70790223-70791039	1.34576	1.63436e-09	20.232
CT-rich_chr5-124407133-124407171	chr5:124407133-124407171	1.73874	1.81754e-09	20.1258
Tigger16b_chr4-33051056-33051205	chr4:33051056-33051205	1.58788	1.81949e-09	20.1247
(CA)n_chr4-123736497-123736527	chr4:123736497-123736527	1.84098	1.89061e-09	20.0864
B4A_chr16-14480771-14481017	chr16:14480771-14481017	2.46594	1.90592e-09	20.0783
PB1D9_chr18-46733118-46733235	chr18:46733118-46733235	1.78737	1.95764e-09	20.0515
(CTG)n_chr15-12136471-12136572	chr15:12136471-12136572	1.6439	1.98807e-09	20.0361
(CAG)n_chr8-105301362-105301406	chr8:105301362-105301406	1.47534	2.03023e-09	20.0151
L2_chr19-44572011-44572071	chr19:44572011-44572071	1.88893	2.04608e-09	20.0073
(TTTG)n_chr3-145648020-145648040	chr3:145648020-145648040	-4.72799	2.13877e-09	19.963
B4A_chr10-7822022-7822205	chr10:7822022-7822205	1.46942	2.16645e-09	19.9502
MER21C_chr10-40248386-40248610	chr10:40248386-40248610	1.58475	2.16645e-09	19.9502
(GTGTG)n_chrX-77763832-77763871	chrX:77763832-77763871	2.21908	2.17857e-09	19.9446
IAPEz-int_chr11-106028616-106031883	chr11:106028616-106031883	-1.79786	2.33171e-09	19.8767
MIR3_chr18-61084145-61084267	chr18:61084145-61084267	-1.51677	2.35866e-09	19.8652
RLTR17_chr1-34447524-34447707	chr1:34447524-34447707	2.04491	2.39318e-09	19.8506
(TA)n_chr10-24598209-24598237	chr10:24598209-24598237	2.52174	2.39764e-09	19.8488
B1_Mur4_chr11-97328589-97328744	chr11:97328589-97328744	1.19287	2.39764e-09	19.8488
(CGG)n_chr10-17724424-17724539	chr10:17724424-17724539	2.29444	2.41551e-09	19.8414
MMSAT4_chr7-30023119-30023492	chr7:30023119-30023492	2.09809	2.42113e-09	19.839
B1_Mur3_chr10-120231392-120231543	chr10:120231392-120231543	1.50949	2.43773e-09	19.8322
B1_Mur1_chr1-88272045-88272169	chr1:88272045-88272169	-3.30403	2.43997e-09	19.8313
MIR3_chr1-74587546-74587633	chr1:74587546-74587633	2.57704	2.44769e-09	19.8281
(A)n_chr11-80471909-80471934	chr11:80471909-80471934	1.54695	2.4574e-09	19.8242
L1ME4b_chr6-50299736-50300124	chr6:50299736-50300124	-3.76148	2.46807e-09	19.8198
L3_chr13-13506359-13506452	chr13:13506359-13506452	1.72066	2.66288e-09	19.7439
(CCCCAG)n_chr15-79125475-79125564	chr15:79125475-79125564	2.19055	2.76635e-09	19.7057
L2b_chr10-123171145-123171184	chr10:123171145-123171184	1.46399	2.79929e-09	19.6939
B1_Mus2_chr6-85928884-85929031	chr6:85928884-85929031	1.75539	2.84281e-09	19.6785
RLTR12C_chr5-36471815-36472190	chr5:36471815-36472190	2.04892	2.941e-09	19.6445
ID_B1_chr1-60077840-60078070	chr1:60077840-60078070	1.76679	3.0686e-09	19.602
MamGyp-int_chr12-102742270-102743291	chr12:102742270-102743291	1.23078	3.15735e-09	19.5735
MMSAT4_chr15-75948444-75948569	chr15:75948444-75948569	1.83971	3.20895e-09	19.5573
B2_Mm1t_chr14-55609554-55609720	chr14:55609554-55609720	2.46106	3.22344e-09	19.5528
B1_Mus1_chrX-74272328-74272454	chrX:74272328-74272454	-2.78069	3.25654e-09	19.5426
(T)n_chr10-128076219-128076259	chr10:128076219-128076259	1.73741	3.36276e-09	19.5105
ORR1A2_chr12-112613253-112613567	chr12:112613253-112613567	-1.73661	3.42497e-09	19.4922
ORR1C1_chr8-15848843-15849169	chr8:15848843-15849169	8.96746	3.44961e-09	19.485
(TG)n_chr4-44525868-44526273	chr4:44525868-44526273	7.36769	3.45252e-09	19.4842
B3_chr8-111311357-111311528	chr8:111311357-111311528	2.13739	3.45252e-09	19.4842
MER58A_chr6-85929390-85929605	chr6:85929390-85929605	1.34397	3.48479e-09	19.4749
ID4__chrX-7668189-7668259	chrX:7668189-7668259	-1.24773	3.9025e-09	19.3616
PB1D9_chr4-43383643-43383736	chr4:43383643-43383736	2.46262	4.04407e-09	19.326
MIRb_chr14-70438901-70439109	chr14:70438901-70439109	1.54895	4.26658e-09	19.2725
IAPEY4_I-int_chr6-3333740-3337110	chr6:3333740-3337110	1.73998	4.48128e-09	19.2234
B3A_chr10-13564119-13564315	chr10:13564119-13564315	2.43376	4.53614e-09	19.2112
RLTR31D_MM_chr11-4270658-4270888	chr11:4270658-4270888	1.93275	4.53614e-09	19.2112
Lx7_chr8-22548199-22548627	chr8:22548199-22548627	2.69327	4.58211e-09	19.2011
L1_Mm_chr7-104503424-104504454	chr7:104503424-104504454	2.83287	4.58718e-09	19.2
PB1D9_chr7-46797392-46797498	chr7:46797392-46797498	2.91914	5.18694e-09	19.0771
C-rich_chr9-44407016-44407129	chr9:44407016-44407129	1.51461	5.23745e-09	19.0674
PB1D7_chr8-106200756-106200876	chr8:106200756-106200876	1.44379	5.46436e-09	19.025
B1_Mus1_chr10-77487373-77487477	chr10:77487373-77487477	1.6019	5.63484e-09	18.9943
CT-rich_chr16-35857216-35857281	chr16:35857216-35857281	2.98972	5.63484e-09	18.9943
MurSatRep1_chr8-71932937-71933527	chr8:71932937-71933527	1.6777	5.70926e-09	18.9812
PB1_chr8-109340061-109340177	chr8:109340061-109340177	2.43599	5.70926e-09	18.9812
(CAGAGA)n_chr5-74591856-74591927	chr5:74591856-74591927	1.51279	5.75975e-09	18.9724
CT-rich_chr3-158012333-158012443	chr3:158012333-158012443	1.19009	6.1191e-09	18.9119
B1F1_chr13-46713494-46713631	chr13:46713494-46713631	1.54053	6.27855e-09	18.8861
B1_Mur1_chr3-95286825-95286947	chr3:95286825-95286947	2.29236	6.3096e-09	18.8812
(CATA)n_chr13-75771369-75771464	chr13:75771369-75771464	1.44737	6.32227e-09	18.8792
AT_rich_chr9-111141217-111141238	chr9:111141217-111141238	1.93149	6.32227e-09	18.8792
G-rich_chr4-41314735-41314795	chr4:41314735-41314795	2.02861	6.39901e-09	18.8671
L1_Mus1_chr16-98059686-98062165	chr16:98059686-98062165	2.0253	7.04875e-09	18.7704
AT_rich_chr5-108706724-108706764	chr5:108706724-108706764	-2.70656	7.12559e-09	18.7596
(TG)n_chr14-47319895-47319960	chr14:47319895-47319960	1.67777	7.21948e-09	18.7465
B1_Mur2_chr11-6270794-6270899	chr11:6270794-6270899	-1.55153	7.22958e-09	18.7451
MurSatRep1_chr8-69706501-69707877	chr8:69706501-69707877	1.21521	7.34004e-09	18.7299
B1_Mus1_chr11-116803460-116803606	chr11:116803460-116803606	-2.14123	7.44086e-09	18.7163
MMVL30-int_chr13-68091810-68094803	chr13:68091810-68094803	3.06233	7.48559e-09	18.7103
Lx_chr14-45585864-45586594	chr14:45585864-45586594	-3.84834	7.61303e-09	18.6934
Lx9_chr2-13580981-13581110	chr2:13580981-13581110	-2.82514	7.77781e-09	18.672
B2_Mm2_chr1-71604391-71604583	chr1:71604391-71604583	-2.28657	8.04095e-09	18.6387
(TCC)n_chr19-41871444-41871477	chr19:41871444-41871477	1.60032	8.11137e-09	18.63
PB1_chr2-119105064-119105160	chr2:119105064-119105160	-2.38258	8.13303e-09	18.6273
PB1D10_chr2-31678348-31678455	chr2:31678348-31678455	1.50169	8.78297e-09	18.5505
B1_Mur2_chr3-122268821-122268963	chr3:122268821-122268963	1.66225	8.91553e-09	18.5355
ID_B1_chr11-60786648-60786840	chr11:60786648-60786840	1.49097	9.3972e-09	18.4829
RLTR6-int_chr13-68296652-68297443	chr13:68296652-68297443	8.73992	9.41786e-09	18.4807
PB1D11_chr6-86387138-86387241	chr6:86387138-86387241	-1.50371	9.49503e-09	18.4725
Lx2_chr4-13511499-13512574	chr4:13511499-13512574	3.57265	1.04018e-08	18.3813
MTE2b_chr5-105117695-105118058	chr5:105117695-105118058	3.54515	1.05565e-08	18.3665
B1_Mur3_chr3-40791678-40791811	chr3:40791678-40791811	2.13989	1.05586e-08	18.3663
(CAG)n_chr9-108534534-108534606	chr9:108534534-108534606	1.26068	1.06567e-08	18.3571
MER20B_chr9-90017623-90017749	chr9:90017623-90017749	-3.52162	1.07347e-08	18.3498
(CAAAA)n_chr18-46733501-46733539	chr18:46733501-46733539	2.27679	1.0862e-08	18.338
Lx5_chr12-74828466-74830215	chr12:74828466-74830215	1.376	1.0862e-08	18.338
RLTR17_chr9-22239630-22240297	chr9:22239630-22240297	1.64449	1.0862e-08	18.338
MMSAT4_chr17-22199570-22201430	chr17:22199570-22201430	1.4782	1.10853e-08	18.3176
L1M2_chr3-151731689-151731797	chr3:151731689-151731797	5.21483	1.16679e-08	18.2664
(CAGAGA)n_chr11-5871669-5871720	chr11:5871669-5871720	-1.48545	1.19464e-08	18.2428
MLT1D_chr12-38868739-38868965	chr12:38868739-38868965	-2.74777	1.21221e-08	18.2282
GC_rich_chr16-84735161-84735187	chr16:84735161-84735187	2.31464	1.24641e-08	18.2004
(TC)n_chr2-160605469-160605648	chr2:160605469-160605648	5.25074	1.25774e-08	18.1914
MLT1D_chr2-152107841-152108112	chr2:152107841-152108112	2.83382	1.25774e-08	18.1914
MLT1J_chr17-47623610-47623709	chr17:47623610-47623709	1.34628	1.27812e-08	18.1753
Mam_R4_chrX-134696506-134696626	chrX:134696506-134696626	-2.7696	1.284e-08	18.1707
(TG)n_chr3-151731640-151731689	chr3:151731640-151731689	5.88162	1.32488e-08	18.1394
G-rich_chr17-30005304-30005433	chr17:30005304-30005433	1.89586	1.35986e-08	18.1133
PB1D10_chr1-119471214-119471332	chr1:119471214-119471332	1.47678	1.36396e-08	18.1103
RMER12B_chr4-107895190-107896185	chr4:107895190-107896185	-2.19166	1.39468e-08	18.088
MIRb_chr7-28817512-28817764	chr7:28817512-28817764	-2.74849	1.40974e-08	18.0773
MamTip2_chrX-68711365-68711477	chrX:68711365-68711477	-3.80179	1.42386e-08	18.0673
(CTG)n_chr1-162709061-162709099	chr1:162709061-162709099	1.47636	1.52322e-08	17.9999
(CAAAAA)n_chr13-68562232-68562265	chr13:68562232-68562265	1.77644	1.54848e-08	17.9834
AT_rich_chr6-4540962-4540990	chr6:4540962-4540990	-1.98773	1.58232e-08	17.9618
MLTR13_chr7-78908889-78909955	chr7:78908889-78909955	1.43873	1.58739e-08	17.9586
RLTR12E_chr5-30667773-30668150	chr5:30667773-30668150	-3.09053	1.66086e-08	17.9133
B3_chr18-60247948-60248144	chr18:60247948-60248144	4.18743	1.66274e-08	17.9122
MLT1J_chr2-69796355-69796619	chr2:69796355-69796619	1.47203	1.70518e-08	17.887
RSINE1_chr8-107184204-107184340	chr8:107184204-107184340	1.26235	1.71411e-08	17.8818
MER5A_chr6-143332477-143332556	chr6:143332477-143332556	2.56757	1.7602e-08	17.8553
MIRb_chr4-134538158-134538299	chr4:134538158-134538299	-1.25853	1.78097e-08	17.8435
L1VL4_chr11-83002328-83002685	chr11:83002328-83002685	3.42966	1.80746e-08	17.8288
B1_Mur2_chr17-36000001-36000137	chr17:36000001-36000137	3.52241	1.84139e-08	17.8102
B1_Mur4_chr7-118843637-118843769	chr7:118843637-118843769	1.79003	1.84139e-08	17.8102
L2b_chr15-78929240-78929310	chr15:78929240-78929310	-3.13343	1.84139e-08	17.8102
MTE-int_chr17-78852949-78853085	chr17:78852949-78853085	2.20849	1.84139e-08	17.8102
RMER17D_chr3-51521114-51521251	chr3:51521114-51521251	1.50332	1.86271e-08	17.7987
PB1_chr1-34437053-34437133	chr1:34437053-34437133	2.00789	1.9319e-08	17.7622
B1_Mm_chr10-86836268-86836414	chr10:86836268-86836414	1.87317	1.93496e-08	17.7606
L1Md_A_chr17-35384353-35384635	chr17:35384353-35384635	3.37831	1.975e-08	17.7401
B4_chr18-60247487-60247749	chr18:60247487-60247749	5.33728	2.00989e-08	17.7226
MLT1J_chr12-35694440-35694611	chr12:35694440-35694611	8.79986	2.0273e-08	17.714
GA-rich_chr4-49650126-49650240	chr4:49650126-49650240	1.72845	2.04535e-08	17.7051
(CATA)n_chr2-157556919-157557013	chr2:157556919-157557013	1.44299	2.08932e-08	17.6838
CT-rich_chr11-69680582-69680620	chr11:69680582-69680620	1.52893	2.16446e-08	17.6485
B2_Mm2_chr13-33953397-33953583	chr13:33953397-33953583	1.90109	2.17123e-08	17.6454
MIRc_chr4-136546692-136546811	chr4:136546692-136546811	1.7644	2.17897e-08	17.6418
Lx3B_chr17-12822998-12825636	chr17:12822998-12825636	-2.55194	2.23901e-08	17.6146
MTB_Mm_chr2-105385907-105386318	chr2:105385907-105386318	-2.29683	2.25863e-08	17.6059
RLTR17B_Mm_chr5-120753872-120754080	chr5:120753872-120754080	8.03708	2.25863e-08	17.6059
Lx2_chr19-4411416-4412805	chr19:4411416-4412805	2.08514	2.28969e-08	17.5923
(CA)n_chr7-118487788-118487829	chr7:118487788-118487829	1.98393	2.32145e-08	17.5785
B1_Mur4_chr2-144539410-144539475	chr2:144539410-144539475	1.98781	2.33911e-08	17.5709
L1MB2_chr1-37416839-37417444	chr1:37416839-37417444	1.30152	2.33911e-08	17.5709
Lx9_chrX-153685166-153685580	chrX:153685166-153685580	-4.37678	2.38688e-08	17.5507
(CCA)n_chrX-150806834-150806937	chrX:150806834-150806937	-2.19869	2.39514e-08	17.5472
B3_chr14-8090783-8091004	chr14:8090783-8091004	1.90221	2.41869e-08	17.5375
GA-rich_chr4-133578282-133578319	chr4:133578282-133578319	2.29348	2.42894e-08	17.5332
L3_chr2-121451405-121451501	chr2:121451405-121451501	1.44309	2.44009e-08	17.5286
B1_Mus2_chr2-129133675-129133785	chr2:129133675-129133785	1.55619	2.53087e-08	17.4921
B3_chr17-46499057-46499245	chr17:46499057-46499245	1.51143	2.56697e-08	17.478
Tigger14a_chr10-100098124-100098264	chr10:100098124-100098264	1.85076	2.64023e-08	17.4498
AT_rich_chr19-44303912-44303940	chr19:44303912-44303940	-3.76465	2.65528e-08	17.4441
PB1D10_chr7-29167206-29167313	chr7:29167206-29167313	-2.99206	2.67154e-08	17.438
L2b_chr2-30030418-30030506	chr2:30030418-30030506	-1.29295	2.71398e-08	17.4223
B1_Mus2_chr12-112614490-112614635	chr12:112614490-112614635	-1.86686	2.80524e-08	17.3892
L1_Mus3_chr4-89238892-89243070	chr4:89238892-89243070	-2.27228	2.85947e-08	17.37
B1_Mur1_chr10-128557971-128558084	chr10:128557971-128558084	1.08076	2.94336e-08	17.3411
Lx5_chr17-82401461-82401867	chr17:82401461-82401867	4.19072	2.96443e-08	17.334
MER102a_chr9-35275759-35275963	chr9:35275759-35275963	1.53784	3.1814e-08	17.2634
ORR1C1_chr1-85682796-85683173	chr1:85682796-85683173	3.44565	3.1814e-08	17.2634
(CA)n_chr13-91796899-91796955	chr13:91796899-91796955	1.50929	3.28277e-08	17.232
B3A_chr2-128772378-128772562	chr2:128772378-128772562	-2.17633	3.33223e-08	17.217
(CCTG)n_chr6-34598556-34598584	chr6:34598556-34598584	2.24179	3.35098e-08	17.2114
MTE2a_chr4-124943470-124943776	chr4:124943470-124943776	1.60079	3.40428e-08	17.1956
(TA)n_chr3-69074021-69074046	chr3:69074021-69074046	1.91318	3.45202e-08	17.1817
B1F_chr4-132356937-132357055	chr4:132356937-132357055	1.50283	3.59461e-08	17.1412
IAPEY4_I-int_chr7-27934071-27941739	chr7:27934071-27941739	1.85667	3.59461e-08	17.1412
AT_rich_chrX-151934740-151934767	chrX:151934740-151934767	-1.82032	3.61671e-08	17.1351
GA-rich_chr10-108260903-108260979	chr10:108260903-108260979	1.49641	3.66123e-08	17.1229
GC_rich_chr6-131388063-131388208	chr6:131388063-131388208	1.98093	3.66721e-08	17.1212
B1_Mus1_chr19-38788282-38788400	chr19:38788282-38788400	1.43879	3.69769e-08	17.113
CT-rich_chr17-45570389-45570564	chr17:45570389-45570564	1.5277	3.70902e-08	17.1099
Lx5_chr17-82402322-82402649	chr17:82402322-82402649	4.46726	3.70902e-08	17.1099
(CCA)n_chr15-78929400-78929430	chr15:78929400-78929430	-2.63031	3.75502e-08	17.0976
CT-rich_chr19-12776871-12776956	chr19:12776871-12776956	1.40004	3.89736e-08	17.0604
B1_Mus2_chr1-86349186-86349241	chr1:86349186-86349241	1.58762	3.92078e-08	17.0544
(CCCCG)n_chr1-134361675-134361770	chr1:134361675-134361770	2.61515	4.01103e-08	17.0316
CT-rich_chr10-80714065-80714099	chr10:80714065-80714099	1.56867	4.20343e-08	16.9848
ID_B1_chr2-71857492-71857684	chr2:71857492-71857684	-1.23549	4.27271e-08	16.9684
(TTTG)n_chr9-21749164-21749207	chr9:21749164-21749207	-2.95476	4.32559e-08	16.9561
ORR1C2_chr13-68232594-68232828	chr13:68232594-68232828	7.31354	4.45019e-08	16.9277
(CCCCAG)n_chr7-118973329-118973349	chr7:118973329-118973349	-2.67503	4.49662e-08	16.9174
MMSAT4_chr5-138606354-138607160	chr5:138606354-138607160	1.18505	4.64548e-08	16.8848
(TA)n_chr7-3299184-3299225	chr7:3299184-3299225	-1.52926	4.6689e-08	16.8798
MurSatRep1_chr2-176807294-176808881	chr2:176807294-176808881	1.49671	4.73601e-08	16.8655
Lx8b_chr4-89237176-89237791	chr4:89237176-89237791	-2.6604	4.76105e-08	16.8602
MurSatRep1_chr9-19642576-19642747	chr9:19642576-19642747	1.71388	4.79255e-08	16.8536
(GAAA)n_chr14-54441197-54441309	chr14:54441197-54441309	-1.45075	4.80691e-08	16.8506
Lx_chr5-33784491-33785342	chr5:33784491-33785342	2.44651	4.88057e-08	16.8354
PB1D9_chr1-37892921-37892967	chr1:37892921-37892967	1.38944	4.88057e-08	16.8354
MIRc_chr19-5449944-5450003	chr19:5449944-5450003	2.37977	4.88216e-08	16.8351
L1ME3E_chr9-35186257-35186414	chr9:35186257-35186414	1.86369	5.04674e-08	16.8019
(TCTG)n_chr5-120123149-120123179	chr5:120123149-120123179	2.25163	5.05176e-08	16.8009
(CAAA)n_chr9-31149730-31149753	chr9:31149730-31149753	-1.56404	5.11941e-08	16.7876
B1_Mur1_chr10-86837210-86837359	chr10:86837210-86837359	1.43411	5.22968e-08	16.7663
PB1D10_chr18-46732998-46733086	chr18:46732998-46733086	1.62832	5.26328e-08	16.7599
MLTR18B_MM_chr3-104823695-104824276	chr3:104823695-104824276	1.23125	5.31873e-08	16.7494
RMER1C_chr8-61912586-61913107	chr8:61912586-61913107	8.16584	5.49828e-08	16.7162
MIR3_chr10-60763588-60763637	chr10:60763588-60763637	-1.33955	5.73973e-08	16.6733
B2_Mm2_chr12-8284102-8284284	chr12:8284102-8284284	1.48245	6.11044e-08	16.6107
RMER6C_chr15-29703667-29704514	chr15:29703667-29704514	8.26071	6.1194e-08	16.6092
L3b_chr5-88756137-88756234	chr5:88756137-88756234	1.59828	6.33955e-08	16.5739
MIRc_chrX-97338103-97338325	chrX:97338103-97338325	1.68157	6.70031e-08	16.5185
MTD_chr12-35672401-35672803	chr12:35672401-35672803	4.1649	6.70031e-08	16.5185
(GAA)n_chr1-91115519-91115562	chr1:91115519-91115562	1.74575	6.79249e-08	16.5049
RMER21A_chr1-75240838-75240976	chr1:75240838-75240976	2.04684	6.97456e-08	16.4784
G-rich_chr7-45920170-45920240	chr7:45920170-45920240	-2.87585	7.06489e-08	16.4655
MIRb_chr1-176911293-176911520	chr1:176911293-176911520	8.69914	7.06489e-08	16.4655
MIRb_chr4-118414871-118415098	chr4:118414871-118415098	1.27046	7.13081e-08	16.4563
ID_B1_chr16-14479426-14479627	chr16:14479426-14479627	2.62241	7.14315e-08	16.4545
ID_B1_chr3-88411147-88411287	chr3:88411147-88411287	1.49774	7.21343e-08	16.4447
MTD_chr18-88886921-88887305	chr18:88886921-88887305	1.63038	7.30256e-08	16.4325
LTR72_RN_chr17-46774537-46774680	chr17:46774537-46774680	1.17829	7.32495e-08	16.4294
RLTR6_Mm_chr4-12137566-12138153	chr4:12137566-12138153	5.94181	7.7886e-08	16.368
MTE2b_chr1-173646712-173647055	chr1:173646712-173647055	4.36864	8.13224e-08	16.3248
B1_Mus1_chr18-78100697-78100816	chr18:78100697-78100816	-1.98599	8.17493e-08	16.3196
(CAGA)n_chr1-37987612-37987639	chr1:37987612-37987639	1.13012	8.35876e-08	16.2974
PB1D9_chr8-88171160-88171279	chr8:88171160-88171279	1.15213	8.42491e-08	16.2895
PB1D10_chr8-75096432-75096516	chr8:75096432-75096516	2.97939	8.47623e-08	16.2834
GC_rich_chr3-123267498-123267522	chr3:123267498-123267522	2.30324	8.52141e-08	16.2781
B1_Mur1_chr8-116982225-116982347	chr8:116982225-116982347	1.13607	8.73809e-08	16.253
L1M4_chr11-60921777-60921900	chr11:60921777-60921900	2.07184	8.77723e-08	16.2485
RLTR6-int_chr12-116402644-116403856	chr12:116402644-116403856	-1.61445	8.83784e-08	16.2416
MIR3_chr2-160891975-160892127	chr2:160891975-160892127	2.21627	8.8718e-08	16.2378
L1_Mus3_chr1-194905387-194908447	chr1:194905387-194908447	7.19173	9.15737e-08	16.2061
B1_Mur2_chr1-40446313-40446400	chr1:40446313-40446400	3.06462	9.15819e-08	16.206
MMVL30-int_chr17-21474542-21475229	chr17:21474542-21475229	1.10274	9.2868e-08	16.1921
LTR16A_chr10-86837912-86838087	chr10:86837912-86838087	1.21808	9.32922e-08	16.1875
MIRb_chr11-78342495-78342753	chr11:78342495-78342753	-1.22772	9.33575e-08	16.1868
(CCA)n_chr11-77686317-77686385	chr11:77686317-77686385	2.18634	9.3745e-08	16.1827
(TTC)n_chr11-118263762-118263795	chr11:118263762-118263795	1.54286	9.38849e-08	16.1812
(TG)n_chr16-16924628-16924657	chr16:16924628-16924657	1.75833	9.45866e-08	16.1738
G-rich_chr11-70653275-70653327	chr11:70653275-70653327	-2.48696	9.58574e-08	16.1604
ID_B1_chr6-124714256-124714494	chr6:124714256-124714494	-2.13967	9.58841e-08	16.1601
RMER4B_chr1-150034806-150035312	chr1:150034806-150035312	8.43872	9.97144e-08	16.121
(TTTC)n_chr9-49504988-49505065	chr9:49504988-49505065	-2.78995	1.00055e-07	16.1176
T-rich_chr13-13506507-13506562	chr13:13506507-13506562	1.76629	1.00296e-07	16.1151
(TTG)n_chr5-147111063-147111097	chr5:147111063-147111097	1.41918	1.02665e-07	16.0918
B1_Mus2_chr16-35927989-35928136	chr16:35927989-35928136	2.68686	1.02791e-07	16.0906
GA-rich_chr1-173631048-173631095	chr1:173631048-173631095	8.23834	1.0552e-07	16.0644
RLTR20A4_chr7-118487831-118487983	chr7:118487831-118487983	1.74153	1.0552e-07	16.0644
B1_Mur4_chr19-20377235-20377382	chr19:20377235-20377382	-3.40707	1.06581e-07	16.0544
B1_Mus1_chr1-156065898-156066045	chr1:156065898-156066045	1.80203	1.07729e-07	16.0436
(CAG)n_chr3-88167599-88167700	chr3:88167599-88167700	2.03912	1.08158e-07	16.0397
(CAAA)n_chr5-114911609-114911638	chr5:114911609-114911638	4.14905	1.08552e-07	16.036
(CGG)n_chr15-93398395-93398444	chr15:93398395-93398444	2.26061	1.13219e-07	15.9939
B1F_chr17-40876444-40876577	chr17:40876444-40876577	2.31404	1.13693e-07	15.9898
MTEa_chr13-64362124-64362430	chr13:64362124-64362430	-3.02476	1.14431e-07	15.9833
ID2_chr1-74262587-74262665	chr1:74262587-74262665	2.60329	1.15007e-07	15.9783
B1_Mur2_chr8-110975673-110975819	chr8:110975673-110975819	1.28815	1.16541e-07	15.965
RLTR4_MM-int_chr4-134159937-134162061	chr4:134159937-134162061	-1.96303	1.18041e-07	15.9522
MurSatRep1_chr2-150192383-150193091	chr2:150192383-150193091	2.26872	1.18656e-07	15.947
B3_chr8-41266253-41266464	chr8:41266253-41266464	-9.01182	1.19715e-07	15.9382
(GGA)n_chr19-47113428-47113473	chr19:47113428-47113473	1.29935	1.20959e-07	15.9278
(TCTCTG)n_chr19-60764052-60764152	chr19:60764052-60764152	1.49533	1.21135e-07	15.9264
L2a_chr3-10314719-10314793	chr3:10314719-10314793	1.45963	1.21255e-07	15.9254
MER102b_chr11-80821644-80821769	chr11:80821644-80821769	-1.52501	1.21255e-07	15.9254
L1MB1_chr11-114923502-114924018	chr11:114923502-114924018	1.18473	1.21488e-07	15.9235
Charlie8_chr7-118486576-118486709	chr7:118486576-118486709	1.41855	1.22304e-07	15.9168
(A)n_chr14-99313407-99313448	chr14:99313407-99313448	3.25534	1.22624e-07	15.9141
(TCTCTG)n_chr4-121147578-121147641	chr4:121147578-121147641	1.44532	1.23336e-07	15.9084
C-rich_chr9-41589605-41589740	chr9:41589605-41589740	-1.40681	1.23928e-07	15.9036
AT_rich_chr7-118972255-118972283	chr7:118972255-118972283	-3.11983	1.2762e-07	15.8742
(GGA)n_chr7-24515086-24515116	chr7:24515086-24515116	1.83058	1.31071e-07	15.8475
B1_Mur4_chr2-181552101-181552239	chr2:181552101-181552239	1.31826	1.32264e-07	15.8385
RLTR46B_chr6-3333360-3333740	chr6:3333360-3333740	1.9084	1.35187e-07	15.8166
CT-rich_chrX-163953569-163953633	chrX:163953569-163953633	1.42885	1.39011e-07	15.7887
PB1D10_chr7-44249510-44249595	chr7:44249510-44249595	1.32987	1.39978e-07	15.7818
L1Md_T_chr13-67014519-67019742	chr13:67014519-67019742	2.93164	1.41237e-07	15.7728
CT-rich_chr5-74572501-74572547	chr5:74572501-74572547	1.31297	1.42603e-07	15.7632
L2c_chr6-144999425-144999528	chr6:144999425-144999528	1.37847	1.43965e-07	15.7537
CT-rich_chr2-156172878-156173024	chr2:156172878-156173024	1.29578	1.46954e-07	15.7331
Charlie1b_chr2-125099411-125099882	chr2:125099411-125099882	-2.67706	1.48453e-07	15.723
(CA)n_chr6-112946916-112947039	chr6:112946916-112947039	2.23041	1.5099e-07	15.7061
RSINE1_chr17-35999019-35999165	chr17:35999019-35999165	3.5196	1.51021e-07	15.7058
MIR_chr13-13359907-13360024	chr13:13359907-13360024	1.79282	1.52715e-07	15.6947
B4_chr4-56806455-56806632	chr4:56806455-56806632	1.87151	1.53067e-07	15.6924
B3A_chr8-107387019-107387207	chr8:107387019-107387207	2.80016	1.55704e-07	15.6753
RLTR14_chr17-35995989-35996232	chr17:35995989-35996232	3.27413	1.63089e-07	15.629
B1_Mus1_chr11-69391109-69391257	chr11:69391109-69391257	1.37523	1.64732e-07	15.6189
ORR1C2_chr3-40793460-40793834	chr3:40793460-40793834	1.77502	1.64732e-07	15.6189
ORR1A2-int_chr8-94041596-94043503	chr8:94041596-94043503	1.5392	1.65515e-07	15.6142
RSINE1_chr11-105140064-105140167	chr11:105140064-105140167	1.6015	1.66115e-07	15.6106
(TG)n_chr5-88758439-88758496	chr5:88758439-88758496	1.40976	1.6612e-07	15.6106
MER50B_chr1-172198037-172198168	chr1:172198037-172198168	1.44884	1.6732e-07	15.6034
L1ME1_chr3-62467935-62468423	chr3:62467935-62468423	-1.75744	1.67768e-07	15.6007
B1_Mur2_chr2-173213788-173213930	chr2:173213788-173213930	5.56777	1.75971e-07	15.5529
PB1D9_chr10-80686373-80686488	chr10:80686373-80686488	1.63905	1.76138e-07	15.552
LTRIS_Mus_chr19-9879732-9880318	chr19:9879732-9880318	-3.29242	1.79352e-07	15.5339
(CA)n_chr7-132236440-132236507	chr7:132236440-132236507	-3.02923	1.82267e-07	15.5178
MTD_chr1-176908554-176908955	chr1:176908554-176908955	7.24557	1.82815e-07	15.5148
(GGA)n_chr1-59710502-59710537	chr1:59710502-59710537	1.22124	1.84146e-07	15.5075
LFSINE_Vert_chr13-119694983-119695056	chr13:119694983-119695056	-3.04069	1.91933e-07	15.4661
CT-rich_chr8-22548001-22548180	chr8:22548001-22548180	2.29538	1.92688e-07	15.4622
(TTC)n_chr4-130316658-130316694	chr4:130316658-130316694	1.45034	1.92747e-07	15.4619
ORR1B2_chr7-41627807-41628158	chr7:41627807-41628158	1.6043	1.94857e-07	15.451
B3_chr2-140120299-140120500	chr2:140120299-140120500	1.27148	1.99023e-07	15.4298
MT2B1_chr3-96222787-96223134	chr3:96222787-96223134	-2.06365	1.99776e-07	15.4261
L1MEc_chr1-180866846-180867045	chr1:180866846-180867045	1.77016	1.99931e-07	15.4253
MamSINE1_chr9-108747810-108747865	chr9:108747810-108747865	1.81415	2.0497e-07	15.4004
(CA)n_chr14-47256804-47257251	chr14:47256804-47257251	-3.39502	2.13291e-07	15.3606
B4_chr10-85888445-85888542	chr10:85888445-85888542	1.62202	2.16315e-07	15.3465
ID_B1_chr5-136149890-136150047	chr5:136149890-136150047	1.65024	2.18675e-07	15.3357
MIR3_chr4-46605639-46605686	chr4:46605639-46605686	3.39574	2.24751e-07	15.3083
RSINE1_chr11-6257559-6257696	chr11:6257559-6257696	2.63506	2.24941e-07	15.3074
B1_Mus1_chr7-19246675-19246821	chr7:19246675-19246821	1.47039	2.25967e-07	15.3029
B1_Mus2_chr11-105140281-105140397	chr11:105140281-105140397	1.60252	2.25967e-07	15.3029
L1MC4_chr11-3457795-3458006	chr11:3457795-3458006	1.94174	2.25967e-07	15.3029
ORR1A2_chr5-151314812-151315064	chr5:151314812-151315064	3.34479	2.2764e-07	15.2955
MTC-int_chr5-120900457-120901411	chr5:120900457-120901411	4.23121	2.30798e-07	15.2817
(GA)n_chr10-93889695-93889737	chr10:93889695-93889737	1.77008	2.34265e-07	15.2668
C-rich_chr10-45067217-45067316	chr10:45067217-45067316	2.12866	2.41238e-07	15.2375
L2a_chr7-110811943-110812007	chr7:110811943-110812007	2.29245	2.41238e-07	15.2375
(TCC)n_chr6-47808288-47808317	chr6:47808288-47808317	1.64957	2.42289e-07	15.2331
(CA)n_chr2-120600035-120600058	chr2:120600035-120600058	1.46055	2.45809e-07	15.2187
(CA)n_chr1-173630958-173631020	chr1:173630958-173631020	5.46331	2.45931e-07	15.2182
(TC)n_chr7-132236566-132236625	chr7:132236566-132236625	-2.96644	2.52144e-07	15.1933
ID_B1_chr2-165490901-165491084	chr2:165490901-165491084	1.65757	2.52763e-07	15.1908
PB1D10_chr13-91796779-91796862	chr13:91796779-91796862	1.33048	2.54432e-07	15.1842
IMPB_01_chrY-90812198-90812916	chrY:90812198-90812916	-2.75065	2.55368e-07	15.1806
B1F1_chr1-156067294-156067445	chr1:156067294-156067445	1.50364	2.55495e-07	15.1801
(TCTA)n_chr1-40446235-40446313	chr1:40446235-40446313	3.83369	2.61592e-07	15.1565
B3_chr16-92082893-92083064	chr16:92082893-92083064	-1.29119	2.62865e-07	15.1516
L1VL2_chr9-101217186-101219439	chr9:101217186-101219439	3.55105	2.72009e-07	15.1174
B4_chr6-47806907-47807006	chr6:47806907-47807006	1.44392	2.8303e-07	15.0777
(TGG)n_chr3-30965839-30965862	chr3:30965839-30965862	1.89594	2.85246e-07	15.0699
MamGypLTR3a_chr9-79705575-79705636	chr9:79705575-79705636	2.58137	2.94088e-07	15.0394
MER102a_chr9-7205968-7206176	chr9:7205968-7206176	2.03789	2.99099e-07	15.0225
CT-rich_chr3-129825554-129825607	chr3:129825554-129825607	1.44348	3.05127e-07	15.0025
PB1D10_chr11-60786129-60786222	chr11:60786129-60786222	2.32145	3.05127e-07	15.0025
(TG)n_chr2-26349850-26349897	chr2:26349850-26349897	1.69786	3.05361e-07	15.0018
Arthur1B_chr14-105681769-105681827	chr14:105681769-105681827	2.27276	3.05864e-07	15.0001
(CCA)n_chr2-113525704-113525736	chr2:113525704-113525736	2.89953	3.11203e-07	14.9828
GA-rich_chr6-34746309-34746472	chr6:34746309-34746472	1.34683	3.11203e-07	14.9828
MIRb_chr4-101465969-101466075	chr4:101465969-101466075	2.46117	3.11754e-07	14.9811
Tigger19a_chr11-75704782-75704889	chr11:75704782-75704889	1.18052	3.11754e-07	14.9811
ID_B1_chr13-13510300-13510489	chr13:13510300-13510489	1.59531	3.15337e-07	14.9696
ORR1A2-int_chr6-38619315-38621161	chr6:38619315-38621161	2.89341	3.18818e-07	14.9586
MMSAT4_chr8-69228515-69228905	chr8:69228515-69228905	1.70365	3.24783e-07	14.9401
BC1_Mm_chr19-17400188-17400274	chr19:17400188-17400274	1.27418	3.24838e-07	14.9399
(CA)n_chr15-97745105-97745139	chr15:97745105-97745139	-2.08547	3.26658e-07	14.9344
CT-rich_chr2-140164358-140164424	chr2:140164358-140164424	1.7985	3.31597e-07	14.9193
L1Md_F3_chr2-13580764-13580869	chr2:13580764-13580869	-2.90277	3.33976e-07	14.9122
(TCC)n_chr4-133534504-133534544	chr4:133534504-133534544	1.36691	3.35659e-07	14.9072
(CA)n_chr11-109397672-109397739	chr11:109397672-109397739	1.79922	3.44633e-07	14.8808
(CGG)n_chr6-66896474-66896511	chr6:66896474-66896511	2.25519	3.45043e-07	14.8796
ID_chr13-13510235-13510278	chr13:13510235-13510278	1.56573	3.46053e-07	14.8767
AT_rich_chr11-8433776-8433798	chr11:8433776-8433798	1.47684	3.47462e-07	14.8726
B3_chr4-116699668-116699749	chr4:116699668-116699749	2.29823	3.47569e-07	14.8723
(CA)n_chr9-14332413-14332441	chr9:14332413-14332441	-2.63122	3.48306e-07	14.8702
GC_rich_chr18-34931869-34931899	chr18:34931869-34931899	2.5021	3.48919e-07	14.8684
RLTR31B2_chr15-93489865-93490033	chr15:93489865-93490033	1.32521	3.51245e-07	14.8618
X5B_LINE_chr11-4668589-4668684	chr11:4668589-4668684	1.52572	3.53542e-07	14.8553
GA-rich_chr1-180736693-180736827	chr1:180736693-180736827	1.82862	3.57494e-07	14.8441
AT_rich_chr2-118126756-118126778	chr2:118126756-118126778	1.6467	3.63158e-07	14.8284
B3A_chrX-77762451-77762576	chrX:77762451-77762576	1.94139	3.66368e-07	14.8196
BC1_Mm_chr11-58221997-58222075	chr11:58221997-58222075	2.89396	3.67778e-07	14.8158
MurSatRep1_chr9-22235025-22235135	chr9:22235025-22235135	2.14604	3.67928e-07	14.8154
RMER30_chr9-103328017-103328193	chr9:103328017-103328193	-3.27838	3.70871e-07	14.8074
RLTR6-int_chr13-68442548-68450156	chr13:68442548-68450156	5.44441	3.73037e-07	14.8016
ID_B1_chr16-35926867-35926966	chr16:35926867-35926966	2.268	3.74056e-07	14.7989
MTD-int_chr17-33384117-33384869	chr17:33384117-33384869	-2.78938	3.76627e-07	14.792
GC_rich_chr3-87906594-87906627	chr3:87906594-87906627	1.7602	3.89535e-07	14.7583
(TTTTG)n_chr18-66465396-66465426	chr18:66465396-66465426	3.42898	3.93242e-07	14.7488
B1_Mus2_chr8-122578246-122578386	chr8:122578246-122578386	-2.35568	3.9435e-07	14.746
B1F1_chr13-68568948-68569056	chr13:68568948-68569056	2.11076	3.9435e-07	14.746
PB1D10_chr15-84946976-84947080	chr15:84946976-84947080	1.65716	3.98764e-07	14.7349
LTR10_RN_chr18-24004403-24004824	chr18:24004403-24004824	1.36793	4.00732e-07	14.73
PB1D11_chr11-78524724-78524808	chr11:78524724-78524808	1.64411	4.2378e-07	14.6741
RMER6A_chr8-39620200-39620983	chr8:39620200-39620983	6.8651	4.27126e-07	14.6662
Tigger16a_chr9-14330599-14330761	chr9:14330599-14330761	-2.37512	4.34634e-07	14.6488
(TTTA)n_chr9-108205223-108205255	chr9:108205223-108205255	-1.7251	4.44384e-07	14.6266
L1_Mus2_chr9-89930694-89936858	chr9:89930694-89936858	-4.86067	4.50912e-07	14.612
(T)n_chr10-120361630-120361659	chr10:120361630-120361659	1.06413	4.52128e-07	14.6093
B1_Mur3_chr4-40204678-40204811	chr4:40204678-40204811	2.58101	4.54818e-07	14.6034
MMVL30-int_chr19-3084735-3087036	chr19:3084735-3087036	3.38023	4.80653e-07	14.5481
(TCTCCC)n_chr9-73123000-73123023	chr9:73123000-73123023	1.766	4.86048e-07	14.537
B1_Mur3_chr6-134922616-134922772	chr6:134922616-134922772	-2.77052	4.86048e-07	14.537
GC_rich_chr15-100228052-100228231	chr15:100228052-100228231	2.14394	4.86611e-07	14.5358
Lx7_chr3-70797955-70798134	chr3:70797955-70798134	1.46257	4.86611e-07	14.5358
RLTR17B_Mm_chr4-59474473-59474603	chr4:59474473-59474603	1.55829	5.0643e-07	14.4959
RLTR20A4_chr18-34771357-34771418	chr18:34771357-34771418	1.56997	5.23028e-07	14.4636
(CG)n_chr17-43612046-43612072	chr17:43612046-43612072	-2.31885	5.2736e-07	14.4554
B3A_chr8-107387971-107388162	chr8:107387971-107388162	1.71954	5.28191e-07	14.4538
L1Md_F2_chr2-113661244-113662228	chr2:113661244-113662228	5.68374	5.34648e-07	14.4417
RLTR10_chr1-106730710-106731165	chr1:106730710-106731165	2.2609	5.34648e-07	14.4417
(CA)n_chr5-139360211-139360258	chr5:139360211-139360258	1.6284	5.42932e-07	14.4263
CT-rich_chr19-60762169-60762215	chr19:60762169-60762215	1.26147	5.60282e-07	14.3948
B1_Mur1_chr11-100408762-100408904	chr11:100408762-100408904	-1.8654	5.61023e-07	14.3935
MER2_chr11-62666072-62666363	chr11:62666072-62666363	-1.31017	5.61069e-07	14.3934
RSINE1_chr13-64363476-64363618	chr13:64363476-64363618	-3.23965	5.61069e-07	14.3934
PB1D9_chr19-34586260-34586377	chr19:34586260-34586377	3.19134	5.72988e-07	14.3724
T-rich_chr18-67794574-67794705	chr18:67794574-67794705	1.32679	5.77933e-07	14.3638
MIRb_chr5-91358620-91358818	chr5:91358620-91358818	-1.7662	5.90681e-07	14.342
B3A_chr16-14474987-14475119	chr16:14474987-14475119	2.71192	5.93799e-07	14.3367
Charlie24_chr3-158022754-158022993	chr3:158022754-158022993	1.12831	6.09573e-07	14.3105
MLT1C_chr11-118450990-118451183	chr11:118450990-118451183	-6.83082	6.09573e-07	14.3105
MurERV4_19-int_chr9-22239258-22239630	chr9:22239258-22239630	1.75435	6.12067e-07	14.3064
B1_Mus1_chr9-18314675-18314819	chr9:18314675-18314819	1.89045	6.33551e-07	14.2719
(GGA)n_chr14-55746395-55746430	chr14:55746395-55746430	1.53787	6.39442e-07	14.2627
(CAG)n_chr12-8728852-8728874	chr12:8728852-8728874	1.61928	6.59732e-07	14.2314
Lx4A_chr3-145676858-145677805	chr3:145676858-145677805	1.55016	6.69062e-07	14.2174
PB1D7_chr19-10502127-10502252	chr19:10502127-10502252	1.28269	6.74044e-07	14.21
B4_chr2-128802479-128802741	chr2:128802479-128802741	-1.84269	6.90267e-07	14.1862
RLTR15_chr7-144920657-144920958	chr7:144920657-144920958	1.45159	6.911e-07	14.185
AT_rich_chr11-6474760-6474783	chr11:6474760-6474783	1.64976	6.94524e-07	14.18
MMSAT4_chr17-21463753-21465444	chr17:21463753-21465444	1.21447	6.96431e-07	14.1773
ID_B1_chr8-27054162-27054235	chr8:27054162-27054235	1.42195	7.04529e-07	14.1657
B1_Mur2_chr8-72424301-72424430	chr8:72424301-72424430	2.20851	7.0753e-07	14.1615
B1_Mus2_chr1-45856834-45856981	chr1:45856834-45856981	5.37583	7.11385e-07	14.1561
ID4__chr11-71026149-71026191	chr11:71026149-71026191	1.45962	7.22906e-07	14.14
(TTTA)n_chr4-13519126-13519174	chr4:13519126-13519174	3.97727	7.31673e-07	14.1279
ID_B1_chr11-52386668-52386851	chr11:52386668-52386851	-4.02886	7.31673e-07	14.1279
MIR3_chr18-39682117-39682211	chr18:39682117-39682211	7.82357	7.31673e-07	14.1279
MER88_chr17-36002007-36002166	chr17:36002007-36002166	3.47661	7.33254e-07	14.1258
Lx7_chr8-12016026-12017090	chr8:12016026-12017090	8.11404	7.43241e-07	14.1122
RLTR16_chr16-62734545-62734920	chr16:62734545-62734920	1.77433	7.54979e-07	14.0966
(GAA)n_chr11-23363977-23364059	chr11:23363977-23364059	1.35941	7.6442e-07	14.0841
C-rich_chr2-102400200-102400431	chr2:102400200-102400431	1.6228	7.67786e-07	14.0798
L1MA7_chr3-145107344-145107789	chr3:145107344-145107789	3.31657	7.67786e-07	14.0798
RLTR46B_chr6-3341286-3341607	chr6:3341286-3341607	2.22265	7.67786e-07	14.0798
MIR3_chr12-104930290-104930423	chr12:104930290-104930423	-1.45438	7.70878e-07	14.0757
PB1_chr9-106471009-106471130	chr9:106471009-106471130	1.52094	7.74463e-07	14.0711
LTR78B_chr9-64214379-64214536	chr9:64214379-64214536	1.30717	7.87683e-07	14.0542
U6_chr7-104340089-104340195	chr7:104340089-104340195	2.58743	7.93257e-07	14.0471
(CCA)n_chr4-55009658-55009735	chr4:55009658-55009735	1.99703	8.16953e-07	14.0177
ID_B1_chr11-71024456-71024664	chr11:71024456-71024664	1.32416	8.26141e-07	14.0065
RMER6A_chr11-117853958-117854652	chr11:117853958-117854652	-2.5223	8.33146e-07	13.9981
A-rich_chr4-141113664-141113700	chr4:141113664-141113700	1.66026	8.37014e-07	13.9934
(TTTTTG)n_chr12-30895583-30895606	chr12:30895583-30895606	1.27265	8.47359e-07	13.9811
RSINE1_chr6-135312371-135312511	chr6:135312371-135312511	3.31229	8.47359e-07	13.9811
(CCCCAG)n_chrX-150806951-150807116	chrX:150806951-150807116	-1.65962	8.8009e-07	13.9432
(CATATA)n_chr15-98541599-98541657	chr15:98541599-98541657	1.67416	8.87779e-07	13.9345
MMSAT4_chr11-49217274-49217407	chr11:49217274-49217407	1.32551	8.99879e-07	13.921
Lx5c_chr5-123527008-123528482	chr5:123527008-123528482	1.17939	9.05226e-07	13.9151
L1MB3_chr17-35999266-35999449	chr17:35999266-35999449	3.00331	9.05746e-07	13.9145
RLTR20A4_chr15-98542501-98542636	chr15:98542501-98542636	1.62928	9.28617e-07	13.8896
(TCC)n_chr2-22823554-22823581	chr2:22823554-22823581	1.30387	9.33625e-07	13.8842
RLTR4_Mm_chr17-35000212-35000512	chr17:35000212-35000512	-1.90872	9.45345e-07	13.8717
(TGG)n_chr6-24619365-24619499	chr6:24619365-24619499	1.52558	9.53746e-07	13.8629
RLTR25B_chr19-34650691-34651204	chr19:34650691-34651204	7.73256	9.55304e-07	13.8612
(CA)n_chr5-108706156-108706179	chr5:108706156-108706179	-1.82038	9.67167e-07	13.8489
PB1_chr7-135683862-135683977	chr7:135683862-135683977	1.91932	9.68479e-07	13.8475
ID_B1_chr9-44148874-44149077	chr9:44148874-44149077	1.43229	9.68938e-07	13.8471
L1_Mus1_chr13-74325087-74326718	chr13:74325087-74326718	-2.76532	9.68938e-07	13.8471
IAPEY4_I-int_chr16-90345438-90349546	chr16:90345438-90349546	2.67815	9.98652e-07	13.8169
GA-rich_chr1-40464859-40464920	chr1:40464859-40464920	3.57701	1.00668e-06	13.8088
B4A_chr17-31495751-31495871	chr17:31495751-31495871	1.7745	1.03501e-06	13.7811
ID_B1_chr17-45588628-45588825	chr17:45588628-45588825	-3.71154	1.03501e-06	13.7811
(TTTG)n_chr11-101973917-101973946	chr11:101973917-101973946	2.26077	1.03511e-06	13.781
	#VALUE!

## Sheet: Extended Data Table 6
Extended Data Table 6: Differential expression of retroelements from RNA-seq analysis of 1445 cells with Kdm5b sg vs Ctl
Name	baseMean	log2FoldChange	lfcSE	stat	pvalue	padj	neglogp	signame	class.x	clade.x	class.y	clade.y	class.x	clade.x	class.y	clade.y
B1	18216.5	-0.0819132	0.0743897	-1.10114	0.270837	0.443188	0.813761	NA	SINE	Non-LTR Retrotransposon	SINE	Non-LTR Retrotransposon	SINE	Non-LTR Retrotransposon	SINE	Non-LTR Retrotransposon
B1F	31.5757	0.582417	0.339229	1.71688	0.0860005	0.208386	1.56836	NA	SINE	Non-LTR Retrotransposon	SINE	Non-LTR Retrotransposon	SINE	Non-LTR Retrotransposon	SINE	Non-LTR Retrotransposon
B2	20487.7	-0.427291	0.285871	-1.4947	0.134994	0.269988	1.30938	NA	SINE	Non-LTR Retrotransposon	SINE	Non-LTR Retrotransposon	SINE	Non-LTR Retrotransposon	SINE	Non-LTR Retrotransposon
BC1_Cp	0	NA	NA	NA	NA	NA	NA	NA	SINE	Non-LTR Retrotransposon	SINE	Non-LTR Retrotransposon	SINE	Non-LTR Retrotransposon	SINE	Non-LTR Retrotransposon
BGLII	17.2062	-0.547099	0.515585	-1.06112	0.288634	0.460353	0.775761	NA	ERV2	Endogenous Retrovirus	ERV2	Endogenous Retrovirus	ERV2	Endogenous Retrovirus	ERV2	Endogenous Retrovirus
BGLII_C	0.673452	-1.92412	1.82626	-1.05358	0.292073	NA	NA	NA	ERV2	Endogenous Retrovirus	ERV2	Endogenous Retrovirus	ERV2	Endogenous Retrovirus	ERV2	Endogenous Retrovirus
BGLII_Mus	30.8901	0.150032	0.337961	0.443933	0.657091	0.793189	0.231694	NA	ERV2	Endogenous Retrovirus	ERV2	Endogenous Retrovirus	ERV2	Endogenous Retrovirus	ERV2	Endogenous Retrovirus
ERVB2_1A-I_MM	11.0857	-0.0443249	0.518079	-0.0855563	0.931819	0.954546	0.046519	NA	ERV2	Endogenous Retrovirus	ERV2	Endogenous Retrovirus	ERV2	Endogenous Retrovirus	ERV2	Endogenous Retrovirus
ERVB4_1-I_MM	12.7163	-0.599631	0.510789	-1.17393	0.240423	0.420055	0.867369	NA	ERV2	Endogenous Retrovirus	ERV2	Endogenous Retrovirus	ERV2	Endogenous Retrovirus	ERV2	Endogenous Retrovirus
ERVB4_1-LTR_MM	0.315259	-1.15656	2.97403	-0.388886	0.697361	NA	NA	NA	ERV2	Endogenous Retrovirus	ERV2	Endogenous Retrovirus	ERV2	Endogenous Retrovirus	ERV2	Endogenous Retrovirus
ERVB4_1B-I_MM	33.0006	0.275861	0.434618	0.63472	0.525611	0.682752	0.381623	NA	ERV2	Endogenous Retrovirus	ERV2	Endogenous Retrovirus	ERV2	Endogenous Retrovirus	ERV2	Endogenous Retrovirus
ERVB4_1B-LTR_MM	21.5464	-0.403576	0.37848	-1.06631	0.286285	0.460353	0.775761	NA	ERV2	Endogenous Retrovirus	ERV2	Endogenous Retrovirus	ERV2	Endogenous Retrovirus	ERV2	Endogenous Retrovirus
ERVB4_2-I_MM	58.2965	0.766112	0.268191	2.8566	0.00428208	0.0207516	3.87513	NA	ERV2	Endogenous Retrovirus	ERV2	Endogenous Retrovirus	ERV2	Endogenous Retrovirus	ERV2	Endogenous Retrovirus
ERVB4_2-LTR_MM	23.2872	1.05898	0.323244	3.27611	0.00105248	0.0069796	4.96476	NA	ERV2	Endogenous Retrovirus	ERV2	Endogenous Retrovirus	ERV2	Endogenous Retrovirus	ERV2	Endogenous Retrovirus
ERVB4_2B-LTR_MM	35.9305	0.914058	0.359348	2.54365	0.0109699	0.0464056	3.07033	NA	ERV2	Endogenous Retrovirus	ERV2	Endogenous Retrovirus	ERV2	Endogenous Retrovirus	ERV2	Endogenous Retrovirus
ERVB4_3-I_MM	39.0648	1.096	0.426166	2.57176	0.0101183	0.0447334	3.10704	NA	ERV2	Endogenous Retrovirus	ERV2	Endogenous Retrovirus	ERV2	Endogenous Retrovirus	ERV2	Endogenous Retrovirus
ERVB4_3-LTR_MM	2.41355	-0.671997	1.57911	-0.425553	0.670433	0.793189	0.231694	NA	ERV2	Endogenous Retrovirus	ERV2	Endogenous Retrovirus	ERV2	Endogenous Retrovirus	ERV2	Endogenous Retrovirus
ERVB5_1-LTR_MM	0.195849	1.2531	4.25689	0.29437	0.768475	NA	NA	NA	ERV2	Endogenous Retrovirus	ERV2	Endogenous Retrovirus	ERV2	Endogenous Retrovirus	ERV2	Endogenous Retrovirus
ERVB5_2-I_MM	384.734	-0.860811	0.347141	-2.47971	0.0131488	0.0494552	3.00669	NA	ERV2	Endogenous Retrovirus	ERV2	Endogenous Retrovirus	ERV2	Endogenous Retrovirus	ERV2	Endogenous Retrovirus
ERVB5_2-LTR_MM	29.4864	1.10893	0.33747	3.28602	0.00101614	0.00692072	4.97324	NA	ERV2	Endogenous Retrovirus	ERV2	Endogenous Retrovirus	ERV2	Endogenous Retrovirus	ERV2	Endogenous Retrovirus
ERVB7_2-LTR_MM	28.6172	-0.358404	0.324179	-1.10558	0.26891	0.443188	0.813761	NA	ERV2	Endogenous Retrovirus	ERV2	Endogenous Retrovirus	ERV2	Endogenous Retrovirus	ERV2	Endogenous Retrovirus
ERVB7_2B-LTR_MM	58.3042	0.916468	0.265646	3.44996	0.000560668	0.00470961	5.35815	NA	ERV2	Endogenous Retrovirus	ERV2	Endogenous Retrovirus	ERV2	Endogenous Retrovirus	ERV2	Endogenous Retrovirus
ERVB7_3-LTR_MM	18.4339	-1.72837	0.597852	-2.89096	0.00384067	0.0189774	3.96451	NA	ERV2	Endogenous Retrovirus	ERV2	Endogenous Retrovirus	ERV2	Endogenous Retrovirus	ERV2	Endogenous Retrovirus
ERVB7_4-LTR_MM	9.77121	-0.467819	0.558763	-0.83724	0.402457	0.57299	0.556887	NA	ERV2	Endogenous Retrovirus	ERV2	Endogenous Retrovirus	ERV2	Endogenous Retrovirus	ERV2	Endogenous Retrovirus
ETNERV	31.0048	-0.436575	0.377164	-1.15752	0.247059	0.426431	0.852304	NA	ERV2	Endogenous Retrovirus	ERV2	Endogenous Retrovirus	ERV2	Endogenous Retrovirus	ERV2	Endogenous Retrovirus
IAP1-MM_I	244.376	1.15503	0.273614	4.22139	2.42796e-05	0.000339915	7.98682	NA	ERV2	Endogenous Retrovirus	ERV2	Endogenous Retrovirus	ERV2	Endogenous Retrovirus	ERV2	Endogenous Retrovirus
IAP1-MM_LTR	20.0616	1.38746	0.368761	3.7625	0.000168224	0.00176635	6.33884	NA	ERV2	Endogenous Retrovirus	ERV2	Endogenous Retrovirus	ERV2	Endogenous Retrovirus	ERV2	Endogenous Retrovirus
IAPA_MM	212.55	0.0679131	0.195705	0.347018	0.728578	0.828979	0.18756	NA	ERV2	Endogenous Retrovirus	ERV2	Endogenous Retrovirus	ERV2	Endogenous Retrovirus	ERV2	Endogenous Retrovirus
IAPEY2_LTR	16.9775	-0.41096	0.501261	-0.819852	0.4123	0.580445	0.54396	NA	ERV2	Endogenous Retrovirus	ERV2	Endogenous Retrovirus	ERV2	Endogenous Retrovirus	ERV2	Endogenous Retrovirus
IAPEY3_I	59.4373	0.712778	0.278364	2.5606	0.0104493	0.0454002	3.09224	NA	ERV2	Endogenous Retrovirus	ERV2	Endogenous Retrovirus	ERV2	Endogenous Retrovirus	ERV2	Endogenous Retrovirus
IAPEY3_LTR	9.09452	-1.13324	0.642736	-1.76315	0.0778747	0.194301	1.63835	NA	ERV2	Endogenous Retrovirus	ERV2	Endogenous Retrovirus	ERV2	Endogenous Retrovirus	ERV2	Endogenous Retrovirus
IAPEY3C_LTR	54.4976	0.65718	0.262625	2.50235	0.0123372	0.049089	3.01412	NA	ERV2	Endogenous Retrovirus	ERV2	Endogenous Retrovirus	ERV2	Endogenous Retrovirus	ERV2	Endogenous Retrovirus
IAPEY4_I	1322.02	2.33622	0.215554	10.8382	2.26859e-27	1.42921e-25	57.2075	IAPEY4_I	ERV2	Endogenous Retrovirus	ERV2	Endogenous Retrovirus	ERV2	Endogenous Retrovirus	ERV2	Endogenous Retrovirus
IAPEY4_LTR	67.4379	0.360919	0.370181	0.974982	0.329569	0.506411	0.680406	NA	ERV2	Endogenous Retrovirus	ERV2	Endogenous Retrovirus	ERV2	Endogenous Retrovirus	ERV2	Endogenous Retrovirus
IAPEY5_I	86.8327	0.991847	0.257704	3.84878	0.000118709	0.00130064	6.6449	NA	ERV2	Endogenous Retrovirus	ERV2	Endogenous Retrovirus	ERV2	Endogenous Retrovirus	ERV2	Endogenous Retrovirus
IAPEY5_LTR	4.63387	0.41933	0.749709	0.559323	0.575941	0.718501	0.330589	NA	ERV2	Endogenous Retrovirus	ERV2	Endogenous Retrovirus	ERV2	Endogenous Retrovirus	ERV2	Endogenous Retrovirus
IAPEYI	24.6894	0.546862	0.382189	1.43087	0.152468	0.295554	1.2189	NA	ERV2	Endogenous Retrovirus	ERV2	Endogenous Retrovirus	ERV2	Endogenous Retrovirus	ERV2	Endogenous Retrovirus
IAPEZI	3880.86	0.216984	0.195109	1.11211	0.266089	0.443188	0.813761	NA	ERV2	Endogenous Retrovirus	ERV2	Endogenous Retrovirus	ERV2	Endogenous Retrovirus	ERV2	Endogenous Retrovirus
IAPLTR1_Mm	264.431	0.744917	0.153702	4.8465	1.25656e-06	1.86267e-05	10.8909	NA	ERV2	Endogenous Retrovirus	ERV2	Endogenous Retrovirus	ERV2	Endogenous Retrovirus	ERV2	Endogenous Retrovirus
IAPLTR1a_I_MM	2676.6	0.475963	0.179798	2.64721	0.00811594	0.0365217	3.30985	NA	ERV2	Endogenous Retrovirus	ERV2	Endogenous Retrovirus	ERV2	Endogenous Retrovirus	ERV2	Endogenous Retrovirus
IAPLTR1a_MM	204.292	0.957318	0.243131	3.93746	8.2348e-05	0.000943259	6.96617	NA	ERV2	Endogenous Retrovirus	ERV2	Endogenous Retrovirus	ERV2	Endogenous Retrovirus	ERV2	Endogenous Retrovirus
IAPLTR3	1.91161	-2.02946	1.46283	-1.38736	0.165333	0.310925	1.1682	NA	ERV2	Endogenous Retrovirus	ERV2	Endogenous Retrovirus	ERV2	Endogenous Retrovirus	ERV2	Endogenous Retrovirus
IAPLTR3_I	15.3163	0.691292	0.423836	1.63104	0.102883	0.233571	1.45427	NA	ERV2	Endogenous Retrovirus	ERV2	Endogenous Retrovirus	ERV2	Endogenous Retrovirus	ERV2	Endogenous Retrovirus
IAPLTR4	14.2928	0.502426	0.55542	0.904586	0.365684	0.542073	0.612354	NA	ERV2	Endogenous Retrovirus	ERV2	Endogenous Retrovirus	ERV2	Endogenous Retrovirus	ERV2	Endogenous Retrovirus
IAPLTR4_I	83.3044	0.696223	0.203329	3.42413	0.000616781	0.00501383	5.29555	NA	ERV2	Endogenous Retrovirus	ERV2	Endogenous Retrovirus	ERV2	Endogenous Retrovirus	ERV2	Endogenous Retrovirus
L1_MM	162.129	0.594179	0.192317	3.08958	0.0020044	0.0114798	4.46717	NA	L1	Non-LTR Retrotransposon	L1	Non-LTR Retrotransposon	L1	Non-LTR Retrotransposon	L1	Non-LTR Retrotransposon
L1B_MM	604.023	-0.728014	0.20676	-3.52106	0.000429823	0.00373502	5.59	NA	L1	Non-LTR Retrotransposon	L1	Non-LTR Retrotransposon	L1	Non-LTR Retrotransposon	L1	Non-LTR Retrotransposon
L1Lx_I	429.869	-0.205805	0.150027	-1.37179	0.17013	0.316999	1.14886	NA	L1	Non-LTR Retrotransposon	L1	Non-LTR Retrotransposon	L1	Non-LTR Retrotransposon	L1	Non-LTR Retrotransposon
L1Lx_II	172.055	0.460201	0.27427	1.67792	0.0933637	0.21585	1.53317	NA	L1	Non-LTR Retrotransposon	L1	Non-LTR Retrotransposon	L1	Non-LTR Retrotransposon	L1	Non-LTR Retrotransposon
L1Lx_III	373.322	0.0901906	0.11743	0.768038	0.442465	0.609296	0.495452	NA	L1	Non-LTR Retrotransposon	L1	Non-LTR Retrotransposon	L1	Non-LTR Retrotransposon	L1	Non-LTR Retrotransposon
L1Lx_IV	1055.68	0.412897	0.141787	2.9121	0.00359005	0.0184631	3.99198	NA	L1	Non-LTR Retrotransposon	L1	Non-LTR Retrotransposon	L1	Non-LTR Retrotransposon	L1	Non-LTR Retrotransposon
L1MdA_I	615.311	0.486231	0.162455	2.99302	0.00276228	0.0148105	4.21242	NA	L1	Non-LTR Retrotransposon	L1	Non-LTR Retrotransposon	L1	Non-LTR Retrotransposon	L1	Non-LTR Retrotransposon
L1MdA_II	367.017	-0.204014	0.146023	-1.39714	0.162372	0.307652	1.17878	NA	L1	Non-LTR Retrotransposon	L1	Non-LTR Retrotransposon	L1	Non-LTR Retrotransposon	L1	Non-LTR Retrotransposon
L1MdA_III	609.115	0.352121	0.148189	2.37616	0.017494	0.0629785	2.76496	NA	L1	Non-LTR Retrotransposon	L1	Non-LTR Retrotransposon	L1	Non-LTR Retrotransposon	L1	Non-LTR Retrotransposon
L1MdA_IV	387.763	-0.0900706	0.119984	-0.750686	0.452842	0.619112	0.479469	NA	L1	Non-LTR Retrotransposon	L1	Non-LTR Retrotransposon	L1	Non-LTR Retrotransposon	L1	Non-LTR Retrotransposon
L1MdA_V	243.246	0.356771	0.238497	1.49591	0.134676	0.269988	1.30938	NA	L1	Non-LTR Retrotransposon	L1	Non-LTR Retrotransposon	L1	Non-LTR Retrotransposon	L1	Non-LTR Retrotransposon
L1MdA_VI	454.084	0.420897	0.126089	3.33809	0.000843556	0.00590753	5.13153	NA	L1	Non-LTR Retrotransposon	L1	Non-LTR Retrotransposon	L1	Non-LTR Retrotransposon	L1	Non-LTR Retrotransposon
L1MdA_VII	785.07	0.393947	0.155381	2.53536	0.0112331	0.0464056	3.07033	NA	L1	Non-LTR Retrotransposon	L1	Non-LTR Retrotransposon	L1	Non-LTR Retrotransposon	L1	Non-LTR Retrotransposon
L1MdF_I	470.061	0.0427255	0.127159	0.336001	0.73687	0.828979	0.18756	NA	L1	Non-LTR Retrotransposon	L1	Non-LTR Retrotransposon	L1	Non-LTR Retrotransposon	L1	Non-LTR Retrotransposon
L1MdF_II	219.638	-0.440154	0.176644	-2.49175	0.0127115	0.049089	3.01412	NA	L1	Non-LTR Retrotransposon	L1	Non-LTR Retrotransposon	L1	Non-LTR Retrotransposon	L1	Non-LTR Retrotransposon
L1MdF_III	462.8	-0.172378	0.180104	-0.957102	0.338516	0.513892	0.665743	NA	L1	Non-LTR Retrotransposon	L1	Non-LTR Retrotransposon	L1	Non-LTR Retrotransposon	L1	Non-LTR Retrotransposon
L1MdF_IV	610.182	-0.0540324	0.138474	-0.390198	0.69639	0.816234	0.203054	NA	L1	Non-LTR Retrotransposon	L1	Non-LTR Retrotransposon	L1	Non-LTR Retrotransposon	L1	Non-LTR Retrotransposon
L1MdF_V	275.034	0.748731	0.234155	3.19759	0.00138579	0.00851755	4.76563	NA	L1	Non-LTR Retrotransposon	L1	Non-LTR Retrotransposon	L1	Non-LTR Retrotransposon	L1	Non-LTR Retrotransposon
L1MdFanc_I	916.88	-0.053228	0.119208	-0.446513	0.655227	0.793189	0.231694	NA	L1	Non-LTR Retrotransposon	L1	Non-LTR Retrotransposon	L1	Non-LTR Retrotransposon	L1	Non-LTR Retrotransposon
L1MdFanc_II	565.458	-0.0289678	0.148493	-0.195079	0.845331	0.904088	0.100829	NA	L1	Non-LTR Retrotransposon	L1	Non-LTR Retrotransposon	L1	Non-LTR Retrotransposon	L1	Non-LTR Retrotransposon
L1MdGf_I	581.175	0.440968	0.148081	2.97788	0.00290252	0.0152382	4.18395	NA	L1	Non-LTR Retrotransposon	L1	Non-LTR Retrotransposon	L1	Non-LTR Retrotransposon	L1	Non-LTR Retrotransposon
L1MdGf_II	266.41	-0.090108	0.166859	-0.540025	0.58918	0.731395	0.312801	NA	L1	Non-LTR Retrotransposon	L1	Non-LTR Retrotransposon	L1	Non-LTR Retrotransposon	L1	Non-LTR Retrotransposon
L1MdMus_I	453.548	-0.369671	0.110747	-3.33797	0.000843934	0.00590753	5.13153	NA	L1	Non-LTR Retrotransposon	L1	Non-LTR Retrotransposon	L1	Non-LTR Retrotransposon	L1	Non-LTR Retrotransposon
L1MdMus_II	92.1099	-0.206285	0.198601	-1.03869	0.298948	0.468175	0.758913	NA	L1	Non-LTR Retrotransposon	L1	Non-LTR Retrotransposon	L1	Non-LTR Retrotransposon	L1	Non-LTR Retrotransposon
L1MdN_I	129.639	0.211247	0.213402	0.989903	0.322222	0.498158	0.696837	NA	L1	Non-LTR Retrotransposon	L1	Non-LTR Retrotransposon	L1	Non-LTR Retrotransposon	L1	Non-LTR Retrotransposon
L1MdTf_I	408.937	0.0832947	0.158403	0.525841	0.598999	0.736865	0.305351	NA	L1	Non-LTR Retrotransposon	L1	Non-LTR Retrotransposon	L1	Non-LTR Retrotransposon	L1	Non-LTR Retrotransposon
L1MdTf_II	631.058	0.0795949	0.137591	0.578488	0.562935	0.709298	0.343479	NA	L1	Non-LTR Retrotransposon	L1	Non-LTR Retrotransposon	L1	Non-LTR Retrotransposon	L1	Non-LTR Retrotransposon
L1MdTf_III	631.09	-0.000209774	0.159636	-0.00131407	0.998952	0.998952	0.00104903	NA	L1	Non-LTR Retrotransposon	L1	Non-LTR Retrotransposon	L1	Non-LTR Retrotransposon	L1	Non-LTR Retrotransposon
L1MdV_I	562.599	-0.329571	0.149283	-2.20769	0.027266	0.0869751	2.44213	NA	L1	Non-LTR Retrotransposon	L1	Non-LTR Retrotransposon	L1	Non-LTR Retrotransposon	L1	Non-LTR Retrotransposon
L1MdV_II	123.227	-0.482159	0.227648	-2.11801	0.0341746	0.100976	2.29287	NA	L1	Non-LTR Retrotransposon	L1	Non-LTR Retrotransposon	L1	Non-LTR Retrotransposon	L1	Non-LTR Retrotransposon
L1MdV_III	1123.53	0.693181	0.192283	3.60501	0.000312144	0.0030254	5.80071	NA	L1	Non-LTR Retrotransposon	L1	Non-LTR Retrotransposon	L1	Non-LTR Retrotransposon	L1	Non-LTR Retrotransposon
L1MM_F	7.21978	-1.74211	0.840971	-2.07154	0.0383084	0.108469	2.22129	NA	L1	Non-LTR Retrotransposon	L1	Non-LTR Retrotransposon	L1	Non-LTR Retrotransposon	L1	Non-LTR Retrotransposon
L1VL1_5	5.74197	-0.997675	0.905483	-1.10182	0.270542	0.443188	0.813761	NA	L1	Non-LTR Retrotransposon	L1	Non-LTR Retrotransposon	L1	Non-LTR Retrotransposon	L1	Non-LTR Retrotransposon
L1VL2_5	22.6535	-0.0401883	0.352578	-0.113984	0.90925	0.935324	0.0668623	NA	L1	Non-LTR Retrotransposon	L1	Non-LTR Retrotransposon	L1	Non-LTR Retrotransposon	L1	Non-LTR Retrotransposon
LTRIS_Mus	345.952	0.422733	0.13392	3.15661	0.00159614	0.00957682	4.64841	NA	ERV1	Endogenous Retrovirus	ERV1	Endogenous Retrovirus	ERV1	Endogenous Retrovirus	ERV1	Endogenous Retrovirus
LTRIS2	42.8416	-0.435299	0.28173	-1.54509	0.122324	0.254757	1.36745	NA	ERV1	Endogenous Retrovirus	ERV1	Endogenous Retrovirus	ERV1	Endogenous Retrovirus	ERV1	Endogenous Retrovirus
LTRIS3	308.304	0.101852	0.210634	0.48355	0.628705	0.769096	0.26254	NA	ERV1	Endogenous Retrovirus	ERV1	Endogenous Retrovirus	ERV1	Endogenous Retrovirus	ERV1	Endogenous Retrovirus
LTRIS4	10.6231	-1.30103	0.667535	-1.94901	0.0512942	0.134647	2.0051	NA	ERV1	Endogenous Retrovirus	ERV1	Endogenous Retrovirus	ERV1	Endogenous Retrovirus	ERV1	Endogenous Retrovirus
LTRIS4A	10.322	-1.4334	0.600594	-2.38663	0.0170036	0.0620999	2.77901	NA	ERV1	Endogenous Retrovirus	ERV1	Endogenous Retrovirus	ERV1	Endogenous Retrovirus	ERV1	Endogenous Retrovirus
LTRIS4B	2.39999	0.477841	1.12263	0.425646	0.670366	0.793189	0.231694	NA	ERV1	Endogenous Retrovirus	ERV1	Endogenous Retrovirus	ERV1	Endogenous Retrovirus	ERV1	Endogenous Retrovirus
LTRIS5	1.89819	0.187783	1.05362	0.178226	0.858545	0.909048	0.0953572	NA	ERV1	Endogenous Retrovirus	ERV1	Endogenous Retrovirus	ERV1	Endogenous Retrovirus	ERV1	Endogenous Retrovirus
LTRIS6	1.46955	0.419838	1.28705	0.326202	0.744271	NA	NA	NA	ERV1	Endogenous Retrovirus	ERV1	Endogenous Retrovirus	ERV1	Endogenous Retrovirus	ERV1	Endogenous Retrovirus
LX10	1.88942	-3.39021	1.61406	-2.10042	0.0356919	0.102209	2.28074	NA	L1	Non-LTR Retrotransposon	L1	Non-LTR Retrotransposon	L1	Non-LTR Retrotransposon	L1	Non-LTR Retrotransposon
LX2B	220.701	0.179482	0.162693	1.10319	0.269943	0.443188	0.813761	NA	L1	Non-LTR Retrotransposon	L1	Non-LTR Retrotransposon	L1	Non-LTR Retrotransposon	L1	Non-LTR Retrotransposon
LX4	84.5945	-1.25683	0.243277	-5.16624	2.38853e-07	4.29935e-06	12.357	LX4	L1	Non-LTR Retrotransposon	L1	Non-LTR Retrotransposon	L1	Non-LTR Retrotransposon	L1	Non-LTR Retrotransposon
LX5	44.7958	0.858169	0.387026	2.21734	0.0265996	0.0859373	2.45414	NA	L1	Non-LTR Retrotransposon	L1	Non-LTR Retrotransposon	L1	Non-LTR Retrotransposon	L1	Non-LTR Retrotransposon
LX5b	76.4558	-0.174118	0.212306	-0.820125	0.412145	0.580445	0.54396	NA	L1	Non-LTR Retrotransposon	L1	Non-LTR Retrotransposon	L1	Non-LTR Retrotransposon	L1	Non-LTR Retrotransposon
LX5c	11.8104	-1.27496	0.560671	-2.27399	0.0229664	0.0761517	2.57503	NA	L1	Non-LTR Retrotransposon	L1	Non-LTR Retrotransposon	L1	Non-LTR Retrotransposon	L1	Non-LTR Retrotransposon
LX6	2.56609	-0.439714	1.25005	-0.351756	0.725021	0.828979	0.18756	NA	L1	Non-LTR Retrotransposon	L1	Non-LTR Retrotransposon	L1	Non-LTR Retrotransposon	L1	Non-LTR Retrotransposon
LX7	13.6726	-1.38121	0.555214	-2.48772	0.0128566	0.049089	3.01412	NA	L1	Non-LTR Retrotransposon	L1	Non-LTR Retrotransposon	L1	Non-LTR Retrotransposon	L1	Non-LTR Retrotransposon
LX8	1.03273	-1.28011	1.84847	-0.692524	0.488608	NA	NA	NA	L1	Non-LTR Retrotransposon	L1	Non-LTR Retrotransposon	L1	Non-LTR Retrotransposon	L1	Non-LTR Retrotransposon
LX8B	0.838928	0.430879	1.98102	0.217503	0.827816	NA	NA	NA	L1	Non-LTR Retrotransposon	L1	Non-LTR Retrotransposon	L1	Non-LTR Retrotransposon	L1	Non-LTR Retrotransposon
LX9	19.6382	-0.346093	0.425443	-0.813487	0.415939	0.582314	0.540745	NA	L1	Non-LTR Retrotransposon	L1	Non-LTR Retrotransposon	L1	Non-LTR Retrotransposon	L1	Non-LTR Retrotransposon
MERV1_I	9.28214	-1.21276	0.650776	-1.86355	0.0623844	0.158797	1.84013	NA	ERV1	Endogenous Retrovirus	ERV1	Endogenous Retrovirus	ERV1	Endogenous Retrovirus	ERV1	Endogenous Retrovirus
MERV1_LTR	4.94592	-0.316517	0.842775	-0.375565	0.707241	0.817544	0.20145	NA	ERV1	Endogenous Retrovirus	ERV1	Endogenous Retrovirus	ERV1	Endogenous Retrovirus	ERV1	Endogenous Retrovirus
MERVL	1961.64	0.701382	0.135499	5.17628	2.26355e-07	4.29935e-06	12.357	MERVL	ERV3	Endogenous Retrovirus	ERV3	Endogenous Retrovirus	ERV3	Endogenous Retrovirus	ERV3	Endogenous Retrovirus
MLTR18_MM	0.141024	0.318444	4.40746	0.0722512	0.942402	NA	NA	NA	ERV2	Endogenous Retrovirus	ERV2	Endogenous Retrovirus	ERV2	Endogenous Retrovirus	ERV2	Endogenous Retrovirus
MLTR18A_MM	3.79298	-0.832827	0.962846	-0.864964	0.387058	0.557364	0.584537	NA	ERV2	Endogenous Retrovirus	ERV2	Endogenous Retrovirus	ERV2	Endogenous Retrovirus	ERV2	Endogenous Retrovirus
MLTR18B_MM	0.874049	0.0317582	1.55603	0.0204097	0.983717	NA	NA	NA	ERV2	Endogenous Retrovirus	ERV2	Endogenous Retrovirus	ERV2	Endogenous Retrovirus	ERV2	Endogenous Retrovirus
MLTR18C_MM	1.40279	1.27368	1.86093	0.684431	0.493703	NA	NA	NA	ERV2	Endogenous Retrovirus	ERV2	Endogenous Retrovirus	ERV2	Endogenous Retrovirus	ERV2	Endogenous Retrovirus
MLTR18D_MM	2.51267	0.0638441	1.21681	0.0524685	0.958155	0.973397	0.0269632	NA	ERV2	Endogenous Retrovirus	ERV2	Endogenous Retrovirus	ERV2	Endogenous Retrovirus	ERV2	Endogenous Retrovirus
MLTR25A	11.9422	-0.489645	0.50467	-0.970227	0.331933	0.506952	0.679338	NA	ERV2	Endogenous Retrovirus	ERV2	Endogenous Retrovirus	ERV2	Endogenous Retrovirus	ERV2	Endogenous Retrovirus
MLTR25B	11.5016	0.0271825	0.522629	0.052011	0.95852	0.973397	0.0269632	NA	ERV2	Endogenous Retrovirus	ERV2	Endogenous Retrovirus	ERV2	Endogenous Retrovirus	ERV2	Endogenous Retrovirus
MLTR25C	1.73444	-1.60226	1.5431	-1.03834	0.299112	0.468175	0.758913	NA	ERV2	Endogenous Retrovirus	ERV2	Endogenous Retrovirus	ERV2	Endogenous Retrovirus	ERV2	Endogenous Retrovirus
MLTR31A_MM	6.33995	-1.06025	0.750785	-1.41219	0.157893	0.303732	1.19161	NA	ERV2	Endogenous Retrovirus	ERV2	Endogenous Retrovirus	ERV2	Endogenous Retrovirus	ERV2	Endogenous Retrovirus
MLTR31B_MM	5.48597	-0.0194672	0.830729	-0.0234339	0.981304	0.985214	0.0148966	NA	ERV2	Endogenous Retrovirus	ERV2	Endogenous Retrovirus	ERV2	Endogenous Retrovirus	ERV2	Endogenous Retrovirus
MLTR31C_MM	1.11415	-2.59157	1.77009	-1.46409	0.143168	NA	NA	NA	ERV2	Endogenous Retrovirus	ERV2	Endogenous Retrovirus	ERV2	Endogenous Retrovirus	ERV2	Endogenous Retrovirus
MLTR31D_MM	34.4491	0.56929	0.29295	1.9433	0.0519798	0.13504	2.00218	NA	ERV2	Endogenous Retrovirus	ERV2	Endogenous Retrovirus	ERV2	Endogenous Retrovirus	ERV2	Endogenous Retrovirus
MLTR31E_MM	4.63815	-4.31015	1.32438	-3.25447	0.00113604	0.00734057	4.91434	NA	ERV2	Endogenous Retrovirus	ERV2	Endogenous Retrovirus	ERV2	Endogenous Retrovirus	ERV2	Endogenous Retrovirus
MLTR31F_MM	3.24179	-2.11302	1.22363	-1.72684	0.0841963	0.206825	1.57588	NA	ERV2	Endogenous Retrovirus	ERV2	Endogenous Retrovirus	ERV2	Endogenous Retrovirus	ERV2	Endogenous Retrovirus
MLTR31FA_MM	20.3578	0.493214	0.384444	1.28293	0.199518	0.359132	1.02406	NA	ERV2	Endogenous Retrovirus	ERV2	Endogenous Retrovirus	ERV2	Endogenous Retrovirus	ERV2	Endogenous Retrovirus
MLTR32C_MM	0.0677316	0.291311	4.40746	0.0660949	0.947302	NA	NA	NA	ERV2	Endogenous Retrovirus	ERV2	Endogenous Retrovirus	ERV2	Endogenous Retrovirus	ERV2	Endogenous Retrovirus
MMERVK10C	796.638	1.96516	0.165573	11.8689	1.71755e-32	2.16412e-30	68.3055	MMERVK10C	ERV2	Endogenous Retrovirus	ERV2	Endogenous Retrovirus	ERV2	Endogenous Retrovirus	ERV2	Endogenous Retrovirus
MMERVK10D3_I	167.451	2.06309	0.183238	11.2591	2.0886e-29	1.75442e-27	61.6077	MMERVK10D3_I	ERV2	Endogenous Retrovirus	ERV2	Endogenous Retrovirus	ERV2	Endogenous Retrovirus	ERV2	Endogenous Retrovirus
MMERVK10D3_LTR	29.4693	2.13086	0.317177	6.71822	1.83963e-11	4.63586e-10	21.492	MMERVK10D3_LTR	ERV2	Endogenous Retrovirus	ERV2	Endogenous Retrovirus	ERV2	Endogenous Retrovirus	ERV2	Endogenous Retrovirus
MMERVK9C_I	48.2263	-0.213968	0.30282	-0.706586	0.479824	0.646607	0.436016	NA	ERV2	Endogenous Retrovirus	ERV2	Endogenous Retrovirus	ERV2	Endogenous Retrovirus	ERV2	Endogenous Retrovirus
MMERVK9E_I	83.9136	-1.25049	0.231107	-5.41087	6.27198e-08	1.31712e-06	13.5401	MMERVK9E_I	ERV2	Endogenous Retrovirus	ERV2	Endogenous Retrovirus	ERV2	Endogenous Retrovirus	ERV2	Endogenous Retrovirus
MURVY_LTR	63.5744	-0.604895	0.250082	-2.41878	0.0155726	0.0577103	2.85232	NA	ERV1	Endogenous Retrovirus	ERV1	Endogenous Retrovirus	ERV1	Endogenous Retrovirus	ERV1	Endogenous Retrovirus
MYSERV	18.3802	-0.734864	0.435952	-1.68566	0.0918622	0.21585	1.53317	NA	ERV2	Endogenous Retrovirus	ERV2	Endogenous Retrovirus	ERV2	Endogenous Retrovirus	ERV2	Endogenous Retrovirus
MYSERV16_I	8.70768	-0.204144	0.602604	-0.33877	0.734783	0.828979	0.18756	NA	ERV2	Endogenous Retrovirus	ERV2	Endogenous Retrovirus	ERV2	Endogenous Retrovirus	ERV2	Endogenous Retrovirus
ORR1A0	1599.61	-0.297326	0.0882828	-3.36788	0.000757488	0.00561433	5.18243	NA	ERV3	Endogenous Retrovirus	ERV3	Endogenous Retrovirus	ERV3	Endogenous Retrovirus	ERV3	Endogenous Retrovirus
ORR1B1	575.793	-0.13267	0.0994559	-1.33396	0.182218	0.334696	1.09453	NA	ERV3	Endogenous Retrovirus	ERV3	Endogenous Retrovirus	ERV3	Endogenous Retrovirus	ERV3	Endogenous Retrovirus
ORR1B2	72.3834	-0.347418	0.332197	-1.04582	0.295644	0.468175	0.758913	NA	ERV3	Endogenous Retrovirus	ERV3	Endogenous Retrovirus	ERV3	Endogenous Retrovirus	ERV3	Endogenous Retrovirus
ORR1C1	22.204	-0.33804	0.393906	-0.858174	0.390797	0.55955	0.580623	NA	ERV3	Endogenous Retrovirus	ERV3	Endogenous Retrovirus	ERV3	Endogenous Retrovirus	ERV3	Endogenous Retrovirus
ORR1C2	30.6098	0.225726	0.343076	0.657947	0.510572	0.670126	0.40029	NA	ERV3	Endogenous Retrovirus	ERV3	Endogenous Retrovirus	ERV3	Endogenous Retrovirus	ERV3	Endogenous Retrovirus
RLTR10B2	65.5116	0.35571	0.26731	1.33071	0.183286	0.334696	1.09453	NA	ERV2	Endogenous Retrovirus	ERV2	Endogenous Retrovirus	ERV2	Endogenous Retrovirus	ERV2	Endogenous Retrovirus
RLTR10D2	12.0659	1.41456	0.693243	2.0405	0.0413007	0.113128	2.17924	NA	ERV2	Endogenous Retrovirus	ERV2	Endogenous Retrovirus	ERV2	Endogenous Retrovirus	ERV2	Endogenous Retrovirus
RLTR10E	56.0859	1.61025	0.325477	4.94734	7.52341e-07	1.18494e-05	11.3432	NA	ERV2	Endogenous Retrovirus	ERV2	Endogenous Retrovirus	ERV2	Endogenous Retrovirus	ERV2	Endogenous Retrovirus
RLTR10F	48.2318	1.51322	0.214311	7.06089	1.65443e-12	4.63241e-11	23.7954	RLTR10F	ERV2	Endogenous Retrovirus	ERV2	Endogenous Retrovirus	ERV2	Endogenous Retrovirus	ERV2	Endogenous Retrovirus
RLTR11A	410.042	-1.99729	0.200661	-9.95358	2.43266e-23	1.02172e-21	48.3328	RLTR11A	ERV2	Endogenous Retrovirus	ERV2	Endogenous Retrovirus	ERV2	Endogenous Retrovirus	ERV2	Endogenous Retrovirus
RLTR11B	186.418	-0.135488	0.429973	-0.315107	0.75268	0.843002	0.170786	NA	ERV2	Endogenous Retrovirus	ERV2	Endogenous Retrovirus	ERV2	Endogenous Retrovirus	ERV2	Endogenous Retrovirus
RLTR11C_MM	6.51489	-1.17522	0.804886	-1.46011	0.14426	0.281809	1.26652	NA	ERV2	Endogenous Retrovirus	ERV2	Endogenous Retrovirus	ERV2	Endogenous Retrovirus	ERV2	Endogenous Retrovirus
RLTR12A	8.96965	-1.03845	0.667726	-1.5552	0.119899	0.251941	1.37856	NA	ERV2	Endogenous Retrovirus	ERV2	Endogenous Retrovirus	ERV2	Endogenous Retrovirus	ERV2	Endogenous Retrovirus
RLTR12B	3.44999	-1.55032	1.05786	-1.46553	0.142777	0.281809	1.26652	NA	ERV2	Endogenous Retrovirus	ERV2	Endogenous Retrovirus	ERV2	Endogenous Retrovirus	ERV2	Endogenous Retrovirus
RLTR12B2	1.63608	-1.75147	1.49459	-1.17187	0.241248	NA	NA	NA	ERV2	Endogenous Retrovirus	ERV2	Endogenous Retrovirus	ERV2	Endogenous Retrovirus	ERV2	Endogenous Retrovirus
RLTR12C	0.0677316	0.291311	4.40746	0.0660949	0.947302	NA	NA	NA	ERV2	Endogenous Retrovirus	ERV2	Endogenous Retrovirus	ERV2	Endogenous Retrovirus	ERV2	Endogenous Retrovirus
RLTR12D	0.735806	1.52137	2.02169	0.752524	0.451736	NA	NA	NA	ERV2	Endogenous Retrovirus	ERV2	Endogenous Retrovirus	ERV2	Endogenous Retrovirus	ERV2	Endogenous Retrovirus
RLTR12E	2.36822	-2.35035	1.36256	-1.72495	0.0845356	0.206825	1.57588	NA	ERV2	Endogenous Retrovirus	ERV2	Endogenous Retrovirus	ERV2	Endogenous Retrovirus	ERV2	Endogenous Retrovirus
RLTR12F	0.0632053	1.2531	4.40746	0.284313	0.776171	NA	NA	NA	ERV2	Endogenous Retrovirus	ERV2	Endogenous Retrovirus	ERV2	Endogenous Retrovirus	ERV2	Endogenous Retrovirus
RLTR12G	0.246791	0.339478	3.92719	0.086443	0.931114	NA	NA	NA	ERV2	Endogenous Retrovirus	ERV2	Endogenous Retrovirus	ERV2	Endogenous Retrovirus	ERV2	Endogenous Retrovirus
RLTR12H	1.33457	0.258776	1.32568	0.195203	0.845234	NA	NA	NA	ERV2	Endogenous Retrovirus	ERV2	Endogenous Retrovirus	ERV2	Endogenous Retrovirus	ERV2	Endogenous Retrovirus
RLTR13A	11.7849	-0.377462	0.645699	-0.584578	0.558831	0.707666	0.345783	NA	ERV2	Endogenous Retrovirus	ERV2	Endogenous Retrovirus	ERV2	Endogenous Retrovirus	ERV2	Endogenous Retrovirus
RLTR13A1	14.6235	0.185167	0.42021	0.440654	0.659464	0.793189	0.231694	NA	ERV2	Endogenous Retrovirus	ERV2	Endogenous Retrovirus	ERV2	Endogenous Retrovirus	ERV2	Endogenous Retrovirus
RLTR13A2	22.3583	-1.5624	0.437751	-3.56915	0.000358138	0.00334262	5.701	NA	ERV2	Endogenous Retrovirus	ERV2	Endogenous Retrovirus	ERV2	Endogenous Retrovirus	ERV2	Endogenous Retrovirus
RLTR13A3	22.31	-0.571982	0.374125	-1.52885	0.126301	0.25933	1.34966	NA	ERV2	Endogenous Retrovirus	ERV2	Endogenous Retrovirus	ERV2	Endogenous Retrovirus	ERV2	Endogenous Retrovirus
RLTR13B1	74.5543	-0.840958	0.271427	-3.09829	0.00194643	0.011407	4.47353	NA	ERV2	Endogenous Retrovirus	ERV2	Endogenous Retrovirus	ERV2	Endogenous Retrovirus	ERV2	Endogenous Retrovirus
RLTR13B2	22.3877	0.246816	0.330002	0.747923	0.454507	0.619112	0.479469	NA	ERV2	Endogenous Retrovirus	ERV2	Endogenous Retrovirus	ERV2	Endogenous Retrovirus	ERV2	Endogenous Retrovirus
RLTR13B3	28.2183	-1.3639	0.51374	-2.65485	0.00793442	0.0363541	3.31445	NA	ERV2	Endogenous Retrovirus	ERV2	Endogenous Retrovirus	ERV2	Endogenous Retrovirus	ERV2	Endogenous Retrovirus
RLTR13B4	36.1918	-0.108566	0.276643	-0.392442	0.694731	0.816234	0.203054	NA	ERV2	Endogenous Retrovirus	ERV2	Endogenous Retrovirus	ERV2	Endogenous Retrovirus	ERV2	Endogenous Retrovirus
RLTR13C1	20.95	-0.342064	0.36296	-0.942429	0.345973	0.522067	0.649958	NA	ERV2	Endogenous Retrovirus	ERV2	Endogenous Retrovirus	ERV2	Endogenous Retrovirus	ERV2	Endogenous Retrovirus
RLTR13C2	34.0183	-0.51708	0.309521	-1.67058	0.0948046	0.217189	1.52699	NA	ERV2	Endogenous Retrovirus	ERV2	Endogenous Retrovirus	ERV2	Endogenous Retrovirus	ERV2	Endogenous Retrovirus
RLTR13C3	29.3738	-1.78806	0.506046	-3.53339	0.000410272	0.00369245	5.60147	NA	ERV2	Endogenous Retrovirus	ERV2	Endogenous Retrovirus	ERV2	Endogenous Retrovirus	ERV2	Endogenous Retrovirus
RLTR13D1	7.80395	-1.45968	0.683439	-2.13579	0.0326962	0.0992704	2.30991	NA	ERV2	Endogenous Retrovirus	ERV2	Endogenous Retrovirus	ERV2	Endogenous Retrovirus	ERV2	Endogenous Retrovirus
RLTR13D2	48.2578	0.570241	0.361113	1.57912	0.114309	0.250486	1.38435	NA	ERV2	Endogenous Retrovirus	ERV2	Endogenous Retrovirus	ERV2	Endogenous Retrovirus	ERV2	Endogenous Retrovirus
RLTR13D3	32.1469	0.967106	0.36068	2.68134	0.00733279	0.0342197	3.37495	NA	ERV2	Endogenous Retrovirus	ERV2	Endogenous Retrovirus	ERV2	Endogenous Retrovirus	ERV2	Endogenous Retrovirus
RLTR13D3A	8.51104	-1.57453	0.673109	-2.33919	0.0193258	0.0667138	2.70734	NA	ERV2	Endogenous Retrovirus	ERV2	Endogenous Retrovirus	ERV2	Endogenous Retrovirus	ERV2	Endogenous Retrovirus
RLTR13D3A1	107.954	-0.469945	0.229155	-2.05077	0.040289	0.112809	2.18206	NA	ERV2	Endogenous Retrovirus	ERV2	Endogenous Retrovirus	ERV2	Endogenous Retrovirus	ERV2	Endogenous Retrovirus
RLTR13D4	9.61011	0.138346	0.578108	0.239309	0.810866	0.880769	0.12696	NA	ERV2	Endogenous Retrovirus	ERV2	Endogenous Retrovirus	ERV2	Endogenous Retrovirus	ERV2	Endogenous Retrovirus
RLTR13D5	19.1998	-0.122727	0.356354	-0.344398	0.730547	0.828979	0.18756	NA	ERV2	Endogenous Retrovirus	ERV2	Endogenous Retrovirus	ERV2	Endogenous Retrovirus	ERV2	Endogenous Retrovirus
RLTR13D6	11.7729	0.171643	0.589188	0.291321	0.770806	0.859483	0.151424	NA	ERV2	Endogenous Retrovirus	ERV2	Endogenous Retrovirus	ERV2	Endogenous Retrovirus	ERV2	Endogenous Retrovirus
RLTR13E	31.7802	-1.27371	0.349321	-3.64626	0.000266083	0.00268212	5.92115	NA	ERV2	Endogenous Retrovirus	ERV2	Endogenous Retrovirus	ERV2	Endogenous Retrovirus	ERV2	Endogenous Retrovirus
RLTR13F	11.1288	-0.856019	0.505677	-1.69282	0.0904903	0.21585	1.53317	NA	ERV2	Endogenous Retrovirus	ERV2	Endogenous Retrovirus	ERV2	Endogenous Retrovirus	ERV2	Endogenous Retrovirus
RLTR13G	16.0192	-0.926433	0.438538	-2.11255	0.0346395	0.100976	2.29287	NA	ERV2	Endogenous Retrovirus	ERV2	Endogenous Retrovirus	ERV2	Endogenous Retrovirus	ERV2	Endogenous Retrovirus
RLTR14	23.0684	0.453859	0.405404	1.11952	0.262917	0.443188	0.813761	NA	ERV1	Endogenous Retrovirus	ERV1	Endogenous Retrovirus	ERV1	Endogenous Retrovirus	ERV1	Endogenous Retrovirus
RLTR16	16.9319	-0.628051	0.59082	-1.06302	0.287775	0.460353	0.775761	NA	ERV2	Endogenous Retrovirus	ERV2	Endogenous Retrovirus	ERV2	Endogenous Retrovirus	ERV2	Endogenous Retrovirus
RLTR16B_MM	49.7266	0.414423	0.246765	1.67943	0.093069	0.21585	1.53317	NA	ERV2	Endogenous Retrovirus	ERV2	Endogenous Retrovirus	ERV2	Endogenous Retrovirus	ERV2	Endogenous Retrovirus
RLTR16C_MM	0.690313	-1.25036	1.89757	-0.658925	0.509944	NA	NA	NA	ERV2	Endogenous Retrovirus	ERV2	Endogenous Retrovirus	ERV2	Endogenous Retrovirus	ERV2	Endogenous Retrovirus
RLTR17_MM	140.798	-0.13048	0.201039	-0.649029	0.51632	0.674158	0.39429	NA	ERV2	Endogenous Retrovirus	ERV2	Endogenous Retrovirus	ERV2	Endogenous Retrovirus	ERV2	Endogenous Retrovirus
RLTR17B_Mm	1.62594	-2.18786	1.58072	-1.38408	0.166333	NA	NA	NA	ERV2	Endogenous Retrovirus	ERV2	Endogenous Retrovirus	ERV2	Endogenous Retrovirus	ERV2	Endogenous Retrovirus
RLTR17C_Mm	1.39139	-0.5572	1.60831	-0.346452	0.729003	NA	NA	NA	ERV2	Endogenous Retrovirus	ERV2	Endogenous Retrovirus	ERV2	Endogenous Retrovirus	ERV2	Endogenous Retrovirus
RLTR17D_Mm	5.21704	-0.514731	0.696693	-0.73882	0.460016	0.623248	0.472811	NA	ERV2	Endogenous Retrovirus	ERV2	Endogenous Retrovirus	ERV2	Endogenous Retrovirus	ERV2	Endogenous Retrovirus
RLTR18_MM	2.9868	-0.412839	0.948205	-0.435391	0.663279	0.793189	0.231694	NA	ERV2	Endogenous Retrovirus	ERV2	Endogenous Retrovirus	ERV2	Endogenous Retrovirus	ERV2	Endogenous Retrovirus
RLTR19A_MM	3.28302	-2.8842	1.31295	-2.19673	0.0280398	0.0883252	2.42673	NA	ERV3	Endogenous Retrovirus	ERV3	Endogenous Retrovirus	ERV3	Endogenous Retrovirus	ERV3	Endogenous Retrovirus
RLTR19A2	0.636718	-1.28424	1.89966	-0.676036	0.499018	NA	NA	NA	ERV3	Endogenous Retrovirus	ERV3	Endogenous Retrovirus	ERV3	Endogenous Retrovirus	ERV3	Endogenous Retrovirus
RLTR19B_MM	7.70854	-0.754158	0.689163	-1.09431	0.273819	0.445177	0.809284	NA	ERV3	Endogenous Retrovirus	ERV3	Endogenous Retrovirus	ERV3	Endogenous Retrovirus	ERV3	Endogenous Retrovirus
RLTR19C_MM	30.959	-1.28976	0.401407	-3.21309	0.00131314	0.00827279	4.79478	NA	ERV3	Endogenous Retrovirus	ERV3	Endogenous Retrovirus	ERV3	Endogenous Retrovirus	ERV3	Endogenous Retrovirus
RLTR19D	0	NA	NA	NA	NA	NA	NA	NA	ERV3	Endogenous Retrovirus	ERV3	Endogenous Retrovirus	ERV3	Endogenous Retrovirus	ERV3	Endogenous Retrovirus
RLTR1A2_MM	13.3194	0.460203	0.526007	0.874899	0.381629	0.555899	0.587169	NA	ERV1	Endogenous Retrovirus	ERV1	Endogenous Retrovirus	ERV1	Endogenous Retrovirus	ERV1	Endogenous Retrovirus
RLTR1B_MM	2549.75	-0.687966	0.122636	-5.6098	2.02556e-08	4.64038e-07	14.5833	RLTR1B_MM	ERV1	Endogenous Retrovirus	ERV1	Endogenous Retrovirus	ERV1	Endogenous Retrovirus	ERV1	Endogenous Retrovirus
RLTR1C_MM	39.9474	0.0618259	0.274764	0.225015	0.821968	0.888995	0.117663	NA	ERV1	Endogenous Retrovirus	ERV1	Endogenous Retrovirus	ERV1	Endogenous Retrovirus	ERV1	Endogenous Retrovirus
RLTR1D_MM	17.8706	-2.06092	0.61177	-3.36878	0.000755012	0.00561433	5.18243	NA	ERV1	Endogenous Retrovirus	ERV1	Endogenous Retrovirus	ERV1	Endogenous Retrovirus	ERV1	Endogenous Retrovirus
RLTR1D2_MM	13.4798	-0.302411	0.437053	-0.691931	0.488981	0.655442	0.422445	NA	ERV1	Endogenous Retrovirus	ERV1	Endogenous Retrovirus	ERV1	Endogenous Retrovirus	ERV1	Endogenous Retrovirus
RLTR1E_MM	0.922357	-1.47393	1.73226	-0.850872	0.394841	NA	NA	NA	ERV1	Endogenous Retrovirus	ERV1	Endogenous Retrovirus	ERV1	Endogenous Retrovirus	ERV1	Endogenous Retrovirus
RLTR1F_Mm	3.75643	0.912258	0.996143	0.91579	0.359777	0.536472	0.622741	NA	ERV1	Endogenous Retrovirus	ERV1	Endogenous Retrovirus	ERV1	Endogenous Retrovirus	ERV1	Endogenous Retrovirus
RLTR20A1_MM	1.64225	-2.09422	1.47407	-1.4207	0.155403	NA	NA	NA	ERV2	Endogenous Retrovirus	ERV2	Endogenous Retrovirus	ERV2	Endogenous Retrovirus	ERV2	Endogenous Retrovirus
RLTR20A2_MM	20.9908	1.30465	0.324533	4.02009	5.81761e-05	0.000733019	7.21834	NA	ERV2	Endogenous Retrovirus	ERV2	Endogenous Retrovirus	ERV2	Endogenous Retrovirus	ERV2	Endogenous Retrovirus
RLTR20A2B_MM	2.20621	-1.79859	1.431	-1.25688	0.208798	0.37317	0.985721	NA	ERV2	Endogenous Retrovirus	ERV2	Endogenous Retrovirus	ERV2	Endogenous Retrovirus	ERV2	Endogenous Retrovirus
RLTR20A3_MM	9.5746	-0.588095	0.629983	-0.933509	0.350557	0.525836	0.642766	NA	ERV2	Endogenous Retrovirus	ERV2	Endogenous Retrovirus	ERV2	Endogenous Retrovirus	ERV2	Endogenous Retrovirus
RLTR20B1_MM	0.753763	-1.73812	1.78303	-0.974809	0.329655	NA	NA	NA	ERV2	Endogenous Retrovirus	ERV2	Endogenous Retrovirus	ERV2	Endogenous Retrovirus	ERV2	Endogenous Retrovirus
RLTR20B2_MM	3.09031	-1.94574	1.23627	-1.57388	0.115516	0.250948	1.38251	NA	ERV2	Endogenous Retrovirus	ERV2	Endogenous Retrovirus	ERV2	Endogenous Retrovirus	ERV2	Endogenous Retrovirus
RLTR20B3A_MM	11.9576	0.246853	0.438105	0.563457	0.573123	0.718501	0.330589	NA	ERV2	Endogenous Retrovirus	ERV2	Endogenous Retrovirus	ERV2	Endogenous Retrovirus	ERV2	Endogenous Retrovirus
RLTR20B4_MM	1.30647	-2.14573	2.02938	-1.05733	0.290362	NA	NA	NA	ERV2	Endogenous Retrovirus	ERV2	Endogenous Retrovirus	ERV2	Endogenous Retrovirus	ERV2	Endogenous Retrovirus
RLTR20B5_MM	1.49604	0.722831	1.61731	0.446935	0.654922	NA	NA	NA	ERV2	Endogenous Retrovirus	ERV2	Endogenous Retrovirus	ERV2	Endogenous Retrovirus	ERV2	Endogenous Retrovirus
RLTR20C_MM	4.23857	-0.581752	0.864638	-0.672827	0.501058	0.66456	0.408629	NA	ERV2	Endogenous Retrovirus	ERV2	Endogenous Retrovirus	ERV2	Endogenous Retrovirus	ERV2	Endogenous Retrovirus
RLTR20C1_MM	22609.6	-0.407387	0.260855	-1.56173	0.118351	0.251941	1.37856	NA	ERV2	Endogenous Retrovirus	ERV2	Endogenous Retrovirus	ERV2	Endogenous Retrovirus	ERV2	Endogenous Retrovirus
RLTR20C2_MM	24.5512	0.0662474	0.506562	0.130779	0.895951	0.932973	0.0693787	NA	ERV2	Endogenous Retrovirus	ERV2	Endogenous Retrovirus	ERV2	Endogenous Retrovirus	ERV2	Endogenous Retrovirus
RLTR20D_MM	6.13436	0.094952	0.645052	0.1472	0.882974	0.923275	0.0798276	NA	ERV2	Endogenous Retrovirus	ERV2	Endogenous Retrovirus	ERV2	Endogenous Retrovirus	ERV2	Endogenous Retrovirus
RLTR23_MM	18540	0.344692	0.281804	1.22316	0.221267	0.392672	0.934781	NA	ERV2	Endogenous Retrovirus	ERV2	Endogenous Retrovirus	ERV2	Endogenous Retrovirus	ERV2	Endogenous Retrovirus
RLTR24_MM	3.88879	0.575634	0.861599	0.668099	0.50407	0.665056	0.407884	NA	ERV1	Endogenous Retrovirus	ERV1	Endogenous Retrovirus	ERV1	Endogenous Retrovirus	ERV1	Endogenous Retrovirus
RLTR24B_MM	1.56697	-0.081325	1.47165	-0.0552611	0.95593	NA	NA	NA	ERV1	Endogenous Retrovirus	ERV1	Endogenous Retrovirus	ERV1	Endogenous Retrovirus	ERV1	Endogenous Retrovirus
RLTR26B_MM	3.1178	0.964287	0.794359	1.21392	0.224779	0.396114	0.926053	NA	ERV2	Endogenous Retrovirus	ERV2	Endogenous Retrovirus	ERV2	Endogenous Retrovirus	ERV2	Endogenous Retrovirus
RLTR26C_MM	7.59696	0.958791	0.596267	1.60799	0.107838	0.238378	1.4339	NA	ERV2	Endogenous Retrovirus	ERV2	Endogenous Retrovirus	ERV2	Endogenous Retrovirus	ERV2	Endogenous Retrovirus
RLTR26D_MM	0.994452	-2.15141	1.67223	-1.28655	0.198251	NA	NA	NA	ERV2	Endogenous Retrovirus	ERV2	Endogenous Retrovirus	ERV2	Endogenous Retrovirus	ERV2	Endogenous Retrovirus
RLTR30_MM	8.14322	-0.100783	0.581352	-0.17336	0.862369	0.909276	0.0951068	NA	ERV1	Endogenous Retrovirus	ERV1	Endogenous Retrovirus	ERV1	Endogenous Retrovirus	ERV1	Endogenous Retrovirus
RLTR30B_MM	1.37532	-1.0368	1.84121	-0.563109	0.57336	NA	NA	NA	ERV1	Endogenous Retrovirus	ERV1	Endogenous Retrovirus	ERV1	Endogenous Retrovirus	ERV1	Endogenous Retrovirus
RLTR30C_MM	1.70865	-0.927417	1.57709	-0.588055	0.556496	NA	NA	NA	ERV1	Endogenous Retrovirus	ERV1	Endogenous Retrovirus	ERV1	Endogenous Retrovirus	ERV1	Endogenous Retrovirus
RLTR30D_MM	0.97824	-2.45444	1.75344	-1.39979	0.161576	NA	NA	NA	ERV1	Endogenous Retrovirus	ERV1	Endogenous Retrovirus	ERV1	Endogenous Retrovirus	ERV1	Endogenous Retrovirus
RLTR30D2_MM	4.43159	-1.27782	0.91436	-1.3975	0.162264	0.307652	1.17878	NA	ERV1	Endogenous Retrovirus	ERV1	Endogenous Retrovirus	ERV1	Endogenous Retrovirus	ERV1	Endogenous Retrovirus
RLTR30E_MM	2.73205	0.380029	1.10492	0.343944	0.730888	0.828979	0.18756	NA	ERV1	Endogenous Retrovirus	ERV1	Endogenous Retrovirus	ERV1	Endogenous Retrovirus	ERV1	Endogenous Retrovirus
RLTR31_MM	65.6072	0.926282	0.235186	3.93851	8.19906e-05	0.000943259	6.96617	NA	ERV2	Endogenous Retrovirus	ERV2	Endogenous Retrovirus	ERV2	Endogenous Retrovirus	ERV2	Endogenous Retrovirus
RLTR31B_MM	5026.75	0.123083	0.288228	0.427033	0.669355	0.793189	0.231694	NA	ERV2	Endogenous Retrovirus	ERV2	Endogenous Retrovirus	ERV2	Endogenous Retrovirus	ERV2	Endogenous Retrovirus
RLTR31C_MM	8.48777	-0.47208	0.590477	-0.79949	0.424006	0.590329	0.527075	NA	ERV2	Endogenous Retrovirus	ERV2	Endogenous Retrovirus	ERV2	Endogenous Retrovirus	ERV2	Endogenous Retrovirus
RLTR33_MM	20.1231	-0.674361	0.415304	-1.62377	0.104424	0.234954	1.44837	NA	ERV3	Endogenous Retrovirus	ERV3	Endogenous Retrovirus	ERV3	Endogenous Retrovirus	ERV3	Endogenous Retrovirus
RLTR34_MM	12438.5	0.455323	0.282538	1.61155	0.107061	0.238378	1.4339	NA	ERV2	Endogenous Retrovirus	ERV2	Endogenous Retrovirus	ERV2	Endogenous Retrovirus	ERV2	Endogenous Retrovirus
RLTR34B_MM	2.05365	2.37755	1.2263	1.93881	0.0525249	0.135064	2.00201	NA	ERV2	Endogenous Retrovirus	ERV2	Endogenous Retrovirus	ERV2	Endogenous Retrovirus	ERV2	Endogenous Retrovirus
RLTR34C_MM	2.97383	-0.643735	1.03485	-0.622056	0.533905	0.68645	0.376222	NA	ERV2	Endogenous Retrovirus	ERV2	Endogenous Retrovirus	ERV2	Endogenous Retrovirus	ERV2	Endogenous Retrovirus
RLTR34D_MM	0.692184	-0.467406	2.1534	-0.217055	0.828166	NA	NA	NA	ERV2	Endogenous Retrovirus	ERV2	Endogenous Retrovirus	ERV2	Endogenous Retrovirus	ERV2	Endogenous Retrovirus
RLTR35_MM	33.3996	-0.422155	0.322625	-1.3085	0.190704	0.345737	1.06208	NA	ERV3	Endogenous Retrovirus	ERV3	Endogenous Retrovirus	ERV3	Endogenous Retrovirus	ERV3	Endogenous Retrovirus
RLTR35B_MM	2.19505	-3.67901	1.45449	-2.52942	0.0114251	0.0464375	3.06965	NA	ERV3	Endogenous Retrovirus	ERV3	Endogenous Retrovirus	ERV3	Endogenous Retrovirus	ERV3	Endogenous Retrovirus
RLTR4_MM	1550.76	-0.00788354	0.172782	-0.0456271	0.963607	0.973397	0.0269632	NA	ERV1	Endogenous Retrovirus	ERV1	Endogenous Retrovirus	ERV1	Endogenous Retrovirus	ERV1	Endogenous Retrovirus
RLTR41A2	8.18591	-0.631384	0.727286	-0.868138	0.385319	0.557364	0.584537	NA	ERV1	Endogenous Retrovirus	ERV1	Endogenous Retrovirus	ERV1	Endogenous Retrovirus	ERV1	Endogenous Retrovirus
RLTR41B	1.74299	-0.140458	1.23352	-0.113868	0.909343	0.935324	0.0668623	NA	ERV1	Endogenous Retrovirus	ERV1	Endogenous Retrovirus	ERV1	Endogenous Retrovirus	ERV1	Endogenous Retrovirus
RLTR41C	0.208658	1.25481	4.40746	0.284702	0.775872	NA	NA	NA	ERV1	Endogenous Retrovirus	ERV1	Endogenous Retrovirus	ERV1	Endogenous Retrovirus	ERV1	Endogenous Retrovirus
RLTR43C	3.07747	-0.125665	1.002	-0.125415	0.900195	0.933536	0.0687758	NA	ERV2	Endogenous Retrovirus	ERV2	Endogenous Retrovirus	ERV2	Endogenous Retrovirus	ERV2	Endogenous Retrovirus
RLTR46A	0.0481679	1.2531	4.40746	0.284313	0.776171	NA	NA	NA	ERV2	Endogenous Retrovirus	ERV2	Endogenous Retrovirus	ERV2	Endogenous Retrovirus	ERV2	Endogenous Retrovirus
RLTR46A2	0.227525	1.2531	4.40746	0.284313	0.776171	NA	NA	NA	ERV2	Endogenous Retrovirus	ERV2	Endogenous Retrovirus	ERV2	Endogenous Retrovirus	ERV2	Endogenous Retrovirus
RLTR46B	92.3569	2.32657	0.241509	9.63348	5.77406e-22	2.07866e-20	45.32	RLTR46B	ERV2	Endogenous Retrovirus	ERV2	Endogenous Retrovirus	ERV2	Endogenous Retrovirus	ERV2	Endogenous Retrovirus
RLTR47	3.65128	-1.43182	0.937213	-1.52774	0.126578	0.25933	1.34966	NA	ERV2	Endogenous Retrovirus	ERV2	Endogenous Retrovirus	ERV2	Endogenous Retrovirus	ERV2	Endogenous Retrovirus
RLTR48A	39.4642	-0.858528	0.283666	-3.02654	0.00247369	0.0138527	4.27928	NA	ERV1	Endogenous Retrovirus	ERV1	Endogenous Retrovirus	ERV1	Endogenous Retrovirus	ERV1	Endogenous Retrovirus
RLTR48B	1.8162	-1.65798	1.44972	-1.14365	0.252767	0.430388	0.843069	NA	ERV1	Endogenous Retrovirus	ERV1	Endogenous Retrovirus	ERV1	Endogenous Retrovirus	ERV1	Endogenous Retrovirus
RLTR48C	11.7693	-0.337789	0.539653	-0.625937	0.531356	0.68645	0.376222	NA	ERV1	Endogenous Retrovirus	ERV1	Endogenous Retrovirus	ERV1	Endogenous Retrovirus	ERV1	Endogenous Retrovirus
RLTR49	11.4705	-1.458	0.71328	-2.04408	0.0409458	0.113128	2.17924	NA	ERV1	Endogenous Retrovirus	ERV1	Endogenous Retrovirus	ERV1	Endogenous Retrovirus	ERV1	Endogenous Retrovirus
RLTR4I_MM	16100.6	0.220007	0.220341	0.998485	0.318044	0.494735	0.703732	NA	ERV1	Endogenous Retrovirus	ERV1	Endogenous Retrovirus	ERV1	Endogenous Retrovirus	ERV1	Endogenous Retrovirus
RLTR5_MM	30.3891	-1.19532	0.397717	-3.00546	0.0026518	0.0145273	4.23173	NA	ERV1	Endogenous Retrovirus	ERV1	Endogenous Retrovirus	ERV1	Endogenous Retrovirus	ERV1	Endogenous Retrovirus
RLTR50A	0.140779	2.21489	4.40746	0.502531	0.615294	NA	NA	NA	ERV2	Endogenous Retrovirus	ERV2	Endogenous Retrovirus	ERV2	Endogenous Retrovirus	ERV2	Endogenous Retrovirus
RLTR50B	4.37615	-0.294487	0.77058	-0.382164	0.70234	0.817544	0.20145	NA	ERV2	Endogenous Retrovirus	ERV2	Endogenous Retrovirus	ERV2	Endogenous Retrovirus	ERV2	Endogenous Retrovirus
RLTR51A_Mm	5422.79	-0.0912204	0.335611	-0.271804	0.785773	0.86242	0.148013	NA	ERV3	Endogenous Retrovirus	ERV3	Endogenous Retrovirus	ERV3	Endogenous Retrovirus	ERV3	Endogenous Retrovirus
RLTR51B_Mm	4.26955	-0.720743	0.908808	-0.793065	0.42774	0.592255	0.523817	NA	ERV3	Endogenous Retrovirus	ERV3	Endogenous Retrovirus	ERV3	Endogenous Retrovirus	ERV3	Endogenous Retrovirus
RLTR53_Mm	4.71679	-2.28206	1.16574	-1.95761	0.0502757	0.133363	2.01468	NA	ERV3	Endogenous Retrovirus	ERV3	Endogenous Retrovirus	ERV3	Endogenous Retrovirus	ERV3	Endogenous Retrovirus
RLTR53B_Mm	0.397982	1.25311	2.8817	0.43485	0.663671	NA	NA	NA	ERV3	Endogenous Retrovirus	ERV3	Endogenous Retrovirus	ERV3	Endogenous Retrovirus	ERV3	Endogenous Retrovirus
RLTR6_MM	2654.44	2.06579	0.199388	10.3607	3.74244e-25	1.88619e-23	52.3249	RLTR6_MM	ERV1	Endogenous Retrovirus	ERV1	Endogenous Retrovirus	ERV1	Endogenous Retrovirus	ERV1	Endogenous Retrovirus
RLTR6B_Mm	47.4251	0.517616	0.261822	1.97698	0.0480438	0.128798	2.04951	NA	ERV1	Endogenous Retrovirus	ERV1	Endogenous Retrovirus	ERV1	Endogenous Retrovirus	ERV1	Endogenous Retrovirus
RLTR6C_Mm	904.209	2.05004	0.238423	8.59835	8.0868e-18	2.54734e-16	35.9063	RLTR6C_Mm	ERV1	Endogenous Retrovirus	ERV1	Endogenous Retrovirus	ERV1	Endogenous Retrovirus	ERV1	Endogenous Retrovirus
RLTR6I_MM	4917.99	3.18886	0.256482	12.4331	1.72901e-35	4.35711e-33	74.5135	RLTR6I_MM	ERV1	Endogenous Retrovirus	ERV1	Endogenous Retrovirus	ERV1	Endogenous Retrovirus	ERV1	Endogenous Retrovirus
RLTR8	19.4164	-0.0806394	0.417066	-0.193349	0.846686	0.904088	0.100829	NA	ERV2	Endogenous Retrovirus	ERV2	Endogenous Retrovirus	ERV2	Endogenous Retrovirus	ERV2	Endogenous Retrovirus
RLTR9A	0.997311	-1.65725	1.72822	-0.95893	0.337594	NA	NA	NA	ERV2	Endogenous Retrovirus	ERV2	Endogenous Retrovirus	ERV2	Endogenous Retrovirus	ERV2	Endogenous Retrovirus
RLTR9A2	1.68363	-1.97129	1.64498	-1.19837	0.230774	NA	NA	NA	ERV2	Endogenous Retrovirus	ERV2	Endogenous Retrovirus	ERV2	Endogenous Retrovirus	ERV2	Endogenous Retrovirus
RLTR9A3	3.53849	-0.513545	0.977779	-0.525215	0.599434	0.736865	0.305351	NA	ERV2	Endogenous Retrovirus	ERV2	Endogenous Retrovirus	ERV2	Endogenous Retrovirus	ERV2	Endogenous Retrovirus
RLTR9A3A	0.11951	0.350504	4.40609	0.0795499	0.936595	NA	NA	NA	ERV2	Endogenous Retrovirus	ERV2	Endogenous Retrovirus	ERV2	Endogenous Retrovirus	ERV2	Endogenous Retrovirus
RLTR9A3B	0.246218	-0.724478	3.22903	-0.224364	0.822474	NA	NA	NA	ERV2	Endogenous Retrovirus	ERV2	Endogenous Retrovirus	ERV2	Endogenous Retrovirus	ERV2	Endogenous Retrovirus
RLTR9A4	0.134756	2.21489	4.40746	0.502531	0.615294	NA	NA	NA	ERV2	Endogenous Retrovirus	ERV2	Endogenous Retrovirus	ERV2	Endogenous Retrovirus	ERV2	Endogenous Retrovirus
RLTR9B	5.99313	-3.05208	1.3013	-2.34541	0.0190062	0.0665218	2.71023	NA	ERV2	Endogenous Retrovirus	ERV2	Endogenous Retrovirus	ERV2	Endogenous Retrovirus	ERV2	Endogenous Retrovirus
RLTR9B2	5.18	1.11538	0.716509	1.55668	0.119547	0.251941	1.37856	NA	ERV2	Endogenous Retrovirus	ERV2	Endogenous Retrovirus	ERV2	Endogenous Retrovirus	ERV2	Endogenous Retrovirus
RLTR9D	39.9327	0.608153	0.29874	2.03573	0.0417777	0.113204	2.17856	NA	ERV2	Endogenous Retrovirus	ERV2	Endogenous Retrovirus	ERV2	Endogenous Retrovirus	ERV2	Endogenous Retrovirus
RLTR9D2	14.2407	-1.09791	0.601672	-1.82477	0.0680359	0.17145	1.76346	NA	ERV2	Endogenous Retrovirus	ERV2	Endogenous Retrovirus	ERV2	Endogenous Retrovirus	ERV2	Endogenous Retrovirus
RLTR9E	20.9252	-0.504535	0.43095	-1.17075	0.241698	0.420055	0.867369	NA	ERV2	Endogenous Retrovirus	ERV2	Endogenous Retrovirus	ERV2	Endogenous Retrovirus	ERV2	Endogenous Retrovirus
RLTR9F	10.0602	0.823901	0.490403	1.68005	0.0929476	0.21585	1.53317	NA	ERV2	Endogenous Retrovirus	ERV2	Endogenous Retrovirus	ERV2	Endogenous Retrovirus	ERV2	Endogenous Retrovirus
RLTRETN_MM	47.573	-0.629149	0.294504	-2.1363	0.0326549	0.0992704	2.30991	NA	ERV2	Endogenous Retrovirus	ERV2	Endogenous Retrovirus	ERV2	Endogenous Retrovirus	ERV2	Endogenous Retrovirus
RMER10A	48.5868	0.194216	0.321339	0.604396	0.54558	0.694375	0.364744	NA	ERV3	Endogenous Retrovirus	ERV3	Endogenous Retrovirus	ERV3	Endogenous Retrovirus	ERV3	Endogenous Retrovirus
RMER15	22.4931	-0.0654558	0.364563	-0.179546	0.857509	0.909048	0.0953572	NA	ERV3	Endogenous Retrovirus	ERV3	Endogenous Retrovirus	ERV3	Endogenous Retrovirus	ERV3	Endogenous Retrovirus
RMER17A	8.02862	0.135975	0.619894	0.219353	0.826375	0.889943	0.116598	NA	ERV2	Endogenous Retrovirus	ERV2	Endogenous Retrovirus	ERV2	Endogenous Retrovirus	ERV2	Endogenous Retrovirus
RMER17B	41.9713	-0.748481	0.300268	-2.49271	0.0126771	0.049089	3.01412	NA	ERV2	Endogenous Retrovirus	ERV2	Endogenous Retrovirus	ERV2	Endogenous Retrovirus	ERV2	Endogenous Retrovirus
RMER17B2	19.7199	-0.947386	0.449004	-2.10997	0.0348608	0.100976	2.29287	NA	ERV2	Endogenous Retrovirus	ERV2	Endogenous Retrovirus	ERV2	Endogenous Retrovirus	ERV2	Endogenous Retrovirus
RMER17C	143.864	-0.328866	0.240268	-1.36875	0.171079	0.316999	1.14886	NA	ERV2	Endogenous Retrovirus	ERV2	Endogenous Retrovirus	ERV2	Endogenous Retrovirus	ERV2	Endogenous Retrovirus
RMER2	11.4247	-0.770836	0.511456	-1.50714	0.131774	0.267799	1.31752	NA	ERV1	Endogenous Retrovirus	ERV1	Endogenous Retrovirus	ERV1	Endogenous Retrovirus	ERV1	Endogenous Retrovirus
RMER20A	2.89678	-0.976016	1.08854	-0.896628	0.369917	0.545141	0.60671	NA	ERV2	Endogenous Retrovirus	ERV2	Endogenous Retrovirus	ERV2	Endogenous Retrovirus	ERV2	Endogenous Retrovirus
RMER21B	4.13222	0.223181	0.840309	0.265594	0.790552	0.86242	0.148013	NA	ERV1	Endogenous Retrovirus	ERV1	Endogenous Retrovirus	ERV1	Endogenous Retrovirus	ERV1	Endogenous Retrovirus
RMER6C	164.326	-0.288754	0.19739	-1.46286	0.143506	0.281809	1.26652	NA	ERV2	Endogenous Retrovirus	ERV2	Endogenous Retrovirus	ERV2	Endogenous Retrovirus	ERV2	Endogenous Retrovirus
RMER6D	53.7921	0.0117534	0.273097	0.0430375	0.965672	0.973397	0.0269632	NA	ERV2	Endogenous Retrovirus	ERV2	Endogenous Retrovirus	ERV2	Endogenous Retrovirus	ERV2	Endogenous Retrovirus

## Sheet: Extended Data Table 7
Extended Data Table 7: KDM5B ChIP-seq analysis of 1445 cells
chr	start	end	peak_id
chr19	60924555	60924898	WT_KDM5B.msd_peak_32200
chr2	16022256	16022631	WT_KDM5B.msd_peak_32431
chr3	67096725	67097041	WT_KDM5B.msd_peak_35720
chr4	147218941	147219888	WT_KDM5B.msd_peak_39443a
chr4	147218941	147219888	WT_KDM5B.msd_peak_39443b
chr4	147220349	147220549	WT_KDM5B.msd_peak_39444
chr4	147224752	147225161	WT_KDM5B.msd_peak_39445a
chr4	147224752	147225161	WT_KDM5B.msd_peak_39445b
chr4	147225627	147225920	WT_KDM5B.msd_peak_39446
chr4	147227134	147227377	WT_KDM5B.msd_peak_39447
chr17	3005135	3005393	WT_KDM5B.msd_peak_25595
chr17	3029815	3030053	WT_KDM5B.msd_peak_25596
chr17	3076831	3077273	WT_KDM5B.msd_peak_25597
chr17	3077473	3078099	WT_KDM5B.msd_peak_25598a
chr17	3077473	3078099	WT_KDM5B.msd_peak_25598b
chr17	3079288	3079576	WT_KDM5B.msd_peak_25599
chr17	3081500	3081727	WT_KDM5B.msd_peak_25600
chr17	3082054	3083194	WT_KDM5B.msd_peak_25601a
chr17	3082054	3083194	WT_KDM5B.msd_peak_25601b
chr17	3083967	3084649	WT_KDM5B.msd_peak_25602
chr17	3115233	3115821	WT_KDM5B.msd_peak_25603a
chr17	3115233	3115821	WT_KDM5B.msd_peak_25603b
chr17	3232857	3233058	WT_KDM5B.msd_peak_25604
chr17	3236916	3237117	WT_KDM5B.msd_peak_25605
chr17	3325989	3326443	WT_KDM5B.msd_peak_25606
chr17	3326605	3327296	WT_KDM5B.msd_peak_25607a
chr17	3326605	3327296	WT_KDM5B.msd_peak_25607b
chr17	3352915	3353387	WT_KDM5B.msd_peak_25608a
chr17	3352915	3353387	WT_KDM5B.msd_peak_25608b
chr17	3414475	3414784	WT_KDM5B.msd_peak_25609
chr17	3461836	3462150	WT_KDM5B.msd_peak_25610
chr17	3495467	3495686	WT_KDM5B.msd_peak_25611
chr17	3518077	3518544	WT_KDM5B.msd_peak_25612
chr17	4439198	4439485	WT_KDM5B.msd_peak_25613
chr17	4626174	4626526	WT_KDM5B.msd_peak_25614
chr17	4778242	4778456	WT_KDM5B.msd_peak_25615
chr17	4908373	4908939	WT_KDM5B.msd_peak_25616a
chr17	4908373	4908939	WT_KDM5B.msd_peak_25616b
chr17	4993953	4994183	WT_KDM5B.msd_peak_25617
chr17	4995268	4995919	WT_KDM5B.msd_peak_25618a
chr17	4995268	4995919	WT_KDM5B.msd_peak_25618b
chr17	4996357	4996606	WT_KDM5B.msd_peak_25619
chr17	5000921	5001146	WT_KDM5B.msd_peak_25620
chr17	5004057	5004479	WT_KDM5B.msd_peak_25621a
chr17	5004057	5004479	WT_KDM5B.msd_peak_25621b
chr17	5057368	5057774	WT_KDM5B.msd_peak_25622
chr17	5058470	5058682	WT_KDM5B.msd_peak_25623
chr17	5064862	5065067	WT_KDM5B.msd_peak_25624
chr17	5081189	5081400	WT_KDM5B.msd_peak_25625
chr17	5083005	5083518	WT_KDM5B.msd_peak_25626a
chr17	5083005	5083518	WT_KDM5B.msd_peak_25626b
chr17	5091623	5091879	WT_KDM5B.msd_peak_25627
chr17	5097619	5097823	WT_KDM5B.msd_peak_25628
chr17	5100913	5101266	WT_KDM5B.msd_peak_25629
chr17	5132901	5133243	WT_KDM5B.msd_peak_25630
chr17	5137951	5138245	WT_KDM5B.msd_peak_25631
chr17	5144807	5145177	WT_KDM5B.msd_peak_25632
chr17	5189565	5189769	WT_KDM5B.msd_peak_25633
chr17	5189964	5190165	WT_KDM5B.msd_peak_25634
chr17	5217092	5217430	WT_KDM5B.msd_peak_25635
chr17	5240918	5241224	WT_KDM5B.msd_peak_25636
chr17	5246844	5247044	WT_KDM5B.msd_peak_25637
chr17	5258965	5259165	WT_KDM5B.msd_peak_25638
chr17	5274218	5274459	WT_KDM5B.msd_peak_25639
chr17	5284692	5285104	WT_KDM5B.msd_peak_25640a
chr17	5284692	5285104	WT_KDM5B.msd_peak_25640b
chr17	5290996	5291218	WT_KDM5B.msd_peak_25641
chr17	5295807	5296112	WT_KDM5B.msd_peak_25642
chr17	5304524	5304724	WT_KDM5B.msd_peak_25643
chr17	5306746	5306967	WT_KDM5B.msd_peak_25644
chr17	5336650	5337139	WT_KDM5B.msd_peak_25645a
chr17	5336650	5337139	WT_KDM5B.msd_peak_25645b
chr17	5341761	5342093	WT_KDM5B.msd_peak_25646
chr17	5342805	5343020	WT_KDM5B.msd_peak_25647
chr17	5372679	5372992	WT_KDM5B.msd_peak_25648
chr17	5397231	5397600	WT_KDM5B.msd_peak_25649
chr17	5402610	5402898	WT_KDM5B.msd_peak_25650
chr17	5428275	5428475	WT_KDM5B.msd_peak_25651
chr17	5429883	5430083	WT_KDM5B.msd_peak_25652
chr17	5492721	5493110	WT_KDM5B.msd_peak_25653
chr17	5493308	5493574	WT_KDM5B.msd_peak_25654
chr17	5621803	5622070	WT_KDM5B.msd_peak_25655
chr17	5741442	5741751	WT_KDM5B.msd_peak_25656
chr17	5752668	5753255	WT_KDM5B.msd_peak_25657
chr17	5765743	5765943	WT_KDM5B.msd_peak_25658
chr17	5772413	5772613	WT_KDM5B.msd_peak_25659
chr17	5792464	5792693	WT_KDM5B.msd_peak_25660
chr17	5811190	5811741	WT_KDM5B.msd_peak_25661a
chr17	5811190	5811741	WT_KDM5B.msd_peak_25661b
chr17	5812760	5812988	WT_KDM5B.msd_peak_25662
chr17	5816381	5816635	WT_KDM5B.msd_peak_25663
chr17	5840874	5841126	WT_KDM5B.msd_peak_25664
chr17	5841319	5841549	WT_KDM5B.msd_peak_25665
chr17	5841697	5841949	WT_KDM5B.msd_peak_25666
chr17	5854011	5854211	WT_KDM5B.msd_peak_25667
chr17	5860297	5860584	WT_KDM5B.msd_peak_25668
chr17	5872591	5872818	WT_KDM5B.msd_peak_25669
chr17	5875674	5875881	WT_KDM5B.msd_peak_25670
chr17	5886229	5886450	WT_KDM5B.msd_peak_25671
chr17	5890369	5890627	WT_KDM5B.msd_peak_25672
chr17	5891861	5892064	WT_KDM5B.msd_peak_25673
chr17	5895551	5895852	WT_KDM5B.msd_peak_25674
chr17	5902794	5903085	WT_KDM5B.msd_peak_25675
chr17	5904601	5904803	WT_KDM5B.msd_peak_25676
chr17	5906500	5906727	WT_KDM5B.msd_peak_25677
chr17	5911661	5911945	WT_KDM5B.msd_peak_25678
chr17	5919021	5919295	WT_KDM5B.msd_peak_25679
chr17	5920488	5920704	WT_KDM5B.msd_peak_25680
chr17	5923561	5923932	WT_KDM5B.msd_peak_25681
chr17	5928379	5928630	WT_KDM5B.msd_peak_25682
chr17	5931209	5931491	WT_KDM5B.msd_peak_25683
chr17	5934927	5935169	WT_KDM5B.msd_peak_25684
chr17	5940923	5941169	WT_KDM5B.msd_peak_25685
chr17	5941366	5941951	WT_KDM5B.msd_peak_25686
chr17	5949256	5949814	WT_KDM5B.msd_peak_25687a
chr17	5949256	5949814	WT_KDM5B.msd_peak_25687b
chr17	5958296	5958592	WT_KDM5B.msd_peak_25688
chr17	5958855	5959212	WT_KDM5B.msd_peak_25689
chr17	5976349	5976549	WT_KDM5B.msd_peak_25690
chr17	5978470	5978698	WT_KDM5B.msd_peak_25691
chr17	5987934	5988163	WT_KDM5B.msd_peak_25692
chr17	6000882	6001447	WT_KDM5B.msd_peak_25693a
chr17	6000882	6001447	WT_KDM5B.msd_peak_25693b
chr17	6016044	6016244	WT_KDM5B.msd_peak_25694
chr17	6032492	6032751	WT_KDM5B.msd_peak_25695
chr17	6043844	6044056	WT_KDM5B.msd_peak_25696
chr17	6055533	6055744	WT_KDM5B.msd_peak_25697
chr17	6055910	6056143	WT_KDM5B.msd_peak_25698
chr17	6079399	6079712	WT_KDM5B.msd_peak_25699
chr17	6079876	6080104	WT_KDM5B.msd_peak_25700
chr17	6107164	6107492	WT_KDM5B.msd_peak_25701
chr17	6121217	6121733	WT_KDM5B.msd_peak_25702a
chr17	6121217	6121733	WT_KDM5B.msd_peak_25702b
chr17	6121961	6122231	WT_KDM5B.msd_peak_25703
chr17	6123888	6124142	WT_KDM5B.msd_peak_25704
chr17	6132128	6132567	WT_KDM5B.msd_peak_25705a
chr17	6132128	6132567	WT_KDM5B.msd_peak_25705b
chr17	6146774	6147034	WT_KDM5B.msd_peak_25706
chr17	6187115	6187342	WT_KDM5B.msd_peak_25707
chr17	6190480	6190727	WT_KDM5B.msd_peak_25708
chr17	6204992	6205268	WT_KDM5B.msd_peak_25709
chr17	6209243	6209683	WT_KDM5B.msd_peak_25710a
chr17	6209243	6209683	WT_KDM5B.msd_peak_25710b
chr17	6231958	6232243	WT_KDM5B.msd_peak_25711
chr17	6232549	6232861	WT_KDM5B.msd_peak_25712
chr17	6256638	6257029	WT_KDM5B.msd_peak_25713
chr17	6262522	6262745	WT_KDM5B.msd_peak_25714
chr17	6274025	6274238	WT_KDM5B.msd_peak_25715
chr17	6279123	6279364	WT_KDM5B.msd_peak_25716
chr17	6280394	6280855	WT_KDM5B.msd_peak_25717a
chr17	6280394	6280855	WT_KDM5B.msd_peak_25717b
chr17	6281536	6281831	WT_KDM5B.msd_peak_25718
chr17	6284214	6284416	WT_KDM5B.msd_peak_25719
chr17	6287440	6287664	WT_KDM5B.msd_peak_25720
chr17	6297044	6297265	WT_KDM5B.msd_peak_25721
chr17	6297484	6297708	WT_KDM5B.msd_peak_25722
chr17	6305084	6305521	WT_KDM5B.msd_peak_25723
chr17	6306521	6306755	WT_KDM5B.msd_peak_25724
chr17	6310158	6310451	WT_KDM5B.msd_peak_25725
chr17	6313362	6313703	WT_KDM5B.msd_peak_25726
chr17	6316710	6317011	WT_KDM5B.msd_peak_25727
chr17	6321464	6321834	WT_KDM5B.msd_peak_25728
chr17	6342781	6343024	WT_KDM5B.msd_peak_25729
chr17	6343193	6343534	WT_KDM5B.msd_peak_25730
chr17	6376027	6376249	WT_KDM5B.msd_peak_25731
chr17	6391792	6392137	WT_KDM5B.msd_peak_25732a
chr17	6391792	6392137	WT_KDM5B.msd_peak_25732b
chr17	6408922	6409156	WT_KDM5B.msd_peak_25733
chr17	6422044	6422247	WT_KDM5B.msd_peak_25734
chr17	6422868	6423145	WT_KDM5B.msd_peak_25735
chr17	6430145	6430423	WT_KDM5B.msd_peak_25736
chr17	6433180	6433503	WT_KDM5B.msd_peak_25737
chr17	6440670	6441000	WT_KDM5B.msd_peak_25738
chr17	6441296	6441820	WT_KDM5B.msd_peak_25739
chr17	6445589	6445816	WT_KDM5B.msd_peak_25740
chr17	6445945	6446189	WT_KDM5B.msd_peak_25741
chr17	6451755	6451957	WT_KDM5B.msd_peak_25742
chr17	6455670	6456368	WT_KDM5B.msd_peak_25743a
chr17	6455670	6456368	WT_KDM5B.msd_peak_25743b
chr17	6463140	6463442	WT_KDM5B.msd_peak_25744
chr17	6465880	6466197	WT_KDM5B.msd_peak_25745
chr17	6466987	6467541	WT_KDM5B.msd_peak_25746
chr17	6468078	6468520	WT_KDM5B.msd_peak_25747
chr17	6471361	6471791	WT_KDM5B.msd_peak_25748
chr17	6473385	6473911	WT_KDM5B.msd_peak_25749a
chr17	6473385	6473911	WT_KDM5B.msd_peak_25749b
chr17	6475338	6475557	WT_KDM5B.msd_peak_25750
chr17	6476417	6477415	WT_KDM5B.msd_peak_25751a
chr17	6476417	6477415	WT_KDM5B.msd_peak_25751b
chr17	6478791	6479101	WT_KDM5B.msd_peak_25752a
chr17	6478791	6479101	WT_KDM5B.msd_peak_25752b
chr17	6481682	6481923	WT_KDM5B.msd_peak_25753
chr17	6489960	6490768	WT_KDM5B.msd_peak_25754a
chr17	6489960	6490768	WT_KDM5B.msd_peak_25754b
chr17	6489960	6490768	WT_KDM5B.msd_peak_25754c
chr17	6492543	6493290	WT_KDM5B.msd_peak_25755a
chr17	6492543	6493290	WT_KDM5B.msd_peak_25755b
chr17	6493931	6494383	WT_KDM5B.msd_peak_25756
chr17	6515298	6515733	WT_KDM5B.msd_peak_25757
chr17	6521860	6522148	WT_KDM5B.msd_peak_25758
chr17	6555036	6555236	WT_KDM5B.msd_peak_25759
chr17	6605706	6605979	WT_KDM5B.msd_peak_25760
chr17	6611625	6611860	WT_KDM5B.msd_peak_25761
chr17	6612924	6613124	WT_KDM5B.msd_peak_25762
chr17	6627437	6627798	WT_KDM5B.msd_peak_25763
chr17	6631782	6631997	WT_KDM5B.msd_peak_25764
chr17	6639492	6639991	WT_KDM5B.msd_peak_25765a
chr17	6639492	6639991	WT_KDM5B.msd_peak_25765b
chr17	6655057	6655458	WT_KDM5B.msd_peak_25766
chr17	6676225	6676483	WT_KDM5B.msd_peak_25767
chr17	6699571	6699991	WT_KDM5B.msd_peak_25768
chr17	6724158	6724358	WT_KDM5B.msd_peak_25769
chr17	6782572	6783124	WT_KDM5B.msd_peak_25770
chr17	6827690	6827999	WT_KDM5B.msd_peak_25771
chr17	6861679	6861890	WT_KDM5B.msd_peak_25772
chr17	6913902	6914232	WT_KDM5B.msd_peak_25773
chr17	6924709	6925015	WT_KDM5B.msd_peak_25774
chr17	6936158	6936483	WT_KDM5B.msd_peak_25775
chr17	6947939	6948382	WT_KDM5B.msd_peak_25776a
chr17	6947939	6948382	WT_KDM5B.msd_peak_25776b
chr17	6971316	6971517	WT_KDM5B.msd_peak_25777
chr17	6978107	6978680	WT_KDM5B.msd_peak_25778a
chr17	6978107	6978680	WT_KDM5B.msd_peak_25778b
chr17	7025161	7025513	WT_KDM5B.msd_peak_25779
chr17	7033849	7034049	WT_KDM5B.msd_peak_25780
chr17	7057592	7057817	WT_KDM5B.msd_peak_25781
chr17	7089498	7089767	WT_KDM5B.msd_peak_25782
chr17	7120384	7120606	WT_KDM5B.msd_peak_25783
chr17	7170199	7170550	WT_KDM5B.msd_peak_25784
chr17	7170736	7170989	WT_KDM5B.msd_peak_25785
chr17	7187076	7187329	WT_KDM5B.msd_peak_25786
chr17	7203622	7203822	WT_KDM5B.msd_peak_25787
chr17	7228552	7228756	WT_KDM5B.msd_peak_25788
chr17	7466684	7467064	WT_KDM5B.msd_peak_25789
chr17	7826811	7827420	WT_KDM5B.msd_peak_25790a
chr17	7826811	7827420	WT_KDM5B.msd_peak_25790b
chr17	7946044	7946327	WT_KDM5B.msd_peak_25791
chr17	7956173	7956925	WT_KDM5B.msd_peak_25792a
chr17	7956173	7956925	WT_KDM5B.msd_peak_25792b
chr17	7957079	7957346	WT_KDM5B.msd_peak_25793
chr17	7969945	7970321	WT_KDM5B.msd_peak_25794
chr17	8028299	8028509	WT_KDM5B.msd_peak_25795
chr17	8036201	8036647	WT_KDM5B.msd_peak_25796
chr17	8092678	8092975	WT_KDM5B.msd_peak_25797
chr17	8126793	8127039	WT_KDM5B.msd_peak_25798
chr17	8147519	8147790	WT_KDM5B.msd_peak_25799
chr17	8148047	8148460	WT_KDM5B.msd_peak_25800
chr17	8165071	8165291	WT_KDM5B.msd_peak_25801
chr17	8165580	8165875	WT_KDM5B.msd_peak_25802
chr17	8205176	8205396	WT_KDM5B.msd_peak_25803
chr17	8256640	8256853	WT_KDM5B.msd_peak_25804
chr17	8282856	8283155	WT_KDM5B.msd_peak_25805
chr17	8283319	8283608	WT_KDM5B.msd_peak_25806
chr17	8283863	8284689	WT_KDM5B.msd_peak_25807a
chr17	8283863	8284689	WT_KDM5B.msd_peak_25807b
chr17	8283863	8284689	WT_KDM5B.msd_peak_25807c
chr17	8283863	8284689	WT_KDM5B.msd_peak_25807d
chr17	8311217	8311555	WT_KDM5B.msd_peak_25808
chr17	8325246	8325451	WT_KDM5B.msd_peak_25809
chr17	8326896	8327168	WT_KDM5B.msd_peak_25810
chr17	8328664	8328995	WT_KDM5B.msd_peak_25811
chr17	8341609	8342240	WT_KDM5B.msd_peak_25812
chr17	8411687	8411902	WT_KDM5B.msd_peak_25813
chr17	8736433	8736643	WT_KDM5B.msd_peak_25814
chr17	8801682	8802277	WT_KDM5B.msd_peak_25815a
chr17	8801682	8802277	WT_KDM5B.msd_peak_25815b
chr17	8831454	8831661	WT_KDM5B.msd_peak_25816
chr17	8872346	8872554	WT_KDM5B.msd_peak_25817
chr17	9030752	9031296	WT_KDM5B.msd_peak_25818
chr17	9192348	9192652	WT_KDM5B.msd_peak_25819
chr17	9194799	9194999	WT_KDM5B.msd_peak_25820
chr17	9490088	9490469	WT_KDM5B.msd_peak_25821
chr17	9669357	9669775	WT_KDM5B.msd_peak_25822
chr17	9787374	9787720	WT_KDM5B.msd_peak_25823
chr17	9825593	9825793	WT_KDM5B.msd_peak_25824
chr17	10246558	10246792	WT_KDM5B.msd_peak_25825
chr17	10319910	10320285	WT_KDM5B.msd_peak_25826
chr17	10439763	10439970	WT_KDM5B.msd_peak_25827
chr17	10726003	10726295	WT_KDM5B.msd_peak_25828
chr17	10840405	10840631	WT_KDM5B.msd_peak_25829
chr17	10899097	10899297	WT_KDM5B.msd_peak_25830
chr17	10974422	10974683	WT_KDM5B.msd_peak_25831
chr17	11008557	11008777	WT_KDM5B.msd_peak_25832
chr17	11402041	11402268	WT_KDM5B.msd_peak_25833
chr17	11499560	11500212	WT_KDM5B.msd_peak_25834a
chr17	11499560	11500212	WT_KDM5B.msd_peak_25834b
chr17	11725658	11725870	WT_KDM5B.msd_peak_25835
chr17	11918317	11918811	WT_KDM5B.msd_peak_25836a
chr17	11918317	11918811	WT_KDM5B.msd_peak_25836b
chr17	11975300	11975658	WT_KDM5B.msd_peak_25837
chr17	12016293	12016542	WT_KDM5B.msd_peak_25838
chr17	12018560	12019218	WT_KDM5B.msd_peak_25839a
chr17	12018560	12019218	WT_KDM5B.msd_peak_25839b
chr17	12118730	12118997	WT_KDM5B.msd_peak_25840
chr17	12119475	12119927	WT_KDM5B.msd_peak_25841a
chr17	12119475	12119927	WT_KDM5B.msd_peak_25841b
chr17	12144440	12144759	WT_KDM5B.msd_peak_25842
chr17	12160026	12160264	WT_KDM5B.msd_peak_25843
chr17	12203425	12203843	WT_KDM5B.msd_peak_25844
chr17	12219214	12219438	WT_KDM5B.msd_peak_25845
chr17	12267344	12267613	WT_KDM5B.msd_peak_25846
chr17	12268668	12268905	WT_KDM5B.msd_peak_25847
chr17	12271040	12271448	WT_KDM5B.msd_peak_25848
chr17	12271626	12272000	WT_KDM5B.msd_peak_25849
chr17	12287753	12287965	WT_KDM5B.msd_peak_25850
chr17	12297054	12297392	WT_KDM5B.msd_peak_25851
chr17	12298072	12298349	WT_KDM5B.msd_peak_25852
chr17	12318179	12318969	WT_KDM5B.msd_peak_25853a
chr17	12318179	12318969	WT_KDM5B.msd_peak_25853b
chr17	12318179	12318969	WT_KDM5B.msd_peak_25853c
chr17	12403075	12403341	WT_KDM5B.msd_peak_25854
chr17	12636263	12636893	WT_KDM5B.msd_peak_25855a
chr17	12636263	12636893	WT_KDM5B.msd_peak_25855b
chr17	12660881	12661525	WT_KDM5B.msd_peak_25856a
chr17	12660881	12661525	WT_KDM5B.msd_peak_25856b
chr17	12660881	12661525	WT_KDM5B.msd_peak_25856c
chr17	12675335	12675554	WT_KDM5B.msd_peak_25857
chr17	12687645	12688067	WT_KDM5B.msd_peak_25858
chr17	12689023	12689341	WT_KDM5B.msd_peak_25859
chr17	12697964	12698288	WT_KDM5B.msd_peak_25860
chr17	12698663	12698922	WT_KDM5B.msd_peak_25861
chr17	12706428	12706713	WT_KDM5B.msd_peak_25862
chr17	12741335	12741740	WT_KDM5B.msd_peak_25863
chr17	12742169	12742511	WT_KDM5B.msd_peak_25864
chr17	12761783	12762018	WT_KDM5B.msd_peak_25865
chr17	12769061	12770131	WT_KDM5B.msd_peak_25866a
chr17	12769061	12770131	WT_KDM5B.msd_peak_25866b
chr17	12769061	12770131	WT_KDM5B.msd_peak_25866c
chr17	12816116	12816366	WT_KDM5B.msd_peak_25867
chr17	12818814	12819068	WT_KDM5B.msd_peak_25868
chr17	12909754	12910140	WT_KDM5B.msd_peak_25869
chr17	12915753	12916065	WT_KDM5B.msd_peak_25870
chr17	12916516	12916844	WT_KDM5B.msd_peak_25871
chr17	12956158	12956412	WT_KDM5B.msd_peak_25872
chr17	12980512	12980716	WT_KDM5B.msd_peak_25873
chr17	12987856	12988178	WT_KDM5B.msd_peak_25874
chr17	12991685	12992215	WT_KDM5B.msd_peak_25875
chr17	12992709	12992939	WT_KDM5B.msd_peak_25876
chr17	13007886	13008443	WT_KDM5B.msd_peak_25877a
chr17	13007886	13008443	WT_KDM5B.msd_peak_25877b
chr17	13065691	13065898	WT_KDM5B.msd_peak_25878
chr17	13090083	13090815	WT_KDM5B.msd_peak_25879a
chr17	13090083	13090815	WT_KDM5B.msd_peak_25879b
chr17	13090083	13090815	WT_KDM5B.msd_peak_25879c
chr17	13123361	13123584	WT_KDM5B.msd_peak_25880
chr17	13157850	13158050	WT_KDM5B.msd_peak_25881
chr17	13177859	13178145	WT_KDM5B.msd_peak_25882
chr17	13186584	13187000	WT_KDM5B.msd_peak_25883a
chr17	13186584	13187000	WT_KDM5B.msd_peak_25883b
chr17	13187788	13188056	WT_KDM5B.msd_peak_25884
chr17	13190902	13191140	WT_KDM5B.msd_peak_25885
chr17	13192963	13193247	WT_KDM5B.msd_peak_25886
chr17	13195285	13195563	WT_KDM5B.msd_peak_25887
chr17	13234423	13234658	WT_KDM5B.msd_peak_25888
chr17	13234911	13235131	WT_KDM5B.msd_peak_25889
chr17	13238452	13238715	WT_KDM5B.msd_peak_25890
chr17	13240719	13241011	WT_KDM5B.msd_peak_25891
chr17	13241330	13241592	WT_KDM5B.msd_peak_25892
chr17	13243384	13243609	WT_KDM5B.msd_peak_25893
chr17	13305866	13306343	WT_KDM5B.msd_peak_25894
chr17	13309218	13309555	WT_KDM5B.msd_peak_25895
chr17	13321594	13321929	WT_KDM5B.msd_peak_25896
chr17	13330708	13330951	WT_KDM5B.msd_peak_25897
chr17	13333517	13333720	WT_KDM5B.msd_peak_25898
chr17	13345000	13345442	WT_KDM5B.msd_peak_25899a
chr17	13345000	13345442	WT_KDM5B.msd_peak_25899b
chr17	13346857	13347057	WT_KDM5B.msd_peak_25900
chr17	13353385	13353586	WT_KDM5B.msd_peak_25901
chr17	13359206	13359406	WT_KDM5B.msd_peak_25902
chr17	13362425	13362704	WT_KDM5B.msd_peak_25903
chr17	13382754	13383062	WT_KDM5B.msd_peak_25904
chr17	13413290	13413557	WT_KDM5B.msd_peak_25905
chr17	13422689	13423065	WT_KDM5B.msd_peak_25906
chr17	13432759	13433009	WT_KDM5B.msd_peak_25907
chr17	13439480	13439764	WT_KDM5B.msd_peak_25908
chr17	13448332	13448933	WT_KDM5B.msd_peak_25909a
chr17	13448332	13448933	WT_KDM5B.msd_peak_25909b
chr17	13448332	13448933	WT_KDM5B.msd_peak_25909c
chr17	13448332	13448933	WT_KDM5B.msd_peak_25909d
chr17	13469822	13470036	WT_KDM5B.msd_peak_25910
chr17	13476011	13476215	WT_KDM5B.msd_peak_25911
chr17	13494714	13494939	WT_KDM5B.msd_peak_25912
chr17	13550572	13553196	WT_KDM5B.msd_peak_25913a
chr17	13550572	13553196	WT_KDM5B.msd_peak_25913b
chr17	13550572	13553196	WT_KDM5B.msd_peak_25913c
chr17	13550572	13553196	WT_KDM5B.msd_peak_25913d
chr17	13550572	13553196	WT_KDM5B.msd_peak_25913e
chr17	13679844	13680185	WT_KDM5B.msd_peak_25914
chr17	13687506	13687706	WT_KDM5B.msd_peak_25915
chr17	13760921	13761796	WT_KDM5B.msd_peak_25916a
chr17	13760921	13761796	WT_KDM5B.msd_peak_25916b
chr17	13844293	13844570	WT_KDM5B.msd_peak_25917
chr17	13844706	13844998	WT_KDM5B.msd_peak_25918
chr17	13898908	13899457	WT_KDM5B.msd_peak_25919a
chr17	13898908	13899457	WT_KDM5B.msd_peak_25919b
chr17	14077070	14077421	WT_KDM5B.msd_peak_25920
chr17	14094373	14094761	WT_KDM5B.msd_peak_25921
chr17	14155966	14156202	WT_KDM5B.msd_peak_25922
chr17	14167500	14167797	WT_KDM5B.msd_peak_25923
chr17	14195773	14196284	WT_KDM5B.msd_peak_25924
chr17	14196755	14196958	WT_KDM5B.msd_peak_25925
chr17	14197881	14198137	WT_KDM5B.msd_peak_25926
chr17	14203160	14203424	WT_KDM5B.msd_peak_25927
chr17	14203734	14203935	WT_KDM5B.msd_peak_25928
chr17	14226056	14226256	WT_KDM5B.msd_peak_25929
chr17	14279096	14279956	WT_KDM5B.msd_peak_25930a
chr17	14279096	14279956	WT_KDM5B.msd_peak_25930b
chr17	14280431	14280761	WT_KDM5B.msd_peak_25931
chr17	14333509	14333709	WT_KDM5B.msd_peak_25932
chr17	14372271	14372668	WT_KDM5B.msd_peak_25933
chr17	14375193	14375590	WT_KDM5B.msd_peak_25934
chr17	14413376	14413603	WT_KDM5B.msd_peak_25935
chr17	14454208	14454579	WT_KDM5B.msd_peak_25936
chr17	14455390	14455608	WT_KDM5B.msd_peak_25937
chr17	14476767	14477003	WT_KDM5B.msd_peak_25938
chr17	14516248	14516503	WT_KDM5B.msd_peak_25939
chr17	14517674	14517921	WT_KDM5B.msd_peak_25940
chr17	14541101	14541350	WT_KDM5B.msd_peak_25941
chr17	14570146	14570357	WT_KDM5B.msd_peak_25942
chr17	14586588	14586946	WT_KDM5B.msd_peak_25943
chr17	14628004	14628216	WT_KDM5B.msd_peak_25944
chr17	14639764	14639984	WT_KDM5B.msd_peak_25945
chr17	14640739	14641083	WT_KDM5B.msd_peak_25946
chr17	14738782	14738991	WT_KDM5B.msd_peak_25947
chr17	14817778	14818016	WT_KDM5B.msd_peak_25948
chr17	14824940	14825140	WT_KDM5B.msd_peak_25949
chr17	14871315	14871528	WT_KDM5B.msd_peak_25950
chr17	14873400	14873600	WT_KDM5B.msd_peak_25951
chr17	14904331	14904572	WT_KDM5B.msd_peak_25952
chr17	14908279	14908560	WT_KDM5B.msd_peak_25953
chr17	14935324	14935524	WT_KDM5B.msd_peak_25954
chr17	14943317	14943952	WT_KDM5B.msd_peak_25955
chr17	14953690	14953890	WT_KDM5B.msd_peak_25956
chr17	14960672	14961201	WT_KDM5B.msd_peak_25957a
chr17	14960672	14961201	WT_KDM5B.msd_peak_25957b
chr17	14961518	14962279	WT_KDM5B.msd_peak_25958
chr17	14962852	14963052	WT_KDM5B.msd_peak_25959
chr17	14978401	14978976	WT_KDM5B.msd_peak_25960
chr17	14981521	14981728	WT_KDM5B.msd_peak_25961
chr17	14988963	14989312	WT_KDM5B.msd_peak_25962
chr17	14992199	14992854	WT_KDM5B.msd_peak_25963a
chr17	14992199	14992854	WT_KDM5B.msd_peak_25963b
chr17	14993128	14993848	WT_KDM5B.msd_peak_25964a
chr17	14993128	14993848	WT_KDM5B.msd_peak_25964b
chr17	15008419	15008634	WT_KDM5B.msd_peak_25965
chr17	15009743	15010236	WT_KDM5B.msd_peak_25966
chr17	15017670	15017891	WT_KDM5B.msd_peak_25967
chr17	15023555	15024176	WT_KDM5B.msd_peak_25968
chr17	15024484	15025261	WT_KDM5B.msd_peak_25969a
chr17	15024484	15025261	WT_KDM5B.msd_peak_25969b
chr17	15039765	15039969	WT_KDM5B.msd_peak_25970
chr17	15044260	15044475	WT_KDM5B.msd_peak_25971
chr17	15051632	15052004	WT_KDM5B.msd_peak_25972
chr17	15054927	15055169	WT_KDM5B.msd_peak_25973
chr17	15116025	15116227	WT_KDM5B.msd_peak_25974
chr17	15157837	15158333	WT_KDM5B.msd_peak_25975a
chr17	15157837	15158333	WT_KDM5B.msd_peak_25975b
chr17	15183903	15184103	WT_KDM5B.msd_peak_25976
chr17	15195104	15195486	WT_KDM5B.msd_peak_25977
chr17	15247947	15248334	WT_KDM5B.msd_peak_25978a
chr17	15247947	15248334	WT_KDM5B.msd_peak_25978b
chr17	15301257	15301457	WT_KDM5B.msd_peak_25979
chr17	15323579	15323784	WT_KDM5B.msd_peak_25980
chr17	15367797	15367997	WT_KDM5B.msd_peak_25981
chr17	15368557	15369157	WT_KDM5B.msd_peak_25982a
chr17	15368557	15369157	WT_KDM5B.msd_peak_25982b
chr17	15373414	15373673	WT_KDM5B.msd_peak_25983
chr17	15374556	15375310	WT_KDM5B.msd_peak_25984a
chr17	15374556	15375310	WT_KDM5B.msd_peak_25984b
chr17	15374556	15375310	WT_KDM5B.msd_peak_25984c
chr17	15375685	15376042	WT_KDM5B.msd_peak_25985
chr17	15376198	15376449	WT_KDM5B.msd_peak_25986
chr17	15377005	15377210	WT_KDM5B.msd_peak_25987
chr17	15380672	15381208	WT_KDM5B.msd_peak_25988a
chr17	15380672	15381208	WT_KDM5B.msd_peak_25988b
chr17	15396395	15396609	WT_KDM5B.msd_peak_25989
chr17	15472460	15472761	WT_KDM5B.msd_peak_25990
chr17	15486166	15486452	WT_KDM5B.msd_peak_25991
chr17	15497910	15498378	WT_KDM5B.msd_peak_25992
chr17	15499977	15500329	WT_KDM5B.msd_peak_25993
chr17	15526845	15527249	WT_KDM5B.msd_peak_25994
chr17	15536478	15536765	WT_KDM5B.msd_peak_25995
chr17	15560800	15561013	WT_KDM5B.msd_peak_25996
chr17	15633779	15634236	WT_KDM5B.msd_peak_25997a
chr17	15633779	15634236	WT_KDM5B.msd_peak_25997b
chr17	15671223	15671483	WT_KDM5B.msd_peak_25998
chr17	15701957	15702163	WT_KDM5B.msd_peak_25999
chr17	15705024	15705313	WT_KDM5B.msd_peak_26000
chr17	15705496	15706142	WT_KDM5B.msd_peak_26001a
chr17	15705496	15706142	WT_KDM5B.msd_peak_26001b
chr17	15705496	15706142	WT_KDM5B.msd_peak_26001c
chr17	15727042	15727347	WT_KDM5B.msd_peak_26002
chr17	15728173	15728447	WT_KDM5B.msd_peak_26003
chr17	15807197	15807812	WT_KDM5B.msd_peak_26004
chr17	15815802	15816045	WT_KDM5B.msd_peak_26005
chr17	15825407	15826536	WT_KDM5B.msd_peak_26006a
chr17	15825407	15826536	WT_KDM5B.msd_peak_26006b
chr17	15825407	15826536	WT_KDM5B.msd_peak_26006c
chr17	15825407	15826536	WT_KDM5B.msd_peak_26006d
chr17	15830578	15831251	WT_KDM5B.msd_peak_26007a
chr17	15830578	15831251	WT_KDM5B.msd_peak_26007b
chr17	15919017	15919217	WT_KDM5B.msd_peak_26008
chr17	16130870	16131242	WT_KDM5B.msd_peak_26009
chr17	16137078	16137429	WT_KDM5B.msd_peak_26010
chr17	16158264	16158467	WT_KDM5B.msd_peak_26011
chr17	16228240	16228471	WT_KDM5B.msd_peak_26012
chr17	16279471	16279853	WT_KDM5B.msd_peak_26013
chr17	16354584	16354899	WT_KDM5B.msd_peak_26014
chr17	16526412	16526617	WT_KDM5B.msd_peak_26015
chr17	16742164	16742457	WT_KDM5B.msd_peak_26016
chr17	16762927	16763337	WT_KDM5B.msd_peak_26017
chr17	16847238	16847483	WT_KDM5B.msd_peak_26018
chr17	16857958	16858262	WT_KDM5B.msd_peak_26019
chr17	16997181	16997591	WT_KDM5B.msd_peak_26020a
chr17	16997181	16997591	WT_KDM5B.msd_peak_26020b
chr17	17010209	17010712	WT_KDM5B.msd_peak_26021a
chr17	17010209	17010712	WT_KDM5B.msd_peak_26021b
chr17	17113478	17113678	WT_KDM5B.msd_peak_26022
chr17	17140037	17140252	WT_KDM5B.msd_peak_26023
chr17	17167966	17168353	WT_KDM5B.msd_peak_26024
chr17	17199873	17200131	WT_KDM5B.msd_peak_26025
chr17	17213371	17213618	WT_KDM5B.msd_peak_26026
chr17	17214805	17215156	WT_KDM5B.msd_peak_26027
chr17	17303744	17303990	WT_KDM5B.msd_peak_26028
chr17	17317343	17317595	WT_KDM5B.msd_peak_26029
chr17	17393399	17393606	WT_KDM5B.msd_peak_26030
chr17	17409742	17409942	WT_KDM5B.msd_peak_26031
chr17	17542245	17542493	WT_KDM5B.msd_peak_26032
chr17	17554846	17555093	WT_KDM5B.msd_peak_26033
chr17	17623869	17624516	WT_KDM5B.msd_peak_26034
chr17	17625183	17625468	WT_KDM5B.msd_peak_26035
chr17	17827152	17827424	WT_KDM5B.msd_peak_26036
chr17	17827859	17828585	WT_KDM5B.msd_peak_26037a
chr17	17827859	17828585	WT_KDM5B.msd_peak_26037b
chr17	17830179	17830494	WT_KDM5B.msd_peak_26038
chr17	17843668	17844217	WT_KDM5B.msd_peak_26039
chr17	17849951	17850695	WT_KDM5B.msd_peak_26040a
chr17	17849951	17850695	WT_KDM5B.msd_peak_26040b
chr17	17849951	17850695	WT_KDM5B.msd_peak_26040c
chr17	17910053	17910431	WT_KDM5B.msd_peak_26041
chr17	17978513	17978777	WT_KDM5B.msd_peak_26042
chr17	18130524	18130825	WT_KDM5B.msd_peak_26043
chr17	18140871	18141149	WT_KDM5B.msd_peak_26044
chr17	18217549	18217862	WT_KDM5B.msd_peak_26045a
chr17	18217549	18217862	WT_KDM5B.msd_peak_26045b
chr17	18345788	18346105	WT_KDM5B.msd_peak_26046
chr17	18521433	18521747	WT_KDM5B.msd_peak_26047
chr17	18530160	18530644	WT_KDM5B.msd_peak_26048
chr17	19103829	19104173	WT_KDM5B.msd_peak_26049
chr17	19245857	19246113	WT_KDM5B.msd_peak_26050
chr17	19485040	19485273	WT_KDM5B.msd_peak_26051
chr17	19911834	19912126	WT_KDM5B.msd_peak_26052
chr17	20022291	20022609	WT_KDM5B.msd_peak_26053
chr17	20144220	20144561	WT_KDM5B.msd_peak_26054
chr17	20378860	20379097	WT_KDM5B.msd_peak_26055
chr17	20390583	20390783	WT_KDM5B.msd_peak_26056
chr17	20639087	20639396	WT_KDM5B.msd_peak_26057
chr17	20639952	20640152	WT_KDM5B.msd_peak_26058
chr17	20945573	20945950	WT_KDM5B.msd_peak_26059a
chr17	20945573	20945950	WT_KDM5B.msd_peak_26059b
chr17	20985611	20985824	WT_KDM5B.msd_peak_26060
chr17	21035261	21035461	WT_KDM5B.msd_peak_26061
chr17	21035826	21036405	WT_KDM5B.msd_peak_26062
chr17	21272322	21272686	WT_KDM5B.msd_peak_26063
chr17	21277169	21277411	WT_KDM5B.msd_peak_26064
chr17	21298749	21298959	WT_KDM5B.msd_peak_26065
chr17	21299446	21299758	WT_KDM5B.msd_peak_26066
chr17	21370019	21370363	WT_KDM5B.msd_peak_26067
chr17	21489089	21489364	WT_KDM5B.msd_peak_26068
chr17	21532418	21532770	WT_KDM5B.msd_peak_26069
chr17	21535665	21536021	WT_KDM5B.msd_peak_26070
chr17	21551197	21551647	WT_KDM5B.msd_peak_26071a
chr17	21551197	21551647	WT_KDM5B.msd_peak_26071b
chr17	21557569	21557812	WT_KDM5B.msd_peak_26072
chr17	21730652	21731001	WT_KDM5B.msd_peak_26073
chr17	21816201	21816410	WT_KDM5B.msd_peak_26074
chr17	21918369	21918856	WT_KDM5B.msd_peak_26075a
chr17	21918369	21918856	WT_KDM5B.msd_peak_26075b
chr17	21950079	21950279	WT_KDM5B.msd_peak_26076
chr17	21962110	21962442	WT_KDM5B.msd_peak_26077
chr17	22071370	22071590	WT_KDM5B.msd_peak_26078
chr17	22487540	22487740	WT_KDM5B.msd_peak_26079
chr17	22623048	22623319	WT_KDM5B.msd_peak_26080
chr17	22631795	22632061	WT_KDM5B.msd_peak_26081
chr17	22635660	22635979	WT_KDM5B.msd_peak_26082
chr17	22866851	22867114	WT_KDM5B.msd_peak_26083
chr17	22876317	22876801	WT_KDM5B.msd_peak_26084a
chr17	22876317	22876801	WT_KDM5B.msd_peak_26084b
chr17	23315378	23315668	WT_KDM5B.msd_peak_26085
chr17	23432341	23432548	WT_KDM5B.msd_peak_26086
chr17	23448358	23448592	WT_KDM5B.msd_peak_26087
chr17	23515430	23515630	WT_KDM5B.msd_peak_26088
chr17	23546975	23547192	WT_KDM5B.msd_peak_26089
chr17	23557645	23558234	WT_KDM5B.msd_peak_26090
chr17	23575967	23576661	WT_KDM5B.msd_peak_26091a
chr17	23575967	23576661	WT_KDM5B.msd_peak_26091b
chr17	23609671	23609878	WT_KDM5B.msd_peak_26092
chr17	23610281	23610839	WT_KDM5B.msd_peak_26093
chr17	23623944	23624154	WT_KDM5B.msd_peak_26094
chr17	23630351	23630833	WT_KDM5B.msd_peak_26095
chr17	23631050	23631326	WT_KDM5B.msd_peak_26096
chr17	23640074	23640339	WT_KDM5B.msd_peak_26097
chr17	23642141	23642384	WT_KDM5B.msd_peak_26098
chr17	23644650	23644896	WT_KDM5B.msd_peak_26099
chr17	23645202	23645452	WT_KDM5B.msd_peak_26100
chr17	23646896	23647304	WT_KDM5B.msd_peak_26101a
chr17	23646896	23647304	WT_KDM5B.msd_peak_26101b
chr17	23660361	23660586	WT_KDM5B.msd_peak_26102
chr17	23660823	23661073	WT_KDM5B.msd_peak_26103
chr17	23663059	23663375	WT_KDM5B.msd_peak_26104
chr17	23664826	23665139	WT_KDM5B.msd_peak_26105
chr17	23665399	23666156	WT_KDM5B.msd_peak_26106a
chr17	23665399	23666156	WT_KDM5B.msd_peak_26106b
chr17	23666578	23666858	WT_KDM5B.msd_peak_26107
chr17	23667972	23668471	WT_KDM5B.msd_peak_26108
chr17	23668988	23669502	WT_KDM5B.msd_peak_26109a
chr17	23668988	23669502	WT_KDM5B.msd_peak_26109b
chr17	23673942	23674146	WT_KDM5B.msd_peak_26110
chr17	23676477	23676769	WT_KDM5B.msd_peak_26111
chr17	23677251	23677459	WT_KDM5B.msd_peak_26112
chr17	23678933	23679167	WT_KDM5B.msd_peak_26113
chr17	23679367	23679771	WT_KDM5B.msd_peak_26114
chr17	23681078	23681314	WT_KDM5B.msd_peak_26115
chr17	23683348	23683783	WT_KDM5B.msd_peak_26116
chr17	23697334	23697608	WT_KDM5B.msd_peak_26117
chr17	23697861	23698156	WT_KDM5B.msd_peak_26118
chr17	23699300	23700013	WT_KDM5B.msd_peak_26119a
chr17	23699300	23700013	WT_KDM5B.msd_peak_26119b
chr17	23720660	23720893	WT_KDM5B.msd_peak_26120
chr17	23726526	23726848	WT_KDM5B.msd_peak_26121
chr17	23731361	23731763	WT_KDM5B.msd_peak_26122a
chr17	23731361	23731763	WT_KDM5B.msd_peak_26122b
chr17	23732578	23732779	WT_KDM5B.msd_peak_26123
chr17	23733861	23734357	WT_KDM5B.msd_peak_26124
chr17	23737703	23737922	WT_KDM5B.msd_peak_26125
chr17	23739342	23740372	WT_KDM5B.msd_peak_26126a
chr17	23739342	23740372	WT_KDM5B.msd_peak_26126b
chr17	23739342	23740372	WT_KDM5B.msd_peak_26126c
chr17	23740692	23741058	WT_KDM5B.msd_peak_26127
chr17	23741764	23742076	WT_KDM5B.msd_peak_26128
chr17	23742191	23742437	WT_KDM5B.msd_peak_26129
chr17	23742642	23742906	WT_KDM5B.msd_peak_26130
chr17	23744580	23745125	WT_KDM5B.msd_peak_26131a
chr17	23744580	23745125	WT_KDM5B.msd_peak_26131b
chr17	23745686	23746031	WT_KDM5B.msd_peak_26132
chr17	23749729	23749977	WT_KDM5B.msd_peak_26133
chr17	23758792	23758992	WT_KDM5B.msd_peak_26134
chr17	23763132	23763349	WT_KDM5B.msd_peak_26135
chr17	23771056	23771605	WT_KDM5B.msd_peak_26136
chr17	23778428	23779013	WT_KDM5B.msd_peak_26137a
chr17	23778428	23779013	WT_KDM5B.msd_peak_26137b
chr17	23779537	23779754	WT_KDM5B.msd_peak_26138
chr17	23779914	23780153	WT_KDM5B.msd_peak_26139
chr17	23785920	23786203	WT_KDM5B.msd_peak_26140
chr17	23790417	23790734	WT_KDM5B.msd_peak_26141
chr17	23795313	23795572	WT_KDM5B.msd_peak_26142
chr17	23803508	23804045	WT_KDM5B.msd_peak_26143a
chr17	23803508	23804045	WT_KDM5B.msd_peak_26143b
chr17	23806865	23807279	WT_KDM5B.msd_peak_26144
chr17	23815794	23816082	WT_KDM5B.msd_peak_26145
chr17	23819695	23820158	WT_KDM5B.msd_peak_26146a
chr17	23819695	23820158	WT_KDM5B.msd_peak_26146b
chr17	23819695	23820158	WT_KDM5B.msd_peak_26146c
chr17	23823618	23823904	WT_KDM5B.msd_peak_26147
chr17	23828635	23829041	WT_KDM5B.msd_peak_26148
chr17	23833927	23834303	WT_KDM5B.msd_peak_26149
chr17	23834981	23835209	WT_KDM5B.msd_peak_26150
chr17	23843959	23844220	WT_KDM5B.msd_peak_26151
chr17	23854272	23854514	WT_KDM5B.msd_peak_26152
chr17	23860399	23860733	WT_KDM5B.msd_peak_26153
chr17	23885810	23886010	WT_KDM5B.msd_peak_26154
chr17	23898583	23898783	WT_KDM5B.msd_peak_26155
chr17	23924716	23924920	WT_KDM5B.msd_peak_26156
chr17	23971582	23971944	WT_KDM5B.msd_peak_26157
chr17	23993319	23994165	WT_KDM5B.msd_peak_26158a
chr17	23993319	23994165	WT_KDM5B.msd_peak_26158b
chr17	23997298	23997500	WT_KDM5B.msd_peak_26159
chr17	23997890	23998379	WT_KDM5B.msd_peak_26160a
chr17	23997890	23998379	WT_KDM5B.msd_peak_26160b
chr17	24015494	24015969	WT_KDM5B.msd_peak_26161
chr17	24021822	24022073	WT_KDM5B.msd_peak_26162
chr17	24022193	24022494	WT_KDM5B.msd_peak_26163
chr17	24027304	24027649	WT_KDM5B.msd_peak_26164
chr17	24030666	24030919	WT_KDM5B.msd_peak_26165
chr17	24031903	24032389	WT_KDM5B.msd_peak_26166a
chr17	24031903	24032389	WT_KDM5B.msd_peak_26166b
chr17	24037194	24037626	WT_KDM5B.msd_peak_26167
chr17	24048919	24049175	WT_KDM5B.msd_peak_26168
chr17	24050676	24051112	WT_KDM5B.msd_peak_26169
chr17	24058855	24059182	WT_KDM5B.msd_peak_26170
chr17	24066614	24066860	WT_KDM5B.msd_peak_26171
chr17	24073103	24073625	WT_KDM5B.msd_peak_26172
chr17	24110846	24111046	WT_KDM5B.msd_peak_26173
chr17	24135897	24136098	WT_KDM5B.msd_peak_26174
chr17	24141079	24141468	WT_KDM5B.msd_peak_26175
chr17	24151771	24152282	WT_KDM5B.msd_peak_26176
chr17	24163008	24163373	WT_KDM5B.msd_peak_26177
chr17	24164161	24164633	WT_KDM5B.msd_peak_26178a
chr17	24164161	24164633	WT_KDM5B.msd_peak_26178b
chr17	24168683	24169674	WT_KDM5B.msd_peak_26179a
chr17	24168683	24169674	WT_KDM5B.msd_peak_26179b
chr17	24179175	24179416	WT_KDM5B.msd_peak_26180
chr17	24179725	24179970	WT_KDM5B.msd_peak_26181
chr17	24185855	24186064	WT_KDM5B.msd_peak_26182
chr17	24197616	24197833	WT_KDM5B.msd_peak_26183
chr17	24199282	24199517	WT_KDM5B.msd_peak_26184
chr17	24205340	24206125	WT_KDM5B.msd_peak_26185a
chr17	24205340	24206125	WT_KDM5B.msd_peak_26185b
chr17	24206543	24206925	WT_KDM5B.msd_peak_26186a
chr17	24206543	24206925	WT_KDM5B.msd_peak_26186b
chr17	24207775	24208189	WT_KDM5B.msd_peak_26187
chr17	24211984	24212227	WT_KDM5B.msd_peak_26188
chr17	24220491	24220715	WT_KDM5B.msd_peak_26189
chr17	24227866	24228089	WT_KDM5B.msd_peak_26190
chr17	24231273	24231473	WT_KDM5B.msd_peak_26191
chr17	24237073	24237371	WT_KDM5B.msd_peak_26192
chr17	24240302	24240614	WT_KDM5B.msd_peak_26193
chr17	24287537	24287737	WT_KDM5B.msd_peak_26194
chr17	24299998	24300343	WT_KDM5B.msd_peak_26195
chr17	24350944	24351435	WT_KDM5B.msd_peak_26196a
chr17	24350944	24351435	WT_KDM5B.msd_peak_26196b
chr17	24351648	24351898	WT_KDM5B.msd_peak_26197
chr17	24352098	24352662	WT_KDM5B.msd_peak_26198
chr17	24360889	24361091	WT_KDM5B.msd_peak_26199
chr17	24381941	24382264	WT_KDM5B.msd_peak_26200
chr17	24399778	24400183	WT_KDM5B.msd_peak_26201
chr17	24400289	24400493	WT_KDM5B.msd_peak_26202
chr17	24408370	24408668	WT_KDM5B.msd_peak_26203
chr17	24414830	24415194	WT_KDM5B.msd_peak_26204
chr17	24420175	24420417	WT_KDM5B.msd_peak_26205
chr17	24426701	24426925	WT_KDM5B.msd_peak_26206
chr17	24431775	24431995	WT_KDM5B.msd_peak_26207
chr17	24442183	24442505	WT_KDM5B.msd_peak_26208
chr17	24444109	24444338	WT_KDM5B.msd_peak_26209
chr17	24444596	24444851	WT_KDM5B.msd_peak_26210
chr17	24454873	24455226	WT_KDM5B.msd_peak_26211
chr17	24466351	24466603	WT_KDM5B.msd_peak_26212
chr17	24470459	24471390	WT_KDM5B.msd_peak_26213a
chr17	24470459	24471390	WT_KDM5B.msd_peak_26213b
chr17	24470459	24471390	WT_KDM5B.msd_peak_26213c
chr17	24474060	24474266	WT_KDM5B.msd_peak_26214
chr17	24474506	24474725	WT_KDM5B.msd_peak_26215
chr17	24488347	24488570	WT_KDM5B.msd_peak_26216a
chr17	24488347	24488570	WT_KDM5B.msd_peak_26216b
chr17	24488855	24489159	WT_KDM5B.msd_peak_26217
chr17	24489438	24489718	WT_KDM5B.msd_peak_26218
chr17	24504190	24505001	WT_KDM5B.msd_peak_26219a
chr17	24504190	24505001	WT_KDM5B.msd_peak_26219b
chr17	24504190	24505001	WT_KDM5B.msd_peak_26219c
chr17	24506553	24506811	WT_KDM5B.msd_peak_26220
chr17	24507102	24507677	WT_KDM5B.msd_peak_26221a
chr17	24507102	24507677	WT_KDM5B.msd_peak_26221b
chr17	24512905	24513371	WT_KDM5B.msd_peak_26222a
chr17	24512905	24513371	WT_KDM5B.msd_peak_26222b
chr17	24514173	24514481	WT_KDM5B.msd_peak_26223
chr17	24521636	24521858	WT_KDM5B.msd_peak_26224
chr17	24529775	24530263	WT_KDM5B.msd_peak_26225
chr17	24533175	24533905	WT_KDM5B.msd_peak_26226a
chr17	24533175	24533905	WT_KDM5B.msd_peak_26226b
chr17	24533175	24533905	WT_KDM5B.msd_peak_26226c
chr17	24544598	24545226	WT_KDM5B.msd_peak_26227a
chr17	24544598	24545226	WT_KDM5B.msd_peak_26227b
chr17	24544598	24545226	WT_KDM5B.msd_peak_26227c
chr17	24548866	24549079	WT_KDM5B.msd_peak_26228
chr17	24550466	24550784	WT_KDM5B.msd_peak_26229
chr17	24559140	24559469	WT_KDM5B.msd_peak_26230
chr17	24565074	24565490	WT_KDM5B.msd_peak_26231
chr17	24565845	24566101	WT_KDM5B.msd_peak_26232
chr17	24569841	24570101	WT_KDM5B.msd_peak_26233
chr17	24590716	24590980	WT_KDM5B.msd_peak_26234
chr17	24594497	24595225	WT_KDM5B.msd_peak_26235a
chr17	24594497	24595225	WT_KDM5B.msd_peak_26235b
chr17	24596937	24597306	WT_KDM5B.msd_peak_26236
chr17	24601378	24601824	WT_KDM5B.msd_peak_26237
chr17	24602382	24602582	WT_KDM5B.msd_peak_26238
chr17	24602987	24603224	WT_KDM5B.msd_peak_26239
chr17	24604330	24604554	WT_KDM5B.msd_peak_26240
chr17	24605755	24606139	WT_KDM5B.msd_peak_26241
chr17	24608960	24609160	WT_KDM5B.msd_peak_26242
chr17	24614371	24614803	WT_KDM5B.msd_peak_26243a
chr17	24614371	24614803	WT_KDM5B.msd_peak_26243b
chr17	24615247	24615632	WT_KDM5B.msd_peak_26244
chr17	24618646	24618912	WT_KDM5B.msd_peak_26245
chr17	24624856	24625354	WT_KDM5B.msd_peak_26246
chr17	24632359	24632569	WT_KDM5B.msd_peak_26247
chr17	24639341	24639661	WT_KDM5B.msd_peak_26248
chr17	24645499	24645797	WT_KDM5B.msd_peak_26249
chr17	24647536	24647880	WT_KDM5B.msd_peak_26250
chr17	24649667	24650262	WT_KDM5B.msd_peak_26251
chr17	24658010	24658313	WT_KDM5B.msd_peak_26252
chr17	24669856	24670214	WT_KDM5B.msd_peak_26253
chr17	24676997	24677233	WT_KDM5B.msd_peak_26254
chr17	24678453	24678670	WT_KDM5B.msd_peak_26255
chr17	24680507	24680825	WT_KDM5B.msd_peak_26256
chr17	24681315	24681603	WT_KDM5B.msd_peak_26257
chr17	24686436	24686677	WT_KDM5B.msd_peak_26258
chr17	24687297	24687681	WT_KDM5B.msd_peak_26259
chr17	24689810	24690064	WT_KDM5B.msd_peak_26260
chr17	24695132	24695478	WT_KDM5B.msd_peak_26261
chr17	24695670	24696061	WT_KDM5B.msd_peak_26262
chr17	24696316	24696689	WT_KDM5B.msd_peak_26263
chr17	24699805	24700285	WT_KDM5B.msd_peak_26264
chr17	24704216	24704818	WT_KDM5B.msd_peak_26265a
chr17	24704216	24704818	WT_KDM5B.msd_peak_26265b
chr17	24716264	24716630	WT_KDM5B.msd_peak_26266
chr17	24719548	24719817	WT_KDM5B.msd_peak_26267
chr17	24720214	24720763	WT_KDM5B.msd_peak_26268
chr17	24721018	24721247	WT_KDM5B.msd_peak_26269
chr17	24724037	24724347	WT_KDM5B.msd_peak_26270
chr17	24752518	24752746	WT_KDM5B.msd_peak_26271
chr17	24752979	24753550	WT_KDM5B.msd_peak_26272a
chr17	24752979	24753550	WT_KDM5B.msd_peak_26272b
chr17	24758003	24758311	WT_KDM5B.msd_peak_26273
chr17	24759060	24759333	WT_KDM5B.msd_peak_26274
chr17	24762070	24762323	WT_KDM5B.msd_peak_26275
chr17	24792315	24792526	WT_KDM5B.msd_peak_26276
chr17	24804007	24804962	WT_KDM5B.msd_peak_26277a
chr17	24804007	24804962	WT_KDM5B.msd_peak_26277b
chr17	24804007	24804962	WT_KDM5B.msd_peak_26277c
chr17	24813378	24813692	WT_KDM5B.msd_peak_26278
chr17	24849743	24849996	WT_KDM5B.msd_peak_26279
chr17	24850586	24850918	WT_KDM5B.msd_peak_26280
chr17	24853398	24853763	WT_KDM5B.msd_peak_26281
chr17	24855426	24855675	WT_KDM5B.msd_peak_26282
chr17	24856147	24856406	WT_KDM5B.msd_peak_26283
chr17	24856637	24856965	WT_KDM5B.msd_peak_26284
chr17	24864790	24865041	WT_KDM5B.msd_peak_26285
chr17	24866678	24866921	WT_KDM5B.msd_peak_26286
chr17	24877782	24877982	WT_KDM5B.msd_peak_26287
chr17	24878536	24878775	WT_KDM5B.msd_peak_26288
chr17	24880378	24880578	WT_KDM5B.msd_peak_26289
chr17	24881080	24881785	WT_KDM5B.msd_peak_26290a
chr17	24881080	24881785	WT_KDM5B.msd_peak_26290b
chr17	24881080	24881785	WT_KDM5B.msd_peak_26290c
chr17	24882071	24882393	WT_KDM5B.msd_peak_26291
chr17	24885459	24885923	WT_KDM5B.msd_peak_26292
chr17	24886672	24887065	WT_KDM5B.msd_peak_26293
chr17	24887314	24888010	WT_KDM5B.msd_peak_26294
chr17	24890757	24891060	WT_KDM5B.msd_peak_26295
chr17	24891445	24891747	WT_KDM5B.msd_peak_26296
chr17	24894524	24895012	WT_KDM5B.msd_peak_26297
chr17	24895194	24895567	WT_KDM5B.msd_peak_26298
chr17	24895827	24896077	WT_KDM5B.msd_peak_26299
chr17	24896275	24896856	WT_KDM5B.msd_peak_26300
chr17	24896984	24897267	WT_KDM5B.msd_peak_26301
chr17	24897643	24898047	WT_KDM5B.msd_peak_26302a
chr17	24897643	24898047	WT_KDM5B.msd_peak_26302b
chr17	24901329	24901634	WT_KDM5B.msd_peak_26303
chr17	24914491	24914691	WT_KDM5B.msd_peak_26304
chr17	24936365	24936947	WT_KDM5B.msd_peak_26305
chr17	24960307	24960614	WT_KDM5B.msd_peak_26306
chr17	24967901	24968101	WT_KDM5B.msd_peak_26307
chr17	24982773	24983044	WT_KDM5B.msd_peak_26308
chr17	25013569	25014540	WT_KDM5B.msd_peak_26309a
chr17	25013569	25014540	WT_KDM5B.msd_peak_26309b
chr17	25015212	25015751	WT_KDM5B.msd_peak_26310a
chr17	25015212	25015751	WT_KDM5B.msd_peak_26310b
chr17	25016338	25016790	WT_KDM5B.msd_peak_26311
chr17	25057243	25057443	WT_KDM5B.msd_peak_26312
chr17	25071944	25072144	WT_KDM5B.msd_peak_26313
chr17	25078097	25078363	WT_KDM5B.msd_peak_26314
chr17	25080437	25081019	WT_KDM5B.msd_peak_26315a
chr17	25080437	25081019	WT_KDM5B.msd_peak_26315b
chr17	25086822	25087022	WT_KDM5B.msd_peak_26316
chr17	25087493	25087698	WT_KDM5B.msd_peak_26317
chr17	25088834	25089064	WT_KDM5B.msd_peak_26318
chr17	25097000	25097287	WT_KDM5B.msd_peak_26319
chr17	25107074	25107300	WT_KDM5B.msd_peak_26320
chr17	25109413	25109674	WT_KDM5B.msd_peak_26321
chr17	25110108	25110317	WT_KDM5B.msd_peak_26322
chr17	25111568	25111811	WT_KDM5B.msd_peak_26323
chr17	25114381	25114617	WT_KDM5B.msd_peak_26324
chr17	25115399	25115854	WT_KDM5B.msd_peak_26325
chr17	25122943	25123233	WT_KDM5B.msd_peak_26326
chr17	25124494	25124715	WT_KDM5B.msd_peak_26327
chr17	25124820	25125161	WT_KDM5B.msd_peak_26328
chr17	25136266	25136468	WT_KDM5B.msd_peak_26329
chr17	25141000	25141208	WT_KDM5B.msd_peak_26330
chr17	25144194	25144550	WT_KDM5B.msd_peak_26331
chr17	25148692	25148946	WT_KDM5B.msd_peak_26332
chr17	25168330	25168560	WT_KDM5B.msd_peak_26333
chr17	25175406	25175673	WT_KDM5B.msd_peak_26334
chr17	25184103	25184379	WT_KDM5B.msd_peak_26335a
chr17	25184103	25184379	WT_KDM5B.msd_peak_26335b
chr17	25184633	25185055	WT_KDM5B.msd_peak_26336
chr17	25188497	25188974	WT_KDM5B.msd_peak_26337
chr17	25189337	25189672	WT_KDM5B.msd_peak_26338
chr17	25200992	25201269	WT_KDM5B.msd_peak_26339
chr17	25218603	25218818	WT_KDM5B.msd_peak_26340
chr17	25226501	25226711	WT_KDM5B.msd_peak_26341
chr17	25235477	25235692	WT_KDM5B.msd_peak_26342
chr17	25239713	25240101	WT_KDM5B.msd_peak_26343
chr17	25240218	25240699	WT_KDM5B.msd_peak_26344a
chr17	25240218	25240699	WT_KDM5B.msd_peak_26344b
chr17	25241108	25241309	WT_KDM5B.msd_peak_26345
chr17	25242841	25243124	WT_KDM5B.msd_peak_26346
chr17	25243903	25244355	WT_KDM5B.msd_peak_26347
chr17	25253829	25254084	WT_KDM5B.msd_peak_26348
chr17	25255930	25256561	WT_KDM5B.msd_peak_26349a
chr17	25255930	25256561	WT_KDM5B.msd_peak_26349b
chr17	25262490	25262891	WT_KDM5B.msd_peak_26350
chr17	25272977	25273706	WT_KDM5B.msd_peak_26351a
chr17	25272977	25273706	WT_KDM5B.msd_peak_26351b
chr17	25334057	25334257	WT_KDM5B.msd_peak_26352
chr17	25391009	25391606	WT_KDM5B.msd_peak_26353a
chr17	25391009	25391606	WT_KDM5B.msd_peak_26353b
chr17	25391890	25392465	WT_KDM5B.msd_peak_26354a
chr17	25391890	25392465	WT_KDM5B.msd_peak_26354b
chr17	25432679	25433196	WT_KDM5B.msd_peak_26355a
chr17	25432679	25433196	WT_KDM5B.msd_peak_26355b
chr17	25433942	25434393	WT_KDM5B.msd_peak_26356
chr17	25451745	25451982	WT_KDM5B.msd_peak_26357
chr17	25474495	25474891	WT_KDM5B.msd_peak_26358
chr17	25475496	25475719	WT_KDM5B.msd_peak_26359
chr17	25508026	25508226	WT_KDM5B.msd_peak_26360
chr17	25519563	25519811	WT_KDM5B.msd_peak_26361
chr17	25547869	25548177	WT_KDM5B.msd_peak_26362
chr17	25548929	25549334	WT_KDM5B.msd_peak_26363a
chr17	25548929	25549334	WT_KDM5B.msd_peak_26363b
chr17	25556678	25557051	WT_KDM5B.msd_peak_26364
chr17	25560276	25560760	WT_KDM5B.msd_peak_26365
chr17	25561674	25561874	WT_KDM5B.msd_peak_26366
chr17	25567272	25567828	WT_KDM5B.msd_peak_26367
chr17	25570217	25570620	WT_KDM5B.msd_peak_26368
chr17	25570725	25570962	WT_KDM5B.msd_peak_26369
chr17	25579525	25579916	WT_KDM5B.msd_peak_26370
chr17	25611017	25611244	WT_KDM5B.msd_peak_26371
chr17	25623911	25624168	WT_KDM5B.msd_peak_26372
chr17	25656937	25657138	WT_KDM5B.msd_peak_26373
chr17	25658952	25659565	WT_KDM5B.msd_peak_26374a
chr17	25658952	25659565	WT_KDM5B.msd_peak_26374b
chr17	25690647	25690878	WT_KDM5B.msd_peak_26375
chr17	25699892	25700190	WT_KDM5B.msd_peak_26376
chr17	25723163	25723411	WT_KDM5B.msd_peak_26377
chr17	25723534	25723815	WT_KDM5B.msd_peak_26378
chr17	25726947	25727407	WT_KDM5B.msd_peak_26379
chr17	25728030	25728875	WT_KDM5B.msd_peak_26380a
chr17	25728030	25728875	WT_KDM5B.msd_peak_26380b
chr17	25731018	25731422	WT_KDM5B.msd_peak_26381
chr17	25731812	25732220	WT_KDM5B.msd_peak_26382
chr17	25735213	25735575	WT_KDM5B.msd_peak_26383
chr17	25742906	25743125	WT_KDM5B.msd_peak_26384
chr17	25744519	25744826	WT_KDM5B.msd_peak_26385
chr17	25756552	25756777	WT_KDM5B.msd_peak_26386
chr17	25773848	25774048	WT_KDM5B.msd_peak_26387
chr17	25776638	25777213	WT_KDM5B.msd_peak_26388a
chr17	25776638	25777213	WT_KDM5B.msd_peak_26388b
chr17	25777973	25778213	WT_KDM5B.msd_peak_26389a
chr17	25777973	25778213	WT_KDM5B.msd_peak_26389b
chr17	25778951	25779186	WT_KDM5B.msd_peak_26390
chr17	25782984	25783567	WT_KDM5B.msd_peak_26391a
chr17	25782984	25783567	WT_KDM5B.msd_peak_26391b
chr17	25787697	25788135	WT_KDM5B.msd_peak_26392
chr17	25789789	25790026	WT_KDM5B.msd_peak_26393
chr17	25791999	25792325	WT_KDM5B.msd_peak_26394
chr17	25794962	25795454	WT_KDM5B.msd_peak_26395a
chr17	25794962	25795454	WT_KDM5B.msd_peak_26395b
chr17	25796250	25796702	WT_KDM5B.msd_peak_26396a
chr17	25796250	25796702	WT_KDM5B.msd_peak_26396b
chr17	25808655	25808861	WT_KDM5B.msd_peak_26397
chr17	25809097	25809777	WT_KDM5B.msd_peak_26398a
chr17	25809097	25809777	WT_KDM5B.msd_peak_26398b
chr17	25811222	25811426	WT_KDM5B.msd_peak_26399
chr17	25817874	25818212	WT_KDM5B.msd_peak_26400a
chr17	25817874	25818212	WT_KDM5B.msd_peak_26400b
chr17	25819270	25820203	WT_KDM5B.msd_peak_26401a
chr17	25819270	25820203	WT_KDM5B.msd_peak_26401b
chr17	25819270	25820203	WT_KDM5B.msd_peak_26401c
chr17	25824189	25824450	WT_KDM5B.msd_peak_26402
chr17	25825465	25826346	WT_KDM5B.msd_peak_26403a
chr17	25825465	25826346	WT_KDM5B.msd_peak_26403b
chr17	25827053	25827375	WT_KDM5B.msd_peak_26404
chr17	25828170	25828626	WT_KDM5B.msd_peak_26405
chr17	25829007	25829242	WT_KDM5B.msd_peak_26406
chr17	25830812	25831050	WT_KDM5B.msd_peak_26407
chr17	25832638	25832900	WT_KDM5B.msd_peak_26408
chr17	25833898	25834189	WT_KDM5B.msd_peak_26409
chr17	25834869	25835235	WT_KDM5B.msd_peak_26410
chr17	25840347	25840604	WT_KDM5B.msd_peak_26411
chr17	25841471	25841673	WT_KDM5B.msd_peak_26412
chr17	25846129	25846700	WT_KDM5B.msd_peak_26413a
chr17	25846129	25846700	WT_KDM5B.msd_peak_26413b
chr17	25851327	25851562	WT_KDM5B.msd_peak_26414
chr17	25853603	25854184	WT_KDM5B.msd_peak_26415a
chr17	25853603	25854184	WT_KDM5B.msd_peak_26415b
chr17	25856940	25857214	WT_KDM5B.msd_peak_26416
chr17	25861241	25861441	WT_KDM5B.msd_peak_26417
chr17	25861577	25861892	WT_KDM5B.msd_peak_26418
chr17	25863703	25863907	WT_KDM5B.msd_peak_26419
chr17	25864320	25864705	WT_KDM5B.msd_peak_26420
chr17	25867980	25868727	WT_KDM5B.msd_peak_26421a
chr17	25867980	25868727	WT_KDM5B.msd_peak_26421b
chr17	25875551	25876282	WT_KDM5B.msd_peak_26422a
chr17	25875551	25876282	WT_KDM5B.msd_peak_26422b
chr17	25877691	25878148	WT_KDM5B.msd_peak_26423
chr17	25878329	25878568	WT_KDM5B.msd_peak_26424
chr17	25879817	25880071	WT_KDM5B.msd_peak_26425
chr17	25883411	25883807	WT_KDM5B.msd_peak_26426
chr17	25892746	25893041	WT_KDM5B.msd_peak_26427
chr17	25905720	25905935	WT_KDM5B.msd_peak_26428
chr17	25919059	25919677	WT_KDM5B.msd_peak_26429a
chr17	25919059	25919677	WT_KDM5B.msd_peak_26429b
chr17	25920662	25920957	WT_KDM5B.msd_peak_26430
chr17	25932468	25932799	WT_KDM5B.msd_peak_26431
chr17	25943600	25943810	WT_KDM5B.msd_peak_26432
chr17	25944021	25944286	WT_KDM5B.msd_peak_26433
chr17	25945330	25945545	WT_KDM5B.msd_peak_26434
chr17	25945721	25945967	WT_KDM5B.msd_peak_26435
chr17	25946852	25947189	WT_KDM5B.msd_peak_26436
chr17	25948112	25948373	WT_KDM5B.msd_peak_26437
chr17	25951156	25952266	WT_KDM5B.msd_peak_26438a
chr17	25951156	25952266	WT_KDM5B.msd_peak_26438b
chr17	25951156	25952266	WT_KDM5B.msd_peak_26438c
chr17	25956206	25956484	WT_KDM5B.msd_peak_26439
chr17	25957591	25957890	WT_KDM5B.msd_peak_26440
chr17	25959807	25960516	WT_KDM5B.msd_peak_26441a
chr17	25959807	25960516	WT_KDM5B.msd_peak_26441b
chr17	25963173	25963448	WT_KDM5B.msd_peak_26442
chr17	25964080	25964465	WT_KDM5B.msd_peak_26443
chr17	25985271	25985677	WT_KDM5B.msd_peak_26444
chr17	25991199	25991404	WT_KDM5B.msd_peak_26445
chr17	25991797	25992026	WT_KDM5B.msd_peak_26446
chr17	25997709	25997994	WT_KDM5B.msd_peak_26447
chr17	25998569	25998794	WT_KDM5B.msd_peak_26448
chr17	26006983	26007292	WT_KDM5B.msd_peak_26449
chr17	26008902	26009130	WT_KDM5B.msd_peak_26450
chr17	26011802	26012121	WT_KDM5B.msd_peak_26451a
chr17	26011802	26012121	WT_KDM5B.msd_peak_26451b
chr17	26013792	26013992	WT_KDM5B.msd_peak_26452
chr17	26015818	26016079	WT_KDM5B.msd_peak_26453
chr17	26024214	26024425	WT_KDM5B.msd_peak_26454
chr17	26029318	26029574	WT_KDM5B.msd_peak_26455
chr17	26037532	26037792	WT_KDM5B.msd_peak_26456
chr17	26047970	26048182	WT_KDM5B.msd_peak_26457
chr17	26056354	26056583	WT_KDM5B.msd_peak_26458
chr17	26064300	26064522	WT_KDM5B.msd_peak_26459
chr17	26067977	26068191	WT_KDM5B.msd_peak_26460
chr17	26068331	26069446	WT_KDM5B.msd_peak_26461a
chr17	26068331	26069446	WT_KDM5B.msd_peak_26461b
chr17	26068331	26069446	WT_KDM5B.msd_peak_26461c
chr17	26068331	26069446	WT_KDM5B.msd_peak_26461d
chr17	26093582	26093782	WT_KDM5B.msd_peak_26462
chr17	26095177	26095520	WT_KDM5B.msd_peak_26463
chr17	26098405	26098625	WT_KDM5B.msd_peak_26464
chr17	26113217	26113791	WT_KDM5B.msd_peak_26465a
chr17	26113217	26113791	WT_KDM5B.msd_peak_26465b
chr17	26120488	26120751	WT_KDM5B.msd_peak_26466
chr17	26121326	26121577	WT_KDM5B.msd_peak_26467
chr17	26122693	26122948	WT_KDM5B.msd_peak_26468
chr17	26125303	26125525	WT_KDM5B.msd_peak_26469
chr17	26126154	26126490	WT_KDM5B.msd_peak_26470
chr17	26126735	26126958	WT_KDM5B.msd_peak_26471
chr17	26131129	26131456	WT_KDM5B.msd_peak_26472
chr17	26132752	26132958	WT_KDM5B.msd_peak_26473
chr17	26137191	26137427	WT_KDM5B.msd_peak_26474
chr17	26145840	26146060	WT_KDM5B.msd_peak_26475
chr17	26188161	26188369	WT_KDM5B.msd_peak_26476
chr17	26198133	26198348	WT_KDM5B.msd_peak_26477
chr17	26202888	26203095	WT_KDM5B.msd_peak_26478
chr17	26203302	26203739	WT_KDM5B.msd_peak_26479
chr17	26204886	26205086	WT_KDM5B.msd_peak_26480
chr17	26207371	26207664	WT_KDM5B.msd_peak_26481
chr17	26207906	26208112	WT_KDM5B.msd_peak_26482
chr17	26222609	26222809	WT_KDM5B.msd_peak_26483
chr17	26231645	26231921	WT_KDM5B.msd_peak_26484
chr17	26240918	26241122	WT_KDM5B.msd_peak_26485
chr17	26243735	26244132	WT_KDM5B.msd_peak_26486
chr17	26253038	26253495	WT_KDM5B.msd_peak_26487
chr17	26275963	26276181	WT_KDM5B.msd_peak_26488
chr17	26364789	26365009	WT_KDM5B.msd_peak_26489
chr17	26394728	26395115	WT_KDM5B.msd_peak_26490
chr17	26414998	26415583	WT_KDM5B.msd_peak_26491a
chr17	26414998	26415583	WT_KDM5B.msd_peak_26491b
chr17	26431813	26432216	WT_KDM5B.msd_peak_26492
chr17	26439073	26439345	WT_KDM5B.msd_peak_26493
chr17	26478393	26478881	WT_KDM5B.msd_peak_26494a
chr17	26478393	26478881	WT_KDM5B.msd_peak_26494b
chr17	26482262	26482531	WT_KDM5B.msd_peak_26495
chr17	26502910	26503135	WT_KDM5B.msd_peak_26496
chr17	26507516	26508393	WT_KDM5B.msd_peak_26497a
chr17	26507516	26508393	WT_KDM5B.msd_peak_26497b
chr17	26507516	26508393	WT_KDM5B.msd_peak_26497c
chr17	26542815	26543040	WT_KDM5B.msd_peak_26498
chr17	26543247	26543499	WT_KDM5B.msd_peak_26499
chr17	26561670	26562092	WT_KDM5B.msd_peak_26500a
chr17	26561670	26562092	WT_KDM5B.msd_peak_26500b
chr17	26583217	26583551	WT_KDM5B.msd_peak_26501
chr17	26597176	26597405	WT_KDM5B.msd_peak_26502
chr17	26602286	26602552	WT_KDM5B.msd_peak_26503
chr17	26612278	26612503	WT_KDM5B.msd_peak_26504
chr17	26618286	26618546	WT_KDM5B.msd_peak_26505
chr17	26621221	26621654	WT_KDM5B.msd_peak_26506a
chr17	26621221	26621654	WT_KDM5B.msd_peak_26506b
chr17	26629905	26630105	WT_KDM5B.msd_peak_26507
chr17	26640539	26640791	WT_KDM5B.msd_peak_26508
chr17	26649418	26649645	WT_KDM5B.msd_peak_26509
chr17	26683257	26683492	WT_KDM5B.msd_peak_26510
chr17	26715689	26716218	WT_KDM5B.msd_peak_26511
chr17	26838836	26839233	WT_KDM5B.msd_peak_26512
chr17	26839361	26839561	WT_KDM5B.msd_peak_26513a
chr17	26839361	26839561	WT_KDM5B.msd_peak_26513b
chr17	26844628	26844832	WT_KDM5B.msd_peak_26514
chr17	26868722	26869102	WT_KDM5B.msd_peak_26515
chr17	26917159	26917507	WT_KDM5B.msd_peak_26516
chr17	26923260	26923665	WT_KDM5B.msd_peak_26517
chr17	26924274	26924872	WT_KDM5B.msd_peak_26518
chr17	26925388	26925770	WT_KDM5B.msd_peak_26519a
chr17	26925388	26925770	WT_KDM5B.msd_peak_26519b
chr17	26932675	26933707	WT_KDM5B.msd_peak_26520a
chr17	26932675	26933707	WT_KDM5B.msd_peak_26520b
chr17	26937350	26937608	WT_KDM5B.msd_peak_26521
chr17	26938794	26939080	WT_KDM5B.msd_peak_26522
chr17	26946700	26947006	WT_KDM5B.msd_peak_26523
chr17	26949027	26949402	WT_KDM5B.msd_peak_26524
chr17	26966925	26967145	WT_KDM5B.msd_peak_26525
chr17	26972642	26973011	WT_KDM5B.msd_peak_26526
chr17	26973205	26973416	WT_KDM5B.msd_peak_26527
chr17	26974649	26974996	WT_KDM5B.msd_peak_26528a
chr17	26974649	26974996	WT_KDM5B.msd_peak_26528b
chr17	26993973	26994181	WT_KDM5B.msd_peak_26529
chr17	27022678	27022878	WT_KDM5B.msd_peak_26530
chr17	27023469	27023755	WT_KDM5B.msd_peak_26531
chr17	27027873	27028566	WT_KDM5B.msd_peak_26532a
chr17	27027873	27028566	WT_KDM5B.msd_peak_26532b
chr17	27029415	27029994	WT_KDM5B.msd_peak_26533a
chr17	27029415	27029994	WT_KDM5B.msd_peak_26533b
chr17	27029415	27029994	WT_KDM5B.msd_peak_26533c
chr17	27030630	27030892	WT_KDM5B.msd_peak_26534
chr17	27035179	27035560	WT_KDM5B.msd_peak_26535
chr17	27037157	27037434	WT_KDM5B.msd_peak_26536a
chr17	27037157	27037434	WT_KDM5B.msd_peak_26536b
chr17	27038835	27039537	WT_KDM5B.msd_peak_26537a
chr17	27038835	27039537	WT_KDM5B.msd_peak_26537b
chr17	27040101	27040432	WT_KDM5B.msd_peak_26538
chr17	27044931	27045269	WT_KDM5B.msd_peak_26539
chr17	27050722	27050990	WT_KDM5B.msd_peak_26540
chr17	27053613	27053813	WT_KDM5B.msd_peak_26541
chr17	27056936	27057170	WT_KDM5B.msd_peak_26542
chr17	27057318	27057518	WT_KDM5B.msd_peak_26543
chr17	27063202	27063546	WT_KDM5B.msd_peak_26544
chr17	27066871	27067159	WT_KDM5B.msd_peak_26545
chr17	27069329	27069529	WT_KDM5B.msd_peak_26546
chr17	27073691	27074020	WT_KDM5B.msd_peak_26547
chr17	27075229	27075533	WT_KDM5B.msd_peak_26548
chr17	27077342	27077773	WT_KDM5B.msd_peak_26549a
chr17	27077342	27077773	WT_KDM5B.msd_peak_26549b
chr17	27084203	27084611	WT_KDM5B.msd_peak_26550
chr17	27084908	27085270	WT_KDM5B.msd_peak_26551
chr17	27086463	27086945	WT_KDM5B.msd_peak_26552
chr17	27087206	27088118	WT_KDM5B.msd_peak_26553a
chr17	27087206	27088118	WT_KDM5B.msd_peak_26553b
chr17	27087206	27088118	WT_KDM5B.msd_peak_26553c
chr17	27089856	27090322	WT_KDM5B.msd_peak_26554
chr17	27091224	27091828	WT_KDM5B.msd_peak_26555a
chr17	27091224	27091828	WT_KDM5B.msd_peak_26555b
chr17	27092073	27092375	WT_KDM5B.msd_peak_26556
chr17	27097911	27098216	WT_KDM5B.msd_peak_26557
chr17	27101620	27101839	WT_KDM5B.msd_peak_26558
chr17	27107215	27107522	WT_KDM5B.msd_peak_26559
chr17	27110394	27110598	WT_KDM5B.msd_peak_26560
chr17	27111355	27111644	WT_KDM5B.msd_peak_26561
chr17	27113822	27114074	WT_KDM5B.msd_peak_26562
chr17	27117352	27117717	WT_KDM5B.msd_peak_26563a
chr17	27117352	27117717	WT_KDM5B.msd_peak_26563b
chr17	27119999	27120304	WT_KDM5B.msd_peak_26564
chr17	27120647	27121035	WT_KDM5B.msd_peak_26565
chr17	27121235	27121437	WT_KDM5B.msd_peak_26566
chr17	27121789	27122309	WT_KDM5B.msd_peak_26567a
chr17	27121789	27122309	WT_KDM5B.msd_peak_26567b
chr17	27123935	27124331	WT_KDM5B.msd_peak_26568a
chr17	27123935	27124331	WT_KDM5B.msd_peak_26568b
chr17	27128414	27128724	WT_KDM5B.msd_peak_26569
chr17	27130597	27130807	WT_KDM5B.msd_peak_26570
chr17	27133498	27133843	WT_KDM5B.msd_peak_26571
chr17	27134897	27135111	WT_KDM5B.msd_peak_26572
chr17	27138513	27138713	WT_KDM5B.msd_peak_26573
chr17	27139609	27139809	WT_KDM5B.msd_peak_26574
chr17	27145029	27145229	WT_KDM5B.msd_peak_26575
chr17	27147729	27147968	WT_KDM5B.msd_peak_26576
chr17	27150987	27151264	WT_KDM5B.msd_peak_26577
chr17	27155082	27155282	WT_KDM5B.msd_peak_26578
chr17	27156005	27156266	WT_KDM5B.msd_peak_26579
chr17	27158651	27158896	WT_KDM5B.msd_peak_26580
chr17	27175502	27175718	WT_KDM5B.msd_peak_26581
chr17	27179961	27180218	WT_KDM5B.msd_peak_26582
chr17	27181205	27181499	WT_KDM5B.msd_peak_26583
chr17	27181612	27182034	WT_KDM5B.msd_peak_26584
chr17	27182443	27182643	WT_KDM5B.msd_peak_26585
chr17	27183713	27184057	WT_KDM5B.msd_peak_26586
chr17	27187998	27188205	WT_KDM5B.msd_peak_26587
chr17	27188919	27189778	WT_KDM5B.msd_peak_26588a
chr17	27188919	27189778	WT_KDM5B.msd_peak_26588b
chr17	27188919	27189778	WT_KDM5B.msd_peak_26588c
chr17	27189951	27190233	WT_KDM5B.msd_peak_26589
chr17	27194410	27194633	WT_KDM5B.msd_peak_26590
chr17	27195133	27195531	WT_KDM5B.msd_peak_26591
chr17	27196844	27197263	WT_KDM5B.msd_peak_26592
chr17	27197521	27197827	WT_KDM5B.msd_peak_26593
chr17	27198903	27199481	WT_KDM5B.msd_peak_26594a
chr17	27198903	27199481	WT_KDM5B.msd_peak_26594b
chr17	27199632	27200426	WT_KDM5B.msd_peak_26595a
chr17	27199632	27200426	WT_KDM5B.msd_peak_26595b
chr17	27203322	27203842	WT_KDM5B.msd_peak_26596
chr17	27240602	27240917	WT_KDM5B.msd_peak_26597
chr17	27241326	27241535	WT_KDM5B.msd_peak_26598
chr17	27242442	27242703	WT_KDM5B.msd_peak_26599
chr17	27245244	27245455	WT_KDM5B.msd_peak_26600
chr17	27246232	27246499	WT_KDM5B.msd_peak_26601
chr17	27248014	27248214	WT_KDM5B.msd_peak_26602
chr17	27253001	27253373	WT_KDM5B.msd_peak_26603a
chr17	27253001	27253373	WT_KDM5B.msd_peak_26603b
chr17	27256148	27256502	WT_KDM5B.msd_peak_26604
chr17	27256779	27256979	WT_KDM5B.msd_peak_26605
chr17	27264845	27265255	WT_KDM5B.msd_peak_26606
chr17	27269527	27269900	WT_KDM5B.msd_peak_26607
chr17	27289975	27290535	WT_KDM5B.msd_peak_26608a
chr17	27289975	27290535	WT_KDM5B.msd_peak_26608b
chr17	27291889	27292089	WT_KDM5B.msd_peak_26609
chr17	27293395	27293861	WT_KDM5B.msd_peak_26610
chr17	27303969	27304385	WT_KDM5B.msd_peak_26611
chr17	27305226	27305551	WT_KDM5B.msd_peak_26612
chr17	27310062	27310268	WT_KDM5B.msd_peak_26613
chr17	27314924	27315211	WT_KDM5B.msd_peak_26614
chr17	27315438	27315720	WT_KDM5B.msd_peak_26615
chr17	27316213	27316440	WT_KDM5B.msd_peak_26616
chr17	27325044	27325397	WT_KDM5B.msd_peak_26617
chr17	27333590	27333815	WT_KDM5B.msd_peak_26618
chr17	27335044	27335364	WT_KDM5B.msd_peak_26619
chr17	27336499	27336807	WT_KDM5B.msd_peak_26620
chr17	27345421	27345726	WT_KDM5B.msd_peak_26621
chr17	27346221	27346505	WT_KDM5B.msd_peak_26622
chr17	27350096	27350359	WT_KDM5B.msd_peak_26623
chr17	27354444	27354706	WT_KDM5B.msd_peak_26624
chr17	27365970	27366268	WT_KDM5B.msd_peak_26625
chr17	27370891	27371160	WT_KDM5B.msd_peak_26626
chr17	27375163	27375492	WT_KDM5B.msd_peak_26627
chr17	27378051	27378332	WT_KDM5B.msd_peak_26628
chr17	27385034	27385423	WT_KDM5B.msd_peak_26629a
chr17	27385034	27385423	WT_KDM5B.msd_peak_26629b
chr17	27385730	27386275	WT_KDM5B.msd_peak_26630a
chr17	27385730	27386275	WT_KDM5B.msd_peak_26630b
chr17	27386513	27386846	WT_KDM5B.msd_peak_26631
chr17	27389556	27389977	WT_KDM5B.msd_peak_26632
chr17	27401116	27402114	WT_KDM5B.msd_peak_26633a
chr17	27401116	27402114	WT_KDM5B.msd_peak_26633b
chr17	27401116	27402114	WT_KDM5B.msd_peak_26633c
chr17	27405339	27405539	WT_KDM5B.msd_peak_26634
chr17	27405694	27405894	WT_KDM5B.msd_peak_26635
chr17	27407354	27407623	WT_KDM5B.msd_peak_26636
chr17	27418520	27418732	WT_KDM5B.msd_peak_26637
chr17	27425864	27426091	WT_KDM5B.msd_peak_26638
chr17	27472928	27473128	WT_KDM5B.msd_peak_26639
chr17	27491888	27492088	WT_KDM5B.msd_peak_26640
chr17	27492692	27492924	WT_KDM5B.msd_peak_26641a
chr17	27492692	27492924	WT_KDM5B.msd_peak_26641b
chr17	27496114	27496367	WT_KDM5B.msd_peak_26642
chr17	27501158	27501418	WT_KDM5B.msd_peak_26643
chr17	27502826	27503045	WT_KDM5B.msd_peak_26644
chr17	27505458	27505715	WT_KDM5B.msd_peak_26645a
chr17	27505458	27505715	WT_KDM5B.msd_peak_26645b
chr17	27508129	27508329	WT_KDM5B.msd_peak_26646
chr17	27512512	27512783	WT_KDM5B.msd_peak_26647
chr17	27520634	27520904	WT_KDM5B.msd_peak_26648
chr17	27523803	27524003	WT_KDM5B.msd_peak_26649
chr17	27527313	27527522	WT_KDM5B.msd_peak_26650
chr17	27528079	27528396	WT_KDM5B.msd_peak_26651
chr17	27528820	27529117	WT_KDM5B.msd_peak_26652
chr17	27533184	27533455	WT_KDM5B.msd_peak_26653
chr17	27533615	27533931	WT_KDM5B.msd_peak_26654
chr17	27535264	27535668	WT_KDM5B.msd_peak_26655
chr17	27536873	27537112	WT_KDM5B.msd_peak_26656
chr17	27538802	27539043	WT_KDM5B.msd_peak_26657
chr17	27546028	27546661	WT_KDM5B.msd_peak_26658a
chr17	27546028	27546661	WT_KDM5B.msd_peak_26658b
chr17	27548780	27549090	WT_KDM5B.msd_peak_26659
chr17	27549287	27549640	WT_KDM5B.msd_peak_26660
chr17	27552683	27553197	WT_KDM5B.msd_peak_26661
chr17	27554955	27556686	WT_KDM5B.msd_peak_26662a
chr17	27554955	27556686	WT_KDM5B.msd_peak_26662b
chr17	27554955	27556686	WT_KDM5B.msd_peak_26662c
chr17	27557217	27557956	WT_KDM5B.msd_peak_26663a
chr17	27557217	27557956	WT_KDM5B.msd_peak_26663b
chr17	27558181	27558554	WT_KDM5B.msd_peak_26664a
chr17	27558181	27558554	WT_KDM5B.msd_peak_26664b
chr17	27559425	27559682	WT_KDM5B.msd_peak_26665
chr17	27564446	27564841	WT_KDM5B.msd_peak_26666
chr17	27565317	27565598	WT_KDM5B.msd_peak_26667
chr17	27565847	27566226	WT_KDM5B.msd_peak_26668
chr17	27571716	27572182	WT_KDM5B.msd_peak_26669a
chr17	27571716	27572182	WT_KDM5B.msd_peak_26669b
chr17	27574474	27575050	WT_KDM5B.msd_peak_26670a
chr17	27574474	27575050	WT_KDM5B.msd_peak_26670b
chr17	27580511	27580762	WT_KDM5B.msd_peak_26671
chr17	27581656	27581868	WT_KDM5B.msd_peak_26672
chr17	27583544	27583869	WT_KDM5B.msd_peak_26673
chr17	27586824	27587313	WT_KDM5B.msd_peak_26674a
chr17	27586824	27587313	WT_KDM5B.msd_peak_26674b
chr17	27591396	27591709	WT_KDM5B.msd_peak_26675
chr17	27592660	27592911	WT_KDM5B.msd_peak_26676
chr17	27594467	27594891	WT_KDM5B.msd_peak_26677a
chr17	27594467	27594891	WT_KDM5B.msd_peak_26677b
chr17	27595376	27595716	WT_KDM5B.msd_peak_26678
chr17	27596993	27597272	WT_KDM5B.msd_peak_26679
chr17	27606082	27606294	WT_KDM5B.msd_peak_26680
chr17	27606524	27606848	WT_KDM5B.msd_peak_26681
chr17	27608183	27608464	WT_KDM5B.msd_peak_26682
chr17	27622727	27623890	WT_KDM5B.msd_peak_26683a
chr17	27622727	27623890	WT_KDM5B.msd_peak_26683b
chr17	27622727	27623890	WT_KDM5B.msd_peak_26683c
chr17	27631952	27632319	WT_KDM5B.msd_peak_26684
chr17	27634810	27635232	WT_KDM5B.msd_peak_26685
chr17	27636132	27636488	WT_KDM5B.msd_peak_26686
chr17	27639222	27639422	WT_KDM5B.msd_peak_26687
chr17	27642555	27642802	WT_KDM5B.msd_peak_26688
chr17	27653717	27653917	WT_KDM5B.msd_peak_26689
chr17	27654114	27654437	WT_KDM5B.msd_peak_26690
chr17	27655431	27656008	WT_KDM5B.msd_peak_26691a
chr17	27655431	27656008	WT_KDM5B.msd_peak_26691b
chr17	27657362	27657591	WT_KDM5B.msd_peak_26692
chr17	27675375	27675834	WT_KDM5B.msd_peak_26693
chr17	27685127	27686545	WT_KDM5B.msd_peak_26694a
chr17	27685127	27686545	WT_KDM5B.msd_peak_26694b
chr17	27685127	27686545	WT_KDM5B.msd_peak_26694c
chr17	27685127	27686545	WT_KDM5B.msd_peak_26694d
chr17	27685127	27686545	WT_KDM5B.msd_peak_26694e
chr17	27687939	27688253	WT_KDM5B.msd_peak_26695
chr17	27691017	27691280	WT_KDM5B.msd_peak_26696
chr17	27700987	27701300	WT_KDM5B.msd_peak_26697
chr17	27706944	27707144	WT_KDM5B.msd_peak_26698
chr17	27717189	27717538	WT_KDM5B.msd_peak_26699
chr17	27717884	27718221	WT_KDM5B.msd_peak_26700
chr17	27719784	27720545	WT_KDM5B.msd_peak_26701a
chr17	27719784	27720545	WT_KDM5B.msd_peak_26701b
chr17	27721253	27721461	WT_KDM5B.msd_peak_26702
chr17	27728285	27728929	WT_KDM5B.msd_peak_26703a
chr17	27728285	27728929	WT_KDM5B.msd_peak_26703b
chr17	27734929	27735195	WT_KDM5B.msd_peak_26704
chr17	27736555	27736853	WT_KDM5B.msd_peak_26705
chr17	27739336	27739575	WT_KDM5B.msd_peak_26706
chr17	27740628	27740828	WT_KDM5B.msd_peak_26707
chr17	27741591	27742041	WT_KDM5B.msd_peak_26708
chr17	27742691	27743012	WT_KDM5B.msd_peak_26709
chr17	27743969	27744348	WT_KDM5B.msd_peak_26710
chr17	27746298	27746508	WT_KDM5B.msd_peak_26711
chr17	27749273	27749538	WT_KDM5B.msd_peak_26712
chr17	27753992	27754318	WT_KDM5B.msd_peak_26713
chr17	27756292	27756528	WT_KDM5B.msd_peak_26714
chr17	27768226	27768509	WT_KDM5B.msd_peak_26715
chr17	27769104	27769456	WT_KDM5B.msd_peak_26716
chr17	27779012	27779247	WT_KDM5B.msd_peak_26717
chr17	27783275	27783769	WT_KDM5B.msd_peak_26718a
chr17	27783275	27783769	WT_KDM5B.msd_peak_26718b
chr17	27789369	27789619	WT_KDM5B.msd_peak_26719
chr17	27797426	27797671	WT_KDM5B.msd_peak_26720
chr17	27804776	27805101	WT_KDM5B.msd_peak_26721
chr17	27819954	27820444	WT_KDM5B.msd_peak_26722
chr17	27829417	27829768	WT_KDM5B.msd_peak_26723
chr17	27830248	27830474	WT_KDM5B.msd_peak_26724
chr17	27840183	27840420	WT_KDM5B.msd_peak_26725
chr17	27847682	27848087	WT_KDM5B.msd_peak_26726
chr17	27856497	27857184	WT_KDM5B.msd_peak_26727a
chr17	27856497	27857184	WT_KDM5B.msd_peak_26727b
chr17	27875454	27875740	WT_KDM5B.msd_peak_26728
chr17	27884404	27884732	WT_KDM5B.msd_peak_26729
chr17	27885227	27885494	WT_KDM5B.msd_peak_26730
chr17	27886145	27886413	WT_KDM5B.msd_peak_26731
chr17	27886924	27887300	WT_KDM5B.msd_peak_26732
chr17	27888284	27888523	WT_KDM5B.msd_peak_26733
chr17	27893152	27893633	WT_KDM5B.msd_peak_26734a
chr17	27893152	27893633	WT_KDM5B.msd_peak_26734b
chr17	27894687	27894899	WT_KDM5B.msd_peak_26735
chr17	27895502	27895730	WT_KDM5B.msd_peak_26736
chr17	27896665	27896975	WT_KDM5B.msd_peak_26737
chr17	27907382	27907653	WT_KDM5B.msd_peak_26738
chr17	27909066	27909809	WT_KDM5B.msd_peak_26739a
chr17	27909066	27909809	WT_KDM5B.msd_peak_26739b
chr17	27954945	27955263	WT_KDM5B.msd_peak_26740
chr17	27964211	27964447	WT_KDM5B.msd_peak_26741
chr17	27967583	27967827	WT_KDM5B.msd_peak_26742
chr17	27976550	27976947	WT_KDM5B.msd_peak_26743
chr17	27977553	27977829	WT_KDM5B.msd_peak_26744
chr17	27983603	27983830	WT_KDM5B.msd_peak_26745
chr17	27985115	27985331	WT_KDM5B.msd_peak_26746a
chr17	27985115	27985331	WT_KDM5B.msd_peak_26746b
chr17	28008321	28008871	WT_KDM5B.msd_peak_26747a
chr17	28008321	28008871	WT_KDM5B.msd_peak_26747b
chr17	28013811	28014011	WT_KDM5B.msd_peak_26748
chr17	28018868	28019068	WT_KDM5B.msd_peak_26749
chr17	28020408	28020658	WT_KDM5B.msd_peak_26750
chr17	28022956	28023273	WT_KDM5B.msd_peak_26751
chr17	28027348	28027584	WT_KDM5B.msd_peak_26752
chr17	28035261	28035616	WT_KDM5B.msd_peak_26753a
chr17	28035261	28035616	WT_KDM5B.msd_peak_26753b
chr17	28038810	28039070	WT_KDM5B.msd_peak_26754
chr17	28041880	28042486	WT_KDM5B.msd_peak_26755a
chr17	28041880	28042486	WT_KDM5B.msd_peak_26755b
chr17	28058692	28059002	WT_KDM5B.msd_peak_26756
chr17	28059747	28060818	WT_KDM5B.msd_peak_26757a
chr17	28059747	28060818	WT_KDM5B.msd_peak_26757b
chr17	28059747	28060818	WT_KDM5B.msd_peak_26757c
chr17	28061725	28061937	WT_KDM5B.msd_peak_26758
chr17	28062197	28062464	WT_KDM5B.msd_peak_26759
chr17	28066654	28067133	WT_KDM5B.msd_peak_26760
chr17	28069302	28069555	WT_KDM5B.msd_peak_26761
chr17	28070381	28070623	WT_KDM5B.msd_peak_26762
chr17	28078523	28078824	WT_KDM5B.msd_peak_26763
chr17	28079755	28080402	WT_KDM5B.msd_peak_26764a
chr17	28079755	28080402	WT_KDM5B.msd_peak_26764b
chr17	28080529	28081012	WT_KDM5B.msd_peak_26765
chr17	28088531	28088771	WT_KDM5B.msd_peak_26766
chr17	28103700	28103903	WT_KDM5B.msd_peak_26767
chr17	28104867	28105075	WT_KDM5B.msd_peak_26768
chr17	28107354	28107554	WT_KDM5B.msd_peak_26769
chr17	28117788	28118257	WT_KDM5B.msd_peak_26770a
chr17	28117788	28118257	WT_KDM5B.msd_peak_26770b
chr17	28123876	28124092	WT_KDM5B.msd_peak_26771
chr17	28133323	28133694	WT_KDM5B.msd_peak_26772
chr17	28141566	28142018	WT_KDM5B.msd_peak_26773
chr17	28142461	28142850	WT_KDM5B.msd_peak_26774
chr17	28146385	28146850	WT_KDM5B.msd_peak_26775a
chr17	28146385	28146850	WT_KDM5B.msd_peak_26775b
chr17	28155199	28156035	WT_KDM5B.msd_peak_26776a
chr17	28155199	28156035	WT_KDM5B.msd_peak_26776b
chr17	28155199	28156035	WT_KDM5B.msd_peak_26776c
chr17	28156724	28157216	WT_KDM5B.msd_peak_26777
chr17	28159528	28159790	WT_KDM5B.msd_peak_26778
chr17	28164467	28164730	WT_KDM5B.msd_peak_26779
chr17	28165020	28165294	WT_KDM5B.msd_peak_26780
chr17	28165575	28165879	WT_KDM5B.msd_peak_26781
chr17	28166186	28166520	WT_KDM5B.msd_peak_26782
chr17	28167578	28167906	WT_KDM5B.msd_peak_26783
chr17	28171580	28171783	WT_KDM5B.msd_peak_26784
chr17	28176723	28177038	WT_KDM5B.msd_peak_26785
chr17	28177282	28177688	WT_KDM5B.msd_peak_26786
chr17	28194829	28195375	WT_KDM5B.msd_peak_26787a
chr17	28194829	28195375	WT_KDM5B.msd_peak_26787b
chr17	28197783	28198055	WT_KDM5B.msd_peak_26788
chr17	28201125	28201395	WT_KDM5B.msd_peak_26789
chr17	28202086	28202609	WT_KDM5B.msd_peak_26790a
chr17	28202086	28202609	WT_KDM5B.msd_peak_26790b
chr17	28202986	28203217	WT_KDM5B.msd_peak_26791
chr17	28205048	28205344	WT_KDM5B.msd_peak_26792
chr17	28207764	28208148	WT_KDM5B.msd_peak_26793
chr17	28219683	28220157	WT_KDM5B.msd_peak_26794
chr17	28222593	28222822	WT_KDM5B.msd_peak_26795
chr17	28223577	28224079	WT_KDM5B.msd_peak_26796
chr17	28225769	28226265	WT_KDM5B.msd_peak_26797
chr17	28232842	28233134	WT_KDM5B.msd_peak_26798
chr17	28236117	28236410	WT_KDM5B.msd_peak_26799
chr17	28237007	28237217	WT_KDM5B.msd_peak_26800
chr17	28243723	28244043	WT_KDM5B.msd_peak_26801
chr17	28244270	28244596	WT_KDM5B.msd_peak_26802
chr17	28251502	28251798	WT_KDM5B.msd_peak_26803
chr17	28254288	28254499	WT_KDM5B.msd_peak_26804
chr17	28255673	28256105	WT_KDM5B.msd_peak_26805a
chr17	28255673	28256105	WT_KDM5B.msd_peak_26805b
chr17	28260581	28260811	WT_KDM5B.msd_peak_26806
chr17	28261499	28261761	WT_KDM5B.msd_peak_26807
chr17	28269449	28269671	WT_KDM5B.msd_peak_26808
chr17	28270151	28270614	WT_KDM5B.msd_peak_26809
chr17	28270813	28271076	WT_KDM5B.msd_peak_26810
chr17	28271506	28271949	WT_KDM5B.msd_peak_26811a
chr17	28271506	28271949	WT_KDM5B.msd_peak_26811b
chr17	28272605	28272875	WT_KDM5B.msd_peak_26812
chr17	28274670	28274884	WT_KDM5B.msd_peak_26813
chr17	28277250	28277471	WT_KDM5B.msd_peak_26814
chr17	28279409	28279636	WT_KDM5B.msd_peak_26815
chr17	28279893	28280486	WT_KDM5B.msd_peak_26816a
chr17	28279893	28280486	WT_KDM5B.msd_peak_26816b
chr17	28280962	28281733	WT_KDM5B.msd_peak_26817a
chr17	28280962	28281733	WT_KDM5B.msd_peak_26817b
chr17	28283139	28283420	WT_KDM5B.msd_peak_26818
chr17	28286085	28286523	WT_KDM5B.msd_peak_26819
chr17	28287653	28287925	WT_KDM5B.msd_peak_26820
chr17	28292412	28292612	WT_KDM5B.msd_peak_26821
chr17	28297029	28297802	WT_KDM5B.msd_peak_26822
chr17	28298134	28298405	WT_KDM5B.msd_peak_26823
chr17	28298601	28299178	WT_KDM5B.msd_peak_26824a
chr17	28298601	28299178	WT_KDM5B.msd_peak_26824b
chr17	28301186	28301404	WT_KDM5B.msd_peak_26825
chr17	28313557	28314012	WT_KDM5B.msd_peak_26826a
chr17	28313557	28314012	WT_KDM5B.msd_peak_26826b
chr17	28314300	28314522	WT_KDM5B.msd_peak_26827
chr17	28315674	28315886	WT_KDM5B.msd_peak_26828
chr17	28318399	28318601	WT_KDM5B.msd_peak_26829
chr17	28320722	28320952	WT_KDM5B.msd_peak_26830
chr17	28325860	28326060	WT_KDM5B.msd_peak_26831
chr17	28328678	28329614	WT_KDM5B.msd_peak_26832
chr17	28332341	28333908	WT_KDM5B.msd_peak_26833a
chr17	28332341	28333908	WT_KDM5B.msd_peak_26833b
chr17	28332341	28333908	WT_KDM5B.msd_peak_26833c
chr17	28332341	28333908	WT_KDM5B.msd_peak_26833d
chr17	28336447	28336647	WT_KDM5B.msd_peak_26834
chr17	28341055	28341628	WT_KDM5B.msd_peak_26835a
chr17	28341055	28341628	WT_KDM5B.msd_peak_26835b
chr17	28345496	28345886	WT_KDM5B.msd_peak_26836
chr17	28346003	28346254	WT_KDM5B.msd_peak_26837a
chr17	28346003	28346254	WT_KDM5B.msd_peak_26837b
chr17	28347286	28347702	WT_KDM5B.msd_peak_26838
chr17	28349520	28349733	WT_KDM5B.msd_peak_26839
chr17	28349959	28350228	WT_KDM5B.msd_peak_26840
chr17	28350383	28350786	WT_KDM5B.msd_peak_26841
chr17	28350929	28351200	WT_KDM5B.msd_peak_26842
chr17	28351381	28352308	WT_KDM5B.msd_peak_26843a
chr17	28351381	28352308	WT_KDM5B.msd_peak_26843b
chr17	28351381	28352308	WT_KDM5B.msd_peak_26843c
chr17	28356303	28356503	WT_KDM5B.msd_peak_26844
chr17	28358311	28358511	WT_KDM5B.msd_peak_26845
chr17	28364829	28365253	WT_KDM5B.msd_peak_26846a
chr17	28364829	28365253	WT_KDM5B.msd_peak_26846b
chr17	28369169	28369531	WT_KDM5B.msd_peak_26847
chr17	28372039	28372433	WT_KDM5B.msd_peak_26848
chr17	28375058	28375684	WT_KDM5B.msd_peak_26849a
chr17	28375058	28375684	WT_KDM5B.msd_peak_26849b
chr17	28383050	28383280	WT_KDM5B.msd_peak_26850
chr17	28386254	28386818	WT_KDM5B.msd_peak_26851a
chr17	28386254	28386818	WT_KDM5B.msd_peak_26851b
chr17	28391722	28392244	WT_KDM5B.msd_peak_26852a
chr17	28391722	28392244	WT_KDM5B.msd_peak_26852b
chr17	28391722	28392244	WT_KDM5B.msd_peak_26852c
chr17	28402590	28402918	WT_KDM5B.msd_peak_26853
chr17	28404371	28404670	WT_KDM5B.msd_peak_26854
chr17	28433064	28433290	WT_KDM5B.msd_peak_26855
chr17	28475507	28475707	WT_KDM5B.msd_peak_26856
chr17	28485356	28485839	WT_KDM5B.msd_peak_26857
chr17	28486383	28486586	WT_KDM5B.msd_peak_26858
chr17	28515800	28516051	WT_KDM5B.msd_peak_26859
chr17	28517444	28517785	WT_KDM5B.msd_peak_26860
chr17	28518980	28519206	WT_KDM5B.msd_peak_26861
chr17	28522820	28523632	WT_KDM5B.msd_peak_26862a
chr17	28522820	28523632	WT_KDM5B.msd_peak_26862b
chr17	28524125	28524352	WT_KDM5B.msd_peak_26863
chr17	28543733	28544001	WT_KDM5B.msd_peak_26864
chr17	28549339	28549734	WT_KDM5B.msd_peak_26865
chr17	28551698	28551984	WT_KDM5B.msd_peak_26866
chr17	28554234	28554576	WT_KDM5B.msd_peak_26867
chr17	28572643	28572932	WT_KDM5B.msd_peak_26868
chr17	28573864	28574072	WT_KDM5B.msd_peak_26869
chr17	28575298	28575920	WT_KDM5B.msd_peak_26870a
chr17	28575298	28575920	WT_KDM5B.msd_peak_26870b
chr17	28579986	28580427	WT_KDM5B.msd_peak_26871a
chr17	28579986	28580427	WT_KDM5B.msd_peak_26871b
chr17	28591624	28591824	WT_KDM5B.msd_peak_26872
chr17	28592384	28592797	WT_KDM5B.msd_peak_26873
chr17	28593831	28594152	WT_KDM5B.msd_peak_26874
chr17	28598396	28598619	WT_KDM5B.msd_peak_26875
chr17	28609082	28609309	WT_KDM5B.msd_peak_26876
chr17	28614990	28615253	WT_KDM5B.msd_peak_26877
chr17	28621422	28622402	WT_KDM5B.msd_peak_26878a
chr17	28621422	28622402	WT_KDM5B.msd_peak_26878b
chr17	28652308	28652508	WT_KDM5B.msd_peak_26879
chr17	28667171	28667379	WT_KDM5B.msd_peak_26880
chr17	28685961	28686261	WT_KDM5B.msd_peak_26881
chr17	28689593	28689952	WT_KDM5B.msd_peak_26882
chr17	28691558	28692318	WT_KDM5B.msd_peak_26883a
chr17	28691558	28692318	WT_KDM5B.msd_peak_26883b
chr17	28726155	28726433	WT_KDM5B.msd_peak_26884
chr17	28760906	28761106	WT_KDM5B.msd_peak_26885
chr17	28769417	28769747	WT_KDM5B.msd_peak_26886
chr17	28769895	28770155	WT_KDM5B.msd_peak_26887a
chr17	28769895	28770155	WT_KDM5B.msd_peak_26887b
chr17	28773961	28774174	WT_KDM5B.msd_peak_26888
chr17	28789264	28789468	WT_KDM5B.msd_peak_26889
chr17	28800460	28801171	WT_KDM5B.msd_peak_26890
chr17	28801940	28802307	WT_KDM5B.msd_peak_26891
chr17	28806397	28806597	WT_KDM5B.msd_peak_26892
chr17	28806816	28807180	WT_KDM5B.msd_peak_26893a
chr17	28806816	28807180	WT_KDM5B.msd_peak_26893b
chr17	28809244	28809686	WT_KDM5B.msd_peak_26894
chr17	28810473	28810754	WT_KDM5B.msd_peak_26895
chr17	28814599	28814904	WT_KDM5B.msd_peak_26896
chr17	28816764	28816984	WT_KDM5B.msd_peak_26897
chr17	28821267	28821513	WT_KDM5B.msd_peak_26898
chr17	28822232	28822441	WT_KDM5B.msd_peak_26899
chr17	28827931	28828143	WT_KDM5B.msd_peak_26900
chr17	28836629	28836841	WT_KDM5B.msd_peak_26901
chr17	28879938	28880473	WT_KDM5B.msd_peak_26902a
chr17	28879938	28880473	WT_KDM5B.msd_peak_26902b
chr17	28883511	28883773	WT_KDM5B.msd_peak_26903
chr17	28899585	28899840	WT_KDM5B.msd_peak_26904
chr17	28901893	28902136	WT_KDM5B.msd_peak_26905
chr17	28904454	28904842	WT_KDM5B.msd_peak_26906
chr17	28909682	28909902	WT_KDM5B.msd_peak_26907
chr17	28926770	28927031	WT_KDM5B.msd_peak_26908
chr17	28931672	28931878	WT_KDM5B.msd_peak_26909
chr17	28933529	28933798	WT_KDM5B.msd_peak_26910
chr17	28940866	28941124	WT_KDM5B.msd_peak_26911
chr17	28946735	28947171	WT_KDM5B.msd_peak_26912
chr17	28952192	28952399	WT_KDM5B.msd_peak_26913
chr17	28983033	28983334	WT_KDM5B.msd_peak_26914
chr17	29001437	29001641	WT_KDM5B.msd_peak_26915
chr17	29007199	29007947	WT_KDM5B.msd_peak_26916a
chr17	29007199	29007947	WT_KDM5B.msd_peak_26916b
chr17	29008831	29009103	WT_KDM5B.msd_peak_26917
chr17	29018838	29019087	WT_KDM5B.msd_peak_26918
chr17	29021097	29021420	WT_KDM5B.msd_peak_26919
chr17	29031822	29032466	WT_KDM5B.msd_peak_26920a
chr17	29031822	29032466	WT_KDM5B.msd_peak_26920b
chr17	29032764	29033029	WT_KDM5B.msd_peak_26921
chr17	29038281	29038643	WT_KDM5B.msd_peak_26922
chr17	29046185	29046493	WT_KDM5B.msd_peak_26923
chr17	29056805	29057053	WT_KDM5B.msd_peak_26924
chr17	29067469	29067679	WT_KDM5B.msd_peak_26925
chr17	29082781	29083341	WT_KDM5B.msd_peak_26926a
chr17	29082781	29083341	WT_KDM5B.msd_peak_26926b
chr17	29085373	29085679	WT_KDM5B.msd_peak_26927
chr17	29093852	29095168	WT_KDM5B.msd_peak_26928a
chr17	29093852	29095168	WT_KDM5B.msd_peak_26928b
chr17	29093852	29095168	WT_KDM5B.msd_peak_26928c
chr17	29098433	29098868	WT_KDM5B.msd_peak_26929
chr17	29113850	29114189	WT_KDM5B.msd_peak_26930
chr17	29120539	29121018	WT_KDM5B.msd_peak_26931
chr17	29135795	29136420	WT_KDM5B.msd_peak_26932a
chr17	29135795	29136420	WT_KDM5B.msd_peak_26932b
chr17	29137975	29138245	WT_KDM5B.msd_peak_26933
chr17	29139305	29139824	WT_KDM5B.msd_peak_26934a
chr17	29139305	29139824	WT_KDM5B.msd_peak_26934b
chr17	29144356	29144728	WT_KDM5B.msd_peak_26935
chr17	29145207	29145407	WT_KDM5B.msd_peak_26936
chr17	29145949	29146286	WT_KDM5B.msd_peak_26937
chr17	29147189	29147425	WT_KDM5B.msd_peak_26938
chr17	29149908	29150179	WT_KDM5B.msd_peak_26939
chr17	29152711	29152911	WT_KDM5B.msd_peak_26940
chr17	29164561	29164963	WT_KDM5B.msd_peak_26941a
chr17	29164561	29164963	WT_KDM5B.msd_peak_26941b
chr17	29166008	29166262	WT_KDM5B.msd_peak_26942
chr17	29169521	29169795	WT_KDM5B.msd_peak_26943
chr17	29173330	29173541	WT_KDM5B.msd_peak_26944
chr17	29178810	29179019	WT_KDM5B.msd_peak_26945
chr17	29179994	29180378	WT_KDM5B.msd_peak_26946
chr17	29189069	29189333	WT_KDM5B.msd_peak_26947
chr17	29216349	29216607	WT_KDM5B.msd_peak_26948
chr17	29229468	29229816	WT_KDM5B.msd_peak_26949
chr17	29237298	29237857	WT_KDM5B.msd_peak_26950a
chr17	29237298	29237857	WT_KDM5B.msd_peak_26950b
chr17	29238186	29238510	WT_KDM5B.msd_peak_26951
chr17	29238734	29238993	WT_KDM5B.msd_peak_26952
chr17	29245013	29245350	WT_KDM5B.msd_peak_26953
chr17	29247985	29248251	WT_KDM5B.msd_peak_26954
chr17	29250048	29250619	WT_KDM5B.msd_peak_26955a
chr17	29250048	29250619	WT_KDM5B.msd_peak_26955b
chr17	29251295	29251947	WT_KDM5B.msd_peak_26956a
chr17	29251295	29251947	WT_KDM5B.msd_peak_26956b
chr17	29257186	29257407	WT_KDM5B.msd_peak_26957
chr17	29260525	29260796	WT_KDM5B.msd_peak_26958
chr17	29261488	29262011	WT_KDM5B.msd_peak_26959a
chr17	29261488	29262011	WT_KDM5B.msd_peak_26959b
chr17	29269008	29269323	WT_KDM5B.msd_peak_26960
chr17	29282341	29282636	WT_KDM5B.msd_peak_26961
chr17	29285907	29286118	WT_KDM5B.msd_peak_26962
chr17	29286592	29287000	WT_KDM5B.msd_peak_26963
chr17	29297786	29298048	WT_KDM5B.msd_peak_26964
chr17	29299086	29299309	WT_KDM5B.msd_peak_26965
chr17	29302262	29302613	WT_KDM5B.msd_peak_26966
chr17	29305780	29306102	WT_KDM5B.msd_peak_26967a
chr17	29305780	29306102	WT_KDM5B.msd_peak_26967b
chr17	29307771	29307982	WT_KDM5B.msd_peak_26968
chr17	29315062	29315273	WT_KDM5B.msd_peak_26969
chr17	29317017	29317261	WT_KDM5B.msd_peak_26970
chr17	29319144	29319420	WT_KDM5B.msd_peak_26971
chr17	29321814	29322390	WT_KDM5B.msd_peak_26972
chr17	29327317	29327803	WT_KDM5B.msd_peak_26973a
chr17	29327317	29327803	WT_KDM5B.msd_peak_26973b
chr17	29328375	29328822	WT_KDM5B.msd_peak_26974a
chr17	29328375	29328822	WT_KDM5B.msd_peak_26974b
chr17	29332310	29332540	WT_KDM5B.msd_peak_26975
chr17	29336457	29336918	WT_KDM5B.msd_peak_26976
chr17	29338300	29338561	WT_KDM5B.msd_peak_26977
chr17	29339025	29339604	WT_KDM5B.msd_peak_26978
chr17	29340559	29340812	WT_KDM5B.msd_peak_26979
chr17	29341689	29341889	WT_KDM5B.msd_peak_26980
chr17	29342704	29342974	WT_KDM5B.msd_peak_26981
chr17	29344212	29344520	WT_KDM5B.msd_peak_26982
chr17	29347410	29347651	WT_KDM5B.msd_peak_26983
chr17	29366763	29366963	WT_KDM5B.msd_peak_26984
chr17	29367840	29368046	WT_KDM5B.msd_peak_26985
chr17	29374875	29375201	WT_KDM5B.msd_peak_26986
chr17	29375904	29376197	WT_KDM5B.msd_peak_26987
chr17	29385151	29385438	WT_KDM5B.msd_peak_26988
chr17	29389174	29389459	WT_KDM5B.msd_peak_26989
chr17	29395559	29395988	WT_KDM5B.msd_peak_26990a
chr17	29395559	29395988	WT_KDM5B.msd_peak_26990b
chr17	29396887	29397286	WT_KDM5B.msd_peak_26991a
chr17	29396887	29397286	WT_KDM5B.msd_peak_26991b
chr17	29397927	29398338	WT_KDM5B.msd_peak_26992
chr17	29399532	29399971	WT_KDM5B.msd_peak_26993
chr17	29402118	29402367	WT_KDM5B.msd_peak_26994
chr17	29407435	29407872	WT_KDM5B.msd_peak_26995
chr17	29415974	29416508	WT_KDM5B.msd_peak_26996
chr17	29416964	29417166	WT_KDM5B.msd_peak_26997
chr17	29425303	29425624	WT_KDM5B.msd_peak_26998
chr17	29427559	29427766	WT_KDM5B.msd_peak_26999
chr17	29428055	29428389	WT_KDM5B.msd_peak_27000
chr17	29436409	29436613	WT_KDM5B.msd_peak_27001
chr17	29436851	29437309	WT_KDM5B.msd_peak_27002
chr17	29438376	29438675	WT_KDM5B.msd_peak_27003
chr17	29457889	29458241	WT_KDM5B.msd_peak_27004
chr17	29459429	29459653	WT_KDM5B.msd_peak_27005
chr17	29469004	29469248	WT_KDM5B.msd_peak_27006
chr17	29489875	29490274	WT_KDM5B.msd_peak_27007a
chr17	29489875	29490274	WT_KDM5B.msd_peak_27007b
chr17	29490824	29491719	WT_KDM5B.msd_peak_27008a
chr17	29490824	29491719	WT_KDM5B.msd_peak_27008b
chr17	29490824	29491719	WT_KDM5B.msd_peak_27008c
chr17	29491845	29492207	WT_KDM5B.msd_peak_27009
chr17	29494717	29494951	WT_KDM5B.msd_peak_27010
chr17	29503322	29503538	WT_KDM5B.msd_peak_27011
chr17	29519159	29519470	WT_KDM5B.msd_peak_27012
chr17	29549603	29550290	WT_KDM5B.msd_peak_27013a
chr17	29549603	29550290	WT_KDM5B.msd_peak_27013b
chr17	29564067	29564281	WT_KDM5B.msd_peak_27014
chr17	29596893	29597278	WT_KDM5B.msd_peak_27015a
chr17	29596893	29597278	WT_KDM5B.msd_peak_27015b
chr17	29604485	29605304	WT_KDM5B.msd_peak_27016a
chr17	29604485	29605304	WT_KDM5B.msd_peak_27016b
chr17	29604485	29605304	WT_KDM5B.msd_peak_27016c
chr17	29614869	29615326	WT_KDM5B.msd_peak_27017
chr17	29641744	29641979	WT_KDM5B.msd_peak_27018
chr17	29660713	29661312	WT_KDM5B.msd_peak_27019a
chr17	29660713	29661312	WT_KDM5B.msd_peak_27019b
chr17	29685262	29685520	WT_KDM5B.msd_peak_27020
chr17	29687476	29687779	WT_KDM5B.msd_peak_27021
chr17	29688909	29689114	WT_KDM5B.msd_peak_27022
chr17	29693999	29694263	WT_KDM5B.msd_peak_27023
chr17	29707097	29707311	WT_KDM5B.msd_peak_27024
chr17	29709777	29709980	WT_KDM5B.msd_peak_27025
chr17	29795535	29795735	WT_KDM5B.msd_peak_27026
chr17	29886668	29887563	WT_KDM5B.msd_peak_27027a
chr17	29886668	29887563	WT_KDM5B.msd_peak_27027b
chr17	29886668	29887563	WT_KDM5B.msd_peak_27027c
chr17	29886668	29887563	WT_KDM5B.msd_peak_27027d
chr17	29888430	29888748	WT_KDM5B.msd_peak_27028
chr17	29889097	29889950	WT_KDM5B.msd_peak_27029a
chr17	29889097	29889950	WT_KDM5B.msd_peak_27029b
chr17	29928712	29929195	WT_KDM5B.msd_peak_27030
chr17	30005009	30005717	WT_KDM5B.msd_peak_27031a
chr17	30005009	30005717	WT_KDM5B.msd_peak_27031b
chr17	30005009	30005717	WT_KDM5B.msd_peak_27031c
chr17	30068196	30068571	WT_KDM5B.msd_peak_27032
chr17	30093903	30094196	WT_KDM5B.msd_peak_27033
chr17	30133721	30133954	WT_KDM5B.msd_peak_27034
chr17	30140144	30140543	WT_KDM5B.msd_peak_27035
chr17	30142374	30142628	WT_KDM5B.msd_peak_27036
chr17	30155430	30155733	WT_KDM5B.msd_peak_27037a
chr17	30155430	30155733	WT_KDM5B.msd_peak_27037b
chr17	30175847	30176165	WT_KDM5B.msd_peak_27038
chr17	30191320	30191631	WT_KDM5B.msd_peak_27039
chr17	30197813	30198066	WT_KDM5B.msd_peak_27040
chr17	30202156	30202606	WT_KDM5B.msd_peak_27041
chr17	30203527	30203732	WT_KDM5B.msd_peak_27042
chr17	30206021	30206448	WT_KDM5B.msd_peak_27043
chr17	30207013	30207404	WT_KDM5B.msd_peak_27044
chr17	30207809	30208009	WT_KDM5B.msd_peak_27045
chr17	30208943	30209257	WT_KDM5B.msd_peak_27046
chr17	30209542	30209769	WT_KDM5B.msd_peak_27047
chr17	30210845	30211045	WT_KDM5B.msd_peak_27048
chr17	30211374	30211586	WT_KDM5B.msd_peak_27049
chr17	30359375	30359610	WT_KDM5B.msd_peak_27050
chr17	30370113	30370345	WT_KDM5B.msd_peak_27051
chr17	30452426	30452665	WT_KDM5B.msd_peak_27052
chr17	30483471	30484016	WT_KDM5B.msd_peak_27053a
chr17	30483471	30484016	WT_KDM5B.msd_peak_27053b
chr17	30491578	30491816	WT_KDM5B.msd_peak_27054
chr17	30507220	30507420	WT_KDM5B.msd_peak_27055
chr17	30518877	30519280	WT_KDM5B.msd_peak_27056
chr17	30528994	30529266	WT_KDM5B.msd_peak_27057
chr17	30537410	30537630	WT_KDM5B.msd_peak_27058
chr17	30553855	30554203	WT_KDM5B.msd_peak_27059
chr17	30557906	30558125	WT_KDM5B.msd_peak_27060
chr17	30575545	30576719	WT_KDM5B.msd_peak_27061a
chr17	30575545	30576719	WT_KDM5B.msd_peak_27061b
chr17	30575545	30576719	WT_KDM5B.msd_peak_27061c
chr17	30590368	30590617	WT_KDM5B.msd_peak_27062
chr17	30597496	30597696	WT_KDM5B.msd_peak_27063
chr17	30597841	30598074	WT_KDM5B.msd_peak_27064
chr17	30598717	30598984	WT_KDM5B.msd_peak_27065
chr17	30600698	30600988	WT_KDM5B.msd_peak_27066
chr17	30602413	30602665	WT_KDM5B.msd_peak_27067
chr17	30612241	30612583	WT_KDM5B.msd_peak_27068
chr17	30624204	30624516	WT_KDM5B.msd_peak_27069
chr17	30635487	30635776	WT_KDM5B.msd_peak_27070a
chr17	30635487	30635776	WT_KDM5B.msd_peak_27070b
chr17	30656978	30657203	WT_KDM5B.msd_peak_27071
chr17	30671585	30671827	WT_KDM5B.msd_peak_27072
chr17	30688038	30688351	WT_KDM5B.msd_peak_27073
chr17	30717994	30718195	WT_KDM5B.msd_peak_27074
chr17	30749476	30749701	WT_KDM5B.msd_peak_27075
chr17	30764227	30764455	WT_KDM5B.msd_peak_27076
chr17	30785867	30786080	WT_KDM5B.msd_peak_27077
chr17	30798674	30799033	WT_KDM5B.msd_peak_27078
chr17	30800600	30800872	WT_KDM5B.msd_peak_27079
chr17	30803085	30803508	WT_KDM5B.msd_peak_27080
chr17	30833802	30834034	WT_KDM5B.msd_peak_27081
chr17	30836307	30836673	WT_KDM5B.msd_peak_27082
chr17	30837294	30837494	WT_KDM5B.msd_peak_27083
chr17	30848551	30848833	WT_KDM5B.msd_peak_27084
chr17	30853451	30853957	WT_KDM5B.msd_peak_27085a
chr17	30853451	30853957	WT_KDM5B.msd_peak_27085b
chr17	30854873	30855130	WT_KDM5B.msd_peak_27086
chr17	30857371	30857576	WT_KDM5B.msd_peak_27087
chr17	30882836	30883037	WT_KDM5B.msd_peak_27088
chr17	30893321	30893661	WT_KDM5B.msd_peak_27089a
chr17	30893321	30893661	WT_KDM5B.msd_peak_27089b
chr17	30901649	30901891	WT_KDM5B.msd_peak_27090
chr17	30902472	30902781	WT_KDM5B.msd_peak_27091
chr17	30909154	30909569	WT_KDM5B.msd_peak_27092
chr17	30911422	30912042	WT_KDM5B.msd_peak_27093a
chr17	30911422	30912042	WT_KDM5B.msd_peak_27093b
chr17	30917652	30917875	WT_KDM5B.msd_peak_27094
chr17	31036545	31036841	WT_KDM5B.msd_peak_27095
chr17	31057727	31058272	WT_KDM5B.msd_peak_27096a
chr17	31057727	31058272	WT_KDM5B.msd_peak_27096b
chr17	31073282	31073591	WT_KDM5B.msd_peak_27097
chr17	31121957	31122195	WT_KDM5B.msd_peak_27098
chr17	31164395	31164595	WT_KDM5B.msd_peak_27099
chr17	31295981	31296374	WT_KDM5B.msd_peak_27100
chr17	31296524	31296739	WT_KDM5B.msd_peak_27101
chr17	31308566	31308774	WT_KDM5B.msd_peak_27102
chr17	31317608	31317808	WT_KDM5B.msd_peak_27103
chr17	31324421	31324758	WT_KDM5B.msd_peak_27104
chr17	31329898	31330107	WT_KDM5B.msd_peak_27105
chr17	31350794	31351191	WT_KDM5B.msd_peak_27106
chr17	31386303	31386544	WT_KDM5B.msd_peak_27107
chr17	31442946	31443146	WT_KDM5B.msd_peak_27108
chr17	31463408	31463715	WT_KDM5B.msd_peak_27109
chr17	31496526	31496733	WT_KDM5B.msd_peak_27110
chr17	31499795	31500030	WT_KDM5B.msd_peak_27111
chr17	31511937	31512218	WT_KDM5B.msd_peak_27112
chr17	31528163	31528363	WT_KDM5B.msd_peak_27113
chr17	31553786	31553986	WT_KDM5B.msd_peak_27114
chr17	31565332	31565655	WT_KDM5B.msd_peak_27115
chr17	31570324	31570619	WT_KDM5B.msd_peak_27116
chr17	31585643	31586009	WT_KDM5B.msd_peak_27117
chr17	31607322	31607549	WT_KDM5B.msd_peak_27118
chr17	31618925	31619157	WT_KDM5B.msd_peak_27119
chr17	31636830	31637303	WT_KDM5B.msd_peak_27120a
chr17	31636830	31637303	WT_KDM5B.msd_peak_27120b
chr17	31644561	31645000	WT_KDM5B.msd_peak_27121
chr17	31648627	31648999	WT_KDM5B.msd_peak_27122
chr17	31653323	31653612	WT_KDM5B.msd_peak_27123
chr17	31658274	31658673	WT_KDM5B.msd_peak_27124
chr17	31670089	31670504	WT_KDM5B.msd_peak_27125a
chr17	31670089	31670504	WT_KDM5B.msd_peak_27125b
chr17	31685754	31686127	WT_KDM5B.msd_peak_27126a
chr17	31685754	31686127	WT_KDM5B.msd_peak_27126b
chr17	31728939	31729411	WT_KDM5B.msd_peak_27127a
chr17	31728939	31729411	WT_KDM5B.msd_peak_27127b
chr17	31731001	31731201	WT_KDM5B.msd_peak_27128
chr17	31732084	31732297	WT_KDM5B.msd_peak_27129
chr17	31746779	31747135	WT_KDM5B.msd_peak_27130
chr17	31747761	31747973	WT_KDM5B.msd_peak_27131
chr17	31753916	31754128	WT_KDM5B.msd_peak_27132
chr17	31766881	31767355	WT_KDM5B.msd_peak_27133
chr17	31790631	31791025	WT_KDM5B.msd_peak_27134
chr17	31804926	31805126	WT_KDM5B.msd_peak_27135
chr17	31808575	31808793	WT_KDM5B.msd_peak_27136
chr17	31810019	31810252	WT_KDM5B.msd_peak_27137
chr17	31821184	31821384	WT_KDM5B.msd_peak_27138
chr17	31827329	31827537	WT_KDM5B.msd_peak_27139
chr17	31835172	31835418	WT_KDM5B.msd_peak_27140
chr17	31839027	31839361	WT_KDM5B.msd_peak_27141
chr17	31844857	31845057	WT_KDM5B.msd_peak_27142
chr17	31845705	31845979	WT_KDM5B.msd_peak_27143
chr17	31846272	31846704	WT_KDM5B.msd_peak_27144
chr17	31847965	31848495	WT_KDM5B.msd_peak_27145
chr17	31849853	31850171	WT_KDM5B.msd_peak_27146
chr17	31850743	31851227	WT_KDM5B.msd_peak_27147
chr17	31854873	31855767	WT_KDM5B.msd_peak_27148a
chr17	31854873	31855767	WT_KDM5B.msd_peak_27148b
chr17	31856636	31856848	WT_KDM5B.msd_peak_27149
chr17	31861382	31861627	WT_KDM5B.msd_peak_27150
chr17	31867910	31868167	WT_KDM5B.msd_peak_27151
chr17	31882337	31882547	WT_KDM5B.msd_peak_27152
chr17	31889549	31889961	WT_KDM5B.msd_peak_27153a
chr17	31889549	31889961	WT_KDM5B.msd_peak_27153b
chr17	31890276	31890553	WT_KDM5B.msd_peak_27154
chr17	31896411	31896661	WT_KDM5B.msd_peak_27155
chr17	31905428	31905636	WT_KDM5B.msd_peak_27156
chr17	31906137	31906360	WT_KDM5B.msd_peak_27157
chr17	31911999	31912243	WT_KDM5B.msd_peak_27158
chr17	31912360	31912590	WT_KDM5B.msd_peak_27159
chr17	31913425	31913639	WT_KDM5B.msd_peak_27160
chr17	31915538	31915856	WT_KDM5B.msd_peak_27161
chr17	31916400	31916634	WT_KDM5B.msd_peak_27162
chr17	31916743	31917071	WT_KDM5B.msd_peak_27163
chr17	31931503	31931703	WT_KDM5B.msd_peak_27164
chr17	31944275	31944567	WT_KDM5B.msd_peak_27165
chr17	31950549	31950752	WT_KDM5B.msd_peak_27166
chr17	31978598	31979029	WT_KDM5B.msd_peak_27167
chr17	31979149	31979365	WT_KDM5B.msd_peak_27168
chr17	32034233	32034537	WT_KDM5B.msd_peak_27169
chr17	32035995	32036227	WT_KDM5B.msd_peak_27170
chr17	32036413	32036725	WT_KDM5B.msd_peak_27171
chr17	32051239	32051500	WT_KDM5B.msd_peak_27172
chr17	32073486	32074094	WT_KDM5B.msd_peak_27173a
chr17	32073486	32074094	WT_KDM5B.msd_peak_27173b
chr17	32075264	32075620	WT_KDM5B.msd_peak_27174
chr17	32076547	32076996	WT_KDM5B.msd_peak_27175a
chr17	32076547	32076996	WT_KDM5B.msd_peak_27175b
chr17	32081984	32082291	WT_KDM5B.msd_peak_27176
chr17	32090320	32090579	WT_KDM5B.msd_peak_27177
chr17	32100319	32100717	WT_KDM5B.msd_peak_27178
chr17	32105796	32106006	WT_KDM5B.msd_peak_27179
chr17	32113447	32114387	WT_KDM5B.msd_peak_27180a
chr17	32113447	32114387	WT_KDM5B.msd_peak_27180b
chr17	32113447	32114387	WT_KDM5B.msd_peak_27180c
chr17	32122218	32122799	WT_KDM5B.msd_peak_27181a
chr17	32122218	32122799	WT_KDM5B.msd_peak_27181b
chr17	32133380	32133645	WT_KDM5B.msd_peak_27182
chr17	32135206	32135601	WT_KDM5B.msd_peak_27183
chr17	32141092	32141537	WT_KDM5B.msd_peak_27184
chr17	32143107	32143826	WT_KDM5B.msd_peak_27185a
chr17	32143107	32143826	WT_KDM5B.msd_peak_27185b
chr17	32144322	32144555	WT_KDM5B.msd_peak_27186
chr17	32146919	32147433	WT_KDM5B.msd_peak_27187a
chr17	32146919	32147433	WT_KDM5B.msd_peak_27187b
chr17	32158569	32159009	WT_KDM5B.msd_peak_27188
chr17	32159272	32159824	WT_KDM5B.msd_peak_27189a
chr17	32159272	32159824	WT_KDM5B.msd_peak_27189b
chr17	32162195	32162776	WT_KDM5B.msd_peak_27190
chr17	32164093	32164430	WT_KDM5B.msd_peak_27191
chr17	32165558	32166163	WT_KDM5B.msd_peak_27192
chr17	32166637	32167101	WT_KDM5B.msd_peak_27193a
chr17	32166637	32167101	WT_KDM5B.msd_peak_27193b
chr17	32173255	32173542	WT_KDM5B.msd_peak_27194
chr17	32189133	32189333	WT_KDM5B.msd_peak_27195
chr17	32197148	32197695	WT_KDM5B.msd_peak_27196
chr17	32198045	32198321	WT_KDM5B.msd_peak_27197
chr17	32198946	32199179	WT_KDM5B.msd_peak_27198
chr17	32202161	32202501	WT_KDM5B.msd_peak_27199a
chr17	32202161	32202501	WT_KDM5B.msd_peak_27199b
chr17	32211371	32211716	WT_KDM5B.msd_peak_27200
chr17	32258039	32258305	WT_KDM5B.msd_peak_27201
chr17	32283782	32284118	WT_KDM5B.msd_peak_27202
chr17	32284326	32284585	WT_KDM5B.msd_peak_27203
chr17	32305371	32305578	WT_KDM5B.msd_peak_27204
chr17	32312327	32312529	WT_KDM5B.msd_peak_27205
chr17	32312981	32313181	WT_KDM5B.msd_peak_27206
chr17	32316193	32316524	WT_KDM5B.msd_peak_27207
chr17	32320390	32320628	WT_KDM5B.msd_peak_27208
chr17	32320786	32321132	WT_KDM5B.msd_peak_27209
chr17	32321454	32321694	WT_KDM5B.msd_peak_27210
chr17	32333664	32333981	WT_KDM5B.msd_peak_27211
chr17	32334097	32334341	WT_KDM5B.msd_peak_27212
chr17	32335100	32335300	WT_KDM5B.msd_peak_27213
chr17	32336385	32336636	WT_KDM5B.msd_peak_27214
chr17	32357552	32357806	WT_KDM5B.msd_peak_27215
chr17	32359915	32360467	WT_KDM5B.msd_peak_27216a
chr17	32359915	32360467	WT_KDM5B.msd_peak_27216b
chr17	32361650	32361891	WT_KDM5B.msd_peak_27217
chr17	32362751	32362991	WT_KDM5B.msd_peak_27218
chr17	32363831	32364235	WT_KDM5B.msd_peak_27219
chr17	32381035	32381240	WT_KDM5B.msd_peak_27220
chr17	32388660	32389087	WT_KDM5B.msd_peak_27221
chr17	32389268	32389633	WT_KDM5B.msd_peak_27222
chr17	32392357	32392606	WT_KDM5B.msd_peak_27223
chr17	32396268	32396543	WT_KDM5B.msd_peak_27224
chr17	32403118	32403325	WT_KDM5B.msd_peak_27225
chr17	32416843	32417051	WT_KDM5B.msd_peak_27226
chr17	32452585	32452848	WT_KDM5B.msd_peak_27227
chr17	32479741	32480031	WT_KDM5B.msd_peak_27228
chr17	32492550	32492791	WT_KDM5B.msd_peak_27229
chr17	32528596	32529029	WT_KDM5B.msd_peak_27230
chr17	32548181	32548555	WT_KDM5B.msd_peak_27231
chr17	32551033	32551239	WT_KDM5B.msd_peak_27232
chr17	32634954	32635231	WT_KDM5B.msd_peak_27233
chr17	32700166	32700371	WT_KDM5B.msd_peak_27234
chr17	32702803	32703093	WT_KDM5B.msd_peak_27235
chr17	32717431	32717633	WT_KDM5B.msd_peak_27236
chr17	32787855	32788151	WT_KDM5B.msd_peak_27237
chr17	32829769	32830213	WT_KDM5B.msd_peak_27238a
chr17	32829769	32830213	WT_KDM5B.msd_peak_27238b
chr17	32891142	32891475	WT_KDM5B.msd_peak_27239
chr17	32924773	32924973	WT_KDM5B.msd_peak_27240
chr17	32965904	32966104	WT_KDM5B.msd_peak_27241
chr17	32967261	32967463	WT_KDM5B.msd_peak_27242
chr17	33025922	33026360	WT_KDM5B.msd_peak_27243
chr17	33139569	33139781	WT_KDM5B.msd_peak_27244
chr17	33232422	33232713	WT_KDM5B.msd_peak_27245
chr17	33254702	33255048	WT_KDM5B.msd_peak_27246
chr17	33256551	33256803	WT_KDM5B.msd_peak_27247
chr17	33273776	33274006	WT_KDM5B.msd_peak_27248
chr17	33289603	33289944	WT_KDM5B.msd_peak_27249
chr17	33305614	33305899	WT_KDM5B.msd_peak_27250
chr17	33358524	33358832	WT_KDM5B.msd_peak_27251
chr17	33394196	33394511	WT_KDM5B.msd_peak_27252
chr17	33406022	33406222	WT_KDM5B.msd_peak_27253
chr17	33523872	33524379	WT_KDM5B.msd_peak_27254
chr17	33629807	33630036	WT_KDM5B.msd_peak_27255
chr17	33649625	33650335	WT_KDM5B.msd_peak_27256a
chr17	33649625	33650335	WT_KDM5B.msd_peak_27256b
chr17	33684833	33685403	WT_KDM5B.msd_peak_27257
chr17	33696005	33696218	WT_KDM5B.msd_peak_27258
chr17	33747389	33747664	WT_KDM5B.msd_peak_27259
chr17	33755389	33755737	WT_KDM5B.msd_peak_27260
chr17	33759988	33760243	WT_KDM5B.msd_peak_27261
chr17	33781207	33781475	WT_KDM5B.msd_peak_27262
chr17	33808095	33808335	WT_KDM5B.msd_peak_27263
[truncated: 62,053 more rows]

## Sheet: Extended Data Table 8
Extended Data Table 8: List of sgRNA sequences used
Gene	sgRNA target sequence
m_Kdm5b_sg1	AGACTGGGATCTGTAAGGTG
m_Kdm5b_sg2	GGCCAAGAAAACGGCCACTG
m_Ddx58	CGTTGGAGATGCTAAGACCG
m_Mda5	TGTGGGTTTGACATAGCGCG
m_Cgas	ACGCAAAGATATCTCGGAGG
m_Mavs	GCCACCAGACATCCTCGCGA
m_Sting1	TACCTTGGTAGACAATGAGG
H_DDX58	AGGTTGTTCACAAGAATCTG
H_MDA5	TGAAGCACGAGATGAGATAG
H_MAVS	GGGTATTGAAGAGATGCCAG
H_CGAS	CGAGGCCGCCCTGCCTAAGG
H_STING	TGAGTCACCTGGAGTGGATG

## Sheet: Extended Data Table 9
Extended Data Table 9: List of shRNA/siRNA sequence or catalog information
Gene	siRNA or shRNA sequence or catalog information
siRNA Ctl	Ambion Silencer®NegativeControl #1 siRNA_Cat# AM4611
m_Mavs_siRNA	Ambion™ Silencer™ Pre-Designed siRNA Cat# AM16708A; Lot# AS0285 XL; ID:507902
m_Sting_siRNA	Ambion™ Silencer™ Pre-Designed siRNA Cat# AM16708A; Lot# AS0285 XK; ID:169532
MMVL30_siRNA1 from IDT	AGCAGAACAAAGAAUCUUACCUCTA
MMVL30_siRNA2 from IDT	AUCUUCUUGAUGACUAUCUGAGCAG
MMVL30_Pinducer_shRNA1	CCACTTAGAGGTAAGATTCT
MMVL30_Pinducer_shRNA2	GTCAGGGTGRGGCCAAGTAT

## Sheet: Extended Data Table 10
Extended Data Table 10: List of primers used in RT-qPCR and ChIP-qPCR
Primer	Sequence
m_Gapdh_f	GACTTCAACAGCAACTCCCAC	RT-qPCR
m_Gapdh_r	TCCACCACCCTGTTGCTGTA	RT-qPCR
m_Oas3_f	CCCTTGGCAATCCTTATCAC	RT-qPCR
m_Oas3_r	CTGAGTTCACAGCAGCCGTA	RT-qPCR
m_Isg15_f	CTAGAGCTAGAGCCTGCAG	RT-qPCR
m_Isg15_r	AGTTAGTCACGGACACCAG	RT-qPCR
m_lrf7_f	CAATTCAGGGGATCCAGTTG	RT-qPCR
m_lrf7_r	AGGCATTGCTGAGGCTCACTT	RT-qPCR
m_lfi44_f	CTGATTACAAAAGAAGACATGACAGAC	RT-qPCR
m_lfi44_r	AGGCAAAACCAAAGACTCCA	RT-qPCR
m_Cxcl10_f	CCAAGTGCTGCCGTCATTTTC	RT-qPCR
m_Cxcl10_r	GGCTCGCAGGGATGATTTCAA	RT-qPCR
m_Mda5_f	CGGAAGTTGGAGTCAAAGC	RT-qPCR
m_Mda5_r	TTTGTTCAGTCTGAGTCATGG	RT-qPCR
m_Rig-I_f	GAGTACCACTTAAAGCCAGAG	RT-qPCR
m_Rig-I_r	AATCCATTTCTTCAGAGCATCC	RT-qPCR
m_Cxcl9_f	TAGGCAGGTTTGATCTCCGT	RT-qPCR
m_Cxcl9_r	CGATCCACTACAAATCCCTCA	RT-qPCR
m-Kdm5b_f	AGAGGCTGAATGAGCTGGAG	RT-qPCR
m-Kdm5b_r	TGGCAATTTTGGTCCATTTT	RT-qPCR
m_lfit3_f	TTCCCAGCAGCACAGAAAC	RT-qPCR
m_lfit3_r	AAATTCCAGGTGAAATGGCA	RT-qPCR
m_lfit1_f	CAAGGCAGGTTTCTGAGGAG	RT-qPCR
m_lfit1_r	GACCTGGTCACCATCAGCAT	RT-qPCR
m_Ifi35_f	GCTTGCTCCTCCTGAAGACT	RT-qPCR
m_Ifi35_r	ACTCTTCACTGCCAACCCTG	RT-qPCR
m_Ifitm1_f	CCTGTCCCTAGACTTCACGG	RT-qPCR
m_Ifitm1_r	GACCATGTGATCTGGTCCCT	RT-qPCR
m_Sting1_f	CCTAGCCTCGCACGAACTTG	RT-qPCR
m_Sting1_r	CGCACAGCCTTCCAGTAGC	RT-qPCR
m_Cgas_f	GTTCAAACACAAGAAATGCActg	RT-qPCR
m_Cgas_r	GCTGACGGAGTACACAATCCT	RT-qPCR
m_Ifi30_f	GGCTGACTCTGACAGGTGGT	RT-qPCR
m_Ifi30_r	CTTTCGCAAGCATCCTCC	RT-qPCR
m_Mavs-f	AGGGTGGGATGGACTGAGAT	RT-qPCR
m_Mavs-r	CTAGGGGAGAATGAGGTCGG	RT-qPCR
m_Irf9_f	TTCATCTATGGTGGCCGAGT	RT-qPCR
m_Irf9_r	ACGCCTCTGTCAAGCTGATT	RT-qPCR
m-Nlrc5-f	GCTGAGAGCATCCGACTGAAC	RT-qPCR
m-Nlrc5-r	AGGTACATCAAGCTCGAAGCA	RT-qPCR
m-Tap1_f	GGACTTGCCTTGTTCCGAGAG	RT-qPCR
m-Tap1_r	GCTGCCACATAACTGATAGCGA	RT-qPCR
m-Tap2_f	CTGGCGGACATGGCTTTACTT	RT-qPCR
m-Tap2_r	CTCCCACTTTTAGCAGTCCCC	RT-qPCR
m-Tapbp-f	GGCCTGTCTAAGAAACCTGCC	RT-qPCR
M-Tapbp-r	CCACCTTGAAGTATAGCTTTGGG	RT-qPCR
m-Lmp2-f	CTC TGC ACC AGC ACA TCT T	RT-qPCR
m-Lmp2-r	AGA GTG ATG GCA TCT GTG GT	RT-qPCR
m-LMP7-f	ATG GCG TTA CTG GAT CTG TGC GGT GC	RT-qPCR
m-LMP7-r	TCA CAG AGC GGC CTC TCC GTA CTT GTA	RT-qPCR
m-H2-kb-f	GCTGGTGAAGCAGAGAGACTCAG	RT-qPCR
m-H2-kb-r	GGTGACTTTATCTTCAGGTCTGCT	RT-qPCR
m-H2-db-f	AGTGGTGCTGCAGAGCATTACAA	RT-qPCR
m-H2-db-r	GGTGACTTCACCTTTAGATCTGGG	RT-qPCR
m-H2-d1-f	CTCCGTCCACTGACTCTTAC	RT-qPCR
m-H2-d1-r	GAGAACTGAGGGCTCTGGATG	RT-qPCR
m-H2-k1-f	TCTCCAACATGGCGACCGTTGCT	RT-qPCR
m-H2-k1-r	AGGTCTGGGAGCCTGGAGCCAG	RT-qPCR
MERVL_f	ATC TCC TGG CAC CTG GTA TG	RT-qPCR
MERVL_r	AGA AGA AGG CAT TTG CCA GA	RT-qPCR
IAP-gag_f	AATCTCAGAACCGCTCCATGA	RT-qPCR
IAP-gag_r	TTTCTTAAAATGCCCAGGCTT T	RT-qPCR
IAP-pol_f	CTTGCCCTTAAAGGTCTAAAAGCA	RT-qPCR
IAP-pol_r	GCGGTATAAGGTACAATTAAAAGATATGG	RT-qPCR
IAP-5'UTR_f	CGGGTCGCGGTAATAAAGGT	RT-qPCR
IAP-5'UTR_r	ACTCTCGTTCCCCAGCTGAA	RT-qPCR
IAPEz_f	AAGCAGCAATCACCCACTTTGG	RT-qPCR
IAPEz_r	CAATCATTAGATGTGGCTGCCAAG	RT-qPCR
MLV-2_f	CAATAAAGCCTCTTGCTGTTTGCATC	RT-qPCR
MLV-2_r	TGGGCAGGGGTCTCCAAATCT	RT-qPCR
ETnERV3-f	TGGCGGAGATAGGAAGAG	RT-qPCR
ETnERV3-r	ACAGAATGCTGCAAGAGC	RT-qPCR
GLN_f	CGTAAGGACCCTAGTGGCTG	RT-qPCR
GLN_r	GCACTCACTCTTCTTCACTCTG	RT-qPCR
LTR16D_f	ACTCATTCTTTCCTTGCTCCAT	RT-qPCR
LTR16D_r	TTGCCTCTGCCTCACCAC	RT-qPCR
m_Stat1_f	CGCGCATGCAACTGGCATATAACT	RT-qPCR
m_Stat1_r	ATGCTTCCGTTCCCACGTAGACTT	RT-qPCR
RLTR6_Mm-f	CTCTAGATGGGAGGGGTCG	RT-qPCR
RLTR6_Mm_r	CTCACCTCAGAGCCCGAC	RT-qPCR
MMVL30_f	CACTTGGGGCTTCTGTCCAA	RT-qPCR
MMVL30_f	CCATCAGAGCCTGGCAGTTA	RT-qPCR
MMERVK10C_f	CAAATAGCCCTACCATATGTCAG	RT-qPCR
MMERVK10C_r	GTATACTTTCTTCTTCAGGTCCAC	RT-qPCR
LINE1_f	TTTGGGACACAATGAAAGCA	RT-qPCR
LINE1_r	CTGCCGTCTACTCCTCTTGG	RT-qPCR
mouse gapdh-ChIP-qpcr_f	ATCCTGTAGGCCAGGTGATG	ChIP-qPCR
mouse gapdh-ChIp-qpcr_r	AGGCTCAAGGGCTTTTAAGG	ChIP-qPCR
mouse RLTR6_Mm-ChIP-qpcr_f	AGGGCTCAGTGGTTATGGTCTTTT	ChIP-qPCR
mouse RLTR6_Mm-ChIp-qpcr_r	AGGGGGAATGGGGAGGGAATAGG	ChIP-qPCR
mouse MMVL30-ChIP-qpcr_f	CCTTTGTTGCCCAGGTAAGTC	ChIP-qPCR
mouse MMVL30-ChIp-qpcr_r	CGCTGTAGCCAGTTGTGACCAG	ChIP-qPCR
mouse MMERVK10C-ChIP-qpcr_f	TTCGCCTCTGCAATCAAGCTCTC	ChIP-qPCR
mouse MMERVK10C-ChIp-qpcr_r	TCGCTCRTGCCTGAAGATGTTTC	ChIP-qPCR
mouse LINE1-ChIP-qpcr_f	TTTGGGACACAATGAAAGCA	ChIP-qPCR
mouse LINE1-ChIp-qpcr_r	CTGCCGTCTACTCCTCTTGG	ChIP-qPCR
mouse B1-ChIP-qpcr_f	GTGGCGCACGCCTTTAATC	ChIP-qPCR
mouse B1-ChIp-qpcr_r	GACAGGGTTTCTCTGTGTAG	ChIP-qPCR
H_18s_F	GCCGCTAGAGGTGAAATTCTTG	RT-qPCR
H_18s_R	CATTCTTGGCAAATGCTTTCG	RT-qPCR
H_KDM5B_F	AACAACATGCCAGTGATGGA	RT-qPCR
H_KDM5B_R	TACCAGGTTTTTGGCTCACC	RT-qPCR
H_ISG15_F	GCCTCAGCTCTGACACC	RT-qPCR
H_ISG15_R	CGAACTCATCTTTGCCAGTACA	RT-qPCR
H_IRF7_F	GTGGACTGAGGGCTTGTAG	RT-qPCR
H_IRF7_R	TCAACACCTGTGACTTCATGT	RT-qPCR
H_OASL-F	GCAGAAATTTCCAGGACCAC	RT-qPCR
H_OASL-R	CCCATCACGGTCACCATTG	RT-qPCR
H_MAVS_F	AGGAGACAGATGGAGACACA	RT-qPCR
H_MAVS_R	CAGAACTGGGCAGTACCC	RT-qPCR
H_DDX58_F	CCAGCATTACTAGTCAGAAGGAA	RT-qPCR
H_DDX58_R	CACAGTGCAATCTTGTCATCC	RT-qPCR
H_MDA5_F	CACTTCCTTCTGCCAAACTTG	RT-qPCR
H_MDA5_R	GAGCAACTTCTTTCAACCACAG	RT-qPCR
H_MLTA10_F	TCTCACAATCCTGGAGGCTG	RT-qPCR
H_MLTA10_R	GACCAAGAAGCAAGCCCTCA	RT-qPCR
H_MLT1B_F	TGCCTGTCTCCAAACACAGT	RT-qPCR
H_MLT1B_R	TACGGGCTGAGCTTGAGTTG	RT-qPCR
H_MER21C_F	GGAGCTTCCTGATTGGCAGA	RT-qPCR
H_MER21C_R	ATGTAGGGTGGCAAGCACTG	RT-qPCR
H_ERVL_F	ATATCCTGCCTGGATGGGGT	RT-qPCR
H_ERVL_R	GAGCTTCTTAGTCCTCCTGTGT	RT-qPCR
H_MLT1C49_F	TATTGCCGTACTGTGGGCTG	RT-qPCR
H_MLT1C49_R	TGGAACAGAGCCCTTCCTTG	RT-qPCR
H_MLT1C627_F	TGTGTCCTCCCCCTTCTCTT	RT-qPCR
H_MLT1C627_R	GCCTGTGGATGTGCCCTTAT	RT-qPCR
H_MER4D_F	CCCTAAAGAGGCAGGACACC	RT-qPCR
H_MER4D_R	TCAAGCAATCGTCAACCAGA	RT-qPCR
H_MER57B1_F	CCTCCTGAGCCAGAGTAGGT	RT-qPCR
H_MER57B1_R	ACCAGTCTGGCTGTTTCTGT	RT-qPCR
H_MTL2B4_F	GGAGAAGCTGATGGTGCAGA	RT-qPCR
H_MTL2B4_R	ACCAACCTTCCCAAGCAAGA	RT-qPCR
